# Supplementary material
Source: publisher figshare collection journal article supplement (https://acs.figshare.com/ndownloader/files/9592840)
Supplement: Supplementary file 1 [file 9592840]

data_128_1
_audit_creation_date              2017-03-01
_audit_creation_method
;
Olex2 1.2
(compiled 2017.02.23 svn.r3390 for OlexSys, GUI svn.r5320)
;
_shelx_SHELXL_version_number      '2016/6'
_publ_contact_author_address      ?
_publ_contact_author_email        ?
_publ_contact_author_id_orcid     ?
_publ_contact_author_name         ''
_publ_contact_author_phone        ?
_publ_section_references
;
Dolomanov, O.V., Bourhis, L.J., Gildea, R.J, Howard, J.A.K. & Puschmann, H.
 (2009), J. Appl. Cryst. 42, 339-341.

Sheldrick, G.M. (2015). Acta Cryst. A71, 3-8.

Sheldrick, G.M. (2015). Acta Cryst. C71, 3-8.
;
_chemical_name_common             ?
_chemical_name_systematic         ?
_chemical_formula_moiety          'C17 H23 F3 N O4 P'
_chemical_formula_sum             'C17 H23 F3 N O4 P'
_chemical_formula_weight          393.33
_chemical_absolute_configuration  ukn
_chemical_melting_point           ?
loop_
  _atom_type_symbol
  _atom_type_description
  _atom_type_scat_dispersion_real
  _atom_type_scat_dispersion_imag
  _atom_type_scat_source
 'C' 'C' 0.0181 0.0091 'International Tables Vol C Tables 4.2.6.8 and 6.1.1.4'
 'H' 'H' 0.0000 0.0000 'International Tables Vol C Tables 4.2.6.8 and 6.1.1.4'
 'F' 'F' 0.0727 0.0534 'International Tables Vol C Tables 4.2.6.8 and 6.1.1.4'
 'N' 'N' 0.0311 0.0180 'International Tables Vol C Tables 4.2.6.8 and 6.1.1.4'
 'O' 'O' 0.0492 0.0322 'International Tables Vol C Tables 4.2.6.8 and 6.1.1.4'
 'P' 'P' 0.2955 0.4335 'International Tables Vol C Tables 4.2.6.8 and 6.1.1.4'

_shelx_space_group_comment
;
The symmetry employed for this shelxl refinement is uniquely defined
by the following loop, which should always be used as a source of
symmetry information in preference to the above space-group names.
They are only intended as comments.
;
_space_group_crystal_system       'orthorhombic'
_space_group_IT_number            19
_space_group_name_H-M_alt         'P 21 21 21'
_space_group_name_Hall            'P 2ac 2ab'
loop_
  _space_group_symop_operation_xyz
 'x, y, z'
 '-x+1/2, -y, z+1/2'
 '-x, y+1/2, -z+1/2'
 'x+1/2, -y+1/2, -z'

_cell_length_a                    10.2112(2)
_cell_length_b                    17.8559(5)
_cell_length_c                    21.0675(4)
_cell_angle_alpha                 90
_cell_angle_beta                  90
_cell_angle_gamma                 90
_cell_volume                      3841.24(15)
_cell_formula_units_Z             8
_cell_measurement_reflns_used     6897
_cell_measurement_temperature     100.00(10)
_cell_measurement_theta_max       73.4230
_cell_measurement_theta_min       4.7990
_shelx_estimated_absorpt_T_max    0.781
_shelx_estimated_absorpt_T_min    0.643
_exptl_absorpt_coefficient_mu     1.730
_exptl_absorpt_correction_T_max   1.00000
_exptl_absorpt_correction_T_min   0.61679
_exptl_absorpt_correction_type    multi-scan
_exptl_absorpt_process_details
;
CrysAlisPro 1.171.38.43f (Rigaku Oxford Diffraction, 2015)
Empirical absorption correction using spherical harmonics,
 implemented in SCALE3 ABSPACK scaling algorithm.
;
_exptl_absorpt_special_details    ?
_exptl_crystal_colour             colorless
_exptl_crystal_density_diffrn     1.360
_exptl_crystal_density_meas       ?
_exptl_crystal_density_method     ?
_exptl_crystal_description        block
_exptl_crystal_F_000              1648
_exptl_crystal_size_max           0.28
_exptl_crystal_size_mid           0.2
_exptl_crystal_size_min           0.15
_exptl_transmission_factor_max    ?
_exptl_transmission_factor_min    ?
_diffrn_reflns_av_R_equivalents   0.0240
_diffrn_reflns_av_unetI/netI      0.0351
_diffrn_reflns_Laue_measured_fraction_full 0.999
_diffrn_reflns_Laue_measured_fraction_max 0.980
_diffrn_reflns_limit_h_max        12
_diffrn_reflns_limit_h_min        -12
_diffrn_reflns_limit_k_max        21
_diffrn_reflns_limit_k_min        -22
_diffrn_reflns_limit_l_max        16
_diffrn_reflns_limit_l_min        -25
_diffrn_reflns_number             10605
_diffrn_reflns_point_group_measured_fraction_full 0.916
_diffrn_reflns_point_group_measured_fraction_max 0.875
_diffrn_reflns_theta_full         67.684
_diffrn_reflns_theta_max          73.509
_diffrn_reflns_theta_min          4.197
_diffrn_ambient_environment       N~2~
_diffrn_ambient_temperature       100.00(10)
_diffrn_detector                  'CCD plate'
_diffrn_detector_area_resol_mean  5.2684
_diffrn_detector_type             AtlasS2
_diffrn_measured_fraction_theta_full 0.999
_diffrn_measured_fraction_theta_max 0.980
_diffrn_measurement_details
;
List of Runs (angles in degrees, time in seconds):

  # Type    Start    End  Width  t~exp~   \w     \q     \k     \f   Frames
--------------------------------------------------------------------------
  1  \w    -43.00  -1.00   1.00    1.00    --  -40.98   0.00  60.00   42
  2  \w     46.00  93.00   1.00    1.00    --   40.98-125.00 -90.00   47
  3  \w     34.00 100.00   1.00    1.00    --  106.95-125.00  30.00   66
  4  \w     38.00 109.00   1.00    1.00    --  106.95 -45.00-150.00   71
  5  \w     78.00 105.00   1.00    1.00    --  106.95  15.00 -60.00   27
  6  \w    133.00 178.00   1.00    1.00    --  106.95  15.00 -60.00   45
  7  \w     85.00 173.00   1.00    1.00    --  106.95  45.00-180.00   88
  8  \w   -124.00 -45.00   1.00    1.00    --  -40.98   0.00  60.00   79
;
_diffrn_measurement_device        'four-circle diffractometer'
_diffrn_measurement_device_type   'SuperNova, Dual, Cu at zero, AtlasS2'
_diffrn_measurement_method        '\w scans'
_diffrn_orient_matrix_type
'CrysAlisPro convention (1999,Acta A55,543-557)'
_diffrn_orient_matrix_UB_11       -0.0745582000
_diffrn_orient_matrix_UB_12       -0.0704788000
_diffrn_orient_matrix_UB_13       -0.0218935000
_diffrn_orient_matrix_UB_21       -0.1307141000
_diffrn_orient_matrix_UB_22       0.0372318000
_diffrn_orient_matrix_UB_23       0.0183720000
_diffrn_orient_matrix_UB_31       -0.0111688000
_diffrn_orient_matrix_UB_32       0.0329567000
_diffrn_orient_matrix_UB_33       -0.0673273000
_diffrn_radiation_monochromator   mirror
_diffrn_radiation_probe           x-ray
_diffrn_radiation_type            CuK\a
_diffrn_radiation_wavelength      1.54184
_diffrn_source                    'micro-focus sealed X-ray tube'
_diffrn_source_type               'SuperNova (Cu) X-ray Source'
_reflns_Friedel_coverage          0.598
_reflns_Friedel_fraction_full     0.809
_reflns_Friedel_fraction_max      0.742
_reflns_number_gt                 6528
_reflns_number_total              6790
_reflns_odcompleteness_completeness 99.92
_reflns_odcompleteness_iscentric  1
_reflns_odcompleteness_theta      66.97
_reflns_special_details
;
 Reflections were merged by SHELXL according to the crystal
 class for the calculation of statistics and refinement.
 
 _reflns_Friedel_fraction is defined as the number of unique
 Friedel pairs measured divided by the number that would be
 possible theoretically, ignoring centric projections and
 systematic absences.
;
_reflns_threshold_expression      'I > 2\s(I)'
_computing_cell_refinement        'CrysAlisPro 1.171.38.43f (Rigaku OD, 2015)'
_computing_data_collection        'CrysAlisPro 1.171.38.43f (Rigaku OD, 2015)'
_computing_data_reduction         'CrysAlisPro 1.171.38.43f (Rigaku OD, 2015)'
_computing_molecular_graphics     'Olex2 (Dolomanov et al., 2009)'
_computing_publication_material   'Olex2 (Dolomanov et al., 2009)'
_computing_structure_refinement   'ShelXL (Sheldrick, 2015)'
_computing_structure_solution     'ShelXT (Sheldrick, 2015)'
_refine_diff_density_max          0.345
_refine_diff_density_min          -0.362
_refine_diff_density_rms          0.052
_refine_ls_abs_structure_details
;
 Flack x determined using 2354 quotients [(I+)-(I-)]/[(I+)+(I-)]
 (Parsons, Flack and Wagner, Acta Cryst. B69 (2013) 249-259).
;
_refine_ls_abs_structure_Flack    0.482(11)
_refine_ls_extinction_coef        .
_refine_ls_extinction_method      none
_refine_ls_goodness_of_fit_ref    1.006
_refine_ls_hydrogen_treatment     constr
_refine_ls_matrix_type            full
_refine_ls_number_parameters      477
_refine_ls_number_reflns          6790
_refine_ls_number_restraints      0
_refine_ls_R_factor_all           0.0410
_refine_ls_R_factor_gt            0.0394
_refine_ls_restrained_S_all       1.006
_refine_ls_shift/su_max           0.000
_refine_ls_shift/su_mean          0.000
_refine_ls_structure_factor_coef  Fsqd
_refine_ls_weighting_details
'w=1/[\s^2^(Fo^2^)+(0.0695P)^2^+0.8777P] where P=(Fo^2^+2Fc^2^)/3'
_refine_ls_weighting_scheme       calc
_refine_ls_wR_factor_gt           0.1051
_refine_ls_wR_factor_ref          0.1071
_refine_special_details           ?
_olex2_refinement_description
;
1. Fixed Uiso
 At 1.2 times of:
  All C(H) groups, All C(H,H) groups, All N(H) groups
 At 1.5 times of:
  All C(H,H,H) groups
2.a Secondary CH2 refined with riding coordinates:
 C00P(H00A,H00B), C015(H01D,H01E), C016(H01F,H01G), C15(H15A,H15B), C16(H16A,
 H16B), C10(H10A,H10B)
2.b Aromatic/amide H refined with riding coordinates:
 N1(H1), N00I(H00I), C00J(H00J), C00L(H00L), C4(H4), C00U(H00U), C00V(H00V),
 C3(H3), C6(H6), C7(H7)
2.c Idealised Me refined as rotating group:
 C00Z(H00C,H00D,H00E), C012(H01A,H01B,H01C), C13(H13A,H13B,H13C), C14(H14A,
 H14B,H14C), C17(H17A,H17B,H17C), C9(H9A,H9B,H9C), C01F(H01H,H01I,H01J),
 C01G(H01K,H01L,H01M)
;
_atom_sites_solution_hydrogens    geom
_atom_sites_solution_primary      dual
_atom_sites_solution_secondary    ?
loop_
  _atom_site_label
  _atom_site_type_symbol
  _atom_site_fract_x
  _atom_site_fract_y
  _atom_site_fract_z
  _atom_site_U_iso_or_equiv
  _atom_site_adp_type
  _atom_site_occupancy
  _atom_site_site_symmetry_order
  _atom_site_calc_flag
  _atom_site_refinement_flags_posn
  _atom_site_refinement_flags_adp
  _atom_site_refinement_flags_occupancy
  _atom_site_disorder_assembly
  _atom_site_disorder_group
 P001 P 0.07226(8) 0.34807(4) 0.41009(3) 0.02304(17) Uani 1 1 d . . . . .
 P1 P 0.64059(7) 0.44822(4) 0.30294(4) 0.02526(18) Uani 1 1 d . . . . .
 F2 F 0.0048(2) 0.49755(14) 0.01013(11) 0.0483(6) Uani 1 1 d . . . . .
 F1 F 0.0029(2) 0.60822(13) 0.04657(12) 0.0486(6) Uani 1 1 d . . . . .
 O2 O 0.6568(2) 0.49854(13) 0.36324(10) 0.0287(5) Uani 1 1 d . . . . .
 O006 O 0.2256(2) 0.48298(12) 0.30143(11) 0.0280(5) Uani 1 1 d . . . . .
 F007 F 0.0064(3) 0.20294(13) -0.00665(10) 0.0496(6) Uani 1 1 d . . . . .
 O4 O 0.5313(2) 0.39134(12) 0.32475(11) 0.0290(5) Uani 1 1 d . . . . .
 O009 O 0.0721(2) 0.43383(12) 0.42868(10) 0.0272(5) Uani 1 1 d . . . . .
 O00A O 0.1648(2) 0.30183(13) 0.44659(11) 0.0325(5) Uani 1 1 d . . . . .
 F00B F -0.0111(3) 0.32145(13) -0.00465(11) 0.0559(7) Uani 1 1 d . . . . .
 F00C F -0.1777(2) 0.25311(19) 0.01640(11) 0.0606(8) Uani 1 1 d . . . . .
 O3 O 0.7645(2) 0.41499(14) 0.27993(12) 0.0341(5) Uani 1 1 d . . . . .
 F3 F -0.0861(2) 0.5205(2) 0.09955(12) 0.0675(9) Uani 1 1 d . . . . .
 O00F O -0.0771(2) 0.32557(13) 0.41695(10) 0.0289(5) Uani 1 1 d . . . . .
 N1 N 0.4615(2) 0.55340(14) 0.27076(12) 0.0218(5) Uani 1 1 d . . . . .
 H1 H 0.382246 0.538275 0.276053 0.026 Uiso 1 1 calc R . . . .
 O1 O 0.6003(2) 0.65216(14) 0.27918(13) 0.0393(6) Uani 1 1 d . . . . .
 N00I N 0.0442(2) 0.41054(13) 0.29243(11) 0.0197(5) Uani 1 1 d . . . . .
 H00I H -0.033437 0.407063 0.276860 0.024 Uiso 1 1 calc R . . . .
 C00J C 0.1162(3) 0.24452(17) 0.11161(15) 0.0271(7) Uani 1 1 d . . . . .
 H00J H 0.177097 0.230685 0.080937 0.032 Uiso 1 1 calc R . . . .
 C00K C 0.0634(3) 0.27033(16) 0.22113(14) 0.0224(6) Uani 1 1 d . . . . .
 C00L C 0.1532(3) 0.24939(16) 0.17416(14) 0.0251(6) Uani 1 1 d . . . . .
 H00L H 0.239230 0.238616 0.185479 0.030 Uiso 1 1 calc R . . . .
 C00M C 0.1099(3) 0.47516(17) 0.28524(13) 0.0222(6) Uani 1 1 d . . . . .
 C4 C 0.2943(3) 0.43194(18) 0.14172(15) 0.0281(7) Uani 1 1 d . . . . .
 H4 H 0.313016 0.382960 0.153677 0.034 Uiso 1 1 calc R . . . .
 C11 C 0.5543(3) 0.50269(17) 0.24408(14) 0.0234(6) Uani 1 1 d . . . . .
 C00P C 0.2291(3) 0.31643(18) 0.30290(15) 0.0252(6) Uani 1 1 d . . . . .
 H00A H 0.271605 0.341595 0.267673 0.030 Uiso 1 1 calc R . . . .
 H00B H 0.288364 0.296954 0.334880 0.030 Uiso 1 1 calc R . . . .
 C00Q C 0.0983(3) 0.34689(16) 0.32510(13) 0.0214(6) Uani 1 1 d . . . . .
 C00R C 0.1078(3) 0.27235(17) 0.28897(14) 0.0237(6) Uani 1 1 d . . . . .
 C5 C 0.3876(3) 0.48771(18) 0.15149(14) 0.0244(6) Uani 1 1 d . . . . .
 C12 C 0.4921(3) 0.62400(18) 0.28808(16) 0.0290(7) Uani 1 1 d . . . . .
 C00U C -0.0657(3) 0.28479(17) 0.20339(14) 0.0257(6) Uani 1 1 d . . . . .
 H00U H -0.126987 0.297763 0.234120 0.031 Uiso 1 1 calc R . . . .
 C00V C -0.1034(3) 0.27998(18) 0.14015(15) 0.0271(6) Uani 1 1 d . . . . .
 H00V H -0.189628 0.289955 0.128730 0.033 Uiso 1 1 calc R . . . .
 C2 C 0.1439(3) 0.52089(18) 0.09632(14) 0.0256(6) Uani 1 1 d . . . . .
 C00X C -0.0128(3) 0.26033(17) 0.09404(14) 0.0255(6) Uani 1 1 d . . . . .
 C3 C 0.1735(3) 0.44826(19) 0.11438(16) 0.0294(7) Uani 1 1 d . . . . .
 H3 H 0.112478 0.410267 0.108220 0.035 Uiso 1 1 calc R . . . .
 C00Z C 0.0340(3) 0.53966(17) 0.25694(15) 0.0290(7) Uani 1 1 d . . . . .
 H00C H 0.021015 0.577543 0.288658 0.043 Uiso 1 1 calc GR . . . .
 H00D H -0.049454 0.522042 0.242206 0.043 Uiso 1 1 calc GR . . . .
 H00E H 0.082210 0.560375 0.221982 0.043 Uiso 1 1 calc GR . . . .
 C1 C 0.0166(3) 0.5362(2) 0.06358(15) 0.0315(7) Uani 1 1 d . . . . .
 C6 C 0.3548(3) 0.56105(18) 0.13420(15) 0.0281(6) Uani 1 1 d . . . . .
 H6 H 0.414705 0.599420 0.141086 0.034 Uiso 1 1 calc R . . . .
 C012 C 0.0851(4) 0.19966(18) 0.32387(15) 0.0308(7) Uani 1 1 d . . . . .
 H01A H -0.006724 0.188130 0.323767 0.046 Uiso 1 1 calc GR . . . .
 H01B H 0.115125 0.204479 0.366862 0.046 Uiso 1 1 calc GR . . . .
 H01C H 0.132460 0.160144 0.303186 0.046 Uiso 1 1 calc GR . . . .
 C8 C 0.5194(3) 0.46761(19) 0.17850(15) 0.0290(7) Uani 1 1 d . . . . .
 C7 C 0.2344(3) 0.57757(19) 0.10695(15) 0.0292(7) Uani 1 1 d . . . . .
 H7 H 0.214361 0.626645 0.095804 0.035 Uiso 1 1 calc R . . . .
 C015 C 0.1973(4) 0.46923(19) 0.44492(17) 0.0331(7) Uani 1 1 d . . . . .
 H01D H 0.259381 0.463175 0.410454 0.040 Uiso 1 1 calc R . . . .
 H01E H 0.233819 0.446518 0.482814 0.040 Uiso 1 1 calc R . . . .
 C016 C -0.1236(4) 0.29403(19) 0.47663(15) 0.0317(7) Uani 1 1 d . . . . .
 H01F H -0.059515 0.258448 0.492271 0.038 Uiso 1 1 calc R . . . .
 H01G H -0.204515 0.267018 0.468947 0.038 Uiso 1 1 calc R . . . .
 C15 C 0.7799(3) 0.5377(2) 0.37718(17) 0.0325(7) Uani 1 1 d . . . . .
 H15A H 0.788587 0.581467 0.350187 0.039 Uiso 1 1 calc R . . . .
 H15B H 0.853875 0.504891 0.369374 0.039 Uiso 1 1 calc R . . . .
 C16 C 0.5485(4) 0.34507(19) 0.38059(17) 0.0332(7) Uani 1 1 d . . . . .
 H16A H 0.467200 0.343187 0.404369 0.040 Uiso 1 1 calc R . . . .
 H16B H 0.615230 0.366783 0.407693 0.040 Uiso 1 1 calc R . . . .
 C10 C 0.6246(3) 0.5256(2) 0.18396(15) 0.0322(7) Uani 1 1 d . . . . .
 H10A H 0.606204 0.574973 0.167020 0.039 Uiso 1 1 calc R . . . .
 H10B H 0.714499 0.509153 0.178767 0.039 Uiso 1 1 calc R . . . .
 C01A C -0.0494(4) 0.2596(2) 0.02572(16) 0.0332(7) Uani 1 1 d . . . . .
 C13 C 0.3828(4) 0.6675(2) 0.31889(19) 0.0384(8) Uani 1 1 d . . . . .
 H13A H 0.304134 0.638044 0.318397 0.058 Uiso 1 1 calc GR . . . .
 H13B H 0.368574 0.713197 0.295939 0.058 Uiso 1 1 calc GR . . . .
 H13C H 0.406056 0.678876 0.361976 0.058 Uiso 1 1 calc GR . . . .
 C14 C 0.7771(4) 0.5605(2) 0.44481(18) 0.0398(8) Uani 1 1 d . . . . .
 H14A H 0.702014 0.591676 0.452320 0.060 Uiso 1 1 calc GR . . . .
 H14B H 0.855313 0.587897 0.454773 0.060 Uiso 1 1 calc GR . . . .
 H14C H 0.771958 0.516747 0.471155 0.060 Uiso 1 1 calc GR . . . .
 C17 C 0.5881(4) 0.2674(2) 0.3619(2) 0.0414(8) Uani 1 1 d . . . . .
 H17A H 0.527163 0.248171 0.331237 0.062 Uiso 1 1 calc GR . . . .
 H17B H 0.588333 0.235733 0.398668 0.062 Uiso 1 1 calc GR . . . .
 H17C H 0.674278 0.268564 0.343645 0.062 Uiso 1 1 calc GR . . . .
 C9 C 0.5625(4) 0.3868(2) 0.16651(19) 0.0414(9) Uani 1 1 d . . . . .
 H9A H 0.649891 0.379781 0.182294 0.062 Uiso 1 1 calc GR . . . .
 H9B H 0.560762 0.376707 0.121762 0.062 Uiso 1 1 calc GR . . . .
 H9C H 0.504072 0.353143 0.187968 0.062 Uiso 1 1 calc GR . . . .
 C01F C 0.1699(5) 0.5514(2) 0.4562(2) 0.0445(9) Uani 1 1 d . . . . .
 H01H H 0.136516 0.573596 0.418007 0.067 Uiso 1 1 calc GR . . . .
 H01I H 0.249446 0.576254 0.468366 0.067 Uiso 1 1 calc GR . . . .
 H01J H 0.106332 0.556595 0.489530 0.067 Uiso 1 1 calc GR . . . .
 C01G C -0.1470(4) 0.3520(2) 0.52608(17) 0.0406(8) Uani 1 1 d . . . . .
 H01K H -0.212958 0.386289 0.511577 0.061 Uiso 1 1 calc GR . . . .
 H01L H -0.067200 0.378807 0.534068 0.061 Uiso 1 1 calc GR . . . .
 H01M H -0.175971 0.328316 0.564505 0.061 Uiso 1 1 calc GR . . . .

loop_
  _atom_site_aniso_label
  _atom_site_aniso_U_11
  _atom_site_aniso_U_22
  _atom_site_aniso_U_33
  _atom_site_aniso_U_23
  _atom_site_aniso_U_13
  _atom_site_aniso_U_12
 P001 0.0232(4) 0.0244(3) 0.0215(3) 0.0022(3) -0.0038(3) -0.0028(3)
 P1 0.0173(3) 0.0270(4) 0.0315(4) -0.0033(3) -0.0044(3) 0.0002(3)
 F2 0.0380(12) 0.0569(13) 0.0500(12) -0.0215(11) -0.0215(10) 0.0092(11)
 F1 0.0431(13) 0.0430(12) 0.0597(14) -0.0018(10) -0.0209(11) 0.0092(11)
 O2 0.0220(10) 0.0321(11) 0.0321(11) -0.0024(9) -0.0024(9) -0.0044(10)
 O006 0.0203(10) 0.0285(11) 0.0353(12) 0.0009(9) 0.0027(9) -0.0057(9)
 F007 0.0722(16) 0.0472(12) 0.0295(10) -0.0116(9) -0.0082(11) 0.0169(13)
 O4 0.0225(11) 0.0269(10) 0.0375(12) 0.0022(9) -0.0079(9) -0.0027(9)
 O009 0.0285(11) 0.0263(11) 0.0269(10) -0.0018(9) -0.0020(9) -0.0041(10)
 O00A 0.0353(13) 0.0314(11) 0.0307(12) 0.0039(9) -0.0125(10) 0.0019(11)
 F00B 0.089(2) 0.0436(12) 0.0352(11) 0.0128(10) -0.0093(12) -0.0025(14)
 F00C 0.0391(13) 0.107(2) 0.0362(13) -0.0064(14) -0.0156(10) 0.0032(14)
 O3 0.0209(11) 0.0411(13) 0.0403(13) -0.0082(11) -0.0054(10) 0.0063(10)
 F3 0.0196(10) 0.126(3) 0.0569(15) 0.0295(16) 0.0033(10) -0.0022(14)
 O00F 0.0264(11) 0.0362(12) 0.0241(10) 0.0048(9) -0.0003(9) -0.0106(10)
 N1 0.0147(11) 0.0220(11) 0.0286(12) -0.0001(10) 0.0009(9) -0.0022(10)
 O1 0.0273(12) 0.0343(12) 0.0563(15) -0.0063(12) 0.0017(11) -0.0134(11)
 N00I 0.0156(11) 0.0216(11) 0.0217(11) 0.0008(9) -0.0034(9) -0.0005(10)
 C00J 0.0250(16) 0.0273(15) 0.0289(15) 0.0004(12) 0.0045(12) 0.0047(13)
 C00K 0.0209(14) 0.0200(12) 0.0264(14) 0.0012(11) -0.0018(11) -0.0007(12)
 C00L 0.0193(14) 0.0241(13) 0.0318(15) 0.0005(12) -0.0005(12) 0.0030(13)
 C00M 0.0229(14) 0.0244(13) 0.0195(13) -0.0002(11) 0.0016(10) -0.0008(12)
 C4 0.0261(15) 0.0286(15) 0.0297(15) 0.0025(13) -0.0010(12) -0.0011(14)
 C11 0.0155(13) 0.0277(14) 0.0271(14) -0.0024(12) -0.0010(11) 0.0019(12)
 C00P 0.0185(13) 0.0275(14) 0.0296(14) 0.0005(12) -0.0042(12) 0.0022(12)
 C00Q 0.0170(13) 0.0208(13) 0.0264(13) 0.0027(11) -0.0037(11) -0.0013(12)
 C00R 0.0217(14) 0.0246(14) 0.0247(14) -0.0008(12) -0.0026(11) -0.0007(12)
 C5 0.0217(14) 0.0317(15) 0.0198(13) -0.0018(12) 0.0007(11) 0.0009(13)
 C12 0.0260(15) 0.0267(14) 0.0343(16) -0.0027(13) -0.0025(13) -0.0031(14)
 C00U 0.0182(13) 0.0318(15) 0.0272(14) -0.0047(12) 0.0020(12) -0.0015(13)
 C00V 0.0194(14) 0.0315(15) 0.0305(15) -0.0057(13) -0.0036(12) 0.0011(13)
 C2 0.0197(14) 0.0356(15) 0.0215(13) -0.0011(12) 0.0004(11) 0.0013(13)
 C00X 0.0277(16) 0.0224(13) 0.0264(15) 0.0005(12) -0.0015(12) 0.0003(13)
 C3 0.0243(15) 0.0312(15) 0.0327(16) 0.0006(13) -0.0024(12) -0.0065(14)
 C00Z 0.0346(18) 0.0239(15) 0.0285(15) 0.0069(12) 0.0011(13) 0.0022(14)
 C1 0.0240(16) 0.0421(18) 0.0283(15) -0.0013(14) -0.0004(12) 0.0027(15)
 C6 0.0225(15) 0.0310(15) 0.0307(15) 0.0002(13) -0.0022(12) -0.0044(14)
 C012 0.0353(18) 0.0245(14) 0.0324(16) -0.0001(13) -0.0061(14) -0.0014(14)
 C8 0.0229(15) 0.0367(17) 0.0273(15) -0.0067(13) -0.0028(12) 0.0042(14)
 C7 0.0269(16) 0.0306(15) 0.0301(15) 0.0030(13) 0.0009(13) 0.0002(14)
 C015 0.0342(18) 0.0340(17) 0.0312(16) 0.0007(14) -0.0118(13) -0.0119(15)
 C016 0.0345(18) 0.0346(16) 0.0260(15) 0.0066(13) 0.0026(13) -0.0086(15)
 C15 0.0251(16) 0.0354(17) 0.0371(17) -0.0005(14) -0.0042(13) -0.0098(15)
 C16 0.0305(17) 0.0301(16) 0.0391(17) 0.0020(14) -0.0093(14) -0.0045(15)
 C10 0.0177(14) 0.0484(19) 0.0305(16) -0.0002(15) 0.0027(12) -0.0014(15)
 C01A 0.0356(18) 0.0341(17) 0.0300(16) 0.0025(14) -0.0016(14) 0.0046(15)
 C13 0.0335(19) 0.0307(16) 0.051(2) -0.0120(15) 0.0034(15) -0.0003(15)
 C14 0.0345(18) 0.043(2) 0.0414(19) -0.0083(17) -0.0011(15) -0.0120(17)
 C17 0.0325(19) 0.0344(17) 0.057(2) 0.0068(17) -0.0028(17) 0.0013(16)
 C9 0.0323(18) 0.048(2) 0.044(2) -0.0201(17) -0.0136(16) 0.0156(18)
 C01F 0.054(2) 0.0337(18) 0.045(2) -0.0069(16) -0.0078(18) -0.0120(19)
 C01G 0.043(2) 0.0428(19) 0.0358(17) -0.0021(16) 0.0120(16) -0.0083(19)

_geom_special_details
;
 All esds (except the esd in the dihedral angle between two l.s. planes)
 are estimated using the full covariance matrix.  The cell esds are taken
 into account individually in the estimation of esds in distances, angles
 and torsion angles; correlations between esds in cell parameters are only
 used when they are defined by crystal symmetry.  An approximate (isotropic)
 treatment of cell esds is used for estimating esds involving l.s. planes.
;
loop_
  _geom_bond_atom_site_label_1
  _geom_bond_atom_site_label_2
  _geom_bond_distance
  _geom_bond_site_symmetry_2
  _geom_bond_publ_flag
 P001 O009 1.581(2) . ?
 P001 O00A 1.472(2) . ?
 P001 O00F 1.583(2) . ?
 P001 C00Q 1.810(3) . ?
 P1 O2 1.565(2) . ?
 P1 O4 1.578(2) . ?
 P1 O3 1.480(2) . ?
 P1 C11 1.806(3) . ?
 F2 C1 1.326(4) . ?
 F1 C1 1.343(4) . ?
 O2 C15 1.469(4) . ?
 O006 C00M 1.237(4) . ?
 F007 C01A 1.347(4) . ?
 O4 C16 1.448(4) . ?
 O009 C015 1.467(4) . ?
 F00B C01A 1.335(4) . ?
 F00C C01A 1.329(4) . ?
 F3 C1 1.324(4) . ?
 O00F C016 1.457(4) . ?
 N1 H1 0.8600 . ?
 N1 C11 1.426(4) . ?
 N1 C12 1.349(4) . ?
 O1 C12 1.228(4) . ?
 N00I H00I 0.8600 . ?
 N00I C00M 1.344(4) . ?
 N00I C00Q 1.439(4) . ?
 C00J H00J 0.9300 . ?
 C00J C00L 1.374(4) . ?
 C00J C00X 1.397(5) . ?
 C00K C00L 1.400(4) . ?
 C00K C00R 1.500(4) . ?
 C00K C00U 1.394(4) . ?
 C00L H00L 0.9300 . ?
 C00M C00Z 1.511(4) . ?
 C4 H4 0.9300 . ?
 C4 C5 1.394(4) . ?
 C4 C3 1.392(5) . ?
 C11 C8 1.558(4) . ?
 C11 C10 1.512(4) . ?
 C00P H00A 0.9700 . ?
 C00P H00B 0.9700 . ?
 C00P C00Q 1.516(4) . ?
 C00P C00R 1.497(4) . ?
 C00Q C00R 1.536(4) . ?
 C00R C012 1.510(4) . ?
 C5 C6 1.400(4) . ?
 C5 C8 1.504(4) . ?
 C12 C13 1.507(5) . ?
 C00U H00U 0.9300 . ?
 C00U C00V 1.389(4) . ?
 C00V H00V 0.9300 . ?
 C00V C00X 1.387(4) . ?
 C2 C3 1.385(5) . ?
 C2 C1 1.496(4) . ?
 C2 C7 1.389(5) . ?
 C00X C01A 1.487(4) . ?
 C3 H3 0.9300 . ?
 C00Z H00C 0.9600 . ?
 C00Z H00D 0.9600 . ?
 C00Z H00E 0.9600 . ?
 C6 H6 0.9300 . ?
 C6 C7 1.388(5) . ?
 C012 H01A 0.9600 . ?
 C012 H01B 0.9600 . ?
 C012 H01C 0.9600 . ?
 C8 C10 1.496(5) . ?
 C8 C9 1.530(5) . ?
 C7 H7 0.9300 . ?
 C015 H01D 0.9700 . ?
 C015 H01E 0.9700 . ?
 C015 C01F 1.513(5) . ?
 C016 H01F 0.9700 . ?
 C016 H01G 0.9700 . ?
 C016 C01G 1.488(5) . ?
 C15 H15A 0.9700 . ?
 C15 H15B 0.9700 . ?
 C15 C14 1.482(5) . ?
 C16 H16A 0.9700 . ?
 C16 H16B 0.9700 . ?
 C16 C17 1.497(5) . ?
 C10 H10A 0.9700 . ?
 C10 H10B 0.9700 . ?
 C13 H13A 0.9600 . ?
 C13 H13B 0.9600 . ?
 C13 H13C 0.9600 . ?
 C14 H14A 0.9600 . ?
 C14 H14B 0.9600 . ?
 C14 H14C 0.9600 . ?
 C17 H17A 0.9600 . ?
 C17 H17B 0.9600 . ?
 C17 H17C 0.9600 . ?
 C9 H9A 0.9600 . ?
 C9 H9B 0.9600 . ?
 C9 H9C 0.9600 . ?
 C01F H01H 0.9600 . ?
 C01F H01I 0.9600 . ?
 C01F H01J 0.9600 . ?
 C01G H01K 0.9600 . ?
 C01G H01L 0.9600 . ?
 C01G H01M 0.9600 . ?

loop_
  _geom_angle_atom_site_label_1
  _geom_angle_atom_site_label_2
  _geom_angle_atom_site_label_3
  _geom_angle
  _geom_angle_site_symmetry_1
  _geom_angle_site_symmetry_3
  _geom_angle_publ_flag
 O009 P001 O00F 102.84(13) . . ?
 O009 P001 C00Q 104.86(13) . . ?
 O00A P001 O009 114.50(13) . . ?
 O00A P001 O00F 115.36(14) . . ?
 O00A P001 C00Q 114.57(14) . . ?
 O00F P001 C00Q 103.23(13) . . ?
 O2 P1 O4 102.01(12) . . ?
 O2 P1 C11 107.46(13) . . ?
 O4 P1 C11 101.62(13) . . ?
 O3 P1 O2 113.94(13) . . ?
 O3 P1 O4 116.27(14) . . ?
 O3 P1 C11 114.10(14) . . ?
 C15 O2 P1 121.8(2) . . ?
 C16 O4 P1 121.2(2) . . ?
 C015 O009 P001 118.3(2) . . ?
 C016 O00F P001 119.4(2) . . ?
 C11 N1 H1 118.5 . . ?
 C12 N1 H1 118.5 . . ?
 C12 N1 C11 123.1(3) . . ?
 C00M N00I H00I 118.7 . . ?
 C00M N00I C00Q 122.7(2) . . ?
 C00Q N00I H00I 118.7 . . ?
 C00L C00J H00J 120.0 . . ?
 C00L C00J C00X 120.0(3) . . ?
 C00X C00J H00J 120.0 . . ?
 C00L C00K C00R 118.8(3) . . ?
 C00U C00K C00L 118.6(3) . . ?
 C00U C00K C00R 122.5(3) . . ?
 C00J C00L C00K 121.0(3) . . ?
 C00J C00L H00L 119.5 . . ?
 C00K C00L H00L 119.5 . . ?
 O006 C00M N00I 122.9(3) . . ?
 O006 C00M C00Z 120.8(3) . . ?
 N00I C00M C00Z 116.3(3) . . ?
 C5 C4 H4 119.4 . . ?
 C3 C4 H4 119.4 . . ?
 C3 C4 C5 121.2(3) . . ?
 N1 C11 P1 113.3(2) . . ?
 N1 C11 C8 116.9(2) . . ?
 N1 C11 C10 118.3(3) . . ?
 C8 C11 P1 120.3(2) . . ?
 C10 C11 P1 119.3(2) . . ?
 C10 C11 C8 58.3(2) . . ?
 H00A C00P H00B 114.7 . . ?
 C00Q C00P H00A 117.6 . . ?
 C00Q C00P H00B 117.6 . . ?
 C00R C00P H00A 117.6 . . ?
 C00R C00P H00B 117.6 . . ?
 C00R C00P C00Q 61.3(2) . . ?
 N00I C00Q P001 114.0(2) . . ?
 N00I C00Q C00P 118.3(3) . . ?
 N00I C00Q C00R 118.1(2) . . ?
 C00P C00Q P001 116.0(2) . . ?
 C00P C00Q C00R 58.71(19) . . ?
 C00R C00Q P001 120.6(2) . . ?
 C00K C00R C00P 116.7(3) . . ?
 C00K C00R C00Q 118.3(2) . . ?
 C00K C00R C012 113.4(3) . . ?
 C00P C00R C00Q 59.97(19) . . ?
 C00P C00R C012 118.9(3) . . ?
 C012 C00R C00Q 119.6(2) . . ?
 C4 C5 C6 117.8(3) . . ?
 C4 C5 C8 119.8(3) . . ?
 C6 C5 C8 122.4(3) . . ?
 N1 C12 C13 115.2(3) . . ?
 O1 C12 N1 123.4(3) . . ?
 O1 C12 C13 121.4(3) . . ?
 C00K C00U H00U 119.7 . . ?
 C00V C00U C00K 120.5(3) . . ?
 C00V C00U H00U 119.7 . . ?
 C00U C00V H00V 119.9 . . ?
 C00X C00V C00U 120.2(3) . . ?
 C00X C00V H00V 119.9 . . ?
 C3 C2 C1 119.2(3) . . ?
 C3 C2 C7 119.5(3) . . ?
 C7 C2 C1 121.3(3) . . ?
 C00J C00X C01A 119.5(3) . . ?
 C00V C00X C00J 119.6(3) . . ?
 C00V C00X C01A 120.8(3) . . ?
 C4 C3 C2 120.2(3) . . ?
 C4 C3 H3 119.9 . . ?
 C2 C3 H3 119.9 . . ?
 C00M C00Z H00C 109.5 . . ?
 C00M C00Z H00D 109.5 . . ?
 C00M C00Z H00E 109.5 . . ?
 H00C C00Z H00D 109.5 . . ?
 H00C C00Z H00E 109.5 . . ?
 H00D C00Z H00E 109.5 . . ?
 F2 C1 F1 105.2(3) . . ?
 F2 C1 C2 112.0(3) . . ?
 F1 C1 C2 112.9(3) . . ?
 F3 C1 F2 107.7(3) . . ?
 F3 C1 F1 105.8(3) . . ?
 F3 C1 C2 112.7(3) . . ?
 C5 C6 H6 119.4 . . ?
 C7 C6 C5 121.2(3) . . ?
 C7 C6 H6 119.4 . . ?
 C00R C012 H01A 109.5 . . ?
 C00R C012 H01B 109.5 . . ?
 C00R C012 H01C 109.5 . . ?
 H01A C012 H01B 109.5 . . ?
 H01A C012 H01C 109.5 . . ?
 H01B C012 H01C 109.5 . . ?
 C5 C8 C11 116.4(3) . . ?
 C5 C8 C9 114.9(3) . . ?
 C10 C8 C11 59.3(2) . . ?
 C10 C8 C5 120.4(3) . . ?
 C10 C8 C9 117.3(3) . . ?
 C9 C8 C11 117.4(3) . . ?
 C2 C7 H7 120.0 . . ?
 C6 C7 C2 120.1(3) . . ?
 C6 C7 H7 120.0 . . ?
 O009 C015 H01D 110.3 . . ?
 O009 C015 H01E 110.3 . . ?
 O009 C015 C01F 107.1(3) . . ?
 H01D C015 H01E 108.6 . . ?
 C01F C015 H01D 110.3 . . ?
 C01F C015 H01E 110.3 . . ?
 O00F C016 H01F 109.0 . . ?
 O00F C016 H01G 109.0 . . ?
 O00F C016 C01G 112.8(3) . . ?
 H01F C016 H01G 107.8 . . ?
 C01G C016 H01F 109.0 . . ?
 C01G C016 H01G 109.0 . . ?
 O2 C15 H15A 110.1 . . ?
 O2 C15 H15B 110.1 . . ?
 O2 C15 C14 107.8(3) . . ?
 H15A C15 H15B 108.5 . . ?
 C14 C15 H15A 110.1 . . ?
 C14 C15 H15B 110.1 . . ?
 O4 C16 H16A 109.6 . . ?
 O4 C16 H16B 109.6 . . ?
 O4 C16 C17 110.3(3) . . ?
 H16A C16 H16B 108.1 . . ?
 C17 C16 H16A 109.6 . . ?
 C17 C16 H16B 109.6 . . ?
 C11 C10 H10A 117.5 . . ?
 C11 C10 H10B 117.5 . . ?
 C8 C10 C11 62.4(2) . . ?
 C8 C10 H10A 117.5 . . ?
 C8 C10 H10B 117.5 . . ?
 H10A C10 H10B 114.6 . . ?
 F007 C01A C00X 113.0(3) . . ?
 F00B C01A F007 104.7(3) . . ?
 F00B C01A C00X 112.5(3) . . ?
 F00C C01A F007 106.1(3) . . ?
 F00C C01A F00B 106.9(3) . . ?
 F00C C01A C00X 113.1(3) . . ?
 C12 C13 H13A 109.5 . . ?
 C12 C13 H13B 109.5 . . ?
 C12 C13 H13C 109.5 . . ?
 H13A C13 H13B 109.5 . . ?
 H13A C13 H13C 109.5 . . ?
 H13B C13 H13C 109.5 . . ?
 C15 C14 H14A 109.5 . . ?
 C15 C14 H14B 109.5 . . ?
 C15 C14 H14C 109.5 . . ?
 H14A C14 H14B 109.5 . . ?
 H14A C14 H14C 109.5 . . ?
 H14B C14 H14C 109.5 . . ?
 C16 C17 H17A 109.5 . . ?
 C16 C17 H17B 109.5 . . ?
 C16 C17 H17C 109.5 . . ?
 H17A C17 H17B 109.5 . . ?
 H17A C17 H17C 109.5 . . ?
 H17B C17 H17C 109.5 . . ?
 C8 C9 H9A 109.5 . . ?
 C8 C9 H9B 109.5 . . ?
 C8 C9 H9C 109.5 . . ?
 H9A C9 H9B 109.5 . . ?
 H9A C9 H9C 109.5 . . ?
 H9B C9 H9C 109.5 . . ?
 C015 C01F H01H 109.5 . . ?
 C015 C01F H01I 109.5 . . ?
 C015 C01F H01J 109.5 . . ?
 H01H C01F H01I 109.5 . . ?
 H01H C01F H01J 109.5 . . ?
 H01I C01F H01J 109.5 . . ?
 C016 C01G H01K 109.5 . . ?
 C016 C01G H01L 109.5 . . ?
 C016 C01G H01M 109.5 . . ?
 H01K C01G H01L 109.5 . . ?
 H01K C01G H01M 109.5 . . ?
 H01L C01G H01M 109.5 . . ?

_shelx_res_file
;
TITL 128_1_a.res in P2(1)2(1)2(1)
    128_1.res
    created by SHELXL-2016/6 at 08:27:29 on 01-Mar-2017
REM Old TITL 128_1_a.res in P2(1)2(1)2(1)
REM SHELXT solution in P2(1)2(1)2(1)
REM R1 0.096, Rweak 0.034, Alpha 0.006, Orientation as input
REM Flack x = 0.479 ( 0.010 ) from Parsons' quotients
REM Formula found by SHELXT: C34 N3 O7 P2 F6
CELL 1.54184 10.2112 17.8559 21.0675 90 90 90
ZERR 8 0.0002 0.0005 0.0004 0 0 0
LATT -1
SYMM 0.5-X,-Y,0.5+Z
SYMM -X,0.5+Y,0.5-Z
SYMM 0.5+X,0.5-Y,-Z
SFAC C H F N O P
UNIT 136 184 24 8 32 8

L.S. 20
PLAN  20
SIZE 0.28 0.2 0.15
BOND $H
list 4
HTAB
fmap 2
acta
MERG 2
REM <olex2.extras>
REM <HklSrc "%.\\128_1.hkl">
REM </olex2.extras>

WGHT    0.069500    0.877700
FVAR       0.42168
P001  6    0.072256    0.348072    0.410092    11.00000    0.02323    0.02438 =
         0.02151    0.00217   -0.00385   -0.00277
P1    6    0.640593    0.448223    0.302943    11.00000    0.01730    0.02696 =
         0.03151   -0.00329   -0.00440    0.00018
F2    3    0.004839    0.497548    0.010134    11.00000    0.03795    0.05692 =
         0.05003   -0.02154   -0.02150    0.00916
F1    3    0.002899    0.608221    0.046566    11.00000    0.04312    0.04296 =
         0.05967   -0.00178   -0.02091    0.00925
O2    5    0.656808    0.498539    0.363238    11.00000    0.02204    0.03206 =
         0.03206   -0.00237   -0.00241   -0.00444
O006  5    0.225577    0.482975    0.301427    11.00000    0.02026    0.02853 =
         0.03530    0.00088    0.00274   -0.00575
F007  3    0.006394    0.202936   -0.006652    11.00000    0.07223    0.04715 =
         0.02953   -0.01157   -0.00817    0.01693
O4    5    0.531261    0.391344    0.324751    11.00000    0.02245    0.02686 =
         0.03754    0.00215   -0.00786   -0.00274
O009  5    0.072105    0.433830    0.428678    11.00000    0.02848    0.02632 =
         0.02685   -0.00183   -0.00202   -0.00410
O00A  5    0.164811    0.301826    0.446593    11.00000    0.03535    0.03142 =
         0.03072    0.00386   -0.01246    0.00186
F00B  3   -0.011051    0.321452   -0.004647    11.00000    0.08881    0.04363 =
         0.03523    0.01283   -0.00927   -0.00245
F00C  3   -0.177682    0.253110    0.016400    11.00000    0.03910    0.10665 =
         0.03616   -0.00640   -0.01563    0.00325
O3    5    0.764549    0.414990    0.279926    11.00000    0.02094    0.04111 =
         0.04026   -0.00822   -0.00538    0.00627
F3    3   -0.086143    0.520456    0.099548    11.00000    0.01961    0.12609 =
         0.05693    0.02950    0.00332   -0.00219
O00F  5   -0.077074    0.325571    0.416953    11.00000    0.02645    0.03623 =
         0.02407    0.00484   -0.00034   -0.01062
N1    4    0.461458    0.553401    0.270762    11.00000    0.01471    0.02203 =
         0.02861   -0.00011    0.00085   -0.00219
AFIX  43
H1    2    0.382246    0.538275    0.276053    11.00000   -1.20000
AFIX   0
O1    5    0.600258    0.652162    0.279183    11.00000    0.02727    0.03430 =
         0.05628   -0.00633    0.00169   -0.01342

N00I  4    0.044183    0.410537    0.292426    11.00000    0.01564    0.02162 =
         0.02170    0.00083   -0.00337   -0.00047
AFIX  43
H00I  2   -0.033437    0.407063    0.276860    11.00000   -1.20000
AFIX   0
C00J  1    0.116233    0.244517    0.111613    11.00000    0.02497    0.02731 =
         0.02891    0.00045    0.00445    0.00467
AFIX  43
H00J  2    0.177097    0.230685    0.080937    11.00000   -1.20000
AFIX   0
C00K  1    0.063426    0.270330    0.221128    11.00000    0.02089    0.01997 =
         0.02638    0.00118   -0.00177   -0.00074
C00L  1    0.153236    0.249389    0.174162    11.00000    0.01929    0.02415 =
         0.03177    0.00049   -0.00054    0.00305
AFIX  43
H00L  2    0.239230    0.238616    0.185479    11.00000   -1.20000
AFIX   0
C00M  1    0.109927    0.475163    0.285241    11.00000    0.02286    0.02437 =
         0.01947   -0.00023    0.00161   -0.00077

C4    1    0.294277    0.431938    0.141721    11.00000    0.02605    0.02857 =
         0.02974    0.00250   -0.00097   -0.00108
AFIX  43
H4    2    0.313016    0.382960    0.153677    11.00000   -1.20000
AFIX   0
C11   1    0.554300    0.502685    0.244080    11.00000    0.01549    0.02770 =
         0.02713   -0.00244   -0.00098    0.00192

C00P  1    0.229115    0.316428    0.302899    11.00000    0.01846    0.02750 =
         0.02960    0.00053   -0.00423    0.00222
AFIX  23
H00A  2    0.271605    0.341595    0.267673    11.00000   -1.20000
H00B  2    0.288364    0.296954    0.334880    11.00000   -1.20000
AFIX   0
C00Q  1    0.098313    0.346895    0.325098    11.00000    0.01703    0.02075 =
         0.02637    0.00271   -0.00366   -0.00135
C00R  1    0.107826    0.272347    0.288970    11.00000    0.02169    0.02461 =
         0.02474   -0.00077   -0.00257   -0.00069

C5    1    0.387620    0.487708    0.151492    11.00000    0.02169    0.03166 =
         0.01979   -0.00180    0.00070    0.00085
C12   1    0.492140    0.623997    0.288084    11.00000    0.02601    0.02669 =
         0.03427   -0.00270   -0.00247   -0.00308
C00U  1   -0.065663    0.284792    0.203389    11.00000    0.01823    0.03182 =
         0.02718   -0.00466    0.00205   -0.00151
AFIX  43
H00U  2   -0.126987    0.297763    0.234120    11.00000   -1.20000
AFIX   0
C00V  1   -0.103402    0.279977    0.140155    11.00000    0.01938    0.03149 =
         0.03054   -0.00570   -0.00357    0.00108
AFIX  43
H00V  2   -0.189628    0.289955    0.128730    11.00000   -1.20000
AFIX   0

C2    1    0.143856    0.520887    0.096321    11.00000    0.01969    0.03556 =
         0.02149   -0.00115    0.00041    0.00130
C00X  1   -0.012790    0.260327    0.094040    11.00000    0.02767    0.02241 =
         0.02639    0.00050   -0.00155    0.00034
C3    1    0.173474    0.448257    0.114378    11.00000    0.02431    0.03118 =
         0.03267    0.00060   -0.00244   -0.00649
AFIX  43
H3    2    0.112478    0.410267    0.108220    11.00000   -1.20000
AFIX   0

C00Z  1    0.034004    0.539660    0.256942    11.00000    0.03458    0.02385 =
         0.02848    0.00694    0.00108    0.00221
AFIX 137
H00C  2    0.021015    0.577543    0.288658    11.00000   -1.50000
H00D  2   -0.049454    0.522042    0.242206    11.00000   -1.50000
H00E  2    0.082210    0.560375    0.221982    11.00000   -1.50000
AFIX   0

C1    1    0.016618    0.536174    0.063579    11.00000    0.02400    0.04213 =
         0.02828   -0.00133   -0.00042    0.00271
C6    1    0.354771    0.561054    0.134195    11.00000    0.02247    0.03103 =
         0.03074    0.00017   -0.00223   -0.00436
AFIX  43
H6    2    0.414705    0.599420    0.141086    11.00000   -1.20000
AFIX   0

C012  1    0.085103    0.199659    0.323873    11.00000    0.03528    0.02455 =
         0.03244   -0.00009   -0.00609   -0.00142
AFIX 137
H01A  2   -0.006724    0.188130    0.323767    11.00000   -1.50000
H01B  2    0.115125    0.204479    0.366862    11.00000   -1.50000
H01C  2    0.132460    0.160144    0.303186    11.00000   -1.50000
AFIX   0

C8    1    0.519384    0.467605    0.178496    11.00000    0.02288    0.03671 =
         0.02732   -0.00670   -0.00283    0.00424
C7    1    0.234401    0.577570    0.106952    11.00000    0.02693    0.03058 =
         0.03012    0.00301    0.00092    0.00019
AFIX  43
H7    2    0.214361    0.626645    0.095804    11.00000   -1.20000
AFIX   0

C015  1    0.197294    0.469231    0.444921    11.00000    0.03421    0.03401 =
         0.03115    0.00073   -0.01177   -0.01186
AFIX  23
H01D  2    0.259381    0.463175    0.410454    11.00000   -1.20000
H01E  2    0.233819    0.446518    0.482814    11.00000   -1.20000
AFIX   0
C016  1   -0.123632    0.294028    0.476627    11.00000    0.03452    0.03460 =
         0.02598    0.00664    0.00264   -0.00855
AFIX  23
H01F  2   -0.059515    0.258448    0.492271    11.00000   -1.20000
H01G  2   -0.204515    0.267018    0.468947    11.00000   -1.20000
AFIX   0

C15   1    0.779940    0.537734    0.377176    11.00000    0.02514    0.03537 =
         0.03708   -0.00053   -0.00423   -0.00976
AFIX  23
H15A  2    0.788587    0.581467    0.350187    11.00000   -1.20000
H15B  2    0.853875    0.504891    0.369374    11.00000   -1.20000
AFIX   0
C16   1    0.548480    0.345069    0.380592    11.00000    0.03049    0.03012 =
         0.03910    0.00198   -0.00928   -0.00453
AFIX  23
H16A  2    0.467200    0.343187    0.404369    11.00000   -1.20000
H16B  2    0.615230    0.366783    0.407693    11.00000   -1.20000
AFIX   0
C10   1    0.624577    0.525562    0.183955    11.00000    0.01769    0.04840 =
         0.03048   -0.00025    0.00265   -0.00142
AFIX  23
H10A  2    0.606204    0.574973    0.167020    11.00000   -1.20000
H10B  2    0.714499    0.509153    0.178767    11.00000   -1.20000
AFIX   0

C01A  1   -0.049446    0.259610    0.025719    11.00000    0.03562    0.03405 =
         0.02995    0.00248   -0.00161    0.00460
C13   1    0.382807    0.667472    0.318894    11.00000    0.03352    0.03067 =
         0.05105   -0.01203    0.00343   -0.00028
AFIX 137
H13A  2    0.304134    0.638044    0.318397    11.00000   -1.50000
H13B  2    0.368574    0.713197    0.295939    11.00000   -1.50000
H13C  2    0.406056    0.678876    0.361976    11.00000   -1.50000
AFIX   0
C14   1    0.777052    0.560520    0.444813    11.00000    0.03451    0.04340 =
         0.04142   -0.00832   -0.00112   -0.01199
AFIX 137
H14A  2    0.702014    0.591676    0.452320    11.00000   -1.50000
H14B  2    0.855313    0.587897    0.454773    11.00000   -1.50000
H14C  2    0.771958    0.516747    0.471155    11.00000   -1.50000
AFIX   0
C17   1    0.588120    0.267417    0.361855    11.00000    0.03248    0.03437 =
         0.05725    0.00682   -0.00282    0.00128
AFIX 137
H17A  2    0.527163    0.248171    0.331237    11.00000   -1.50000
H17B  2    0.588333    0.235733    0.398668    11.00000   -1.50000
H17C  2    0.674278    0.268564    0.343645    11.00000   -1.50000
AFIX   0
C9    1    0.562547    0.386782    0.166514    11.00000    0.03226    0.04829 =
         0.04355   -0.02009   -0.01357    0.01560
AFIX 137
H9A   2    0.649891    0.379781    0.182294    11.00000   -1.50000
H9B   2    0.560762    0.376707    0.121762    11.00000   -1.50000
H9C   2    0.504072    0.353143    0.187968    11.00000   -1.50000
AFIX   0

C01F  1    0.169893    0.551431    0.456240    11.00000    0.05445    0.03367 =
         0.04528   -0.00686   -0.00778   -0.01197
AFIX 137
H01H  2    0.136516    0.573596    0.418007    11.00000   -1.50000
H01I  2    0.249446    0.576254    0.468366    11.00000   -1.50000
H01J  2    0.106332    0.556595    0.489530    11.00000   -1.50000
AFIX   0
C01G  1   -0.147015    0.352003    0.526081    11.00000    0.04319    0.04277 =
         0.03582   -0.00212    0.01197   -0.00825
AFIX 137
H01K  2   -0.212958    0.386289    0.511577    11.00000   -1.50000
H01L  2   -0.067200    0.378807    0.534068    11.00000   -1.50000
H01M  2   -0.175971    0.328316    0.564505    11.00000   -1.50000
AFIX   0
HKLF 4


REM  128_1_a.res in P2(1)2(1)2(1)
REM R1 =  0.0394 for    6528 Fo > 4sig(Fo)  and  0.0410 for all    6790 data
REM    477 parameters refined using      0 restraints

END

WGHT      0.0660      0.8615

REM Instructions for potential hydrogen bonds
HTAB N1 O006
EQIV $1 x-1, y, z
HTAB N00I O3_$1
HTAB C015 O006
EQIV $2 x-1/2, -y+1/2, -z+1
HTAB C016 O00A_$2

REM Highest difference peak  0.345,  deepest hole -0.362,  1-sigma level  0.052
Q1    1   0.0935  0.3601  0.3646  11.00000  0.05    0.34
Q2    1  -0.0390  0.5892  0.0809  11.00000  0.05    0.28
Q3    1  -0.0739  0.4651  0.0895  11.00000  0.05    0.28
Q4    1   0.7177  0.5781  0.3779  11.00000  0.05    0.26
Q5    1   0.1278  0.3406  0.4598  11.00000  0.05    0.22
Q6    1   0.6121  0.4943  0.2691  11.00000  0.05    0.21
Q7    1   0.6365  0.4852  0.2627  11.00000  0.05    0.21
Q8    1   0.0728  0.3946  0.4490  11.00000  0.05    0.21
Q9    1  -0.0426  0.4731  0.0405  11.00000  0.05    0.19
Q10   1   0.0079  0.5799  0.0040  11.00000  0.05    0.19
Q11   1   0.5812  0.4663  0.2599  11.00000  0.05    0.18
Q12   1   0.1649  0.5830  0.4041  11.00000  0.05    0.18
Q13   1   0.5624  0.3801  0.2880  11.00000  0.05    0.17
Q14   1   0.1588  0.3129  0.5013  11.00000  0.05    0.17
Q15   1   0.0850  0.2744  0.2540  11.00000  0.05    0.17
Q16   1   0.0912  0.4580  0.3777  11.00000  0.05    0.16
Q17   1   0.2364  0.6214  0.0672  11.00000  0.05    0.16
Q18   1   0.6414  0.4776  0.3461  11.00000  0.05    0.16
Q19   1   0.0559  0.4387  0.3276  11.00000  0.05    0.16
Q20   1   0.5983  0.5789  0.3836  11.00000  0.05    0.16
;
_shelx_res_checksum               52811
_shelx_hkl_file
;
   0   0  -2  681.62    8.43
   0   0  -2  652.16    7.77
   0   0  -3    0.13    0.09
   0   0  -3    0.21    0.15
   0   0  -4  135.85    3.23
   0   0  -4  129.95    2.45
   0   0  -5    1.77    0.30
   0   0  -5    0.24    0.35
   0   0  -6  724.46   11.30
   0   0  -7    2.85    0.43
   0   0  -7    2.90    0.67
   0   0  -8  296.86    5.25
   0   0  -8  346.98    7.50
   0   0  -9    1.01    0.59
   0   0 -10 3723.61   47.52
   0   0 -11    2.17    0.75
   0   0 -12   27.15    2.56
   0   0 -13    2.97    1.06
   0   0 -14  163.96    7.16
   0   0 -15    0.95    0.90
   0   0 -15   -0.27    1.45
   0   0 -16    2.85    2.06
   0   0 -17   -1.02    1.48
   0   0 -18   10.40    2.81
   0   0 -19   -0.88    1.63
   0   0 -20   58.52    5.84
   0   0 -21    0.51    1.27
   0   0 -22  134.01    8.32
   0   0 -23   -1.80    1.44
   0   0 -24    4.83    1.68
   0   0 -25    1.40    1.09
   0  -1  -2  844.75   10.22
   0  -1  -2  834.43   10.56
   0  -1  -3  623.98    8.49
   0  -1  -3  629.20    8.54
   0  -1  -4 1303.33   16.66
   0  -1  -4 1353.03   16.55
   0  -1  -5 2023.34   24.66
   0  -1  -5 1982.35   24.15
   0  -1  -6 7127.37   79.55
   0  -1  -6 7104.14   80.51
   0  -1  -7 2694.20   32.56
   0  -1  -7 2702.15   33.82
   0   1  -7 2751.28   34.20
   0  -1  -8 2522.59   31.37
   0  -1  -8 2561.78   33.02
   0   1  -9 1449.96   21.70
   0  -1  -9 1471.16   21.63
   0  -1  -9 1448.84   19.54
   0   1 -10   49.32    3.04
   0  -1 -10   42.68    2.79
   0   1 -11    9.17    1.52
   0  -1 -11    8.43    1.37
   0  -1 -12  345.82    9.61
   0   1 -12  341.00    9.73
   0  -1 -13  228.10    8.11
   0   1 -13  242.01    8.38
   0   1 -14  365.80   11.16
   0  -1 -14  372.56   11.12
   0  -1 -15    9.07    2.17
   0   1 -15    9.46    1.87
   0   1 -15    7.92    2.39
   0  -1 -16  285.53   12.88
   0   1 -16  286.81   12.86
   0  -1 -17  223.84   11.62
   0   1 -17  227.51   11.50
   0   1 -18   19.83    3.60
   0  -1 -18   17.36    3.40
   0  -1 -19   54.45    5.72
   0   1 -19   55.64    5.71
   0   1 -20   11.70    2.89
   0  -1 -20    9.57    2.60
   0   1 -21    3.95    1.80
   0  -1 -21    3.05    1.67
   0  -1 -22   68.47    5.94
   0   1 -22   61.76    5.66
   0  -1 -23   12.26    2.56
   0   1 -23   11.94    2.60
   0   1 -24   -0.74    0.99
   0  -1 -24    1.26    1.03
   0  -1 -25    6.68    1.87
   0  -2   0 2477.96   28.56
   0  -2  -1 2763.00   31.75
   0  -2   1 2737.61   31.17
   0  -2   2 2659.21   29.74
   0  -2  -2 2628.43   31.02
   0  -2  -3  137.78    3.36
   0   2  -3  134.95    3.24
   0  -2  -3  141.65    2.85
   0  -2   3  130.51    2.18
   0  -2  -4  476.49    7.81
   0  -2  -4  471.02    7.21
   0  -2  -5  905.57   12.58
   0  -2  -5  900.60   13.04
   0  -2  -6 1682.77   21.80
   0  -2  -6 1677.57   22.00
   0  -2  -7    4.48    0.80
   0  -2  -7    4.29    0.76
   0   2  -7    5.35    0.91
   0  -2  -8  120.88    3.97
   0  -2  -8  120.85    4.14
   0   2  -8  121.73    4.35
   0  -2  -9 2102.69   28.18
   0   2  -9 2180.14   29.54
   0  -2  -9 2125.71   28.91
   0  -2 -10  386.64    9.22
   0   2 -10  404.05    9.65
   0  -2 -11    1.54    0.78
   0   2 -11    2.61    0.91
   0  -2 -12  336.97    9.42
   0   2 -12  333.29    9.67
   0   2 -13   47.99    3.71
   0   2 -14    5.16    1.36
   0  -2 -15  273.74   12.68
   0   2 -15  287.74   12.46
   0   2 -15  256.20    9.85
   0   2 -16  199.25    9.03
   0   2 -16  228.11   11.25
   0  -2 -16  221.63   11.50
   0  -2 -17   95.23    7.68
   0   2 -17   99.26    7.55
   0   2 -18    9.75    2.67
   0  -2 -18    5.39    2.05
   0   2 -19   71.80    6.53
   0  -2 -19   62.68    6.36
   0  -2 -20  139.19    9.11
   0   2 -20  161.62    9.61
   0   2 -21    0.90    1.26
   0  -2 -21    1.84    1.38
   0  -2 -22   14.13    2.73
   0   2 -22   15.38    3.15
   0   2 -23   13.56    2.71
   0  -2 -23   13.05    2.61
   0  -2 -24   13.85    2.46
   0  -2 -25   56.79    4.12
   0  -3   0    3.75    0.61
   0  -3   1 4395.08   50.03
   0  -3  -1 4437.06   50.66
   0  -3   2 2929.40   33.85
   0  -3  -2 2942.03   35.09
   0  -3   3   45.46    1.52
   0  -3  -3   46.70    2.12
   0  -3  -4  289.57    6.08
   0  -3   4  268.64    4.25
   0   3  -4  280.30    5.76
   0  -3  -5  641.17   10.84
   0   3  -5  656.97   10.67
   0   3  -6  354.52    7.44
   0  -3  -6  344.83    7.43
   0   3  -7  847.77   13.97
   0  -3  -7  842.17   13.89
   0  -3  -8  785.39   13.82
   0   3  -8  818.14   14.20
   0   3  -9  830.70   14.75
   0  -3  -9  792.53   14.14
   0  -3 -10  713.47   13.57
   0   3 -10  744.54   14.28
   0   3 -11 1119.15   19.76
   0   3 -12  407.19   11.00
   0   3 -13   40.58    3.42
   0   3 -14  967.06   20.34
   0  -3 -15   85.55    4.53
   0  -3 -15   89.98    7.27
   0   3 -15   83.22    6.64
   0   3 -15   88.64    5.72
   0  -3 -16   17.62    3.46
   0  -3 -16   17.76    2.05
   0   3 -16   20.42    3.59
   0   3 -16   26.86    3.30
   0   3 -17   72.76    5.68
   0   3 -17   74.34    6.75
   0  -3 -17   66.73    6.54
   0  -3 -17   69.49    4.30
   0   3 -18    0.42    1.24
   0  -3 -18    4.27    1.19
   0  -3 -18   -0.17    1.49
   0   3 -19    4.84    2.07
   0  -3 -19    5.51    2.19
   0   3 -20   21.49    3.64
   0  -3 -20   18.52    3.57
   0  -3 -21    1.01    1.50
   0   3 -21    0.38    1.43
   0   3 -22    1.82    1.47
   0  -3 -22   -1.57    1.60
   0   3 -23    5.82    1.81
   0  -3 -23    5.18    1.75
   0  -3 -24  101.81    6.09
   0  -3 -25    9.03    1.70
   0  -4   0 8561.65   95.99
   0  -4   1  144.76    3.84
   0  -4  -1  143.66    4.09
   0  -4   2   24.34    1.48
   0  -4  -2   25.93    1.79
   0  -4   3 4331.33   49.69
   0  -4  -3 4371.30   51.67
   0   4  -3 4329.00   50.31
   0   4  -4   65.34    2.63
   0  -4  -4   64.91    2.94
   0  -4   4   64.88    2.11
   0   4  -5 1491.67   20.22
   0  -4  -5 1505.48   21.08
   0  -4  -6  432.72    9.19
   0   4  -6  423.77    8.65
   0   4  -7 1114.09   17.38
   0  -4  -7 1114.20   17.81
   0  -4  -8 1255.09   19.85
   0   4  -8 1243.30   19.51
   0   4  -9  524.92   11.27
   0  -4  -9  520.90   11.34
   0   4 -10   52.09    3.34
   0  -4 -10   50.79    3.34
   0  -4 -11   38.11    3.04
   0   4 -11   44.31    3.29
   0   4 -12   35.28    3.11
   0   4 -13  102.04    5.61
   0   4 -14   31.17    4.13
   0   4 -14   29.42    3.17
   0   4 -15    1.66    1.24
   0  -4 -15    0.15    0.67
   0   4 -15    2.58    1.80
   0  -4 -15   -0.42    1.40
   0  -4 -16  161.49   10.24
   0   4 -16  163.26    8.31
   0   4 -16  168.29    9.93
   0  -4 -16  174.48    6.93
   0  -4 -17   42.67    5.45
   0  -4 -17   46.48    3.60
   0   4 -17   45.78    5.36
   0   4 -17   41.38    4.30
   0   4 -18   38.90    4.93
   0  -4 -18   39.74    3.42
   0  -4 -18   36.05    5.03
   0   4 -19   41.41    5.20
   0  -4 -19   45.18    3.71
   0  -4 -19   39.03    5.10
   0  -4 -20   77.90    6.88
   0   4 -20   92.45    7.40
   0  -4 -20   79.29    4.87
   0   4 -21   35.06    4.52
   0  -4 -21   33.09    4.35
   0  -4 -22   43.35    4.80
   0   4 -22   45.83    4.84
   0  -4 -23   56.94    4.97
   0  -4 -24   98.76    5.87
   0  -4 -25   79.72    4.64
   0  -5   0    2.89    0.79
   0  -5  -1 2140.93   28.42
   0  -5   1 2162.34   27.85
   0  -5  -2   40.43    2.40
   0  -5   2   41.71    2.13
   0  -5  -3  515.17   10.32
   0  -5   3  542.92    9.24
   0   5  -3  540.66    9.25
   0   5  -4  824.62   13.15
   0  -5  -4  852.31   14.54
   0  -5   4  861.21   12.56
   0   5  -5 1657.83   22.62
   0  -5   5 1625.98   20.75
   0  -5  -5 1641.20   23.91
   0   5  -6  177.40    5.31
   0  -5  -6  180.39    5.94
   0   5  -7  709.26   12.87
   0  -5  -7  693.71   13.63
   0  -5  -8  376.14    9.59
   0   5  -8  376.23    9.01
   0   5  -9    3.69    0.99
   0  -5  -9    3.46    0.98
   0  -5 -10   80.89    4.49
   0   5 -10   78.72    4.21
   0   5 -11   22.34    2.43
   0  -5 -11   31.55    2.91
   0   5 -12   74.60    4.61
   0   5 -13   13.13    2.10
   0   5 -14  404.97   12.61
   0   5 -14  425.94   15.59
   0  -5 -14  417.92   10.95
   0  -5 -14  407.12   16.47
   0   5 -15 1198.51   25.08
   0  -5 -15 1267.85   31.26
   0   5 -15 1249.00   29.43
   0  -5 -15 1258.08   22.33
   0   5 -16   -0.31    1.29
   0  -5 -16    0.83    0.82
   0   5 -16   -0.33    1.20
   0  -5 -16    1.49    1.53
   0  -5 -17    3.00    0.92
   0  -5 -17   -0.20    1.36
   0   5 -17    2.26    1.62
   0  -5 -18   25.00    2.84
   0  -5 -18   23.73    4.09
   0   5 -18   21.57    4.22
   0  -5 -19  223.13    8.53
   0  -5 -19  232.14   12.25
   0   5 -19  244.84   12.66
   0  -5 -20   25.70    4.01
   0  -5 -20   26.09    2.90
   0   5 -20   25.44    4.17
   0  -5 -21    0.78    0.88
   0  -5 -21    1.91    1.57
   0  -5 -22    2.92    1.60
   0  -5 -23   76.21    5.73
   0  -5 -24    8.95    1.90
   0  -5 -25    0.51    0.73
   0  -6   0  103.82    4.05
   0  -6   1  344.53    7.76
   0  -6  -1  322.66    7.86
   0  -6   2   94.54    3.66
   0  -6  -2   94.60    4.04
   0   6  -3  142.30    4.19
   0  -6   3  141.16    4.45
   0  -6  -3  145.37    5.20
   0  -6   4    0.58    0.33
   0   6  -4    1.77    0.58
   0  -6   5  584.03    9.97
   0   6  -5  583.95   10.90
   0  -6  -5  593.10   12.42
   0  -6   6    2.73    0.43
   0  -6  -6    2.78    1.03
   0   6  -6    2.82    0.85
   0   6  -7 1450.18   22.09
   0  -6  -7 1487.18   23.94
   0  -6  -8   64.16    3.98
   0   6  -8   61.53    3.48
   0   6  -9    4.65    1.07
   0  -6  -9    0.80    0.68
   0  -6 -10  319.01    9.96
   0   6 -10  332.31    9.40
   0   6 -11  918.16   18.24
   0  -6 -11  899.62   18.95
   0   6 -12  990.14   20.02
   0   6 -13  985.67   25.03
   0   6 -13 1068.32   21.59
   0   6 -14    1.02    1.28
   0   6 -14    1.37    1.08
   0  -6 -14    1.31    1.80
   0  -6 -14    1.56    1.01
   0   6 -15  248.79   10.26
   0  -6 -15  255.38   13.55
   0   6 -15  251.22   12.40
   0  -6 -15  255.56    8.82
   0  -6 -16   33.23    3.20
   0  -6 -16   28.56    4.60
   0   6 -16   25.95    3.44
   0   6 -16   29.63    4.64
   0   6 -17   90.48    7.99
   0  -6 -17   85.62    5.23
   0  -6 -17   74.17    7.32
   0   6 -18   90.98    7.86
   0  -6 -18   87.42    7.74
   0  -6 -18   85.57    5.31
   0  -6 -19   52.91    4.20
   0  -6 -19   49.99    5.77
   0   6 -19   62.89    6.49
   0  -6 -20   44.12    3.89
   0  -6 -20   51.87    5.68
   0  -6 -21  211.40   10.79
   0  -6 -21  193.07    8.01
   0  -6 -22  173.24    9.13
   0  -6 -22  161.59    6.92
   0  -6 -23   10.42    2.15
   0  -6 -24   57.81    4.15
   0  -7   0    0.28    0.51
   0  -7  -1  964.93   16.81
   0  -7   1  959.70   16.35
   0  -7  -2  484.23   10.98
   0  -7   2  477.50   10.18
   0   7  -2  507.65    9.02
   0  -7  -3  503.74   11.42
   0  -7   3  512.61   10.45
   0   7  -3  511.75    9.49
   0  -7   4  374.81    8.38
   0  -7  -4  376.26    9.86
   0   7  -4  377.33    8.13
   0  -7   5  396.12    8.39
   0  -7  -5  394.65   10.33
   0   7  -5  381.44    8.63
   0   7  -6 2281.76   31.38
   0  -7   6 2303.91   29.64
   0  -7  -6 2346.90   34.21
   0  -7  -7 1275.59   22.57
   0   7  -7 1260.25   20.34
   0   7  -8  165.63    6.08
   0  -7  -8  168.66    7.01
   0  -7  -9   17.27    2.36
   0   7  -9   15.95    1.96
   0   7 -10   10.26    1.76
   0  -7 -10    8.50    1.76
   0  -7 -11  602.51   15.72
   0   7 -11  621.32   14.70
   0   7 -12   17.50    2.45
   0  -7 -12   17.09    2.67
   0  -7 -13  128.82    6.00
   0   7 -13  111.49    7.98
   0   7 -13  122.27    6.65
   0   7 -14   20.51    3.73
   0   7 -14   22.71    3.04
   0  -7 -14   21.55    2.55
   0   7 -15    6.16    2.30
   0  -7 -15    2.00    1.75
   0   7 -15    4.85    1.56
   0  -7 -15    9.09    1.76
   0  -7 -16   12.69    2.11
   0  -7 -16   14.04    3.57
   0   7 -16   14.80    3.62
   0  -7 -17  319.63   15.53
   0  -7 -17  314.14   10.76
   0  -7 -18    8.11    1.90
   0  -7 -18    5.36    2.26
   0  -7 -19    7.70    1.81
   0  -7 -19   12.46    3.19
   0  -7 -20   59.35    6.01
   0  -7 -20   51.14    4.21
   0  -7 -21   -0.15    1.21
   0  -7 -21    0.69    1.07
   0  -7 -22   68.25    5.57
   0  -7 -22   66.84    4.42
   0  -7 -23   32.96    3.48
   0  -7 -24  165.79    6.74
   0  -8   0    9.67    1.62
   0   8   0   13.50    1.07
   0  -8   1  710.02   14.23
   0  -8  -1  703.55   14.57
   0   8  -1  716.43   11.31
   0  -8   2   56.77    3.41
   0  -8  -2   48.70    3.43
   0   8  -2   55.51    2.60
   0  -8   3  917.71   16.39
   0   8  -3  921.82   14.72
   0  -8  -3  930.47   17.93
   0  -8   4  112.72    4.66
   0  -8  -4  115.42    5.61
   0   8  -4  114.64    4.29
   0  -8  -5  205.94    7.66
   0   8  -5  204.84    6.17
   0  -8   5  205.55    6.19
   0   8  -6  170.40    5.84
   0  -8  -6  179.96    7.33
   0  -8  -7    7.52    1.87
   0   8  -7   10.79    1.54
   0  -8  -8  213.55    8.50
   0   8  -8  207.78    7.09
   0   8  -9  666.13   14.57
   0  -8  -9  678.03   16.68
   0   8 -10    5.85    1.43
   0  -8 -10    4.98    1.58
   0   8 -11   39.58    3.53
   0  -8 -11   39.23    3.98
   0  -8 -12   66.15    5.32
   0  -8 -12   73.82    4.58
   0   8 -12   67.02    4.81
   0  -8 -13  104.11    5.62
   0   8 -13   94.28    5.96
   0   8 -14  134.69    7.44
   0  -8 -14  139.35    6.74
   0  -8 -15   77.45    7.83
   0  -8 -15   80.61    5.26
   0   8 -15   69.25    5.52
   0  -8 -16  479.41   13.70
   0  -8 -16  466.05   19.36
   0  -8 -17    2.34    1.21
   0  -8 -17   -1.28    2.01
   0  -8 -18    0.68    0.86
   0  -8 -18    0.78    1.40
   0  -8 -19  124.61    9.05
   0  -8 -19  125.61    6.84
   0  -8 -20   24.98    3.97
   0  -8 -20   27.00    3.25
   0  -8 -21    6.74    1.64
   0  -8 -21    2.89    1.36
   0  -8 -22   -2.60    1.42
   0  -8 -23    1.27    1.03
   0  -9   0    0.43    0.72
   0  -9   1    0.84    0.93
   0  -9  -1    1.11    0.90
   0   9  -2 1347.27   19.11
   0  -9   2 1288.18   22.24
   0  -9  -2 1307.43   23.46
   0  -9   3  188.50    6.76
   0   9  -3  194.63    5.61
   0  -9  -3  187.53    7.50
   0  -9   4  255.61    7.83
   0   9  -4  254.63    6.90
   0  -9  -4  261.28    9.10
   0  -9  -5  222.60    8.54
   0   9  -5  209.25    6.49
   0  -9   5  221.07    6.96
   0  -9  -6 1163.34   22.86
   0   9  -6 1154.53   19.46
   0   9  -7   40.88    3.03
   0  -9  -7   41.20    3.85
   0  -9  -8  293.33   10.73
   0   9  -8  293.36    8.89
   0  -9  -9   24.17    3.14
   0   9  -9   29.59    2.86
   0  -9 -10   99.32    6.52
   0   9 -10   95.73    5.40
   0   9 -11  256.21    9.40
   0  -9 -11  250.91   10.79
   0  -9 -11  263.68    9.05
   0  -9 -12   55.44    5.18
   0   9 -12   54.74    4.46
   0  -9 -12   58.39    4.29
   0  -9 -13   31.68    3.32
   0   9 -13   30.46    3.48
   0  -9 -13   31.19    4.12
   0  -9 -14  242.23    9.38
   0   9 -14  223.04    9.85
   0  -9 -15  129.34    6.90
   0  -9 -15  138.13   10.54
   0  -9 -16    0.38    2.23
   0  -9 -16    3.97    1.38
   0  -9 -17   48.34    4.35
   0  -9 -17   57.26    6.64
   0  -9 -18    0.50    0.96
   0  -9 -18   -0.26    1.68
   0  -9 -19    9.66    2.00
   0  -9 -19    9.27    2.65
   0  -9 -20   78.66    6.65
   0  -9 -20   75.59    5.16
   0  -9 -21  191.38    9.59
   0  -9 -21  176.28    7.58
   0  -9 -22   62.70    4.87
   0  -9 -23    9.60    1.79
   0 -10   0  819.45   17.75
   0 -10  -1   81.45    5.04
   0 -10   1   78.98    4.84
   0 -10  -2   46.59    3.89
   0 -10   2   50.72    3.78
   0 -10   3  164.73    6.77
   0 -10  -3  160.87    7.46
   0 -10   4  345.09    9.92
   0 -10  -4  348.91   11.37
   0  10  -5  222.73    6.92
   0 -10  -5  224.58    9.20
   0  10  -6  948.07   17.34
   0 -10  -6  941.05   21.11
   0  10  -7  452.10   11.30
   0 -10  -7  457.46   14.21
   0 -10  -8   48.12    4.52
   0  10  -8   47.09    3.54
   0 -10  -9  202.83    9.58
   0  10  -9  191.87    7.64
   0  10  10  256.87    8.75
   0  10 -10  253.48    9.25
   0 -10 -10  252.60   11.09
   0 -10 -10  238.34    8.93
   0  10 -11   48.68    4.13
   0 -10 -11   48.82    4.04
   0 -10 -11   44.70    4.82
   0  10  11   42.59    3.68
   0 -10 -12    6.54    1.64
   0  10  12    3.96    1.41
   0  10 -12    5.25    1.73
   0 -10 -13    6.53    1.67
   0 -10 -13    7.64    2.44
   0 -10 -14  119.71    6.76
   0 -10 -15   18.94    3.91
   0 -10 -15   22.11    3.09
   0 -10 -16   33.81    3.74
   0 -10 -16   32.82    5.23
   0 -10 -17    6.86    2.83
   0 -10 -17    6.60    1.80
   0 -10 -18   67.23    5.26
   0 -10 -18   60.19    6.44
   0 -10 -19   40.33    5.02
   0 -10 -19   33.76    3.58
   0 -10 -20   58.17    5.55
   0 -10 -20   52.39    4.20
   0 -10 -21    2.19    1.34
   0 -10 -22    6.19    1.61
   0 -11   0    1.45    0.94
   0 -11  -1   99.08    5.96
   0 -11   1   90.42    5.55
   0 -11  -2   -0.18    0.98
   0 -11   2    1.47    1.02
   0 -11  -3   38.06    3.81
   0 -11   3   36.41    3.41
   0 -11   4    3.45    1.19
   0 -11  -4    6.96    1.84
   0 -11  -5  286.53   11.08
   0 -11  -6   16.43    2.77
   0 -11  -7   66.42    5.44
   0  11   8   36.59    3.21
   0 -11  -8   40.50    3.66
   0 -11  -8   34.06    3.98
   0 -11  -9  119.44    7.76
   0  11   9  118.97    5.99
   0 -11  -9  117.46    6.34
   0 -11 -10    3.50    1.43
   0  11  10    1.67    1.09
   0 -11 -11  130.06    6.98
   0 -11 -11  137.16    8.86
   0  11  11  127.52    6.46
   0  11 -11  125.73    6.81
   0  11  12    0.06    1.19
   0  11 -12    0.14    1.34
   0 -11 -12    2.40    1.31
   0  11  13  167.07    7.55
   0 -11 -13  143.24    7.68
   0 -11 -14    3.55    1.61
   0 -11 -15   72.91    5.59
   0 -11 -16   43.65    5.98
   0 -11 -16   39.81    4.17
   0 -11 -17  152.13    8.14
   0 -11 -17  150.98   10.53
   0 -11 -18   13.55    3.20
   0 -11 -18    9.18    2.21
   0 -11 -19   28.46    3.31
   0 -11 -19   30.71    4.22
   0 -11 -20   10.05    2.29
   0 -11 -21   -0.71    0.97
   0 -11 -22   17.31    2.19
   0 -12   0   96.52    6.13
   0 -12   1   63.84    4.94
   0 -12  -1   70.51    5.33
   0 -12  -2   44.15    4.36
   0 -12   2   48.39    4.29
   0 -12  -3  446.66   14.40
   0 -12   3  428.83   12.99
   0 -12  -4  126.39    7.48
   0 -12  -5    2.99    1.41
   0  12   5    4.66    1.28
   0  12   6   21.47    2.52
   0 -12  -6   19.24    2.79
   0 -12  -6   18.61    3.09
   0  12   7  223.11    8.37
   0 -12  -7  232.10   10.96
   0 -12  -7  220.22    9.09
   0 -12  -8  247.96    9.80
   0  12   8  247.21    8.96
   0 -12  -8  273.32   12.28
   0 -12  -9  115.00    6.76
   0 -12  -9  126.32    8.44
   0  12   9  121.45    6.28
   0 -12 -10   95.02    7.46
   0 -12 -10   92.27    6.10
   0  12  10   97.83    5.71
   0 -12 -11   16.00    2.68
   0  12  11   14.55    2.30
   0  12  12  231.28    9.09
   0 -12 -12  228.05   10.04
   0 -12 -13   91.01    6.37
   0  12  13   92.45    5.72
   0 -12 -14   12.41    2.56
   0 -12 -15   28.04    3.80
   0 -12 -16  123.40    9.79
   0 -12 -16  118.37    7.22
   0 -12 -17   48.99    5.93
   0 -12 -17   55.05    4.82
   0 -12 -18   10.66    2.78
   0 -12 -19   89.36    6.68
   0 -12 -20    3.57    1.42
   0 -12 -21    6.26    1.44
   0  13   0   -0.42    0.94
   0 -13   0    2.42    1.28
   0  13  -1    1.41    0.86
   0 -13   1    0.54    1.10
   0 -13  -1    2.38    1.55
   0  13   1    2.36    1.27
   0  13  -2  203.56    7.98
   0 -13   2  219.83    9.66
   0 -13  -2  206.48    9.96
   0  13   2  205.62    8.11
   0  13   3   74.77    4.84
   0 -13  -3   80.52    6.25
   0  13   4    4.05    1.29
   0 -13  -4    3.42    1.61
   0 -13  -5    2.64    1.12
   0  13   5    1.19    0.86
   0  13   6   95.69    5.48
   0 -13  -6   82.23    5.76
   0 -13  -6  100.61    7.43
   0 -13  -7  342.71   14.14
   0  13   7  335.69   10.82
   0 -13  -7  326.41   11.74
   0 -13  -8   69.73    5.56
   0  13   8   77.21    5.08
   0 -13  -8   72.71    6.58
   0  13   9   85.42    5.38
   0 -13  -9   86.64    7.32
   0 -13  -9   84.53    5.99
   0  13  10  226.65    9.03
   0 -13 -10  229.37   10.14
   0 -13 -11  192.70    9.54
   0  13  11  206.19    8.68
   0 -13 -12    0.09    1.15
   0  13  12    0.47    1.23
   0  13  13    7.57    1.88
   0 -13 -13    4.71    1.89
   0  13  14   14.15    2.39
   0 -13 -14   11.05    2.57
   0 -13 -15    2.65    1.56
   0 -13 -15    3.31    2.55
   0 -13 -16   16.53    2.87
   0 -13 -16   13.75    3.48
   0 -13 -17    1.29    1.50
   0 -13 -18   -1.21    1.62
   0 -13 -19   64.44    5.23
   0 -13 -20    1.09    0.94
   0  14   0    5.49    1.74
   0 -14   0    3.37    1.88
   0 -14  -1  278.41   12.05
   0 -14   1  258.92   11.30
   0  14   1  270.84    9.64
   0  14  -1  250.31    9.38
   0  14   2    0.22    0.93
   0 -14   2    0.12    1.83
   0 -14  -2    2.34    1.97
   0  14  -2    0.75    1.07
   0  14  -3    6.05    1.61
   0  14   3    5.30    1.49
   0 -14  -3    5.38    2.13
   0  14   4   28.68    3.15
   0 -14  -4   25.07    3.92
   0  14   5   26.29    3.07
   0 -14  -5   28.82    4.17
   0  14   6   50.66    4.20
   0 -14  -6   52.30    5.60
   0 -14  -7   32.17    4.45
   0  14   7   40.19    3.77
   0 -14  -8  238.31   11.57
   0  14   8  205.88    8.63
   0  14   9   23.26    2.96
   0  14  10    5.56    1.60
   0 -14 -10    3.64    1.38
   0 -14 -11    0.59    1.13
   0  14  11    0.64    1.12
   0  14  12    4.45    1.60
   0 -14 -12    1.63    1.27
   0  14  13   53.56    4.40
   0  14  14  196.73    8.18
   0 -14 -15  273.78   14.32
   0 -14 -16   55.35    5.98
   0 -14 -17   81.29    6.71
   0 -14 -18   70.52    5.54
   0 -14 -19    1.53    0.97
   0 -15   0    1.39    1.92
   0  15   0    2.95    1.65
   0 -15  -1  368.90   14.72
   0  15  -1  362.39   11.67
   0  15   1  359.80   11.76
   0  15  -2   24.27    3.06
   0 -15  -2   15.27    3.17
   0  15   2   25.45    3.12
   0 -15  -3    2.96    2.03
   0  15  -3    2.83    1.38
   0  15   3    4.88    1.69
   0  15   4  194.30    8.44
   0  15   5  100.29    6.09
   0  15   6   97.35    5.93
   0  15   7   15.81    2.50
   0 -15  -8    7.40    2.44
   0  15   8    7.64    1.90
   0  15   9  286.18   10.38
   0  15  10   21.67    2.96
   0  15  11   65.79    4.86
   0  15  12   15.07    2.43
   0  15  13    7.62    1.81
   0  15  14    8.01    1.69
   0 -15 -15  302.20   14.12
   0 -15 -16   -0.48    1.31
   0 -15 -17   13.53    2.59
   0 -15 -18    2.40    1.18
   0  16   0    3.38    1.36
   0  16   1   19.37    2.85
   0  16  -1   18.04    2.62
   0  16  -2   58.24    4.56
   0  16   2   59.82    4.76
   0  16   3   14.91    2.51
   0  16  -3   11.80    2.17
   0  16   4    8.93    2.11
   0  16   5  137.66    7.16
   0  16   6  148.18    7.45
   0 -16  -7    1.84    1.42
   0  16   7    2.73    1.50
   0 -16  -8   29.36    4.22
   0  16   8   29.84    3.32
   0  16   9  138.85    7.10
   0  16  10   43.64    4.04
   0  16  11   28.01    3.22
   0  16  12    0.95    1.01
   0  16  13   39.97    3.53
   0 -16 -14    2.05    1.68
   0  16  14    2.57    1.19
   0 -16 -15    0.71    1.56
   0 -16 -16  117.71    7.14
   0 -16 -17    0.69    0.87
   0  17   0   -0.12    1.31
   0  17  -1   29.29    3.35
   0  17   1   33.02    3.60
   0  17   2    2.05    1.10
   0  17  -2   -0.98    1.19
   0  17  -3    2.32    1.14
   0  17   3    4.01    1.75
   0  17   4   91.04    5.82
   0  17   5    1.06    1.17
   0 -17  -6   17.76    3.45
   0  17   6   14.26    2.41
   0 -17  -7   17.06    3.17
   0  17   7   16.28    2.49
   0  17   8   26.44    3.13
   0 -17  -8   24.46    3.77
   0  17   9   10.23    2.04
   0  17  10   76.09    5.00
   0  17  11   59.78    4.30
   0  17  12   24.20    2.72
   0  17  13    0.85    0.95
   0 -17 -14   72.07    6.01
   0  17  14  106.97    4.96
   0 -17 -15    1.28    1.33
   0 -17 -16    7.59    1.73
   0  18   0   56.79    4.54
   0  18   1    0.69    1.24
   0  18  -1   -0.26    1.07
   0  18  -2   42.44    3.71
   0  18   2   51.83    4.38
   0  18   3   41.33    3.94
   0 -18  -4    1.52    1.75
   0  18   4    0.88    1.03
   0  18   5    3.52    1.31
   0 -18  -5    5.57    2.07
   0 -18  -6   15.61    3.02
   0  18   6   13.20    2.29
   0 -18  -7   10.45    2.40
   0  18   7    9.51    1.92
   0 -18  -8    2.57    1.45
   0  18   8    3.08    1.41
   0  18   9   98.42    5.46
   0  18  10   21.94    2.65
   0  18  11   44.99    3.49
   0  18  12   13.34    1.85
   0 -18 -13   22.71    3.21
   0 -18 -14   12.22    2.29
   0  19   0   -0.61    0.93
   0  19   1   14.76    2.22
   0  19   2  119.06    6.26
   0 -19  -2  126.76    8.30
   0  19   3    1.85    1.12
   0 -19  -3    2.57    1.74
   0 -19  -4   -0.38    1.16
   0  19   4   -0.58    1.15
   0 -19  -5   13.09    2.84
   0  19   5    8.47    1.68
   0 -19  -6    0.30    1.04
   0  19   6    0.23    1.00
   0  19   7    1.99    1.13
   0 -19  -7    4.95    1.59
   0  19   8   24.63    2.67
   0 -19  -8   26.22    3.11
   0 -19   8   21.97    2.93
   0 -19   9   11.46    2.14
   0  19   9   17.01    2.18
   0  19  10   53.42    3.61
   0  19  11    3.34    1.15
   0 -19 -12   21.19    2.85
   0 -20   0  268.85   11.53
   0 -20  -1   10.64    2.63
   0 -20   1   13.99    2.97
   0 -20   2   12.33    2.68
   0 -20  -2   12.99    2.74
   0 -20   3   21.06    3.18
   0 -20  -3   25.23    3.55
   0  20   3   19.78    2.41
   0 -20  -4    1.11    1.29
   0  20   4   -0.65    0.89
   0 -20   4    1.56    1.26
   0 -20  -5   38.15    3.96
   0  20   5   37.07    3.18
   0 -20   5   34.10    3.78
   0  20   6    0.75    0.84
   0 -20   6    0.90    0.86
   0 -20  -7   -0.53    0.86
   0 -20   7    0.71    0.77
   0  20   7   -1.29    0.93
   0 -20   8    0.12    0.79
   0  20   8   -0.54    0.78
   0 -21   0   -0.15    0.97
   0 -21  -1   40.18    4.03
   0 -21   1   38.22    3.88
   0 -21  -2   87.49    5.74
   0 -21   2   77.57    5.45
   0 -21   3   16.67    2.63
   0 -21  -3   17.16    2.56
   0 -21   4   44.77    3.93
   0 -21  -4   44.05    3.85
   0 -21  -5    0.15    0.90
   0 -21   5    2.24    1.05
   0 -21   6    0.71    0.83
   0 -21  -6    1.89    0.85
   0 -22   0   35.51    3.22
   0 -22   1   68.01    4.37
   0 -22  -1   65.11    4.28
   0 -22  -2   68.64    4.26
   0 -22   2   65.05    4.22
   0 -22   3   24.19    2.52
   1   0   0    1.19    0.30
   1   0   1  319.49    5.23
   1   0  -1  317.09    5.39
   1   0   2  572.63    7.98
   1   0  -2  556.27    8.23
   1   0  -3 8411.53   92.99
   1   0  -4   55.45    2.05
   1   0  -5 8086.10   90.17
   1   0  -6 5417.54   62.00
   1   0  -6 5475.42   63.00
  -1   0  -7  465.18    9.08
   1   0  -7  429.94    7.72
  -1   0  -7  436.55    6.82
   1   0  -7  453.72    8.75
   1   0  -8  115.62    3.49
   1   0  -8  118.07    4.17
  -1   0  -8  126.22    2.98
  -1   0  -8  113.29    4.33
   1   0  -9 1238.68   18.69
  -1   0  -9 1226.50   19.19
   1   0 -10  654.08   12.71
  -1   0 -10  640.38   13.13
  -1   0 -11   78.92    4.27
   1   0 -11   78.00    4.05
   1   0 -12  224.82    7.57
   1   0 -13   70.57    4.39
   1   0 -14   51.58    3.94
   1   0 -15  275.93   11.97
   1   0 -15  263.01    9.68
  -1   0 -15  281.09   12.91
   1   0 -16   -0.86    1.88
   1   0 -16    2.30    0.99
  -1   0 -16    0.98    1.57
   1   0 -17  138.92    7.66
   1   0 -17  143.72    8.95
  -1   0 -17  151.31    9.77
   1   0 -18    0.99    1.37
  -1   0 -18   -0.34    1.85
   1   0 -19   57.79    5.66
  -1   0 -19   56.17    6.03
  -1   0 -20   -1.16    1.27
   1   0 -20    1.58    1.70
  -1   0 -21   -0.02    1.35
   1   0 -21   -0.93    1.68
   1   0 -22   -1.70    1.50
  -1   0 -22    0.77    1.18
  -1   0 -23    3.27    1.68
   1   0 -23    2.63    1.43
   1   0 -24   33.40    3.77
  -1   0 -24   28.17    3.62
  -1   0 -25  125.95    6.41
  -1  -1 -25   12.49    2.16
  -1  -1 -24   87.86    5.92
  -1  -1 -23   17.43    3.00
   1   1 -23   17.87    2.99
   1   1 -22    7.89    2.34
  -1  -1 -22    8.82    2.55
   1   1 -21    7.94    2.13
  -1  -1 -21    9.24    2.74
  -1  -1 -20   45.39    5.29
   1   1 -20   53.40    5.51
  -1  -1 -19   47.63    5.55
   1   1 -19   54.37    5.57
  -1  -1 -18   24.62    4.07
   1   1 -18   22.03    3.55
   1   1 -17  175.36    9.81
  -1  -1 -17  162.07   10.15
   1   1 -17  152.95    8.03
   1   1 -16   53.83    4.52
   1   1 -16   51.76    5.30
  -1  -1 -16   47.92    5.58
  -1  -1 -15  108.16    8.23
   1   1 -15  120.66    7.75
   1   1 -15  103.21    6.02
   1   1 -14  152.48    6.98
   1   1 -13  192.50    7.46
   1   1 -12   32.69    2.84
   1   1 -11  116.44    5.08
   1   1 -10  422.88    9.89
   1   1  -9 1184.20   18.70
  -1  -1  -9 1174.91   16.36
   1   1  -8  263.14    6.65
  -1  -1  -8  252.09    5.32
  -1  -1  -8  260.07    6.65
  -1  -1  -7   49.70    2.59
   1   1  -7   44.71    1.79
  -1  -1  -7   47.38    2.03
   1   1  -7   47.35    2.51
   1   1  -6 1864.93   24.70
   1   1  -6 1847.37   22.73
   1   1  -5   98.50    2.72
   1   1  -4  333.02    5.76
   1   1  -3  124.73    3.03
   1  -1   3  124.31    2.70
   1  -1   2  461.69    6.85
   1   1  -2  438.55    6.92
   1   1  -1  414.11    6.38
   1  -1   1  404.31    6.30
   1  -1   0  183.37    3.68
   1   1   0  177.13    3.53
   1  -1  -1  399.69    6.44
   1  -1  -2  431.44    6.99
   1  -1  -3  110.64    3.14
   1  -1  -4  312.45    6.07
   1  -1  -5   97.57    2.94
   1  -1  -5  103.34    3.24
   1  -1  -6 1890.17   24.31
   1  -1  -6 1924.99   24.56
   1  -1  -7   45.53    2.27
   1  -1  -7   43.24    2.21
  -1   1  -7   48.38    2.58
   1  -1  -8  251.32    6.09
  -1   1  -8  265.06    6.89
   1  -1  -8  258.78    6.31
  -1   1  -9 1170.65   18.67
   1  -1  -9 1136.10   17.73
   1  -1  -9 1123.90   17.01
   1  -1 -10  415.28    9.46
  -1   1 -10  424.74   10.16
   1  -1 -11  122.07    5.05
  -1   1 -11  117.23    5.25
  -1   1 -12   31.97    2.89
   1  -1 -12   32.32    2.74
  -1   1 -13  178.51    7.35
   1  -1 -13  184.60    7.12
   1  -1 -14  157.27    6.89
  -1   1 -15  118.30    8.22
   1  -1 -15  110.56    6.04
   1  -1 -15  116.05    7.77
   1  -1 -16   53.80    4.47
  -1   1 -16   64.83    6.28
   1  -1 -16   51.09    3.60
   1  -1 -16   54.10    5.43
   1  -1 -17  171.15    9.87
  -1   1 -17  167.20   10.15
   1  -1 -18   20.52    3.62
  -1   1 -18   20.47    3.69
   1  -1 -19   59.02    5.83
  -1   1 -19   52.17    5.60
  -1   1 -20   50.52    5.54
   1  -1 -20   46.10    5.06
   1  -1 -21   10.45    2.53
  -1   1 -21    7.26    2.39
   1  -1 -22   11.72    2.68
  -1   1 -22    8.58    2.38
  -1   1 -23   15.49    2.89
   1  -1 -23   15.79    2.70
  -1   1 -24   96.04    6.28
   1  -1 -24   87.32    5.49
  -1  -2 -25    1.64    1.07
  -1  -2 -24   13.96    2.48
   1   2 -23   19.87    3.04
  -1  -2 -23   18.50    3.03
  -1  -2 -22   72.06    6.31
   1   2 -22   74.91    6.01
   1   2 -21  125.96    8.22
  -1  -2 -21  112.22    8.03
  -1  -2 -20   20.99    3.75
   1   2 -20   16.89    3.31
   1   2 -19  171.46    9.84
  -1  -2 -19  156.27   10.01
  -1  -2 -18   69.85    6.78
   1   2 -18   70.05    6.23
   1   2 -17    8.46    2.04
  -1  -2 -17    7.05    2.42
   1   2 -17    8.13    2.19
   1   2 -16  511.34   15.00
   1   2 -16  554.63   17.65
  -1  -2 -16  502.43   18.29
  -1  -2 -15    4.72    2.00
   1   2 -15    1.93    1.11
   1   2 -14  611.67   15.29
   1   2 -13   45.12    3.59
   1   2 -12   16.80    2.11
   1   2 -11    0.92    0.68
   1   2 -10 1018.66   17.69
  -1  -2 -10 1001.52   15.76
   1   2  -9   58.72    3.27
  -1  -2  -9   61.35    2.84
   1   2  -8  166.17    5.38
  -1  -2  -8  167.23    4.74
  -1  -2  -7  492.72    9.02
   1   2  -7  508.91   10.03
   1  -2   4  521.45    7.40
   1  -2   3  655.24    9.17
   1  -2   2 1543.35   19.04
   1  -2   1 2989.51   34.81
   1  -2   0 1688.52   20.95
  -1   2  -2 1607.27   19.65
  -1   2  -3  665.02    9.92
   1  -2  -4  529.39    7.70
   1  -2  -5 1364.71   17.41
   1  -2  -6 1448.85   20.05
  -1   2  -6 1438.43   19.98
   1  -2  -7  501.28    9.67
  -1   2  -7  509.00    9.96
   1  -2  -7  487.50    8.75
   1  -2  -8  169.72    5.30
  -1   2  -8  179.32    5.62
   1  -2  -8  170.66    4.83
   1  -2  -9   63.78    3.09
  -1   2  -9   62.69    3.40
   1  -2  -9   64.11    3.28
   1  -2 -10 1039.99   17.04
   1  -2 -10 1007.81   16.89
  -1   2 -10 1026.72   18.08
  -1   2 -11    1.18    0.67
   1  -2 -11    1.40    0.66
  -1   2 -12   13.51    1.90
   1  -2 -12   14.63    1.81
   1  -2 -13   44.22    3.35
  -1   2 -13   45.50    3.67
   1  -2 -14  647.52   14.91
  -1   2 -14  584.77   15.11
   1  -2 -15    2.99    1.01
   1  -2 -15    1.89    0.93
   1  -2 -15    4.94    1.76
  -1   2 -15    2.45    1.85
   1  -2 -16  544.44   18.04
   1  -2 -16  526.69   12.89
  -1   2 -17    9.28    2.59
   1  -2 -17    4.25    1.82
  -1   2 -18   63.59    6.34
   1  -2 -18   67.82    6.26
   1  -2 -18   71.10    4.38
  -1   2 -19  161.61    9.98
   1  -2 -19  146.89    9.27
   1  -2 -19  162.74    6.67
   1  -2 -20   19.99    3.40
  -1   2 -20   22.78    3.88
  -1   2 -21  130.16    8.69
   1  -2 -21  114.98    7.79
  -1   2 -22   76.87    6.51
   1  -2 -22   79.72    6.13
  -1   2 -23   17.94    3.13
   1  -2 -23   15.89    2.63
  -1   2 -24   18.91    2.97
   1  -2 -24   14.42    2.29
   1  -2 -25    1.49    0.92
  -1  -3 -25    0.40    0.84
  -1  -3 -24   22.99    3.03
  -1  -3 -23    4.74    1.81
  -1  -3 -22   50.83    5.24
   1   3 -22   64.48    5.66
   1   3 -21   41.27    4.80
  -1  -3 -21   35.49    4.74
  -1  -3 -20   22.17    3.92
   1   3 -20   20.10    3.62
  -1  -3 -19    5.09    2.03
   1   3 -19    8.63    2.64
   1   3 -18   95.79    7.47
  -1  -3 -18   96.86    8.01
   1   3 -17  362.58   14.33
  -1  -3 -17  344.69   15.37
   1   3 -17  334.30   12.52
   1   3 -16   80.12    6.53
  -1  -3 -16   70.02    6.76
   1   3 -16   67.39    5.27
   1   3 -15  142.23    7.35
   1   3 -15  153.39    8.86
  -1  -3 -15  137.00    9.45
   1   3 -14  173.03    7.70
   1   3 -13   75.25    4.74
   1   3 -12  269.21    8.79
   1   3 -11  796.63   15.97
   1   3 -10   56.54    3.50
  -1  -3 -10   59.60    3.22
  -1  -3  -9  776.12   13.74
   1   3  -9  797.30   14.80
  -1  -3  -8  737.04   12.98
   1   3  -8  756.38   13.81
  -1  -3  -7   68.93    3.08
   1   3  -7   60.78    3.15
   1  -3   5 1434.34   17.35
   1  -3   4  318.34    5.58
   1  -3   3 3233.29   37.75
   1  -3   2 2730.27   32.54
   1  -3   0  122.81    3.50
  -1   3  -1 1156.65   14.26
   1  -3  -1 1138.68   15.99
   1  -3  -2 2722.26   33.47
  -1   3  -2 2718.43   31.80
   1  -3  -3 3336.69   39.73
  -1   3  -3 3415.97   38.39
  -1   3  -4  322.24    6.43
   1  -3  -4  318.10    4.94
   1  -3  -4  315.26    7.03
   1  -3  -5 1709.11   20.98
  -1   3  -5 1716.60   23.06
  -1   3  -6  148.02    4.59
   1  -3  -6  144.09    3.66
   1  -3  -6  153.35    4.92
  -1   3  -7   59.48    3.00
   1  -3  -7   55.36    2.37
   1  -3  -8  762.62   13.97
   1  -3  -8  747.31   12.26
  -1   3  -8  748.81   13.65
  -1   3  -9  807.43   14.96
   1  -3  -9  812.46   13.62
   1  -3  -9  801.79   14.98
   1  -3 -10   54.55    3.39
   1  -3 -10   59.52    3.16
  -1   3 -10   55.13    3.45
   1  -3 -11  811.26   15.01
  -1   3 -11  802.48   16.09
   1  -3 -11  809.80   15.64
   1  -3 -12  275.62    8.18
  -1   3 -12  261.36    8.73
   1  -3 -13   86.01    4.66
  -1   3 -13   79.20    4.94
  -1   3 -14  168.28    7.64
   1  -3 -15  134.44    8.62
   1  -3 -15  145.91    6.23
  -1   3 -15  147.71    9.27
   1  -3 -16   80.73    4.65
  -1   3 -16   89.27    7.36
   1  -3 -16   77.75    6.77
   1  -3 -17  369.27   10.60
   1  -3 -17  353.99   14.81
  -1   3 -17  354.97   15.08
  -1   3 -18  116.13    8.57
   1  -3 -18  103.06    7.83
   1  -3 -18  104.44    5.45
   1  -3 -19    6.35    1.46
   1  -3 -19    4.27    1.91
  -1   3 -19    7.99    2.67
  -1   3 -20   21.97    3.74
   1  -3 -20   24.71    2.61
   1  -3 -20   22.02    3.47
   1  -3 -21   38.15    4.50
  -1   3 -21   37.80    4.78
  -1   3 -22   58.42    5.73
   1  -3 -22   52.91    4.98
   1  -3 -23    4.39    1.58
  -1   3 -23    5.33    1.87
   1  -3 -24   18.26    2.50
  -1  -4 -25   12.09    1.93
  -1  -4 -24    2.62    1.37
  -1  -4 -23    7.24    2.02
  -1  -4 -22   35.76    4.36
  -1  -4 -21  130.69    8.72
   1   4 -21  143.53    8.67
   1   4 -20  154.00    9.36
  -1  -4 -20  129.63    9.09
  -1  -4 -19  316.84   14.72
   1   4 -19  335.07   14.15
  -1  -4 -18  120.06    6.17
   1   4 -18  141.12    9.15
  -1  -4 -18  129.40    9.45
   1   4 -17   78.64    6.85
  -1  -4 -17   73.67    7.19
  -1  -4 -17   75.31    4.75
   1   4 -17   75.25    5.85
   1   4 -16   50.53    4.66
  -1  -4 -16   49.01    3.66
  -1  -4 -16   45.15    5.67
   1   4 -16   51.31    5.32
   1   4 -15   31.27    3.57
  -1  -4 -15   31.31    4.64
  -1  -4 -15   34.43    3.02
   1   4 -15   36.14    4.26
  -1  -4 -14   49.07    5.74
   1   4 -14   64.98    4.77
   1   4 -13   62.29    4.40
   1   4 -12   79.20    4.72
  -1  -4 -11  766.15   15.26
   1   4 -11  788.80   16.09
  -1  -4 -10  170.17    6.11
   1   4 -10  175.99    6.47
  -1  -4  -9   96.12    4.34
   1   4  -9  101.25    4.63
   1   4  -8  659.40   12.94
  -1  -4  -8  638.38   12.53
   1   4  -7  250.82    7.00
  -1  -4  -7  245.94    6.77
  -1  -4  -6 1254.98   16.58
   1  -4   6  827.11   11.12
   1  -4   5  956.11   13.08
   1  -4   4   46.15    2.01
   1  -4   3  533.41    8.96
   1  -4   2  291.20    6.14
   1  -4   1 1324.53   18.37
   1  -4   0 4596.68   54.03
   1  -4  -1 1322.32   18.83
  -1   4  -1 1330.41   16.32
   1  -4  -2  292.58    6.80
  -1   4  -2  306.67    5.51
   1  -4  -3  549.12   10.25
  -1   4  -3  539.14    8.81
   1  -4  -4   49.60    2.72
  -1   4  -4   47.00    2.23
   1  -4  -5  986.87   12.72
   1  -4  -5  999.92   16.30
  -1   4  -5  997.21   15.05
   1  -4  -6 1280.25   20.21
   1  -4  -6 1324.18   16.81
  -1   4  -6 1257.23   18.99
   1  -4  -7  273.45    7.57
   1  -4  -7  261.66    5.56
  -1   4  -7  257.43    6.84
   1  -4  -8  703.82   11.46
  -1   4  -8  676.01   13.05
   1  -4  -9  108.35    3.95
  -1   4  -9  111.97    4.79
   1  -4 -10  190.06    5.75
  -1   4 -10  179.34    6.51
   1  -4 -11  796.80   16.25
  -1   4 -11  774.76   16.04
  -1   4 -12   80.83    4.75
  -1   4 -13   61.79    4.40
  -1   4 -14   55.79    4.41
  -1   4 -14   64.01    5.81
  -1   4 -15   31.42    3.54
   1  -4 -15   33.16    4.48
   1  -4 -15   33.80    3.04
  -1   4 -15   39.77    4.95
  -1   4 -16   49.94    5.52
   1  -4 -16   48.77    5.54
   1  -4 -16   49.71    3.76
  -1   4 -17   85.74    7.45
   1  -4 -17   72.92    6.81
   1  -4 -17   79.09    4.78
   1  -4 -18  125.20    8.79
  -1   4 -18  133.57    9.34
   1  -4 -18  122.39    6.07
  -1   4 -19  313.48   14.25
   1  -4 -19  312.81    9.95
   1  -4 -19  310.04   13.85
  -1   4 -20  142.94    9.43
   1  -4 -20  142.83    6.49
   1  -4 -20  134.10    8.74
  -1   4 -21  135.69    8.87
   1  -4 -21  130.37    8.18
   1  -4 -21  150.35    6.52
  -1   4 -22   39.27    4.70
   1  -4 -22   37.26    4.19
   1  -4 -23    7.32    1.84
   1  -4 -24    1.10    0.95
  -1  -5 -25    6.03    1.35
  -1  -5 -24   35.92    3.54
  -1  -5 -23   13.56    2.43
  -1  -5 -22    0.86    1.20
  -1  -5 -21    0.58    1.50
  -1  -5 -20  251.53   12.65
  -1  -5 -20  233.98    9.06
  -1  -5 -19  151.21   10.14
   1   5 -19  149.59    9.42
  -1  -5 -19  145.06    7.10
   1   5 -18  140.67    9.20
  -1  -5 -18  141.68   10.01
  -1  -5 -18  131.23    6.71
  -1  -5 -17   45.46    5.82
  -1  -5 -17   48.07    3.89
   1   5 -17   50.54    5.57
  -1  -5 -16   75.32    4.71
   1   5 -16   70.62    6.43
  -1  -5 -16   68.40    7.14
   1   5 -16   68.89    5.54
   1   5 -15  299.75   12.93
  -1  -5 -15  273.05   13.96
  -1  -5 -15  266.10    8.95
   1   5 -15  285.90   10.94
   1   5 -14   85.43    5.60
  -1  -5 -14   82.51    4.65
  -1  -5 -14   82.24    7.65
   1   5 -14   86.42    6.79
   1   5 -13  127.04    6.50
   1   5 -12  417.55   11.78
  -1  -5 -11  258.86    8.53
   1   5 -11  262.43    8.67
  -1  -5 -10   13.40    1.80
   1   5 -10   15.17    1.95
  -1  -5  -9  381.94    9.95
   1   5  -9  397.58   10.13
   1   5  -8 1155.86   19.37
  -1  -5  -8 1131.06   19.39
   1   5  -7  338.03    8.57
  -1  -5  -7  329.72    8.62
   1  -5   6   46.62    1.95
  -1  -5  -6   51.17    3.09
   1  -5   5  434.93    7.93
  -1  -5  -5  447.21    9.76
   1  -5   4 1150.31   16.54
   1  -5   2 2449.75   31.44
   1  -5   1  125.11    4.20
  -1   5   0    4.15    0.38
   1  -5   0    1.11    0.53
  -1   5  -1  122.59    2.87
   1  -5  -1  130.39    4.48
  -1   5  -2 2433.82   29.25
   1  -5  -2 2425.84   32.27
   1  -5  -3  509.72   10.48
  -1   5  -3  504.65    8.64
  -1   5  -4 1139.01   16.52
   1  -5  -4 1136.67   18.42
   1  -5  -5  445.18   10.10
  -1   5  -5  453.31    8.89
   1  -5  -6   49.58    3.20
  -1   5  -6   54.48    2.86
   1  -5  -7  345.83    9.22
  -1   5  -7  345.84    8.32
  -1   5  -8 1113.17   18.57
   1  -5  -8 1121.71   19.97
  -1   5  -9  401.56   10.06
  -1   5 -10   20.28    2.21
   1  -5 -10   13.39    2.05
  -1   5 -11  257.91    8.52
   1  -5 -11  244.60    8.72
   1  -5 -12  413.52   11.88
  -1   5 -12  390.59   11.34
  -1   5 -13  120.29    6.30
   1  -5 -14   86.56    4.82
   1  -5 -14   88.12    7.34
  -1   5 -14   80.02    5.35
  -1   5 -14   88.63    7.15
  -1   5 -15  252.96   10.29
   1  -5 -15  279.92   13.30
   1  -5 -15  268.13    8.99
   1  -5 -16   71.07    6.79
  -1   5 -16   75.19    7.01
   1  -5 -16   74.57    4.68
  -1   5 -17   51.09    5.98
   1  -5 -17   40.77    5.17
   1  -5 -17   47.57    3.79
   1  -5 -18  135.95    9.23
  -1   5 -18  137.51    9.55
   1  -5 -18  133.98    6.46
   1  -5 -19  153.28    6.91
   1  -5 -19  147.57    9.45
  -1   5 -19  150.79    9.98
   1  -5 -20  252.35    8.97
   1  -5 -20  258.57   12.27
  -1   5 -21    2.06    1.90
   1  -5 -21    2.25    1.05
   1  -5 -21    1.99    1.32
   1  -5 -22    2.29    1.49
   1  -5 -22    2.54    1.11
   1  -5 -23   16.96    2.52
   1  -5 -24   46.00    3.62
  -1  -6 -24    3.90    1.34
  -1  -6 -23   23.49    3.16
  -1  -6 -22   10.71    2.52
  -1  -6 -21   58.91    5.88
  -1  -6 -20   77.88    5.35
  -1  -6 -20   85.23    7.41
  -1  -6 -19  122.11    9.14
  -1  -6 -19  118.27    6.49
  -1  -6 -18   41.48    5.63
  -1  -6 -18   44.12    3.99
   1   6 -17   22.27    3.77
  -1  -6 -17   18.56    2.60
  -1  -6 -17   23.49    4.37
   1   6 -16  112.58    7.19
  -1  -6 -16  111.45    9.16
  -1  -6 -16  112.69    6.10
   1   6 -16  122.05    8.79
   1   6 -15  112.99    8.09
  -1  -6 -15   98.72    5.49
  -1  -6 -15   97.34    8.53
   1   6 -15  108.12    6.73
   1   6 -14  117.98    6.74
  -1  -6 -14  117.57    9.25
  -1  -6 -14  131.12    6.17
   1   6 -14  126.98    8.45
   1   6 -13  224.39    8.91
   1   6 -13  205.69   10.28
   1   6 -12  293.68    9.89
  -1  -6 -12  285.61    9.86
  -1  -6 -11  272.41    9.33
   1   6 -11  270.54    9.07
   1   6 -10  317.89    9.54
  -1  -6 -10  314.12    9.79
  -1  -6  -9  414.39   11.17
   1   6  -9  436.75   11.04
  -1  -6  -8  237.05    7.84
   1   6  -8  237.88    7.51
  -1  -6  -7   81.74    4.29
   1   6  -7   83.17    4.14
   1  -6   6  280.48    6.17
  -1  -6  -6  283.93    8.18
   1  -6   5  288.16    6.66
  -1  -6  -5  291.37    8.06
  -1  -6  -4  670.02   13.14
   1  -6   3  419.51    8.96
   1  -6   2 1486.03   21.76
   1  -6   1  524.10   10.56
   1  -6   0   27.85    2.19
  -1   6   0   24.94    0.98
   1  -6  -1  532.36   10.92
  -1   6  -1  505.30    7.73
  -1   6  -2 1500.62   19.48
   1  -6  -2 1510.76   22.93
   1  -6  -3  430.07   10.07
  -1   6  -3  423.71    7.93
  -1   6  -4  678.09   11.52
   1  -6  -4  679.05   13.66
  -1   6  -5  304.58    7.20
   1  -6  -5  291.31    8.50
  -1  -6   5  299.06    6.61
   1  -6  -6  294.54    8.68
  -1  -6   6  289.76    6.22
  -1   6  -6  291.30    7.42
  -1   6  -7   83.63    3.96
   1  -6  -7   76.98    4.39
   1  -6  -8  235.00    8.19
  -1   6  -8  239.94    7.32
  -1   6  -9  432.22   10.76
   1  -6  -9  432.00   11.95
  -1   6 -10  309.52    9.28
   1  -6 -11  254.75    9.51
  -1   6 -11  262.54    8.85
  -1   6 -12  276.15    9.54
   1  -6 -12  285.88   10.30
  -1   6 -13  206.51   11.02
  -1   6 -13  217.83    8.79
   1  -6 -13  233.45    8.06
   1  -6 -14  131.88    9.15
  -1   6 -14  130.55    8.82
  -1   6 -14  115.32    6.62
   1  -6 -14  129.02    6.05
  -1   6 -15   99.02    6.41
   1  -6 -15   98.76    5.41
  -1   6 -15  112.62    8.42
   1  -6 -15  115.86    8.76
   1  -6 -16  117.78    8.96
  -1   6 -16  121.10    9.18
   1  -6 -16  118.88    6.08
  -1   6 -17   23.95    4.28
   1  -6 -17   23.72    3.98
   1  -6 -17   22.00    2.63
   1  -6 -18   46.60    5.48
   1  -6 -18   45.56    3.78
  -1   6 -18   45.90    5.97
   1  -6 -19  116.39    8.47
   1  -6 -19  128.20    6.45
  -1   6 -19  142.22    9.86
   1  -6 -20   84.03    6.96
   1  -6 -20   88.94    5.27
   1  -6 -21   58.84    4.24
   1  -6 -21   57.48    5.40
   1  -6 -22   10.43    1.77
   1  -6 -22   11.61    2.38
   1  -6 -23   30.66    3.26
   1  -6 -23   24.94    2.48
   1  -6 -24    2.92    1.10
  -1  -7 -24  148.09    6.57
  -1  -7 -23    9.06    1.99
  -1  -7 -22    0.47    1.23
  -1  -7 -21   51.33    5.37
  -1  -7 -20   16.22    3.41
  -1  -7 -20   23.01    2.84
  -1  -7 -19  118.14    9.05
  -1  -7 -19  112.07    6.49
  -1  -7 -18   77.11    5.40
  -1  -7 -18   81.17    7.73
  -1  -7 -17   93.41    8.53
  -1  -7 -17   90.75    5.88
  -1  -7 -16   13.28    2.34
  -1  -7 -16   11.46    3.21
  -1  -7 -15  213.30    8.63
   1   7 -15  218.76    9.85
  -1  -7 -15  223.26   13.15
  -1  -7 -14  625.35   15.32
   1   7 -14  633.39   17.06
  -1  -7 -13   20.63    2.54
   1   7 -13   20.48    2.79
  -1  -7 -12  116.46    6.55
   1   7 -12  110.89    6.06
   1   7 -11   64.49    4.42
  -1  -7 -11   65.12    4.73
  -1  -7 -10  418.81   12.31
   1   7 -10  436.22   11.70
   1   7  -9  208.29    7.51
  -1  -7  -9  209.34    8.12
  -1  -7  -8  391.77   11.09
   1   7  -8  390.59   10.25
  -1  -7  -7  169.62    6.81
   1   7  -7  166.04    6.16
   1   7  -6  137.32    5.38
  -1  -7  -6  138.60    5.95
   1  -7   5   58.96    3.07
  -1  -7  -5   58.30    3.70
  -1  -7  -4  146.58    5.79
   1  -7   3 1326.52   20.62
  -1  -7  -3 1297.94   21.37
   1  -7   2 1903.23   27.50
  -1  -7  -2 1866.27   27.53
   1  -7   1  543.78   11.65
  -1  -7  -1  540.46   11.42
  -1  -7   0    3.00    0.99
   1  -7   0    4.86    1.19
  -1  -7   1  525.63   10.81
   1  -7  -1  550.43   11.85
  -1  -7   2 1882.32   26.63
  -1   7  -2 1872.38   23.96
   1  -7  -2 1907.32   28.56
   1  -7  -3 1336.79   22.17
  -1  -7   3 1285.72   19.81
  -1   7  -3 1313.89   18.49
  -1  -7   4  156.48    5.02
   1  -7  -4  141.27    6.04
  -1   7  -4  151.13    4.74
  -1   7  -5   60.64    3.11
   1  -7  -5   58.72    3.95
  -1  -7   5   56.84    2.89
   1  -7  -6  134.38    6.13
  -1   7  -6  134.84    5.04
  -1   7  -7  170.02    5.96
   1  -7  -7  163.10    6.99
  -1   7  -8  406.11   10.26
   1  -7  -8  390.61   11.58
   1  -7  -9  203.26    8.40
  -1   7  -9  215.92    7.50
  -1   7 -10  424.52   11.47
  -1   7 -11   67.47    4.48
   1  -7 -11   63.08    4.91
  -1   7 -12  110.87    6.06
  -1   7 -12  101.11    7.65
   1  -7 -12  106.99    6.58
  -1   7 -13   17.70    2.59
  -1   7 -13   21.28    3.90
   1  -7 -13   21.44    2.46
  -1   7 -14  687.33   22.14
   1  -7 -14  654.57   21.89
   1  -7 -14  658.67   15.33
  -1   7 -14  608.29   16.74
  -1   7 -15  204.11    9.44
  -1   7 -15  217.27   12.50
   1  -7 -15  229.35   12.77
   1  -7 -15  221.22    8.48
   1  -7 -16   15.47    2.22
   1  -7 -16   14.94    3.34
  -1   7 -16   14.87    3.67
   1  -7 -17   96.79    8.17
   1  -7 -17  105.38    5.89
  -1   7 -17  104.27    8.82
   1  -7 -18   82.64    7.43
   1  -7 -18   78.37    5.14
   1  -7 -19  116.77    8.43
   1  -7 -19  113.51    6.13
   1  -7 -20   23.24    2.79
   1  -7 -20   24.69    3.67
   1  -7 -21   55.67    4.17
   1  -7 -21   55.41    5.18
   1  -7 -22    0.60    0.79
   1  -7 -22    0.37    1.19
   1  -7 -23    7.52    1.44
   1  -7 -23   10.03    1.94
  -1  -8 -24   21.76    2.30
  -1  -8 -23  149.40    7.27
  -1  -8 -22  227.01   10.07
  -1  -8 -21    7.84    2.26
  -1  -8 -20   45.99    5.39
  -1  -8 -20   36.87    3.66
  -1  -8 -19    4.50    2.40
  -1  -8 -19    3.34    1.38
  -1  -8 -18    8.45    1.95
  -1  -8 -18    7.64    2.58
  -1  -8 -17    2.42    1.93
  -1  -8 -17    3.46    1.47
  -1  -8 -16  133.05   10.33
  -1  -8 -16  132.49    7.14
  -1  -8 -15   70.68    5.14
   1   8 -15   79.49    5.97
  -1  -8 -15   68.76    7.55
   1   8 -14   14.76    2.64
  -1  -8 -14   15.39    2.51
   1   8 -13  155.93    7.82
  -1  -8 -13  163.24    7.44
  -1  -8 -12  661.07   17.65
   1   8 -12  653.23   16.42
  -1  -8 -12  667.53   15.69
   1   8 -11  677.71   16.17
  -1  -8 -11  668.23   17.44
   1   8 -10  133.76    6.32
  -1  -8 -10  123.65    6.75
  -1  -8  -9   48.98    4.10
   1   8  -9   44.90    3.48
   1   8  -8   97.33    4.97
  -1  -8  -8   96.68    5.60
   1   8  -7   88.47    4.52
  -1  -8  -7   77.44    4.85
   1   8  -6  149.56    5.79
  -1  -8  -6  150.97    6.62
   1  -8   5   60.03    3.39
  -1  -8  -5   65.18    4.21
  -1  -8  -4   14.81    1.98
  -1  -8  -3    1.84    1.06
   1  -8   3    2.53    0.81
  -1  -8  -2  318.94    9.04
   1  -8   2  318.65    8.99
  -1  -8  -1   77.19    4.14
   1  -8   1   88.18    4.56
   1  -8   0   64.65    3.99
  -1  -8   0   65.62    3.73
   1  -8  -1   85.73    4.63
  -1  -8   1   84.30    4.15
  -1  -8   2  316.61    8.41
   1  -8  -2  323.71    9.64
  -1   8  -2  312.53    6.43
  -1   8  -3    5.73    0.86
   1  -8  -3    5.86    1.36
   1  -8  -4   16.93    2.27
  -1  -8   4   16.83    1.79
  -1  -8   5   61.56    3.26
   1  -8  -5   67.09    4.45
  -1   8  -5   63.11    3.33
   1  -8  -6  145.95    6.82
  -1   8  -6  154.38    5.61
   1  -8  -7   87.25    5.39
  -1   8  -7   84.04    4.32
   1  -8  -8   94.03    5.75
  -1   8  -8  103.95    5.04
   1  -8  -9   45.18    4.17
  -1   8  -9   49.48    3.64
  -1   8 -10  120.58    5.97
  -1   8 -11  642.32   15.63
   1  -8 -11  641.57   17.64
   1  -8 -12  631.77   17.83
  -1   8 -12  628.58   16.10
   1  -8 -12  674.29   15.20
   1  -8 -13  145.11    8.31
   1  -8 -13  167.73    7.14
  -1   8 -13  149.76    7.54
  -1   8 -14   15.16    2.67
   1  -8 -14   16.13    2.34
  -1   8 -15   63.84    5.23
   1  -8 -15   71.36    7.31
   1  -8 -15   76.47    4.97
   1  -8 -16  130.17    9.73
   1  -8 -16  129.86    6.61
   1  -8 -17    1.03    1.52
   1  -8 -17    3.00    1.36
   1  -8 -18    8.28    1.89
   1  -8 -18    7.90    2.46
   1  -8 -19    0.52    1.40
   1  -8 -19    4.70    1.53
   1  -8 -20   36.79    4.46
   1  -8 -20   39.56    3.62
   1  -8 -21    7.07    1.63
   1  -8 -21    6.63    1.96
   1  -8 -22  225.95    9.26
   1  -8 -22  226.10    8.08
   1  -8 -23  148.42    6.31
  -1  -9 -23  148.21    6.72
  -1  -9 -22   58.96    4.87
  -1  -9 -21   29.90    3.92
  -1  -9 -20   50.43    5.44
  -1  -9 -19   75.74    7.10
  -1  -9 -19   74.40    5.34
  -1  -9 -18  131.22    9.76
  -1  -9 -18  106.31    6.83
  -1  -9 -17  175.71   11.81
  -1  -9 -17  164.34    8.35
  -1  -9 -16   15.22    2.74
  -1  -9 -16   10.46    3.18
  -1  -9 -15   34.32    3.79
  -1  -9 -15   23.99    4.57
   1   9 -14   21.79    3.10
  -1  -9 -14   27.59    3.40
  -1  -9 -13   44.23    4.09
  -1  -9 -13   41.18    4.57
   1   9 -13   42.02    4.18
  -1  -9 -12  136.18    6.95
  -1   9  12  142.58    6.43
  -1  -9 -12  143.81    8.19
   1   9 -12  141.10    7.23
  -1   9  11  121.66    5.81
   1   9 -11  114.40    6.23
  -1  -9 -11  116.37    7.17
  -1  -9 -11  116.91    6.27
   1   9 -10  323.03   10.43
  -1  -9 -10  333.50   12.08
  -1  -9  -9  247.26   10.00
   1   9  -9  238.65    8.52
   1   9  -8  588.25   13.81
  -1  -9  -8  621.37   16.10
  -1  -9  -7  140.08    6.96
   1   9  -7  136.95    5.89
  -1  -9  -6   90.72    5.44
   1   9  -6   90.80    4.57
   1   9  -5  646.07   13.41
   1  -9   5  646.19   13.56
  -1  -9  -5  654.24   15.50
  -1  -9  -4  469.24   12.45
   1  -9   3   38.44    3.21
  -1  -9  -3   40.07    3.37
   1  -9   2  135.24    6.07
  -1  -9  -2  116.08    5.66
   1  -9   1 1285.70   22.93
  -1  -9  -1 1253.45   22.21
   1  -9   0  449.59   11.96
  -1  -9   0  431.28   11.10
   1  -9  -1 1289.43   23.35
  -1  -9   1 1250.10   21.69
   1  -9  -2  120.88    6.09
  -1  -9   2  118.01    5.30
   1  -9  -3   40.83    3.66
  -1  -9   3   34.53    2.81
   1  -9  -4  477.62   13.30
  -1  -9   4  465.60   11.03
  -1   9  -4  496.36   10.20
  -1  -9   5  659.59   13.29
  -1   9  -5  678.11   13.16
   1  -9  -5  673.58   16.45
  -1   9  -6  103.51    4.72
   1  -9  -6   89.13    5.68
   1  -9  -7  134.41    7.12
  -1   9  -7  135.19    5.75
   1  -9  -8  581.24   16.21
  -1   9  -8  614.49   13.98
   1  -9  -9  244.34   10.31
  -1   9  -9  242.83    8.57
  -1   9 -10  316.95   10.35
  -1   9 -11  111.19    6.09
   1  -9 -11  111.69    7.37
   1  -9 -11  117.85    5.84
  -1   9 -12  121.38    6.72
   1  -9 -12  116.38    7.60
   1  -9 -12  129.20    6.28
   1  -9 -13   36.88    4.67
  -1   9 -13   38.32    3.94
   1  -9 -13   48.54    3.97
   1  -9 -14   25.98    2.99
  -1   9 -14   20.41    2.94
   1  -9 -15   32.50    3.41
   1  -9 -15   29.87    4.84
   1  -9 -16   10.43    3.19
   1  -9 -16   13.48    2.36
   1  -9 -17  172.14    7.97
   1  -9 -17  172.87   11.09
   1  -9 -18  129.47    6.85
   1  -9 -18  124.77    9.02
   1  -9 -19   93.14    7.42
   1  -9 -19   82.77    5.37
   1  -9 -20   43.27    4.73
   1  -9 -20   47.40    3.98
   1  -9 -21   30.61    3.59
   1  -9 -21   28.79    3.01
   1  -9 -22   49.59    3.95
   1  -9 -22   49.57    3.59
  -1 -10 -23    9.21    1.56
  -1 -10 -22   31.14    3.29
  -1 -10 -21    1.24    1.26
  -1 -10 -20   14.01    2.92
  -1 -10 -19   -0.03    1.61
  -1 -10 -18    5.45    1.67
  -1 -10 -18    2.38    1.64
  -1 -10 -17   13.26    2.59
  -1 -10 -17   10.37    3.23
  -1 -10 -16   88.91    6.27
  -1 -10 -16   98.35    9.13
  -1 -10 -15   42.74    4.50
  -1 -10 -14  527.23   15.68
  -1  10  13  558.11   13.98
   1  10 -13  500.38   15.23
  -1 -10 -13  508.97   15.22
  -1 -10 -13  545.14   17.82
   1  10 -12  477.63   14.31
  -1 -10 -12  493.49   14.61
  -1 -10 -12  504.24   16.74
  -1  10  12  511.65   13.30
  -1  10  11  349.24   10.58
   1  10 -11  330.82   11.21
  -1 -10 -11  348.66   13.38
  -1 -10 -11  333.33   11.54
  -1 -10 -10   18.18    2.73
  -1  10  10   22.54    2.54
  -1 -10 -10   18.06    3.05
   1  10 -10   15.30    2.33
  -1 -10  -9   27.68    3.51
   1  10  -9   24.55    2.75
  -1 -10  -9   24.33    2.99
  -1 -10  -8   98.22    6.39
   1  10  -8   97.99    5.28
  -1 -10  -7  319.16   11.45
   1  10  -7  316.72    9.51
   1  10  -6   16.80    2.00
  -1 -10  -6   19.80    2.71
   1  10  -5   53.37    3.44
  -1 -10  -5   53.26    4.36
  -1 -10  -4  595.43   15.25
   1  10  -4  620.28   12.91
   1  10  -3  601.69   12.39
  -1 -10  -3  590.25   14.86
  -1 -10  -2  404.51   11.87
   1 -10   2  437.94   12.35
   1 -10   1   32.59    3.29
  -1 -10  -1   29.43    3.02
   1 -10   0  562.93   14.53
  -1 -10   0  533.90   13.41
   1 -10  -1   33.65    3.42
  -1 -10   1   27.81    2.82
   1 -10  -2  423.47   12.69
  -1 -10   2  405.10   11.13
   1 -10  -3  605.99   15.82
  -1 -10   3  589.97   13.69
  -1 -10   4  602.40   13.76
   1 -10  -4  608.73   16.17
  -1 -10   5   56.63    3.67
   1 -10  -5   51.50    4.51
   1 -10  -6   16.46    2.66
   1 -10  -7  311.27   11.86
   1 -10  -8   94.63    6.56
  -1  10  -8   96.41    5.20
  -1  10  -9   29.41    2.97
   1 -10  -9   26.00    2.75
   1  10  10   17.10    2.42
   1 -10 -10   19.44    2.45
  -1  10 -10   16.58    2.38
   1  10  11  353.86   11.03
   1 -10 -11  355.90   10.93
  -1  10 -11  320.48   11.08
   1 -10 -11  336.57   13.60
   1 -10 -12  464.64   16.46
   1 -10 -12  495.73   13.48
  -1  10 -12  455.27   13.88
  -1  10 -13  482.13   14.75
   1 -10 -13  474.19   17.08
   1 -10 -14  562.61   15.06
   1 -10 -15   46.63    6.08
   1 -10 -15   45.25    4.14
   1 -10 -16   89.34    5.82
   1 -10 -16   93.54    8.43
   1 -10 -17   10.15    2.08
   1 -10 -17    6.85    2.42
   1 -10 -18    3.19    1.39
   1 -10 -18    0.73    1.63
   1 -10 -19   -1.22    1.40
   1 -10 -19    0.83    1.09
   1 -10 -20   14.33    2.74
   1 -10 -20    9.19    1.95
   1 -10 -21    4.19    1.35
   1 -10 -21    1.62    1.11
   1 -10 -22   29.48    2.79
  -1 -11 -22   52.80    3.88
  -1 -11 -21   29.08    3.40
  -1 -11 -20  183.83    9.49
  -1 -11 -19   13.32    2.93
  -1 -11 -18   52.29    6.03
  -1 -11 -17   89.47    6.23
  -1 -11 -17  103.60    8.85
  -1 -11 -16   71.84    7.78
  -1 -11 -16   65.58    5.42
  -1 -11 -15   52.34    5.12
  -1 -11 -14   77.87    6.06
  -1  11  14   86.77    5.26
  -1 -11 -13   73.26    5.92
  -1  11  13   87.71    5.36
   1  11 -12  110.79    6.71
  -1 -11 -12  124.11    7.36
  -1  11  12  131.17    6.51
  -1 -11 -12  129.65    8.67
  -1  11  11  285.73    9.80
  -1 -11 -11  302.26   13.02
  -1 -11 -11  285.75   11.25
   1  11 -11  286.23   10.62
  -1 -11 -10  318.34   11.71
  -1  11  10  326.37   10.29
  -1 -11 -10  348.28   13.62
   1  11 -10  317.86   10.79
  -1  11   9   53.28    3.95
  -1 -11  -9   57.68    5.38
  -1 -11  -9   61.73    4.88
   1  11  -9   60.69    4.36
  -1 -11  -8  333.46   11.78
  -1 -11  -8  380.08   13.56
  -1  11   8  325.58   10.06
   1  11  -8  364.80   10.81
  -1 -11  -7  580.63   16.79
   1  11  -7  569.47   13.59
  -1  11   7  536.44   13.17
  -1 -11  -6  208.69    9.44
   1  11  -6  207.38    7.43
  -1 -11  -5   22.50    3.06
  -1 -11  -4   31.56    3.54
   1 -11   4   27.59    2.99
  -1 -11  -3  497.43   14.21
   1 -11   2  129.28    6.87
  -1 -11  -2  127.42    6.77
  -1 -11  -1   80.52    5.17
   1 -11   1   81.89    5.48
   1 -11   0   17.20    2.63
  -1 -11   0   16.19    2.41
  -1 -11   1   82.38    5.18
   1 -11  -1   89.34    5.92
  -1 -11   2  127.00    6.35
   1 -11  -2  131.81    7.33
  -1 -11   3  499.18   13.18
   1 -11  -3  503.09   15.09
  -1 -11   4   32.97    3.13
   1 -11  -4   30.77    3.66
   1 -11  -5   18.65    3.04
   1 -11  -6  202.05    9.74
   1 -11  -7  577.25   17.53
   1 -11  -8  359.54   10.68
   1  11   8  341.55   10.62
   1 -11  -9   59.49    4.33
   1  11   9   51.62    4.05
   1 -11 -10  336.06   10.82
   1  11  10  336.06   10.95
   1 -11 -10  343.53   13.97
   1  11  11  292.72   10.35
   1 -11 -11  304.78   10.49
   1 -11 -11  286.67   13.12
   1 -11 -12  110.98    8.15
   1  11  12  127.28    6.76
   1 -11 -12  119.47    6.67
   1 -11 -13   80.43    5.51
   1 -11 -14   77.48    5.47
   1 -11 -15   67.52    5.16
   1 -11 -15   56.52    6.79
   1 -11 -16   60.54    4.91
   1 -11 -16   73.40    7.39
   1 -11 -17   95.32    6.13
   1 -11 -17   83.91    7.59
   1 -11 -18   44.05    5.29
   1 -11 -18   47.44    4.32
   1 -11 -19   11.57    2.46
   1 -11 -19   10.52    2.16
   1 -11 -20  181.91    8.60
   1 -11 -20  163.03    7.26
   1 -11 -21   25.16    2.82
  -1 -12 -21    7.19    1.61
  -1 -12 -20   41.93    4.21
  -1 -12 -19    8.96    2.38
  -1 -12 -18    6.18    2.01
  -1 -12 -17    4.05    2.21
  -1 -12 -16  250.47   14.21
  -1 -12 -15  190.77    9.41
  -1  12  14   11.03    2.18
  -1 -12 -14   10.32    2.61
  -1  12  13  278.83    9.98
  -1 -12 -13  248.78   11.00
  -1  12  12  448.80   12.79
  -1 -12 -12  402.79   14.32
  -1  12  11  190.54    8.02
  -1 -12 -11  187.45    9.32
  -1 -12 -11  206.59   11.13
  -1 -12 -10   12.82    2.76
  -1 -12 -10   11.03    2.48
  -1  12  10   15.19    2.33
  -1 -12  -9  439.55   14.53
  -1  12   9  458.40   12.64
  -1 -12  -8   30.19    3.67
  -1  12   8   30.03    3.02
  -1 -12  -8   29.73    4.09
  -1 -12  -8   31.65    4.19
  -1  12   7   44.26    3.62
  -1 -12  -7   34.44    3.93
  -1 -12  -7   46.39    4.83
  -1 -12  -6  140.57    8.20
  -1  12   6  138.29    6.37
  -1 -12  -5  189.59    9.31
  -1  12   5  168.12    6.95
  -1  12   4   63.54    4.17
  -1 -12  -4   68.69    5.48
   1 -12   3    7.06    1.95
  -1 -12  -3    9.35    2.19
  -1 -12  -2   68.87    5.27
  -1 -12  -1   55.30    4.70
  -1 -12   0 1051.72   22.53
   1 -12   0 1052.26   23.75
   1 -12  -1   45.70    4.53
  -1 -12   1   55.47    4.53
  -1 -12   2   69.80    4.98
   1 -12  -2   70.85    5.73
  -1 -12   3    9.64    1.79
   1 -12  -3    5.88    1.79
   1  12   4   64.97    4.42
   1 -12  -4   62.83    5.59
   1  12   5  166.54    7.23
   1 -12  -5  180.12    9.54
   1 -12  -6  152.42    8.95
   1 -12  -6  144.30    6.73
   1  12   6  132.20    6.47
   1 -12  -7   46.15    3.88
   1  12   7   41.99    3.72
   1 -12  -8   34.39    3.41
   1  12   8   29.56    3.18
   1 -12  -9  465.72   16.99
   1 -12  -9  455.60   13.31
   1  12   9  456.62   13.12
   1 -12 -10   11.99    3.10
   1 -12 -10   13.82    2.41
   1  12  10   12.55    2.29
   1 -12 -11  186.87   10.91
   1  12  11  196.29    8.53
   1 -12 -11  197.73    8.78
   1  12  12  440.80   13.28
   1 -12 -12  439.72   13.62
   1 -12 -13  278.09   10.81
   1  12  13  276.50   10.34
   1 -12 -14   11.35    2.33
   1 -12 -15  187.10   12.32
   1 -12 -15  193.73    9.03
   1 -12 -16  253.78   10.38
   1 -12 -16  242.26   13.33
   1 -12 -17    1.43    1.51
   1 -12 -17    3.08    1.41
   1 -12 -18   11.09    2.20
   1 -12 -18    7.28    2.24
   1 -12 -19    9.55    2.00
   1 -12 -19    8.21    1.95
   1 -12 -20   38.28    3.56
  -1 -13 -20    2.62    1.17
  -1 -13 -19   51.10    4.79
  -1 -13 -18  118.66    8.05
  -1 -13 -17   61.41    6.34
  -1 -13 -16   41.90    5.76
  -1  13  15   29.18    3.14
  -1  13  14  169.35    7.51
  -1  13  13   34.14    3.43
  -1  13  12   77.93    5.22
  -1  13  11  186.06    8.04
  -1  13  10  177.99    7.81
  -1 -13  -9  113.81    8.17
  -1  13   9  103.83    5.84
  -1 -13  -8   48.50    5.35
  -1  13   8   44.66    3.82
  -1 -13  -8   57.09    5.76
  -1 -13  -7  485.30   16.66
  -1 -13  -7  447.10   15.98
  -1 -13  -6   21.43    3.45
  -1  13   6   21.83    2.74
  -1  13   5   69.27    4.59
  -1 -13  -5   63.07    5.70
  -1 -13  -4  131.09    8.09
  -1  13   4  122.00    6.08
  -1  13   3  187.29    7.64
  -1 -13  -3  205.22    9.86
   1  13  -3  203.13    8.25
  -1 -13  -2   56.47    5.04
  -1  13   2   52.58    3.95
   1  13  -2   57.17    4.39
   1 -13   2   56.73    5.07
  -1 -13  -1  198.84    9.47
   1  13  -1  206.74    8.36
  -1  13   1  194.49    7.64
   1  13   0    2.72    1.29
  -1  13   0    3.25    1.42
  -1 -13   0    2.39    1.25
   1  13   1  181.85    7.83
  -1  13  -1  191.03    7.45
  -1 -13   1  194.62    9.04
  -1  13  -2   53.07    3.93
  -1 -13   2   59.16    4.90
   1  13   2   52.51    4.20
   1  13   3  184.78    7.91
  -1 -13   3  202.72    8.87
   1  13   4  117.12    6.35
   1  13   5   58.72    4.43
   1  13   6   15.11    2.43
   1 -13  -6   19.03    2.70
   1  13   7  422.49   12.66
   1 -13  -7  442.67   13.25
   1 -13  -8   44.90    5.25
   1  13   8   52.35    4.36
   1 -13  -8   50.68    4.39
   1 -13  -9   99.37    7.89
   1  13   9  110.72    6.38
   1 -13  -9  109.55    6.59
   1  13  10  179.51    8.22
   1 -13 -10  181.38    8.57
   1  13  11  193.94    8.63
   1 -13 -11  201.99    9.31
   1  13  12   71.22    5.21
   1 -13 -12   69.74    5.55
   1 -13 -13   35.19    3.92
   1  13  13   37.51    3.77
   1 -13 -14  165.16    8.55
   1 -13 -15   22.93    4.44
   1 -13 -15   29.80    3.72
   1 -13 -16   44.32    4.39
   1 -13 -16   43.22    5.46
   1 -13 -17   63.95    6.05
   1 -13 -17   51.81    4.59
   1 -13 -18  108.45    7.07
   1 -13 -19   49.97    4.24
  -1 -14 -20    5.80    1.32
  -1 -14 -19    6.23    1.64
  -1 -14 -18   16.96    2.93
  -1 -14 -17   46.60    5.17
  -1 -14 -16   15.96    3.45
  -1 -14 -15   21.69    4.42
  -1  14  15   23.74    2.70
  -1  14  14   12.98    2.14
  -1  14  13   92.79    5.61
  -1  14  12   42.47    3.94
  -1  14  11   81.17    5.36
  -1  14  10  336.94   11.11
  -1  14   9  317.01   10.74
  -1 -14  -9  366.03   14.64
  -1  14   8  194.39    8.20
  -1 -14  -8  207.40   11.04
  -1  14   7  162.39    7.47
  -1 -14  -7  196.42   10.54
  -1  14   6   31.91    3.30
  -1 -14  -6   30.31    4.28
  -1  14   5  147.37    6.98
  -1 -14  -5  158.29    9.39
  -1  14   4  146.09    6.88
  -1 -14  -4  142.41    8.85
   1  14  -4  143.96    7.10
  -1  14   3   83.64    5.18
   1  14  -3   79.62    5.33
  -1 -14  -3   86.27    6.73
  -1  14   2   50.81    4.10
  -1 -14  -2   57.93    5.51
   1  14  -2   55.15    4.44
  -1  14   1   35.43    3.47
  -1 -14  -1   41.74    4.62
   1  14  -1   37.88    3.83
   1 -14   1   42.03    4.75
  -1 -14   0  571.89   17.33
   1  14   0  564.05   15.23
  -1  14   0  546.03   14.01
   1 -14   0  565.06   18.01
   1  14   1   44.44    4.12
  -1  14  -1   42.99    3.65
  -1 -14   1   38.25    4.28
  -1  14  -2   49.63    3.98
   1  14   2   56.59    4.53
  -1 -14   2   55.48    5.02
   1  14   3   82.97    5.48
   1  14   4  135.67    7.05
   1  14   5  162.49    7.70
   1 -14  -6   29.15    4.31
   1  14   6   31.59    3.48
   1  14   7  183.19    8.26
   1 -14  -7  174.57    8.45
   1  14   8  199.36    8.68
   1 -14  -8  200.72    9.20
   1  14   9  314.76   11.21
   1 -14  -9  333.64   12.16
   1  14  10  333.97   11.64
   1 -14 -10  355.00   12.84
   1 -14 -11   81.91    6.17
   1  14  11   83.54    5.67
   1  14  12   39.48    3.92
   1 -14 -12   48.25    4.79
   1 -14 -13   83.47    6.28
   1  14  13   97.02    5.92
   1 -14 -14    9.50    2.25
   1  14  14   14.84    2.35
   1 -14 -15   22.99    3.25
   1 -14 -15   19.84    4.07
   1 -14 -16   16.56    3.33
   1 -14 -17   43.78    4.58
   1 -14 -18   20.57    2.86
  -1 -15 -18   48.75    4.18
  -1 -15 -17   21.74    3.20
  -1 -15 -16    5.10    2.08
  -1  15  15   39.71    3.21
  -1 -15 -15   31.24    4.84
  -1  15  14   32.72    3.15
  -1  15  13   12.25    2.10
  -1  15  12  114.92    6.25
  -1  15  11   24.11    2.96
  -1  15  10   58.35    4.54
  -1 -15  -9   82.21    6.84
  -1  15   9   80.00    5.28
  -1  15   8  126.20    6.65
  -1 -15  -8  143.70    9.18
  -1  15   7  117.06    6.41
  -1 -15  -7  135.49    9.00
  -1 -15  -6    7.83    2.35
  -1  15   6    6.89    1.84
  -1  15   5   43.53    3.90
  -1  15   4   92.96    5.67
   1  15  -4   90.95    5.75
  -1  15   3  148.09    7.20
   1  15  -3  146.95    7.47
  -1 -15  -2  254.31   12.01
   1  15  -2  255.23   10.01
  -1  15   2  253.16    9.51
  -1  15   1  201.82    8.48
   1  15  -1  213.58    9.15
  -1 -15  -1  210.00   10.79
  -1  15   0    5.25    1.68
   1  15   0    6.30    1.89
  -1 -15   0    7.01    2.05
   1 -15   0    3.97    1.72
   1 -15  -1  197.42   10.81
  -1 -15   1  221.40   10.74
  -1  15  -1  220.09    8.60
   1  15   1  222.72    9.36
  -1  15  -2  239.63    9.05
   1  15   2  250.90   10.00
   1 -15  -2  253.22   12.33
   1  15   3  149.69    7.59
   1 -15  -3  141.95    9.33
   1  15   4   89.34    5.88
   1  15   5   44.19    4.11
   1  15   6    3.84    1.64
   1  15   7  112.71    6.59
   1  15   8  132.87    7.17
   1  15   9   76.60    5.43
   1  15  10   50.88    4.41
   1  15  11   22.72    3.00
   1  15  12  115.79    6.46
   1  15  13   12.69    2.23
   1  15  14   29.15    2.98
   1 -15 -15   33.89    4.58
   1 -15 -16    6.09    2.01
   1 -15 -17   18.53    2.77
  -1 -16 -17    0.60    0.94
  -1 -16 -16   13.34    2.56
  -1  16  15   80.20    4.29
  -1 -16 -15   76.07    6.52
  -1  16  14   38.57    3.27
  -1  16  13   59.09    4.14
  -1  16  12   57.65    4.24
  -1  16  11   21.91    2.75
  -1  16  10   29.97    3.23
  -1 -16  -9   23.99    3.81
  -1  16   9   17.73    2.57
  -1 -16  -8  193.49   10.48
  -1  16   8  174.48    7.83
  -1  16   7  218.00    8.85
  -1 -16  -7  231.99   11.73
  -1  16   6   13.79    2.32
  -1 -16  -6   14.62    3.36
  -1  16   5   10.62    2.03
  -1 -16  -5   12.89    3.12
  -1  16   4   22.26    2.93
  -1  16   3   67.59    5.00
   1  16  -3   66.75    5.02
  -1  16   2  207.49    8.73
   1  16  -2  219.96    9.26
  -1  16   1  250.48    9.63
   1  16  -1  249.83   10.11
  -1  16   0   45.46    3.98
   1  16   0   47.36    4.42
  -1  16  -1  259.63    9.58
   1  16   1  267.77   10.39
   1  16   2  230.55    9.61
  -1  16  -2  216.22    8.68
   1  16   3   80.34    5.62
   1  16   4   23.87    3.19
   1  16   5   11.38    2.31
   1  16   6   13.26    2.55
   1  16   7  204.58    8.92
   1 -16  -8  173.91    9.63
   1  16   8  175.46    8.20
   1  16   9   17.02    2.66
   1  16  10   33.07    3.49
   1  16  11   18.76    2.64
   1  16  12   56.53    4.32
   1  16  13   62.90    4.43
   1 -16 -14   26.12    4.04
   1 -16 -15   60.23    5.30
   1 -16 -16   12.33    2.27
  -1 -17 -16   13.77    2.12
  -1 -17 -15    8.40    2.07
  -1  17  14   44.33    3.15
  -1 -17 -14   38.01    4.53
  -1  17  13   26.68    2.72
  -1  17  12   24.27    2.72
  -1  17  11   56.89    4.13
  -1  17  10   10.10    1.97
  -1  17   9   88.84    5.40
  -1 -17  -9   95.65    6.74
  -1 -17  -8   43.84    4.86
  -1  17   8   44.11    3.88
  -1  17   7  173.97    7.77
  -1 -17  -7  179.78   10.12
  -1  17   6   16.55    2.57
  -1 -17  -6   15.53    3.27
  -1 -17  -5  283.62   13.06
  -1  17   5  252.01    9.62
  -1 -17  -4   95.95    7.74
  -1  17   4   83.93    5.46
  -1  17   3   20.43    2.81
   1  17  -2   11.17    2.25
  -1  17   2   11.57    2.35
   1  17  -1  330.25   11.46
  -1  17   1  323.87   11.03
  -1  17   0   22.99    3.05
   1  17   0   24.89    3.23
   1  17   1  320.87   11.54
  -1  17  -1  315.96   10.67
  -1  17  -2   13.69    2.20
   1  17   2   16.14    2.75
   1  17   3   22.94    3.23
   1  17   4   87.63    5.83
   1  17   5  247.83    9.88
   1  17   6   20.20    2.93
   1  17   7  178.06    8.14
   1 -17  -7  175.70    9.60
   1  17   8   43.74    4.04
   1  17   9   85.69    5.43
  -1 -17   9   69.78    6.00
   1  17  10    7.77    1.68
   1  17  11   53.91    4.11
   1  17  12   25.64    2.82
   1 -17 -13   12.04    2.68
   1 -17 -14   24.18    3.17
   1 -17 -15    3.51    1.59
  -1 -18 -14   39.84    3.86
  -1  18  13   76.26    4.03
  -1 -18 -13   45.27    4.70
  -1  18  12    1.11    0.88
  -1  18  11    1.32    0.82
  -1  18  10    1.89    1.02
  -1 -18  -9   11.81    2.18
  -1  18   9   13.02    2.15
  -1  18   8    3.16    1.36
  -1 -18  -8    3.79    1.63
  -1 -18  -7   14.27    2.85
  -1  18   7   13.08    2.28
  -1  18   6   36.71    3.56
  -1 -18  -6   41.27    4.75
  -1 -18  -5   77.12    6.61
  -1  18   5   69.73    4.82
  -1  18   4  117.77    6.40
  -1 -18  -4  125.22    8.49
  -1  18   3   18.07    2.65
  -1 -18  -3   19.13    3.68
  -1  18   2   30.31    3.31
  -1 -18  -2   32.70    4.64
  -1  18   1  188.64    8.12
  -1 -18  -1  208.17   11.14
   1  18   0   28.62    3.38
  -1  18   0   29.56    3.27
   1  18   1  193.74    8.48
  -1  18  -1  184.06    7.71
  -1  18  -2   28.21    3.07
   1  18   2   36.60    3.73
   1  18   3   19.34    2.82
   1  18   4  109.59    6.34
   1  18   5   67.03    4.97
   1 -18  -6   36.80    4.43
   1  18   6   32.51    3.47
   1 -18  -7   13.33    2.62
  -1 -18   7    9.87    2.41
   1  18   7   12.50    2.22
   1  18   8    2.31    1.17
  -1 -18   8    2.30    1.37
  -1 -18   9   15.99    2.66
   1  18   9   11.14    1.92
   1  18  10    0.27    0.86
   1 -18 -13   27.38    3.27
  -1 -19 -13   27.59    2.89
  -1  19  12   49.34    3.05
  -1 -19 -12   18.51    2.94
  -1  19  11   15.08    1.83
  -1  19  10   14.91    1.93
   1 -19  10   11.84    1.95
  -1  19   9    2.74    1.04
  -1  19   8   25.82    2.71
  -1 -19  -8   28.22    3.24
  -1  19   7   14.25    2.16
  -1 -19  -7   11.11    2.33
  -1 -19  -6    7.35    2.05
  -1  19   6   10.30    1.87
  -1 -19  -5  134.11    8.12
  -1  19   5  129.99    6.30
  -1 -19  -4   29.37    4.08
  -1  19   4   22.62    2.81
  -1  19   3  189.22    7.80
  -1 -19  -3  203.25   10.49
  -1  19   2   46.83    3.88
  -1 -19  -2   58.96    5.75
  -1  19   1   15.23    2.29
  -1 -19  -1   11.72    2.90
  -1  19   0   51.12    3.89
  -1 -19   0   55.85    5.60
  -1  19  -1   10.52    1.90
  -1 -19   1   17.40    3.34
  -1 -19   2   45.76    5.06
   1  19   3  173.19    7.63
  -1 -19   3  174.50    9.51
   1 -19  -4   23.15    3.48
  -1 -19   4   22.00    3.43
   1  19   4   17.52    2.59
   1  19   5  124.44    6.29
   1 -19  -5  135.69    7.99
   1 -19  -6   11.60    2.43
  -1 -19   6    8.20    2.34
   1  19   6   10.49    1.97
   1 -19  -7   15.60    2.59
  -1 -19   7   11.81    2.45
   1  19   7   13.75    2.11
   1  19   8   19.40    2.35
  -1 -19   8   20.02    2.81
  -1  20  10    6.71    1.21
   1 -20   9    4.14    1.15
  -1  20   9    5.88    1.19
   1 -20   8    5.12    1.46
  -1  20   8    3.21    1.02
  -1  20   7   19.65    2.21
  -1 -20  -7   16.95    2.38
  -1  20   6   48.15    3.52
  -1 -20  -6   46.13    4.09
  -1 -20  -5    7.53    1.96
  -1  20   5    8.82    1.74
  -1 -20  -4  165.81    8.46
  -1  20   4  148.46    6.39
  -1  20   3  104.25    5.31
  -1 -20  -3  116.00    7.25
  -1  20   2   10.11    1.83
  -1 -20  -2    7.59    2.23
  -1 -20  -1   20.66    3.25
  -1  20   1   17.17    2.16
  -1  20   0    1.62    0.92
  -1 -20   0    1.43    1.38
  -1 -20   1   17.29    2.90
   1 -20  -2   10.81    2.50
  -1 -20   2   10.92    2.58
  -1 -20   3   88.17    6.31
   1 -20  -3  110.23    6.96
  -1 -20   4  144.74    7.77
   1 -20  -4  159.03    8.15
   1 -20  -5    7.54    1.85
  -1 -20   5    5.81    1.77
  -1 -20   6   38.76    3.68
   1 -20  -6   42.38    3.79
  -1 -20   7   15.17    2.29
  -1 -20   8    3.07    1.10
  -1 -21  -6    5.84    1.28
   1 -21   6    5.70    1.41
  -1 -21  -5    6.38    1.51
   1 -21   5    5.54    1.46
   1 -21   4   23.85    2.91
  -1 -21  -4   22.76    2.76
   1 -21   3   17.91    2.66
  -1 -21  -3   22.26    2.86
   1 -21   2   18.36    2.76
  -1 -21  -2   18.52    2.68
   1 -21   1   21.87    3.02
  -1 -21  -1   20.29    2.87
  -1 -21   0   50.50    4.40
   1 -21   0   48.03    4.32
   1 -21  -1   20.72    2.84
  -1 -21   1   20.01    2.82
  -1 -21   2   16.53    2.56
   1 -21  -2   18.69    2.83
   1 -21  -3   19.19    2.67
  -1 -21   3   17.25    2.52
  -1 -21   4   22.90    2.74
   1 -21  -4   24.68    2.87
   1 -21  -5    6.41    1.45
  -1 -21   5    4.81    1.43
  -1 -21   6    5.79    1.29
  -1 -22  -2   16.29    2.08
   1 -22   2   20.15    2.42
   1 -22   1    2.02    1.02
  -1 -22  -1   -0.05    0.70
   1 -22   0    2.14    0.99
  -1 -22   0    0.56    0.83
  -1 -22   1    1.50    0.94
   1 -22  -1    0.18    0.71
  -1 -22   2   18.00    2.11
   2   0   0 9999.00  111.72
   2   0  -1 3880.36   45.60
   2   0   1 3792.26   45.36
   2   0  -2    6.76    0.88
   2   0   2    6.15    0.84
   2   0   3 2453.56   30.37
   2   0  -3 2452.04   30.82
   2   0  -4 1836.57   24.39
   2   0  -5  307.14    6.89
   2   0  -6    8.72    1.14
   2   0  -7  224.69    5.97
   2   0  -8  109.92    4.07
   2   0  -8  116.69    4.50
   2   0  -9   27.82    2.27
   2   0  -9   26.93    2.03
   2   0 -10  616.24   12.69
   2   0 -11  259.40    7.92
   2   0 -12 2102.09   31.67
   2   0 -13    4.44    1.22
   2   0 -14   50.04    3.94
   2   0 -15  888.10   18.16
   2   0 -15  912.09   22.50
  -2   0 -15  899.66   24.65
   2   0 -15  851.94   19.30
  -2   0 -16   19.64    3.83
   2   0 -16   26.30    3.20
   2   0 -16   23.06    2.62
   2   0 -16   26.05    3.74
  -2   0 -17  572.96   19.78
   2   0 -17  625.97   18.63
   2   0 -17  601.10   14.20
  -2   0 -18   38.28    5.18
   2   0 -18   30.12    4.10
   2   0 -19   31.60    4.31
  -2   0 -19   30.75    4.69
   2   0 -20   12.82    2.82
  -2   0 -20   11.23    2.97
  -2   0 -21  162.47    9.70
   2   0 -21  178.09    9.31
  -2   0 -22   86.70    6.86
   2   0 -22   90.04    6.40
  -2   0 -23    8.81    2.41
  -2   0 -24  133.60    7.39
  -2   0 -25    1.06    1.43
  -2  -1 -25   19.18    2.52
  -2  -1 -24   31.76    3.56
  -2  -1 -23   22.79    3.48
   2   1 -22  115.80    7.16
  -2  -1 -22  105.64    7.52
   2   1 -21   13.15    2.88
  -2  -1 -21   23.73    3.91
   2   1 -20   19.28    3.18
  -2  -1 -20   17.33    3.45
   2   1 -19  147.65    8.83
  -2  -1 -19  145.30    9.78
  -2  -1 -18  110.18    8.57
   2   1 -18  118.21    7.89
   2   1 -17   44.36    4.98
   2   1 -17   40.40    4.23
  -2  -1 -17   43.01    5.59
   2   1 -16   83.10    6.43
   2   1 -16   72.20    5.38
  -2  -1 -16   74.72    7.01
   2   1 -15  116.63    6.50
   2   1 -15  124.25    7.60
  -2  -1 -15  128.49    9.06
   2   1 -14  362.93   11.31
   2   1 -13   53.02    3.91
   2   1 -12    0.26    0.77
   2   1 -11  186.56    6.83
   2   1 -10   70.08    3.92
   2   1  -9 2014.02   29.15
   2   1  -9 2014.15   26.46
   2   1  -8 1800.49   24.25
   2   1  -7  424.51    8.41
   2   1  -6 1436.38   20.17
   2   1  -5 2741.47   34.23
   2   1  -4 2822.07   34.32
   2  -1   4 2696.06   33.66
   2   1  -3  273.74    6.20
   2  -1   3  276.89    5.96
   2   1  -2 2788.23   34.09
   2  -1   2 2750.43   34.04
   2  -1   1 4235.29   50.04
   2   1  -1 4254.44   49.96
   2  -1   0 2785.46   34.11
   2   1   0 2751.04   33.92
   2  -1  -1 4229.13   49.70
   2   1   1 4167.81   49.26
   2  -1  -2 2693.78   33.65
   2  -1  -3  280.26    6.44
   2  -1  -4 2765.63   34.90
   2  -1  -5 2822.06   35.81
   2  -1  -6 1456.26   21.16
   2  -1  -7  417.51    9.03
   2  -1  -7  423.69    8.73
   2  -1  -8 1835.41   25.57
   2  -1  -8 1853.22   26.15
   2  -1  -9 1965.91   27.70
   2  -1  -9 1999.00   27.92
   2  -1 -10   72.00    3.64
   2  -1 -10   66.51    3.55
   2  -1 -11  196.65    6.64
   2  -1 -12    0.97    0.62
   2  -1 -13   57.93    3.92
   2  -1 -14  374.88   11.15
   2  -1 -15  120.78    5.93
  -2   1 -15  123.96    8.61
   2  -1 -15  122.32    7.83
   2  -1 -15  116.38    6.23
  -2   1 -16   80.54    7.12
   2  -1 -16   70.40    6.14
   2  -1 -16   76.76    4.74
   2  -1 -16   64.55    4.81
  -2   1 -17   48.66    5.66
   2  -1 -17   37.14    3.94
   2  -1 -17   44.48    4.94
   2  -1 -17   46.26    3.75
  -2   1 -18  112.89    8.54
   2  -1 -18  115.58    7.86
   2  -1 -18  114.33    5.76
   2  -1 -19  162.23    6.75
   2  -1 -19  151.96    8.91
  -2   1 -19  140.81    9.51
   2  -1 -20   19.57    3.32
  -2   1 -20   14.67    3.24
  -2   1 -21   19.90    4.29
   2  -1 -21   16.26    3.07
   2  -1 -22  108.15    6.81
  -2   1 -22  103.86    7.49
  -2   1 -23   18.43    3.41
  -2   1 -24   45.15    4.30
  -2  -2 -25   39.78    3.49
  -2  -2 -24    9.85    2.03
  -2  -2 -23   31.56    3.87
  -2  -2 -22   66.59    5.98
  -2  -2 -21   21.43    3.72
   2   2 -21   37.14    4.32
   2   2 -20   74.00    6.18
  -2  -2 -20   64.70    6.46
  -2  -2 -19    0.81    1.58
   2   2 -19    0.34    1.51
   2   2 -18   22.08    3.55
  -2  -2 -18   19.41    3.66
  -2  -2 -17   93.48    8.02
   2   2 -17  107.15    7.42
   2   2 -17   91.02    6.36
   2   2 -16   92.88    6.76
   2   2 -16   95.75    6.29
  -2  -2 -16   92.39    7.92
   2   2 -15   83.17    6.24
   2   2 -15   73.15    5.24
   2   2 -14  139.42    6.88
  -2  -2 -14  142.24    9.38
   2   2 -13  491.01   13.08
   2   2 -12  413.71   11.40
   2   2 -11   11.87    1.75
   2   2 -10  685.37   14.42
  -2  -2 -10  701.51   12.65
   2   2  -9  391.71    9.91
   2   2  -8   92.32    3.21
   2   2  -7   83.95    3.12
   2   2  -6  573.40    9.95
   2   2  -5  676.34   11.13
   2  -2   5  663.86   10.62
   2  -2   4 1135.12   16.08
   2   2  -4 1113.07   16.20
   2   2  -3 2314.05   28.66
   2  -2   3 2199.45   28.51
   2   2  -2 2090.68   26.31
   2  -2   2 2018.55   26.43
   2  -2   1   64.93    2.82
   2  -2   0 1641.27   22.35
   2  -2  -1   59.84    2.78
   2  -2  -2 2080.10   27.56
   2  -2  -3 2308.96   30.22
   2  -2  -4 1108.19   17.21
   2  -2  -5  668.81   12.37
   2  -2  -6  624.08   12.06
   2  -2  -7   85.23    3.94
   2  -2  -7   77.54    3.10
   2  -2  -8   99.14    3.73
   2  -2  -8   99.21    4.41
   2  -2  -9  393.62    9.70
   2  -2  -9  385.92    8.59
   2  -2 -10  675.68   12.87
   2  -2 -10  688.13   13.86
   2  -2 -11   13.56    1.65
   2  -2 -12  408.58   10.39
   2  -2 -13  514.91   12.53
   2  -2 -14  138.46    6.36
  -2   2 -14  136.17    8.68
   2  -2 -15   85.90    4.95
  -2   2 -15   75.88    6.69
   2  -2 -15   89.07    6.62
   2  -2 -15   81.83    5.12
  -2   2 -16   82.13    7.13
   2  -2 -16   93.66    7.00
   2  -2 -16   90.95    5.20
   2  -2 -17   98.34    7.24
   2  -2 -17   99.66    5.54
  -2   2 -17   86.88    7.35
   2  -2 -18   22.26    2.59
   2  -2 -18   20.93    3.42
  -2   2 -18   18.55    3.76
   2  -2 -19    0.22    1.27
   2  -2 -19    0.96    0.97
  -2   2 -19    1.42    1.73
  -2   2 -20   72.45    6.76
   2  -2 -20   69.10    5.96
   2  -2 -20   69.93    4.35
   2  -2 -21   28.73    2.65
  -2   2 -21   25.54    3.90
   2  -2 -21   35.22    4.15
  -2   2 -22   63.75    6.01
   2  -2 -22   67.67    5.24
  -2   2 -23   35.82    4.27
  -2   2 -24   15.27    2.71
  -2  -3 -25   11.37    1.92
  -2  -3 -24   23.75    3.01
  -2  -3 -23   14.00    2.70
  -2  -3 -22   43.47    4.82
  -2  -3 -21   16.89    3.42
  -2  -3 -20    2.02    1.76
   2   3 -20    4.32    1.94
  -2  -3 -19   26.86    4.36
   2   3 -19   32.25    4.28
   2   3 -18  202.96   10.52
  -2  -3 -18  190.42   11.53
   2   3 -17  322.25   13.21
   2   3 -17  285.51   11.68
  -2  -3 -17  301.55   14.65
   2   3 -16  109.65    7.45
   2   3 -16   92.19    6.26
  -2  -3 -16   93.86    8.06
   2   3 -15  165.44    8.85
   2   3 -15  169.47    8.19
  -2  -3 -15  174.48   10.70
   2   3 -14   72.35    5.03
  -2  -3 -14   80.64    7.20
   2   3 -13   48.85    3.96
   2   3 -12  138.33    6.44
   2   3 -11   26.62    2.70
   2   3 -10  299.39    9.07
  -2  -3 -10  311.05    8.20
   2   3  -9  370.83    9.97
  -2  -3  -9  379.40    9.06
   2  -3   6   42.60    1.97
   2  -3   5  341.97    6.95
   2  -3   4  192.47    5.08
   2  -3   3  805.71   13.04
   2  -3   2 1861.99   25.07
   2  -3   1 2332.28   30.38
   2  -3   0 1079.37   16.54
   2  -3  -1 2326.74   30.52
   2  -3  -2 1839.77   25.39
   2  -3  -3  808.75   13.89
   2  -3  -4  193.05    5.87
   2  -3  -5  335.75    6.21
   2  -3  -5  374.76    8.70
   2  -3  -6   42.66    1.97
   2  -3  -6   47.34    3.00
  -2   3  -7  249.73    6.99
   2  -3  -7  254.37    7.54
   2  -3  -7  242.10    5.55
  -2   3  -8  117.70    4.89
   2  -3  -8  125.02    5.33
   2  -3  -8  112.99    3.83
  -2   3  -9  364.03    9.65
   2  -3  -9  370.32    8.09
   2  -3  -9  388.71   10.17
   2  -3 -10  304.87    9.16
   2  -3 -10  319.45    7.87
   2  -3 -11   25.72    2.58
   2  -3 -11   26.01    2.26
   2  -3 -12  149.66    5.84
   2  -3 -13   48.41    3.44
   2  -3 -14   76.38    4.64
  -2   3 -14   75.38    6.48
  -2   3 -15  189.93   10.63
   2  -3 -15  185.25    9.91
   2  -3 -15  172.08    7.23
  -2   3 -16  110.57    8.35
   2  -3 -16  108.03    7.66
   2  -3 -16  102.66    5.64
   2  -3 -17  311.76   13.34
  -2   3 -17  327.87   14.72
   2  -3 -17  309.42   10.10
   2  -3 -18  189.95    7.70
  -2   3 -18  195.42   11.34
   2  -3 -18  203.27   10.54
  -2   3 -19   38.22    5.01
   2  -3 -19   32.19    4.30
   2  -3 -19   31.50    3.05
   2  -3 -20    1.99    1.01
   2  -3 -20    3.03    1.80
  -2   3 -20    2.07    1.92
   2  -3 -21   22.57    2.44
   2  -3 -21   17.62    2.97
  -2   3 -21   21.64    3.64
  -2   3 -22   45.82    5.07
   2  -3 -22   41.16    4.06
   2  -3 -22   42.49    3.15
  -2   3 -23   17.21    3.10
  -2  -4 -25   -0.40    0.88
  -2  -4 -24  105.41    6.12
  -2  -4 -23   49.45    4.69
  -2  -4 -22    9.16    2.53
  -2  -4 -21    3.20    1.72
  -2  -4 -20    5.70    2.44
  -2  -4 -19   47.51    5.80
   2   4 -19   52.22    5.38
   2   4 -18   16.62    3.27
  -2  -4 -18   14.54    3.65
   2   4 -17  192.88   10.22
  -2  -4 -17  188.39   11.71
   2   4 -16  129.18    7.57
  -2  -4 -16  129.60    9.66
   2   4 -16  148.33    8.83
   2   4 -15  381.08   14.03
  -2  -4 -15  391.11   16.73
  -2  -4 -15  366.49   11.16
   2   4 -15  363.58   12.53
   2   4 -14   13.24    2.33
  -2  -4 -14   12.26    2.97
   2   4 -14   10.30    2.43
   2   4 -13    2.30    1.04
   2   4 -12  171.78    7.43
  -2  -4 -11  438.60   10.97
   2   4 -11  450.87   12.15
   2   4 -10   70.04    4.30
  -2  -4 -10   67.98    3.90
   2   4  -9   31.38    2.78
  -2  -4  -9   30.11    2.56
   2  -4   6 1138.91   16.16
   2  -4   5  532.51    9.68
   2  -4   4 1020.07   15.85
   2  -4   3   81.79    3.52
   2  -4   2   26.79    2.05
   2  -4   1  755.27   13.17
   2  -4   0  262.85    6.80
   2  -4  -1  735.78   13.24
   2  -4  -2   26.73    2.16
   2  -4  -3   79.74    3.82
   2  -4  -4 1019.07   17.01
   2  -4  -4  949.10   11.93
   2  -4  -5  544.74    7.89
   2  -4  -5  561.62   11.85
  -2   4  -6 1124.69   18.09
   2  -4  -6 1128.33   14.94
   2  -4  -6 1162.54   19.59
   2  -4  -7 1101.48   15.27
  -2   4  -7 1072.28   18.25
   2  -4  -8 1395.79   19.03
   2  -4  -8 1382.94   23.12
   2  -4  -9   30.12    2.84
  -2   4  -9   29.45    2.60
   2  -4  -9   36.01    2.18
   2  -4 -10   71.82    4.54
   2  -4 -10   73.34    3.46
  -2   4 -10   69.37    4.18
   2  -4 -11  459.18   12.50
  -2   4 -14   12.47    2.90
   2  -4 -14   16.61    2.23
   2  -4 -15  387.71   14.97
   2  -4 -15  377.38   11.21
  -2   4 -16  127.49    9.00
   2  -4 -16  135.15    6.48
   2  -4 -16  138.83    8.85
   2  -4 -17  193.31    7.91
   2  -4 -17  184.78   10.25
  -2   4 -17  198.35   11.44
   2  -4 -18   15.88    3.08
   2  -4 -18   14.17    2.16
  -2   4 -18   13.30    3.31
  -2   4 -19   43.05    5.32
   2  -4 -19   49.07    5.22
   2  -4 -19   47.48    3.79
   2  -4 -20    7.61    2.22
   2  -4 -20    6.20    1.42
  -2   4 -20    7.89    2.64
   2  -4 -21    8.22    2.09
  -2   4 -21    6.89    2.45
   2  -4 -21    7.59    1.52
  -2   4 -22   13.97    3.10
   2  -4 -22   13.04    1.90
  -2  -5 -25   21.90    2.36
  -2  -5 -24    0.56    0.94
  -2  -5 -23   39.88    4.16
  -2  -5 -22  138.83    8.38
  -2  -5 -21   55.46    5.76
  -2  -5 -20   17.19    3.72
  -2  -5 -19   42.72    5.60
  -2  -5 -18   42.01    4.07
  -2  -5 -18   51.06    6.15
   2   5 -17   73.39    6.59
  -2  -5 -17   63.27    4.81
  -2  -5 -17   74.08    7.49
  -2  -5 -16  125.73    6.64
   2   5 -16  139.60    8.71
  -2  -5 -16  128.48    9.79
   2   5 -16  140.76    7.97
   2   5 -15  375.87   12.96
   2   5 -15  373.80   14.18
  -2  -5 -15  363.87   11.37
  -2  -5 -15  375.45   16.88
   2   5 -14  235.53   10.75
   2   5 -14  242.51    9.87
  -2  -5 -14  237.65    8.74
  -2  -5 -14  250.64   13.31
  -2  -5 -13  358.04   15.77
   2   5 -13  361.01   11.81
   2   5 -12  890.36   19.30
   2   5 -11  118.81    6.08
  -2  -5 -11  111.53    5.56
   2   5 -10  109.57    5.60
  -2  -5 -10  104.95    5.24
   2   5  -9  171.26    6.86
  -2  -5  -9  159.49    6.37
  -2  -5  -8   49.74    3.37
   2  -5   6  490.62    9.21
   2  -5   5  263.38    6.64
   2  -5   4  831.56   14.35
   2  -5   3  608.33   11.80
   2  -5   2 2436.88   32.77
   2  -5   1   15.30    1.69
   2  -5   0  881.52   15.62
   2  -5  -1   14.86    1.71
   2  -5  -2 2377.37   33.05
   2  -5  -3  630.48   12.90
   2  -5  -4  826.58   15.74
  -2   5  -5  252.39    6.75
   2  -5  -5  275.28    8.26
  -2   5  -6  478.10   10.42
   2  -5  -6  500.72   11.93
  -2   5  -7  538.87   11.57
   2  -5  -7  537.57   12.98
  -2   5  -8   48.05    3.24
   2  -5  -8   48.42    3.66
   2  -5  -9  168.47    7.11
  -2   5  -9  165.48    6.46
  -2   5 -10  105.10    5.31
   2  -5 -10   99.79    5.65
   2  -5 -11  113.28    6.27
   2  -5 -12  889.00   19.81
  -2   5 -13  365.57   14.85
   2  -5 -13  371.34   10.78
   2  -5 -14  245.84   11.91
  -2   5 -14  248.12   12.23
   2  -5 -14  235.69    8.58
   2  -5 -15  381.33   11.35
  -2   5 -15  408.86   16.38
   2  -5 -15  393.92   15.47
  -2   5 -16  150.98   10.05
   2  -5 -16  148.77    9.33
   2  -5 -16  150.00    6.92
   2  -5 -17   74.22    6.62
   2  -5 -17   70.09    4.71
  -2   5 -17   74.61    7.23
   2  -5 -18   52.84    4.06
   2  -5 -18   48.25    5.31
  -2   5 -18   52.10    6.14
   2  -5 -19   53.67    5.51
  -2   5 -19   51.97    6.19
   2  -5 -19   52.09    4.00
  -2   5 -20   23.88    4.16
   2  -5 -20   20.02    2.48
   2  -5 -20   14.61    2.93
   2  -5 -21   55.68    3.92
  -2   5 -21   57.27    5.85
   2  -5 -21   60.59    5.11
   2  -5 -22  137.45    5.96
   2  -5 -23   42.64    3.09
  -2  -6 -24   20.16    2.61
  -2  -6 -23   54.55    4.67
  -2  -6 -22  122.36    7.74
  -2  -6 -21    6.90    2.11
  -2  -6 -20   11.85    3.06
  -2  -6 -19   88.77    7.94
  -2  -6 -18   49.29    4.38
  -2  -6 -18   56.37    6.58
  -2  -6 -17   47.17    6.09
  -2  -6 -17   39.89    3.99
  -2  -6 -16  116.44    6.67
  -2  -6 -16  129.07   10.09
  -2  -6 -15  251.77    9.66
  -2  -6 -15  262.01   14.24
   2   6 -15  252.68   10.70
  -2  -6 -14  437.59   12.79
   2   6 -14  453.90   14.14
   2   6 -13  100.12    6.99
   2   6 -13  104.07    6.27
  -2  -6 -13  111.21    5.96
  -2  -6 -12  794.04   17.94
   2   6 -12  788.85   18.31
  -2  -6 -11  126.27    6.34
   2   6 -11  122.83    6.35
   2   6 -10  168.78    7.23
  -2  -6 -10  164.29    7.03
   2   6  -9  139.25    6.35
  -2  -6  -9  137.30    6.23
  -2  -6  -8 1169.79   21.11
  -2  -6  -7   33.00    2.90
   2  -6   6  766.70   13.14
   2  -6   5  256.32    6.99
   2  -6   4  928.92   16.23
   2  -6   3  509.31   11.11
   2  -6   2 1040.79   17.94
   2  -6   1  363.91    9.32
   2  -6   0  615.75   12.91
   2  -6  -1  372.32    9.64
   2  -6  -2 1078.64   19.19
   2  -6  -3  531.34   12.34
   2  -6  -4  911.06   17.70
  -2   6  -5  246.49    6.84
   2  -6  -5  266.77    8.58
  -2   6  -6  764.40   14.34
   2  -6  -6  777.75   16.45
  -2   6  -7   32.34    2.61
   2  -6  -7   33.16    3.18
  -2   6  -8 1165.55   20.38
   2  -6  -8 1170.28   22.39
  -2   6  -9  130.45    5.84
   2  -6  -9  135.41    6.68
   2  -6 -10  168.05    7.74
  -2   6 -10  144.73    6.50
   2  -6 -11  115.58    6.66
   2  -6 -12  771.89   19.11
  -2   6 -13  101.38    7.84
   2  -6 -13  110.46    5.70
   2  -6 -14  458.32   17.08
  -2   6 -14  470.77   17.75
   2  -6 -14  483.70   12.89
   2  -6 -15  273.21   13.03
  -2   6 -15  277.40   13.83
   2  -6 -15  258.74    9.33
  -2   6 -16  134.56    9.88
   2  -6 -16  135.73    6.63
   2  -6 -16  149.45    9.53
   2  -6 -17   48.31    3.95
   2  -6 -17   49.93    5.50
  -2   6 -17   45.10    5.77
  -2   6 -18   65.84    7.21
   2  -6 -18   65.82    6.18
   2  -6 -18   58.58    4.36
  -2   6 -19  101.01    8.67
   2  -6 -19  101.47    7.44
   2  -6 -19   96.40    5.52
   2  -6 -20   16.13    2.93
   2  -6 -20   17.14    2.31
   2  -6 -21    9.01    2.05
   2  -6 -21   10.20    1.81
   2  -6 -22  135.78    5.95
   2  -6 -23   53.92    3.48
  -2  -7 -24   44.00    3.50
  -2  -7 -23   30.62    3.42
  -2  -7 -22   25.60    3.52
  -2  -7 -21  256.64   11.96
  -2  -7 -20   14.17    3.16
  -2  -7 -19    3.31    1.94
  -2  -7 -18   56.66    6.47
  -2  -7 -18   52.08    4.60
  -2  -7 -17   64.69    5.13
  -2  -7 -17   70.11    7.40
  -2  -7 -16   56.34    6.82
  -2  -7 -16   43.21    4.23
  -2  -7 -15  129.66    7.29
  -2  -7 -15  136.84   10.49
   2   7 -15  142.84    8.08
  -2  -7 -14   12.12    2.88
  -2  -7 -14   19.74    2.74
   2   7 -14   21.72    3.18
   2   7 -13  167.14    8.19
  -2  -7 -13  166.42    7.72
  -2  -7 -12  205.52    8.95
   2   7 -12  209.11    8.87
  -2  -7 -12  210.37    8.51
  -2  -7 -11   33.82    3.51
   2   7 -11   38.28    3.59
  -2  -7 -10  144.79    6.98
   2   7 -10  140.33    6.72
   2   7  -9  348.07   10.65
  -2  -7  -9  338.21   10.77
   2   7  -8  105.08    5.50
  -2  -7  -8  105.61    5.66
  -2  -7  -7  152.83    6.60
  -2  -7  -6  248.89    8.39
   2  -7   5 2932.62   39.35
   2  -7   4   97.91    4.64
   2  -7   3   62.88    3.81
   2  -7   2   49.06    3.43
   2  -7   1  600.50   13.49
   2  -7   0  120.93    5.54
   2  -7  -1  621.96   13.96
   2  -7  -5 2861.35   41.82
  -2   7  -6  243.24    7.33
   2  -7  -6  249.03    8.99
   2  -7  -7  153.67    7.21
  -2   7  -7  160.83    6.19
   2  -7  -8  103.74    6.00
  -2   7  -8  104.11    5.18
  -2   7  -9  342.76   10.20
   2  -7  -9  339.85   11.56
  -2   7 -10  147.19    6.70
   2  -7 -10  134.28    7.31
   2  -7 -11   36.67    3.93
  -2   7 -12  178.21   10.54
   2  -7 -12  190.49    9.27
   2  -7 -12  198.97    7.69
  -2   7 -13  160.00   10.18
   2  -7 -13  154.90    9.84
   2  -7 -13  167.00    7.14
   2  -7 -14   14.46    3.26
  -2   7 -14   22.59    4.10
   2  -7 -14   24.70    2.82
  -2   7 -15  137.45   10.05
   2  -7 -15  148.20    6.95
   2  -7 -15  150.66    9.85
   2  -7 -16   52.08    5.78
  -2   7 -16   49.63    6.22
   2  -7 -16   49.22    4.01
   2  -7 -17   71.15    4.87
   2  -7 -17   71.14    6.69
  -2   7 -17   69.71    7.49
   2  -7 -18   58.27    5.81
   2  -7 -18   60.43    4.45
   2  -7 -19    3.13    1.81
   2  -7 -19    5.48    1.42
   2  -7 -20   18.23    3.01
   2  -7 -20   17.09    2.38
   2  -7 -21  249.38    8.65
   2  -7 -22   27.01    2.69
   2  -7 -23   37.26    2.90
  -2  -8 -24    9.60    1.59
  -2  -8 -23    7.68    1.80
  -2  -8 -22   -0.32    1.31
  -2  -8 -21  191.69   10.08
  -2  -8 -20   64.83    6.28
  -2  -8 -19    9.45    2.97
  -2  -8 -18    0.07    1.62
  -2  -8 -17   77.70    5.68
  -2  -8 -17   85.14    8.25
  -2  -8 -16   48.92    6.57
  -2  -8 -16   42.36    4.18
  -2  -8 -15   48.21    4.71
  -2  -8 -15   54.05    6.87
  -2  -8 -14  142.13    7.63
   2   8 -14  152.27    8.19
  -2  -8 -13  196.80    8.84
   2   8 -13  219.31    9.61
  -2  -8 -12  466.69   14.65
  -2  -8 -12  441.19   13.38
   2   8 -12  466.21   14.00
  -2  -8 -11   40.62    4.08
  -2  -8 -11   35.12    3.59
   2   8 -11   36.47    3.65
  -2  -8 -10  188.16    8.52
   2   8 -10  182.86    7.96
  -2  -8  -9  137.51    7.05
   2   8  -9  131.61    6.48
   2   8  -8   30.58    2.99
  -2  -8  -8   30.83    3.26
  -2  -8  -7  160.86    7.21
  -2  -8  -6  143.71    6.58
  -2  -8  -5  160.10    6.85
   2  -8   5  166.01    6.30
   2  -8   4  165.06    6.50
   2  -8   3  545.72   13.04
   2  -8   2  241.24    8.29
   2  -8   1  252.26    8.58
   2  -8   0  817.35   17.20
   2  -8  -1  253.96    8.91
   2  -8  -5  159.02    7.43
  -2  -8   6  144.42    5.18
   2  -8  -6  137.91    7.02
   2  -8  -7  148.73    7.50
  -2   8  -7  155.23    6.24
   2  -8  -8   27.37    3.34
  -2   8  -8   25.99    2.65
  -2   8  -9  144.00    6.56
   2  -8  -9  130.08    7.33
   2  -8 -10  172.33    8.77
   2  -8 -11   34.32    3.94
   2  -8 -11   35.69    3.18
   2  -8 -12  433.05   15.03
   2  -8 -12  458.64   12.35
   2  -8 -13  202.15   10.37
   2  -8 -13  220.76    8.39
   2  -8 -14  159.63    7.21
   2  -8 -14  170.02   10.74
   2  -8 -15   57.03    4.37
   2  -8 -15   56.20    6.27
   2  -8 -16   50.76    5.84
   2  -8 -16   55.35    4.29
   2  -8 -17   93.97    7.57
   2  -8 -17   86.62    5.44
   2  -8 -18    0.28    0.98
   2  -8 -18    0.96    1.28
   2  -8 -19    6.81    2.02
   2  -8 -19    7.40    1.75
   2  -8 -20   55.23    4.93
   2  -8 -20   61.74    4.37
   2  -8 -21  187.60    7.43
   2  -8 -22    0.35    0.77
   2  -8 -23    8.10    1.37
  -2  -9 -23   12.27    1.98
  -2  -9 -22    7.66    1.82
  -2  -9 -21   44.56    4.67
  -2  -9 -20   20.69    3.67
  -2  -9 -19   82.59    7.37
  -2  -9 -18    4.87    2.35
  -2  -9 -17   53.00    6.56
  -2  -9 -16   33.22    5.41
  -2  -9 -16   26.19    3.54
  -2  -9 -15    8.51    2.17
  -2  -9 -15    5.24    2.25
  -2  -9 -14  239.06   10.46
   2   9 -13   73.37    5.56
  -2  -9 -13   56.31    5.14
   2   9 -12    3.24    1.21
  -2  -9 -12    3.44    1.58
  -2  -9 -12    3.60    1.42
  -2  -9 -11  203.87    9.67
  -2  -9 -11  195.40    8.90
   2   9 -11  187.97    8.49
  -2  -9 -10  352.77   11.95
  -2  -9 -10  385.38   13.21
   2   9 -10  357.63   11.68
   2   9  -9  402.38   12.13
  -2  -9  -9  414.99   13.38
   2   9  -8   55.09    4.17
  -2  -9  -8   61.78    4.90
   2   9  -7  216.15    8.21
  -2  -9  -7  220.61    9.00
  -2  -9  -6   68.08    4.81
  -2  -9  -5  111.42    6.00
   2  -9   5  110.17    5.40
  -2  -9  -4  565.83   14.24
   2  -9   4  587.11   13.99
  -2  -9  -3  297.68    9.67
   2  -9   3  301.91    9.84
  -2  -9  -2  735.95   16.21
   2  -9   2  751.44   16.86
  -2  -9  -1  158.22    6.68
   2  -9   1  175.62    7.54
   2  -9   0  121.36    6.33
   2  -9  -1  169.32    7.69
  -2  -9   3  300.52    8.97
  -2  -9   4  566.93   12.69
  -2  -9   5  118.55    5.16
   2  -9  -5  124.74    7.00
   2  -9  -6   68.42    5.28
   2  -9  -7  205.53    9.42
   2  -9  -8   58.42    5.03
   2  -9  -9  393.33   13.78
   2  -9 -10  361.35   13.50
   2  -9 -10  354.35   10.42
   2  -9 -11  182.25    9.69
   2  -9 -11  206.51    7.92
   2  -9 -12    0.35    0.88
   2  -9 -12    3.47    2.20
   2  -9 -13   67.99    6.23
   2  -9 -13   71.34    4.80
   2  -9 -14  274.84    9.84
   2  -9 -14  297.14   14.60
   2  -9 -15    8.35    1.74
   2  -9 -15    8.26    2.60
   2  -9 -16   34.07    3.49
   2  -9 -16   37.72    5.06
   2  -9 -17   46.21    4.04
   2  -9 -17   46.98    5.37
   2  -9 -18    5.29    1.65
   2  -9 -18    3.68    1.57
   2  -9 -19   75.17    4.96
   2  -9 -19   72.26    5.91
   2  -9 -20   17.61    2.49
   2  -9 -21   42.86    3.54
   2  -9 -22    9.02    1.58
  -2 -10 -23   14.76    1.90
  -2 -10 -22   11.95    2.15
  -2 -10 -21   63.04    5.20
  -2 -10 -20   21.76    3.64
  -2 -10 -19   34.88    4.76
  -2 -10 -18   67.15    6.81
  -2 -10 -17  205.48   12.62
  -2 -10 -16  174.94   12.05
  -2 -10 -15   42.67    6.15
  -2  10  14    3.49    1.23
  -2 -10 -14    2.06    1.43
  -2 -10 -13   40.89    4.35
  -2  10  13   54.82    4.16
   2  10 -13   47.21    4.51
  -2 -10 -12   17.06    2.96
   2  10 -12   20.32    2.95
  -2 -10 -12   15.88    3.27
  -2 -10 -11  193.22    9.90
  -2 -10 -11  161.81    8.60
   2  10 -11  184.13    8.55
   2  10 -10   54.86    4.43
  -2 -10 -10   48.57    4.72
  -2 -10 -10   57.69    5.28
  -2 -10  -9  186.03    9.22
   2  10  -9  186.01    8.08
  -2 -10  -9  178.86    8.64
   2  10  -8   32.88    3.25
  -2 -10  -8   35.07    3.86
  -2 -10  -8   29.67    3.70
   2  10  -7  187.80    7.77
  -2 -10  -7  193.26    8.87
  -2 -10  -6  972.21   21.41
   2  10  -6  948.17   19.36
  -2 -10  -5  263.93   10.03
   2 -10   4  256.34    9.26
  -2 -10  -4  265.87    9.83
   2 -10   3  265.65    9.83
  -2 -10  -3  275.78    9.80
   2 -10   2  442.90   13.15
  -2 -10  -2  443.26   12.59
   2 -10   1  110.99    6.54
  -2 -10  -1  107.01    5.79
  -2 -10   0   66.78    4.44
   2 -10   0   67.72    5.08
  -2 -10   1  103.42    5.47
   2 -10  -1  104.62    6.42
   2 -10  -2  445.99   13.93
  -2 -10   2  421.90   11.57
  -2 -10   3  256.88    8.64
   2 -10  -3  267.25   10.69
   2 -10  -4  274.83   10.89
  -2 -10   4  262.20    8.68
   2 -10  -5  270.80   11.00
  -2 -10   5  267.19    8.48
   2 -10  -6  945.18   22.69
   2 -10  -7  198.54    9.67
   2 -10  -8   35.57    4.19
   2 -10  -9  179.36    7.16
   2  10   9  178.55    7.73
   2 -10  -9  173.70    9.48
   2  10  10   59.12    4.54
   2 -10 -10   49.34    5.19
   2 -10 -10   58.79    4.11
   2  10  11  193.28    8.32
   2 -10 -11  167.79    9.81
   2 -10 -11  190.97    7.78
   2 -10 -12   21.01    3.81
   2 -10 -12   21.35    2.69
   2 -10 -13   45.41    5.22
   2 -10 -13   50.08    4.08
   2 -10 -14   -1.40    2.46
   2 -10 -14    1.16    1.12
   2 -10 -15   49.65    6.14
   2 -10 -15   50.10    4.22
   2 -10 -16  185.24   11.16
   2 -10 -16  164.51    7.76
   2 -10 -17  180.34    8.06
   2 -10 -17  197.25   10.97
   2 -10 -18   67.84    6.02
   2 -10 -18   57.20    4.40
   2 -10 -19   33.15    3.32
   2 -10 -20   19.64    2.49
   2 -10 -21   62.97    4.21
   2 -10 -22   12.91    1.76
  -2 -11 -22    5.86    1.51
  -2 -11 -21    6.52    1.70
  -2 -11 -20   21.89    3.33
  -2 -11 -19   10.87    2.57
  -2 -11 -18  104.20    8.33
  -2 -11 -17   19.79    3.98
  -2 -11 -16    8.32    3.06
  -2 -11 -15  125.55   10.32
  -2  11  14   71.63    4.80
  -2  11  13   32.53    3.30
  -2  11  12   88.07    5.39
  -2 -11 -12   88.00    7.10
  -2  11  11  103.86    5.70
  -2 -11 -11  109.64    7.72
   2  11 -11   97.38    6.22
  -2 -11 -10  140.13    8.61
   2  11 -10  133.91    7.17
  -2 -11  -9  381.02   14.08
   2  11  -9  355.07   11.72
  -2 -11  -8   23.69    3.64
   2  11  -8   16.97    2.31
  -2 -11  -8   18.39    3.15
  -2 -11  -7   48.50    5.05
   2  11  -7   47.50    3.88
  -2 -11  -7   43.71    4.46
   2  11  -6    5.85    1.53
  -2 -11  -6    2.64    1.26
   2  11  -5   39.67    3.44
  -2 -11  -5   42.14    4.16
  -2 -11  -4  430.15   13.55
  -2 -11  -3    6.43    1.66
   2 -11   3    4.37    1.56
   2 -11   2   29.50    3.69
  -2 -11  -2   31.29    3.45
  -2 -11  -1  448.15   13.29
   2 -11   1  475.31   14.61
  -2 -11   0  200.03    8.41
   2 -11   0  203.17    9.35
   2 -11  -1  477.22   14.96
  -2 -11   1  460.21   13.09
   2 -11  -2   30.57    3.85
  -2 -11   2   31.63    3.25
   2 -11  -3    8.90    2.09
  -2 -11   3    4.88    1.29
  -2 -11   4  446.74   12.23
   2 -11  -4  450.48   15.11
   2 -11  -5   41.30    4.60
   2  11   6    4.32    1.40
   2 -11  -6    5.49    1.83
   2  11   7   44.62    3.84
   2 -11  -7   49.35    5.04
   2  11   8   18.06    2.58
   2 -11  -8   20.93    2.44
   2 -11  -8   20.17    3.54
   2  11   9  365.47   11.72
   2 -11  -9  368.56   14.60
   2 -11  -9  367.81   10.99
   2  11  10  133.25    7.01
   2 -11 -10  135.41    8.95
   2 -11 -10  133.25    6.54
   2 -11 -11  100.51    7.77
   2  11  11  100.48    6.19
   2 -11 -11  103.65    5.89
   2  11  12   89.76    5.83
   2 -11 -12   86.86    5.51
   2 -11 -12   81.16    7.30
   2 -11 -13   30.98    3.40
   2 -11 -14   63.01    4.86
   2 -11 -14   58.91    6.71
   2 -11 -15  122.55    9.31
   2 -11 -15  121.60    6.77
   2 -11 -16    6.19    1.70
   2 -11 -16    5.86    2.04
   2 -11 -17   19.29    2.74
   2 -11 -17   20.70    3.44
   2 -11 -18  102.83    7.06
   2 -11 -18  101.80    5.92
   2 -11 -19   11.60    2.06
   2 -11 -20   17.61    2.38
   2 -11 -21    4.95    1.35
  -2 -12 -21   17.10    2.36
  -2 -12 -20   40.22    3.98
  -2 -12 -19   45.68    4.82
  -2 -12 -18   14.78    3.28
  -2 -12 -17   29.10    4.57
  -2 -12 -16   79.47    7.80
  -2 -12 -15    9.16    3.11
  -2  12  15   12.31    2.01
  -2  12  14   47.64    3.93
  -2  12  13   85.11    5.32
  -2  12  12  111.51    6.07
  -2  12  11   20.68    2.64
  -2  12  10  110.52    5.96
  -2 -12 -10  120.64    8.30
  -2 -12  -9  109.43    7.87
  -2  12   9   97.41    5.52
  -2 -12  -9  106.30    7.60
  -2 -12  -8   31.81    4.42
  -2 -12  -8   36.70    4.48
  -2 -12  -7  149.51    8.73
  -2 -12  -7  165.44    9.52
  -2 -12  -6   68.10    5.72
  -2 -12  -6   67.58    6.03
  -2 -12  -5  352.06   13.70
  -2 -12  -5  349.17   12.95
  -2 -12  -4   41.74    4.21
   2 -12   3  453.80   14.35
  -2 -12  -3  463.50   14.68
  -2 -12  -2  527.33   15.44
   2 -12   2  533.76   16.18
   2 -12   1  120.06    7.49
  -2 -12  -1  117.13    6.86
  -2 -12   0    2.35    0.87
   2 -12   0    3.44    1.69
   2 -12  -1  122.29    7.73
  -2 -12   1  121.05    6.73
   2 -12  -2  532.08   16.92
   2  12   2  507.02   13.74
  -2 -12   2  525.00   14.66
  -2 -12   3  478.36   13.67
   2 -12  -3  462.13   15.91
   2  12   4   42.36    3.85
   2 -12  -4   44.87    4.96
   2 -12  -5  355.37   14.08
   2  12   5  328.14   10.98
   2 -12  -6   65.49    6.11
   2  12   6   62.48    4.72
   2 -12  -7  156.50    6.87
   2  12   7  141.11    7.10
   2 -12  -7  136.84    9.01
   2  12   8   29.89    3.41
   2 -12  -8   28.14    3.05
   2 -12  -8   23.68    4.03
   2  12   9   99.23    6.09
   2 -12  -9  104.68    5.88
   2 -12  -9  100.74    7.95
   2 -12 -10  115.32    6.29
   2  12  10  115.24    6.62
   2 -12 -10  112.38    8.42
   2  12  11   17.74    2.69
   2 -12 -11   22.09    2.93
   2 -12 -12  112.18    6.48
   2  12  12  117.19    6.79
   2 -12 -13   91.54    5.94
   2 -12 -14   46.90    4.29
   2 -12 -14   43.26    5.84
   2 -12 -15   13.41    2.41
   2 -12 -15    9.73    2.83
   2 -12 -16   79.14    5.47
   2 -12 -16   84.33    7.07
   2 -12 -17   22.20    3.53
   2 -12 -17   24.94    3.11
   2 -12 -18   14.76    2.33
   2 -12 -19   43.72    3.71
   2 -12 -20   33.71    3.09
  -2 -13 -20    5.07    1.37
  -2 -13 -19    2.78    1.41
  -2 -13 -18   41.13    4.66
  -2 -13 -17    1.57    1.68
  -2 -13 -16   17.59    3.85
  -2 -13 -15  102.43    9.08
  -2  13  15  104.95    5.56
  -2  13  14  117.36    6.14
  -2  13  13   31.86    3.26
  -2  13  12   45.57    3.97
  -2  13  11    9.77    1.90
  -2  13  10  128.33    6.52
  -2 -13  -9   13.98    3.13
  -2  13   9   12.30    2.11
  -2  13   8   24.49    2.87
  -2 -13  -8   23.61    3.75
  -2 -13  -8   22.15    3.90
  -2  13   7  212.31    8.32
  -2 -13  -7  239.07   11.53
  -2 -13  -7  246.45   11.97
  -2 -13  -6   40.48    4.88
  -2  13   6   39.09    3.56
  -2 -13  -6   46.98    5.04
  -2 -13  -5   39.74    4.58
  -2  13   5   39.36    3.48
  -2 -13  -5   45.52    5.23
  -2 -13  -4  150.73    8.72
  -2  13   4  140.92    6.57
   2  13  -3   13.02    2.34
  -2  13   3   13.08    2.10
  -2 -13  -3   12.55    2.62
   2  13  -2  285.01   10.35
  -2 -13  -2  284.90   11.74
  -2  13   2  284.46    9.41
   2 -13   2  294.48   12.10
  -2 -13  -1   78.39    6.00
   2  13  -1   75.17    5.25
  -2  13   1   69.31    4.52
   2 -13   1   73.36    6.22
  -2 -13   0   69.95    5.52
   2  13   0   63.77    4.84
  -2  13   0   66.70    4.33
   2 -13   0   59.83    5.70
   2  13   1   73.35    5.25
  -2 -13   1   74.39    5.79
   2 -13  -1   68.73    6.08
  -2  13  -1   71.94    4.41
  -2 -13   2  299.09   11.40
   2  13   2  290.63   10.47
  -2  13  -2  273.00    8.93
   2 -13  -2  300.95   12.94
   2  13   3   13.39    2.48
   2 -13  -3   13.49    3.21
  -2 -13   3   17.03    2.76
   2  13   4  143.80    7.29
   2 -13  -4  148.34    9.36
   2  13   5   42.46    4.06
   2 -13  -5   43.24    5.16
   2  13   6   43.64    4.09
   2 -13  -6   40.61    5.11
   2 -13  -7  235.74    9.00
   2  13   7  206.50    8.96
   2 -13  -7  223.20   11.89
   2  13   8   21.04    3.00
   2 -13  -8   22.50    3.85
   2 -13  -8   20.56    2.78
   2 -13  -9   14.33    2.40
   2  13   9   13.08    2.46
   2  13  10  119.79    6.86
   2 -13 -10  141.51    7.36
   2 -13 -11    9.24    2.07
   2  13  11    9.23    2.11
   2 -13 -12   44.22    4.34
   2  13  12   52.43    4.57
   2  13  13   25.71    3.16
   2 -13 -13   32.01    3.72
   2 -13 -14  105.74    8.63
   2 -13 -14  105.34    6.62
   2 -13 -15  109.06    6.54
   2 -13 -15   91.38    7.53
   2 -13 -16   16.72    3.14
   2 -13 -16   16.10    2.60
   2 -13 -17    1.32    1.15
   2 -13 -18   41.50    3.70
  -2 -14 -19   17.03    2.46
  -2 -14 -18   14.10    2.62
  -2 -14 -17   11.91    2.69
  -2 -14 -16    1.68    1.57
  -2  14  15   43.26    3.46
  -2 -14 -15   34.64    5.35
  -2  14  14   86.49    5.18
  -2  14  13   31.50    3.26
  -2  14  12   49.56    4.10
  -2  14  11   65.36    4.70
  -2  14  10   74.60    5.03
  -2 -14 -10   77.48    6.63
  -2 -14  -9   19.74    3.56
  -2  14   9   21.41    2.75
  -2 -14  -8   51.52    5.60
  -2  14   8   44.14    3.85
  -2 -14  -7   29.87    4.48
  -2  14   7   29.76    3.20
  -2 -14  -6  158.35    9.95
  -2  14   6  156.74    7.18
  -2  14   5  181.94    7.78
  -2 -14  -5  194.30   10.75
  -2 -14  -5  199.66   10.59
  -2 -14  -4   12.12    2.98
  -2  14   4    8.85    1.94
  -2 -14  -4    8.58    2.40
   2  14  -3  439.98   13.59
  -2  14   3  454.54   12.60
  -2 -14  -3  481.67   16.54
   2  14  -2  260.29   10.17
  -2  14   2  243.10    8.92
  -2 -14  -2  257.18   11.73
   2  14  -1  359.95   12.22
  -2  14   1  346.67   10.74
  -2 -14  -1  368.33   13.97
   2 -14   1  352.28   14.22
   2  14   0   46.97    4.43
  -2  14   0   33.99    3.37
  -2 -14   0   35.45    4.26
   2 -14   0   37.72    4.96
   2  14   1  352.38   12.08
  -2 -14   1  361.33   13.44
   2 -14  -1  359.41   14.68
  -2  14  -1  327.94   10.34
   2  14   2  258.01   10.20
  -2  14  -2  241.98    8.58
  -2 -14   2  256.05   11.02
   2 -14  -2  240.34   12.24
   2 -14  -3  464.92   17.33
   2  14   3  466.92   14.11
   2  14   4    9.77    2.08
   2 -14  -4   11.11    2.89
   2  14   5  183.76    8.54
   2 -14  -5  201.44   11.35
   2  14   6  153.64    7.81
   2  14   7   29.65    3.46
   2 -14  -8   51.33    4.52
   2  14   8   51.67    4.48
   2 -14  -9   19.76    2.92
   2  14   9   20.20    2.92
   2  14  10   72.54    5.39
   2 -14 -10   77.90    5.70
   2  14  11   69.38    5.25
   2 -14 -11   67.61    5.43
   2  14  12   44.92    4.14
   2 -14 -12   50.82    4.72
   2  14  13   23.08    2.85
   2 -14 -13   31.38    3.75
   2 -14 -14   86.17    6.08
   2 -14 -14   73.91    6.82
   2 -14 -15   33.15    4.36
   2 -14 -15   41.98    4.13
   2 -14 -16    3.29    1.44
   2 -14 -17   13.17    2.24
  -2 -15 -18    8.67    1.82
  -2 -15 -17   38.95    4.12
  -2 -15 -16   44.07    4.89
  -2 -15 -15   23.16    4.01
  -2  15  15   23.85    2.49
  -2  15  14   11.17    1.93
  -2  15  13   31.38    3.12
  -2  15  12   88.59    5.34
  -2  15  11   49.70    4.10
  -2 -15 -10    0.65    1.39
  -2  15  10    1.33    1.02
  -2  15   9   65.81    4.71
  -2 -15  -9   68.39    6.27
  -2 -15  -8   13.27    3.04
  -2  15   8   15.32    2.41
  -2 -15  -7   11.41    2.93
  -2  15   7    8.65    1.87
  -2 -15  -6  168.03   10.30
  -2  15   6  153.56    7.22
  -2 -15  -5   17.82    3.48
  -2  15   5   19.86    2.67
  -2  15   4   27.39    3.16
  -2 -15  -4   31.23    4.65
  -2  15   3   76.23    5.05
  -2 -15  -3   76.57    6.95
   2  15  -2  227.63    9.74
  -2  15   2  232.29    8.91
   2  15  -1   41.39    4.19
  -2  15   1   38.76    3.66
   2  15   0  106.00    6.66
  -2  15   0  100.23    5.67
   2 -15   0   97.77    7.84
  -2  15  -1   32.37    3.22
   2  15   1   41.47    4.17
   2  15   2  232.42    9.91
  -2  15  -2  223.56    8.43
   2  15   3   70.83    5.38
   2  15   4   30.90    3.59
   2  15   5   23.62    3.25
   2  15   6  154.03    7.92
   2  15   7   10.02    2.22
   2  15   8   13.10    2.36
   2 -15  -9   66.22    5.45
   2  15   9   65.73    5.11
   2 -15 -10    1.75    1.27
   2  15  10    3.67    1.47
   2 -15 -11   51.70    4.79
   2  15  11   48.79    4.30
   2  15  12   93.74    5.79
   2 -15 -12   98.10    6.46
   2 -15 -13   32.95    3.73
   2 -15 -14    8.95    2.14
   2 -15 -14    7.84    2.37
  -2 -16 -17    1.36    0.86
  -2 -16 -16    7.24    1.98
  -2  16  15   61.17    3.67
  -2 -16 -15   56.98    5.44
  -2  16  14   40.07    3.21
  -2 -16 -14   31.57    4.82
  -2  16  13   17.07    2.27
  -2  16  12   53.80    4.02
  -2  16  11   15.43    2.30
  -2  16  10    9.46    1.87
  -2 -16 -10    7.72    2.06
  -2  16   9   71.62    4.87
  -2 -16  -9   71.80    6.12
  -2  16   8   46.18    3.98
  -2 -16  -8   44.08    5.13
  -2  16   7   82.51    5.37
  -2 -16  -7   86.39    7.22
  -2  16   6   39.79    3.70
  -2 -16  -6   41.20    5.34
  -2  16   5   60.41    4.56
  -2 -16  -5   61.22    6.25
  -2 -16  -4  301.44   13.89
  -2  16   4  277.25    9.97
  -2 -16  -3   43.12    5.44
  -2  16   3   37.69    3.65
  -2  16   2   32.79    3.42
  -2 -16  -2   33.79    4.82
  -2 -16  -1    8.40    2.71
   2  16  -1    4.17    1.70
  -2  16   1    6.45    1.74
   2  16   0   89.92    6.06
  -2  16   0   85.71    5.38
  -2  16  -1    5.76    1.56
   2  16   1    7.23    2.05
   2  16   2   31.73    3.80
  -2  16  -2   30.27    3.13
   2  16   3   36.87    4.00
   2  16   4  282.96   10.99
   2  16   5   59.00    4.95
   2  16   6   37.70    3.96
  -2 -16   7   74.32    6.71
   2  16   7   81.15    5.62
  -2 -16   8   30.51    4.50
   2  16   8   42.62    4.09
   2  16   9   73.42    5.29
   2  16  10    3.84    1.46
   2  16  11   17.67    2.59
   2 -16 -13    7.36    2.10
  -2 -17 -16    7.93    1.59
  -2 -17 -15   17.77    2.75
  -2 -17 -14    4.52    1.83
  -2  17  14    7.68    1.41
  -2  17  13   66.46    4.01
  -2  17  12   36.56    3.16
  -2  17  11   23.91    2.65
  -2  17  10   70.22    4.61
  -2 -17  -9   20.31    3.20
  -2  17   9   20.50    2.59
  -2 -17  -8   13.04    2.75
  -2  17   8   10.65    1.91
  -2 -17  -7   32.28    4.25
  -2  17   7   36.46    3.50
  -2 -17  -6    8.45    2.59
  -2  17   6    5.45    1.65
  -2  17   5   39.90    3.76
  -2 -17  -5   38.85    4.94
  -2 -17  -4   25.09    4.18
  -2  17   4   21.65    2.78
  -2 -17  -3   89.57    7.53
  -2  17   3   86.91    5.46
  -2  17   2   24.73    3.01
  -2 -17  -2   28.06    4.45
  -2 -17  -1  116.19    8.61
  -2  17   1  109.46    6.11
  -2 -17   0   64.72    6.41
  -2  17   0   59.80    4.42
   2  17   1  112.37    6.78
  -2  17  -1  119.47    6.16
  -2 -17   1  115.00    8.50
   2  17   2   22.54    3.09
  -2 -17   2   26.85    4.16
  -2  17  -2   20.53    2.57
  -2 -17   3   76.73    6.84
   2  17   3   81.14    5.72
  -2 -17   4   21.44    3.74
   2  17   4   22.31    3.08
   2  17   5   38.45    3.91
  -2 -17   5   36.62    4.78
  -2 -17   6    5.90    2.35
   2  17   6    4.19    1.53
  -2 -17   7   28.42    4.01
   2  17   7   35.43    3.69
  -2 -17   8   12.33    2.76
   2  17   8    9.87    2.06
   2  17   9   20.35    2.78
  -2 -18 -14    0.60    0.99
  -2  18  13   37.21    2.72
  -2 -18 -13   19.24    3.12
  -2  18  12   15.62    2.01
  -2  18  11   55.09    3.71
  -2  18  10   36.96    3.18
  -2  18   9   21.54    2.53
  -2 -18  -9   17.76    2.71
  -2 -18  -8   39.85    4.24
  -2  18   8   39.62    3.43
  -2 -18  -7   20.03    3.17
  -2  18   7   18.81    2.48
  -2 -18  -6    3.55    1.82
  -2  18   6    1.96    1.15
  -2 -18  -5   59.31    5.80
  -2  18   5   51.60    4.10
  -2 -18  -4   30.92    4.31
  -2  18   4   26.14    3.05
  -2 -18  -3  103.51    7.75
  -2  18   3  106.53    5.86
  -2 -18  -2   10.39    2.88
  -2  18   2    8.73    1.96
  -2 -18  -1   31.81    4.54
  -2  18   1   22.86    2.80
  -2 -18   0   86.76    7.24
  -2  18   0   77.82    4.89
  -2  18  -1   25.89    2.93
  -2 -18   1   28.74    4.38
  -2 -18   2    9.29    2.76
  -2 -18   3   84.39    6.98
  -2 -18   4   27.69    4.03
  -2 -18   5   48.83    5.14
  -2 -18   6    3.29    1.66
  -2 -18   7   16.11    2.91
   2 -18  -7   19.53    2.95
  -2 -18   8   28.18    3.54
  -2  19  12   26.71    2.19
  -2 -19 -12   10.23    2.09
  -2  19  11   18.58    2.03
  -2  19  10   12.02    1.82
  -2 -19  -9   34.98    3.26
  -2  19   9   37.93    3.04
  -2  19   8   41.38    3.32
  -2 -19  -8   36.95    3.58
  -2  19   7    4.36    1.30
  -2 -19  -7    4.28    1.52
  -2  19   6    2.39    1.10
  -2 -19  -6    0.24    0.94
  -2  19   5    5.83    1.52
  -2 -19  -5    6.35    2.10
  -2  19   4   95.66    5.36
  -2 -19  -4  113.69    7.50
  -2  19   3   64.00    4.39
  -2 -19  -3   65.68    5.96
  -2  19   2   25.77    2.86
  -2 -19  -2   25.16    3.86
  -2  19   1   37.52    3.30
  -2 -19  -1   46.86    5.07
  -2 -19   0   29.53    4.08
  -2  19   0   26.42    2.77
  -2 -19   1   39.83    4.68
  -2  19  -1   36.75    3.15
  -2 -19   2   30.88    4.06
  -2 -19   3   56.05    5.30
  -2 -19   4   95.44    6.74
  -2 -19   5    2.89    1.59
  -2 -19   6    1.04    0.94
   2 -19  -6    1.16    1.03
  -2 -19   7    3.15    1.38
  -2 -19   8   33.42    3.35
  -2  20  10   27.03    2.18
  -2  20   9    4.72    1.13
  -2  20   8   18.65    2.06
  -2 -20  -8   15.43    2.01
  -2  20   7   69.94    4.01
  -2 -20  -7   61.19    4.21
  -2 -20  -6   15.19    2.34
  -2  20   6   15.62    1.97
  -2 -20  -5    6.31    1.71
  -2  20   5    7.35    1.46
  -2 -20  -4   19.24    2.87
  -2  20   4   22.57    2.42
  -2  20   3   46.63    3.44
  -2 -20  -3   48.75    4.61
  -2 -20  -2    8.22    2.16
  -2  20   2    9.09    1.72
  -2  20   1   41.26    3.16
  -2 -20  -1   51.60    4.84
  -2  20   0   39.31    3.00
  -2 -20   0   38.76    4.25
  -2 -20   1   48.66    4.79
  -2 -20   2    7.92    2.07
  -2 -20   3   43.13    4.23
  -2 -20   4   15.89    2.55
   2 -20  -4   18.64    2.78
  -2 -20   5    6.73    1.67
   2 -20  -5    8.18    1.82
  -2 -20   6   11.93    2.02
  -2 -20   7   52.63    3.82
  -2  21   7   11.52    1.44
   2 -21   6    1.26    0.93
  -2  21   6    1.54    0.81
  -2 -21  -5    1.80    1.00
   2 -21   5    3.76    1.30
  -2  21   5    2.16    0.92
  -2  21   4   81.77    4.02
  -2 -21  -4   81.55    4.93
  -2 -21  -3   10.25    1.94
  -2  21   3    8.36    1.48
  -2 -21  -2    5.96    1.61
  -2 -21  -1  108.05    6.17
   2 -21   0  116.70    6.56
  -2 -21   0  103.57    6.03
  -2 -21   1  101.00    5.84
   2 -21  -1  108.39    6.19
  -2 -21   2    7.15    1.75
   2 -21  -2    8.20    1.85
  -2 -21   3    9.25    1.86
   2 -21  -3   13.92    2.25
   2 -21  -4   74.57    4.49
  -2 -21   4   74.22    4.52
  -2 -21   5    3.14    0.95
   3   0   0    0.73    0.52
   3   0  -1   39.26    2.45
   3   0   1   41.83    2.53
   3   0  -2 1861.89   25.72
   3   0   2 1808.96   25.58
   3   0   3   80.07    3.48
   3   0  -3   80.15    3.60
   3   0  -4   11.03    1.39
   3   0   4    9.65    1.20
   3   0  -5  108.75    4.46
   3   0  -6   96.24    4.20
   3   0  -7    0.30    0.56
   3   0  -8  369.90    9.16
   3   0  -9   23.01    2.17
   3   0 -10   45.77    3.30
   3   0 -10   44.35    2.99
   3   0 -11   46.61    3.43
   3   0 -12    4.32    1.18
   3   0 -13  241.24    8.73
   3   0 -14  340.62   10.91
   3   0 -14  352.16   11.01
  -3   0 -14  335.24   14.38
   3   0 -15  140.41    6.82
  -3   0 -15  148.77    9.65
   3   0 -15  141.63    7.15
  -3   0 -16   73.09    6.86
   3   0 -16   80.65    5.64
   3   0 -16   83.56    5.26
  -3   0 -17  223.95   12.23
   3   0 -17  221.62    8.63
  -3   0 -18    4.52    2.04
   3   0 -18   13.01    2.10
  -3   0 -19  544.65   19.28
   3   0 -19  608.83   14.44
  -3   0 -20    5.08    2.22
   3   0 -20    7.66    1.58
  -3   0 -21    4.70    2.10
  -3   0 -22   45.54    4.93
  -3   0 -23    7.14    2.31
  -3   0 -24  119.65    6.64
  -3   0 -25   46.39    3.78
  -3  -1 -25   45.49    3.61
  -3  -1 -24   17.13    2.65
  -3  -1 -23   27.96    3.59
  -3  -1 -22   20.74    3.37
  -3  -1 -21   33.12    4.49
  -3  -1 -20   55.95    5.94
  -3  -1 -19   57.65    6.21
  -3  -1 -18   82.23    7.42
   3   1 -18  109.38    5.76
   3   1 -17  375.74   13.28
  -3  -1 -17  395.52   16.49
   3   1 -17  420.69   12.13
   3   1 -16  222.10    8.68
   3   1 -16  200.07    9.21
  -3  -1 -16  197.60   11.46
   3   1 -15   36.91    3.48
  -3  -1 -15   32.30    4.74
   3   1 -15   38.43    3.85
   3   1 -14  412.84   12.02
   3   1 -14  401.07   12.32
  -3  -1 -14  408.98   16.08
   3   1 -13   79.37    5.02
   3   1 -12   76.24    4.74
   3   1 -11  387.31   10.90
   3   1 -10  255.72    8.45
   3   1  -9  575.10   11.62
   3   1  -8  181.10    5.96
   3   1  -7  370.45    8.91
   3   1  -6  477.17   10.23
   3  -1   5  920.85   15.20
   3   1  -5  929.09   15.70
   3   1  -4  201.99    6.01
   3  -1   4  226.22    6.15
   3   1  -3 1590.75   22.85
   3  -1   3 1554.05   22.78
   3  -1   2  158.45    5.12
   3   1  -2  154.18    5.01
   3   1  -1 1884.15   25.97
   3  -1   1 1869.32   26.06
   3  -1   0  177.01    5.50
   3   1   0  192.36    5.61
   3   1   1 1895.71   26.13
   3  -1  -1 1883.68   26.33
   3  -1  -2  144.14    5.00
   3   1   2  150.87    4.87
   3  -1  -3 1541.06   22.94
   3  -1  -4  221.69    6.58
   3  -1  -5  901.46   15.80
   3  -1  -6  488.83   10.94
   3  -1  -7  367.52    9.39
   3  -1  -8  177.45    6.32
   3  -1  -9  586.54   12.36
   3  -1  -9  563.30   12.48
   3  -1 -10  245.95    7.62
   3  -1 -10  250.67    7.93
   3  -1 -11  386.02   10.18
   3  -1 -12   70.95    4.26
   3  -1 -13   91.65    5.08
   3  -1 -14  434.63   12.33
  -3   1 -14  411.12   15.73
   3  -1 -14  407.94   11.89
  -3   1 -15   34.54    4.53
   3  -1 -15   36.02    3.49
   3  -1 -15   39.53    3.70
   3  -1 -16  217.56    8.62
  -3   1 -16  206.87   11.49
  -3   1 -17  414.48   16.69
   3  -1 -17  423.39   12.38
  -3   1 -18   92.99    7.72
   3  -1 -18  103.96    5.79
  -3   1 -19   64.61    6.57
   3  -1 -19   61.52    4.31
  -3   1 -20   58.93    6.13
   3  -1 -20   57.51    4.00
  -3   1 -21   31.62    4.33
   3  -1 -21   39.05    3.05
  -3   1 -22   19.22    3.52
  -3   1 -23   30.04    3.78
  -3   1 -24   26.48    3.92
  -3  -2 -25    8.07    1.50
  -3  -2 -24    2.57    1.36
  -3  -2 -23  144.26    7.98
  -3  -2 -22   20.60    3.37
  -3  -2 -21  120.60    8.32
  -3  -2 -20  103.08    8.02
  -3  -2 -19   21.93    3.96
  -3  -2 -18  161.27   10.46
  -3  -2 -17  733.75   23.31
   3   2 -16  199.56    9.33
  -3  -2 -16  206.28   11.86
   3   2 -16  217.24    8.49
   3   2 -15   66.03    4.60
  -3  -2 -15   69.63    6.78
   3   2 -15   72.31    5.36
  -3  -2 -14  353.40   15.22
   3   2 -14  372.79   11.19
   3   2 -14  349.08   11.72
   3   2 -13  413.92   12.37
   3   2 -12   92.54    5.43
   3   2 -11   86.63    5.08
   3   2 -10  691.84   15.55
   3   2  -9  474.78    9.88
   3   2  -8  633.11   12.08
   3   2  -7 1042.67   17.11
   3  -2   6  239.35    6.24
   3   2  -6  223.50    6.51
   3  -2   5  132.90    4.65
   3   2  -5  130.01    4.74
   3  -2   4  396.63    8.98
   3   2  -4  415.33    9.05
   3  -2   3   27.58    2.12
   3   2  -3   23.56    1.92
   3  -2   2  456.00    9.65
   3   2  -2  405.14    9.02
   3  -2   1  285.03    7.30
   3   2  -1  257.63    6.77
   3  -2   0  656.68   12.28
   3   2   0  614.19   11.59
   3  -2  -1  278.60    7.38
   3  -2  -2  449.43    9.99
   3  -2  -3   24.23    2.20
   3  -2  -4  401.05    9.72
   3  -2  -5  125.16    5.24
   3  -2  -6  247.35    7.57
   3  -2  -7 1128.49   19.69
   3  -2  -8  621.39   12.07
   3  -2  -8  629.95   13.77
   3  -2  -9  470.25   10.36
   3  -2  -9  486.39   11.96
   3  -2 -10  675.52   14.66
   3  -2 -10  647.78   13.12
   3  -2 -11   85.41    4.74
   3  -2 -11   83.90    4.28
   3  -2 -12   91.57    4.68
   3  -2 -13  440.23   11.59
   3  -2 -14  373.02   11.43
  -3   2 -14  376.90   15.04
   3  -2 -15   66.23    4.65
  -3   2 -15   67.61    6.61
  -3   2 -16  211.64   11.76
   3  -2 -16  214.88    8.65
  -3   2 -17  786.32   23.49
   3  -2 -17  756.45   17.55
  -3   2 -18  149.96    9.86
   3  -2 -18  165.59    7.38
  -3   2 -19   25.35    4.20
   3  -2 -19   25.96    2.85
  -3   2 -20  103.95    8.02
   3  -2 -20  117.76    5.75
  -3   2 -21  110.65    7.99
   3  -2 -21  119.19    5.49
   3  -2 -22   21.30    2.15
  -3   2 -22   18.55    3.39
  -3   2 -23  148.20    8.18
  -3  -3 -25    0.21    0.75
  -3  -3 -24   16.44    2.47
  -3  -3 -23   14.37    2.60
  -3  -3 -22   59.27    5.41
  -3  -3 -21    1.33    1.54
  -3  -3 -20   92.24    7.70
  -3  -3 -19   17.28    3.42
  -3  -3 -18  178.18   11.15
  -3  -3 -17    7.50    2.95
  -3  -3 -16   11.31    3.03
   3   3 -16    9.44    2.22
  -3  -3 -15  251.12   13.15
   3   3 -15  255.89   10.44
  -3  -3 -14  742.04   23.01
   3   3 -14  727.26   18.16
   3   3 -13  212.82    8.87
   3   3 -12   81.77    5.21
   3   3 -11   24.77    2.76
   3   3 -10  241.47    8.79
   3  -3   6 1454.95   21.40
   3  -3   5  162.05    5.38
   3  -3   4  203.56    6.17
   3  -3   3  349.59    8.46
   3  -3   2  688.07   13.23
   3  -3   1   69.27    3.61
   3  -3   0  258.73    7.35
   3  -3  -1   70.36    3.73
   3  -3  -2  696.53   13.70
   3  -3  -3  365.65    9.37
   3  -3  -4  209.74    6.92
   3  -3  -5  154.88    6.06
   3  -3  -6 1502.77   24.63
   3  -3  -7  127.53    4.30
   3  -3  -7  147.84    6.19
   3  -3  -8  491.75    9.81
   3  -3  -8  501.48   12.56
   3  -3  -9   51.80    3.83
   3  -3  -9   54.12    2.93
   3  -3 -10  242.47    8.68
   3  -3 -10  237.28    6.88
   3  -3 -11   24.05    2.83
   3  -3 -11   22.34    2.11
   3  -3 -14  771.01   17.50
  -3   3 -14  770.50   22.32
  -3   3 -15  279.26   13.20
   3  -3 -15  262.40    9.58
   3  -3 -16   11.30    2.13
  -3   3 -16    8.41    2.62
   3  -3 -17    7.68    1.90
  -3   3 -17    3.61    1.98
  -3   3 -18  165.40   10.37
   3  -3 -18  179.28    7.73
   3  -3 -19   22.20    2.72
  -3   3 -19   17.41    3.62
  -3   3 -20   92.65    7.46
   3  -3 -20  101.07    5.38
   3  -3 -21    0.40    0.66
  -3   3 -21   -1.07    1.35
  -3   3 -22   62.61    5.68
   3  -3 -22   63.50    3.74
  -3   3 -23   14.49    2.76
  -3  -4 -25    8.61    1.47
  -3  -4 -24   14.84    2.29
  -3  -4 -23    5.75    1.77
  -3  -4 -22   16.76    2.94
  -3  -4 -21  147.90    9.08
  -3  -4 -20   51.99    5.73
  -3  -4 -19   34.99    5.03
  -3  -4 -18   83.81    7.68
  -3  -4 -17   20.76    4.13
   3   4 -16   22.00    3.23
  -3  -4 -16   20.03    3.95
  -3  -4 -15   59.72    6.57
   3   4 -15   53.47    4.83
  -3  -4 -14   29.94    4.69
   3   4 -14   29.46    3.52
  -3  -4 -13   86.71    7.60
   3   4 -13   90.93    5.86
   3   4 -12  220.14    9.00
   3   4 -11   83.59    5.31
  -3  -4 -11   84.43    4.80
   3   4 -10  148.08    6.94
   3  -4   7   91.87    3.66
   3  -4   6   80.85    3.66
   3  -4   5  727.17   13.56
   3  -4   4  158.13    5.60
   3  -4   3  191.79    6.33
   3  -4   2  410.09    9.84
   3  -4   1   27.50    2.41
   3  -4   0  833.54   15.62
   3  -4  -1   23.93    2.30
   3  -4  -2  414.06   10.33
   3  -4  -3  193.33    6.90
   3  -4  -4  159.53    6.32
   3  -4  -5  706.69   15.25
   3  -4  -6   78.25    2.83
   3  -4  -6   79.39    4.71
   3  -4  -7   95.04    5.24
   3  -4  -7   93.52    3.28
   3  -4  -8  112.42    5.89
   3  -4  -8  104.81    3.67
   3  -4  -9  166.11    7.37
   3  -4 -10  159.87    7.38
   3  -4 -11   78.89    5.27
   3  -4 -13   90.68    5.32
  -3   4 -13   84.76    6.82
   3  -4 -14   30.46    3.20
  -3   4 -14   28.99    4.26
   3  -4 -15   52.60    4.25
  -3   4 -15   59.69    6.17
  -3   4 -16   19.27    3.75
   3  -4 -16   20.32    2.54
   3  -4 -17   22.03    2.77
  -3   4 -17   27.40    4.37
  -3   4 -18   80.97    7.46
   3  -4 -18   89.35    5.38
  -3   4 -19   39.28    5.21
   3  -4 -19   37.22    3.40
  -3   4 -20   54.98    5.87
   3  -4 -20   57.37    4.09
  -3   4 -21  160.28    9.63
   3  -4 -21  149.17    6.33
  -3   4 -22   17.61    3.15
   3  -4 -22   12.82    1.73
   3  -4 -23    5.22    1.14
  -3  -5 -24   14.80    2.24
  -3  -5 -23   96.00    6.04
  -3  -5 -22    6.25    1.97
  -3  -5 -21   42.81    4.91
  -3  -5 -20    2.27    2.09
  -3  -5 -19  289.54   14.08
  -3  -5 -18  359.20   16.22
  -3  -5 -17   44.60    5.82
  -3  -5 -16   48.50    6.22
  -3  -5 -15   59.33    6.76
   3   5 -15   60.00    5.17
  -3  -5 -14  381.77   12.20
  -3  -5 -14  387.93   17.09
   3   5 -14  374.13   13.08
  -3  -5 -13   30.36    4.55
  -3  -5 -13   27.69    3.18
   3   5 -13   32.67    3.59
   3   5 -12  111.62    6.49
   3   5 -11   29.17    3.25
  -3  -5 -11   35.58    3.29
   3   5 -10  129.20    6.70
  -3  -5 -10  141.45    6.49
   3  -5   6  154.29    5.34
   3  -5   5  195.57    6.37
   3  -5   4  823.77   15.68
   3  -5   3  384.94    9.93
   3  -5   2 1061.01   18.96
   3  -5   1  328.73    9.25
   3  -5   0 1933.17   29.39
   3  -5  -1  335.73    9.52
   3  -5  -2 1055.07   19.50
   3  -5  -3  374.61   10.47
   3  -5  -4  830.88   17.17
   3  -5  -5  194.97    7.54
   3  -5  -6  160.44    7.02
   3  -5  -7  241.45    9.01
   3  -5  -8   83.03    5.23
   3  -5  -9   68.60    4.92
   3  -5 -10  136.05    7.16
   3  -5 -11   37.43    3.89
   3  -5 -12  119.13    6.90
  -3   5 -13   25.36    3.93
   3  -5 -13   29.21    3.11
  -3   5 -14  393.59   15.86
   3  -5 -14  414.01   12.19
  -3   5 -15   60.40    6.23
   3  -5 -15   58.26    4.42
  -3   5 -16   40.97    5.37
   3  -5 -16   44.93    3.93
  -3   5 -17   43.25    5.53
   3  -5 -17   43.91    3.86
  -3   5 -18  354.99   15.96
   3  -5 -18  365.61   11.35
  -3   5 -19  305.27   14.46
   3  -5 -19  289.81    9.85
   3  -5 -20    3.27    1.31
  -3   5 -20    4.95    2.43
   3  -5 -21   49.46    3.62
   3  -5 -22    6.32    1.30
   3  -5 -23   87.86    4.22
  -3  -6 -24   61.66    4.11
  -3  -6 -23    3.92    1.52
  -3  -6 -22    1.28    1.16
  -3  -6 -21   62.60    5.94
  -3  -6 -20  111.22    8.26
  -3  -6 -19  133.17    9.47
  -3  -6 -18   47.17    6.03
  -3  -6 -17    2.43    1.78
  -3  -6 -16  178.99   11.78
  -3  -6 -15  110.08    9.30
   3   6 -15   95.73    6.65
  -3  -6 -14  155.81   10.87
  -3  -6 -14  127.19    7.08
   3   6 -14  143.83    7.95
  -3  -6 -13  176.23    8.21
   3   6 -13  182.59    8.81
  -3  -6 -13  184.19   11.61
   3   6 -12  433.65   13.62
  -3  -6 -12  401.19   12.88
   3   6 -11  115.42    6.64
  -3  -6 -11  124.59    6.57
   3   6 -10  148.79    7.37
  -3  -6 -10  149.95    7.08
  -3  -6  -9  203.63    8.16
   3  -6   6  317.83    8.33
   3  -6   5  192.40    6.66
   3  -6   4   58.20    3.71
   3  -6   3  442.24   11.22
   3  -6   2  112.19    5.43
   3  -6   1  388.23   10.79
   3  -6   0    4.56    1.28
   3  -6  -1  392.13   10.92
   3  -6  -2  112.61    5.64
   3  -6  -3  453.24   12.16
   3  -6  -4   59.45    4.24
   3  -6  -5  191.06    7.86
   3  -6  -6  342.16   11.00
   3  -6  -7  148.44    7.20
   3  -6  -8  126.79    6.83
   3  -6  -9  191.74    8.82
   3  -6 -10  142.82    7.68
   3  -6 -11  117.68    7.14
   3  -6 -12  417.29   11.92
   3  -6 -12  396.98   13.75
  -3   6 -13  168.80   10.39
   3  -6 -13  178.65    7.64
   3  -6 -14  141.02    6.90
  -3   6 -14  149.83    9.81
   3  -6 -15   98.92    5.79
  -3   6 -15  101.37    8.28
  -3   6 -16  185.10   11.44
   3  -6 -16  182.91    7.98
   3  -6 -17    3.61    1.33
  -3   6 -17    2.89    2.23
  -3   6 -18   42.41    5.61
   3  -6 -18   47.86    3.96
   3  -6 -19  132.58    6.43
   3  -6 -20  122.74    6.00
   3  -6 -21   63.57    4.10
   3  -6 -22    2.79    0.94
   3  -6 -23    2.73    0.98
  -3  -7 -24    1.53    0.85
  -3  -7 -23   45.24    3.87
  -3  -7 -22   29.13    3.53
  -3  -7 -21   39.65    4.55
  -3  -7 -20   87.01    7.15
  -3  -7 -19   34.29    4.85
  -3  -7 -18  169.36   11.10
  -3  -7 -17   55.63    6.51
  -3  -7 -16   49.83    6.38
  -3  -7 -15  155.63   11.22
   3   7 -14   90.22    6.38
  -3  -7 -14   78.43    7.96
   3   7 -13  238.74   10.31
  -3  -7 -12  197.79    8.96
   3   7 -12  198.27    9.14
   3   7 -11  518.74   15.08
  -3  -7 -11  501.43   14.89
   3   7 -10  114.57    6.61
  -3  -7 -10  112.61    6.44
  -3  -7  -9  238.36    9.29
   3  -7   5 1005.66   18.62
   3  -7   4 1079.99   20.20
   3  -7   3  133.45    6.20
   3  -7   2  388.85   11.24
   3  -7   1  268.98    9.19
   3  -7   0    9.64    1.91
   3  -7  -1  283.01    9.66
   3  -7  -2  379.64   11.48
   3  -7  -3  133.97    6.62
   3  -7  -4 1085.08   21.91
   3  -7  -5 1018.62   21.37
   3  -7  -6  674.02   16.97
   3  -7  -7  105.60    6.39
   3  -7  -8   51.97    4.62
   3  -7  -9  205.91    9.50
   3  -7 -10  116.72    7.34
   3  -7 -11  509.57   16.13
   3  -7 -11  535.08   13.46
   3  -7 -12  193.42    7.91
  -3   7 -12  163.04   10.09
   3  -7 -12  179.70    9.50
   3  -7 -13  242.25    9.03
  -3   7 -13  195.59   11.38
  -3   7 -14   67.05    6.99
   3  -7 -14   87.48    5.41
  -3   7 -15  129.45    9.78
   3  -7 -15  139.41    6.87
  -3   7 -16   49.60    6.19
   3  -7 -16   47.22    4.00
   3  -7 -17   55.54    4.32
   3  -7 -18  159.31    7.26
   3  -7 -19   36.92    3.38
   3  -7 -20   84.99    4.96
   3  -7 -21   43.13    3.37
   3  -7 -22   33.25    2.81
   3  -7 -23   47.66    3.10
  -3  -8 -23  152.06    6.68
  -3  -8 -22   22.35    3.00
  -3  -8 -21    4.08    1.64
  -3  -8 -20   63.01    5.90
  -3  -8 -19   31.39    4.66
  -3  -8 -18   27.15    4.57
  -3  -8 -17   46.12    6.11
  -3  -8 -16   81.12    8.10
  -3  -8 -15  236.70   14.05
  -3  -8 -14   30.18    5.10
   3   8 -13  113.74    7.20
  -3  -8 -12  168.12    8.74
   3   8 -12  160.25    8.36
  -3  -8 -11  158.02    8.25
   3   8 -11  158.56    8.15
   3   8 -10   24.19    3.09
  -3  -8 -10   28.26    3.48
   3   8  -9  553.73   15.51
  -3  -8  -9  594.17   16.06
  -3  -8  -8   48.72    4.23
  -3  -8  -7   11.01    2.13
   3  -8   5  569.15   13.49
   3  -8   4   77.65    4.86
   3  -8   3  775.82   17.37
   3  -8   2  610.08   15.25
   3  -8   1  246.66    9.28
   3  -8   0    9.43    1.91
   3  -8  -1  239.87    9.32
   3  -8  -2  611.68   15.91
   3  -8  -3  769.10   18.32
   3  -8  -4   82.30    5.57
   3  -8  -5  573.85   15.90
   3  -8  -6   62.93    5.08
   3  -8  -7   15.34    2.51
   3  -8  -8   43.22    4.36
   3  -8  -9  545.58   16.81
   3  -8 -10   26.05    3.75
   3  -8 -10   26.90    2.86
   3  -8 -11  157.10    9.10
   3  -8 -11  163.09    7.15
   3  -8 -12  156.75    9.22
   3  -8 -12  154.78    7.09
   3  -8 -13  109.68    6.03
   3  -8 -14   26.32    3.01
   3  -8 -15  233.66    9.03
   3  -8 -16   75.37    5.06
   3  -8 -17   43.19    3.79
   3  -8 -18   24.31    2.83
   3  -8 -19   30.09    3.07
   3  -8 -20   60.30    4.18
   3  -8 -21    8.27    1.56
   3  -8 -22   20.04    2.21
   3  -8 -23  147.04    5.39
  -3  -9 -23   24.53    2.45
  -3  -9 -22   26.99    3.11
  -3  -9 -21   21.90    3.09
  -3  -9 -20   18.47    3.28
  -3  -9 -19   56.08    5.84
  -3  -9 -18   65.19    6.77
  -3  -9 -17   47.68    6.14
  -3  -9 -16   21.96    4.43
  -3  -9 -15  104.61    9.38
  -3  -9 -14  128.85   10.48
   3   9 -13  260.67   11.13
  -3  -9 -12  254.16   11.39
   3   9 -12  244.82   10.57
  -3  -9 -11  236.08   10.67
   3   9 -11  222.71    9.89
   3   9 -10  116.50    6.88
  -3  -9 -10  122.16    7.40
   3   9  -9   20.82    2.85
  -3  -9  -9   27.45    3.54
  -3  -9  -8   83.44    5.82
  -3  -9  -7  680.55   17.43
  -3  -9  -6   38.25    3.78
   3  -9   4  166.99    7.53
   3  -9   3  158.30    7.56
   3  -9   2   87.90    5.69
   3  -9   1   29.59    3.47
   3  -9   0  516.13   14.95
   3  -9  -1   35.81    3.87
   3  -9  -2   88.40    5.94
   3  -9  -3  153.41    7.98
   3  -9  -4  154.37    8.08
   3  -9  -5  384.28   13.29
   3  -9  -6   33.90    3.93
   3  -9  -7  639.95   18.31
   3  -9  -8   75.17    6.07
   3  -9  -9   28.18    2.88
   3  -9  -9   22.81    3.52
   3  -9 -10  108.55    7.66
   3  -9 -10  115.83    5.90
   3  -9 -11  236.85   11.74
   3  -9 -11  232.68    8.77
   3  -9 -12  224.45   11.69
   3  -9 -12  259.56    9.38
   3  -9 -13  269.81    9.76
   3  -9 -13  247.38   12.36
   3  -9 -14  126.03    6.57
   3  -9 -15  108.85    6.11
   3  -9 -16   26.42    3.03
   3  -9 -17   45.53    3.92
   3  -9 -18   57.14    4.28
   3  -9 -19   52.00    3.98
   3  -9 -20   18.27    2.29
   3  -9 -21   20.14    2.23
   3  -9 -22   24.49    2.34
  -3 -10 -22    1.46    0.90
  -3 -10 -21   18.19    2.67
  -3 -10 -20   87.38    6.45
  -3 -10 -19  108.31    7.91
  -3 -10 -18    9.15    2.88
  -3 -10 -17   82.17    7.66
  -3 -10 -16   90.06    8.43
  -3 -10 -15   20.07    4.23
  -3  10  14  191.66    7.92
  -3 -10 -12   47.79    5.02
   3  10 -12   45.80    4.52
  -3 -10 -11   52.94    5.34
   3  10 -11   40.33    4.27
  -3 -10 -10  147.49    8.85
   3  10 -10  137.37    7.60
  -3 -10 -10  145.77    8.46
  -3 -10  -9  207.75   10.53
   3  10  -9  193.94    8.93
  -3 -10  -9  194.49    9.65
   3  10  -8   67.63    5.15
  -3 -10  -8   70.42    6.13
  -3 -10  -8   75.99    5.87
  -3 -10  -7   15.44    2.75
  -3 -10  -6  124.40    7.17
  -3 -10  -5   63.48    5.04
   3 -10   4  488.81   14.22
  -3 -10  -4  516.77   14.83
  -3 -10  -3   78.50    5.43
   3 -10   3   65.07    5.12
   3 -10   2   69.30    5.39
   3 -10   1   50.06    4.72
   3 -10   0  245.75   10.51
   3 -10  -1   51.98    4.86
   3 -10  -2   73.47    5.84
   3 -10  -3   70.00    5.65
   3 -10  -4  500.87   16.01
  -3 -10   5   73.11    4.59
   3 -10  -5   71.95    6.00
   3 -10  -6  123.18    7.90
   3 -10  -7   10.30    2.38
   3  10   7   14.53    2.44
   3  10   8   61.81    4.71
   3 -10  -8   64.92    5.99
   3 -10  -8   71.66    4.45
   3  10   9  192.02    8.50
   3 -10  -9  186.24   10.30
   3 -10  -9  192.13    7.62
   3  10  10  139.44    7.27
   3 -10 -10  134.06    8.95
   3 -10 -10  130.89    6.42
   3 -10 -11   44.53    5.42
   3 -10 -11   46.95    3.91
   3 -10 -12   37.91    5.02
   3 -10 -12   47.60    3.99
   3 -10 -13   48.10    4.10
   3 -10 -14  175.17    7.84
   3 -10 -15   15.68    2.43
   3 -10 -16   89.39    5.56
   3 -10 -17   79.03    5.16
   3 -10 -18    8.16    1.73
   3 -10 -19   94.19    5.27
   3 -10 -20   86.07    4.84
   3 -10 -21   17.60    2.10
   3 -10 -22    0.27    0.68
  -3 -11 -21   25.09    2.87
  -3 -11 -20    7.88    1.91
  -3 -11 -19    4.64    1.87
  -3 -11 -18    0.12    1.93
  -3 -11 -17   12.27    3.04
  -3 -11 -16    3.88    2.21
  -3  11  15   62.92    4.35
  -3 -11 -15   64.91    7.26
  -3  11  14   10.38    2.00
  -3  11  13   81.58    5.24
  -3 -11 -11  276.03   12.59
  -3 -11 -10    3.55    1.84
  -3 -11 -10    4.85    2.11
   3  11 -10    0.93    1.07
  -3 -11  -9  181.66   10.11
   3  11  -9  176.22    8.53
  -3 -11  -9  172.95    9.48
   3  11  -8    1.10    1.12
  -3 -11  -8    0.68    1.47
  -3 -11  -8    2.17    1.33
  -3 -11  -7   36.98    4.52
   3  11  -7   31.78    3.47
  -3 -11  -7   33.60    4.05
  -3 -11  -6  428.07   15.49
  -3 -11  -6  395.48   13.93
  -3 -11  -5  286.37   11.44
  -3 -11  -5  299.46   12.63
  -3 -11  -4    4.42    1.89
  -3 -11  -4    5.31    1.84
  -3 -11  -3   57.85    4.87
   3 -11   3   59.45    5.13
  -3 -11  -2   94.76    6.23
   3 -11   2   96.43    6.69
  -3 -11  -1  173.44    8.26
   3 -11   1  167.04    8.94
   3 -11   0   46.72    4.81
  -3 -11   0   53.65    4.70
   3 -11  -1  166.21    9.08
  -3 -11   1  172.32    8.13
  -3 -11   2   87.53    5.63
   3 -11  -2   86.39    6.54
  -3 -11   3   58.00    4.49
   3 -11  -3   53.67    5.33
   3  11   4    1.94    1.27
  -3 -11   4    4.39    1.44
   3 -11  -4    3.69    1.60
   3  11   5  260.14    9.76
   3 -11  -5  269.46   12.29
   3  11   6  373.19   12.00
   3 -11  -6  391.33   15.06
   3  11   7   33.03    3.56
   3 -11  -7   29.75    4.31
   3 -11  -7   34.73    3.15
   3 -11  -8    1.41    0.78
   3  11   8    0.72    1.07
   3 -11  -8    0.73    1.93
   3  11   9  168.16    8.19
   3 -11  -9  163.85   10.17
   3 -11  -9  179.25    7.47
   3 -11 -10    3.68    1.39
   3  11  10    3.85    1.77
   3 -11 -10    4.44    2.46
   3  11  11  276.91   10.62
   3 -11 -11  261.26   13.22
   3 -11 -11  277.09    9.89
   3 -11 -12  170.93    7.74
   3 -11 -13   77.53    5.28
   3 -11 -14    6.69    1.72
   3 -11 -15   59.62    4.60
   3 -11 -16    4.41    1.53
   3 -11 -17   13.47    2.18
   3 -11 -18    3.38    1.34
   3 -11 -19    1.14    0.95
   3 -11 -20    4.75    1.31
   3 -11 -21   22.15    2.30
  -3 -12 -21   34.80    2.94
  -3 -12 -20   27.00    3.06
  -3 -12 -19   37.78    4.09
  -3 -12 -18    9.40    2.41
  -3 -12 -17   75.10    6.82
  -3 -12 -16   24.65    4.38
  -3  12  15   64.90    4.34
  -3 -12 -15   59.06    6.93
  -3  12  14   20.08    2.64
  -3  12  13   27.80    3.10
  -3  12  12   32.59    3.31
  -3 -12 -10   23.00    3.83
   3  12  -9   77.66    5.69
  -3 -12  -9   93.36    7.28
  -3 -12  -9   86.92    7.13
  -3 -12  -8  659.07   20.18
  -3 -12  -8  629.60   19.16
  -3 -12  -7   86.81    7.04
  -3 -12  -7   85.49    6.69
  -3 -12  -6   94.83    7.35
  -3 -12  -6   94.99    6.89
  -3 -12  -5   64.89    6.05
  -3 -12  -5   62.50    5.50
  -3 -12  -4   94.28    7.27
  -3 -12  -4   94.88    6.73
  -3 -12  -3  282.67   12.60
  -3 -12  -3  303.80   12.03
  -3 -12  -2   29.22    4.07
   3 -12   2   25.59    3.64
  -3 -12  -2   28.87    3.76
  -3 -12  -1  316.92   13.47
   3  12  -1  324.65   11.23
   3 -12   1  340.63   13.63
  -3 -12  -1  343.63   12.60
  -3 -12   0  526.46   15.82
   3  12   0  500.11   14.40
   3 -12   0  551.25   17.84
   3  12   1  325.82   11.25
   3 -12  -1  326.35   13.69
  -3 -12   1  339.05   12.25
   3 -12  -2   22.26    3.44
   3  12   2   24.44    3.18
  -3 -12   2   29.04    3.55
   3  12   3  289.09   10.60
  -3 -12   3  313.76   11.37
   3 -12  -3  304.06   13.31
   3  12   4   89.71    5.79
   3 -12  -4   89.95    7.28
   3  12   5   59.80    4.78
   3 -12  -5   62.42    6.14
   3  12   6   89.42    5.86
   3 -12  -6   88.49    7.34
   3  12   7   82.70    5.74
   3 -12  -7   87.57    7.55
   3  12   8  598.21   16.49
   3 -12  -8  587.56   20.42
   3  12   9   88.85    6.01
   3 -12  -9   88.97    5.44
   3 -12  -9   81.68    7.49
   3  12  10   19.29    2.85
   3 -12 -10   20.34    2.67
   3  12  11  233.13    9.80
   3 -12 -11  242.52    9.47
   3 -12 -12   28.22    3.28
   3 -12 -13   26.27    3.17
   3 -12 -14   18.36    2.65
   3 -12 -15   56.41    4.48
   3 -12 -16   23.97    2.95
   3 -12 -17   65.08    4.59
   3 -12 -18   13.18    2.04
   3 -12 -19   36.43    3.16
   3 -12 -20   22.53    2.37
  -3 -13 -20    9.92    1.73
  -3 -13 -19    0.41    0.97
  -3 -13 -18   15.49    2.70
  -3 -13 -17   12.45    2.75
  -3 -13 -16   55.01    5.98
  -3 -13 -15    1.74    1.64
  -3  13  15    3.89    1.18
  -3  13  14    9.77    1.91
  -3  13  13   68.63    4.71
  -3  13  12  182.37    7.86
  -3  13  11  200.38    8.27
  -3 -13 -10  189.08   10.35
  -3  13  10  173.61    7.71
  -3  13   9  208.36    8.49
  -3 -13  -9  236.01   11.82
  -3 -13  -8  685.97   21.18
  -3 -13  -7   66.70    6.30
  -3 -13  -7   66.33    6.42
  -3 -13  -6   33.40    4.36
  -3 -13  -6   32.88    4.56
  -3 -13  -5   28.01    4.24
  -3 -13  -5   21.73    3.30
  -3 -13  -4   35.34    4.71
  -3 -13  -4   36.14    4.38
  -3 -13  -3   89.07    7.25
  -3 -13  -3   92.41    6.93
  -3 -13  -2  136.03    8.79
   3 -13   2  129.10    8.32
  -3 -13  -2  143.32    8.47
  -3 -13  -1   80.88    6.85
  -3 -13  -1   78.13    6.23
   3 -13   1   79.13    6.78
  -3 -13   0  223.72   11.46
   3  13   0  216.82    9.35
  -3  13   0  199.54    7.72
   3 -13   0  226.14   11.60
  -3 -13   0  234.13   10.65
   3 -13  -1   80.64    7.03
  -3 -13   1   79.33    6.83
   3  13   1   84.01    5.80
  -3  13  -1   80.22    4.74
  -3 -13   1   87.87    6.39
   3  13   2  136.97    7.37
  -3 -13   2  142.78    8.03
   3 -13  -2  130.50    8.99
  -3 -13   3   85.27    5.99
   3  13   3   87.24    5.91
   3 -13  -3   89.79    7.56
   3  13   4   33.30    3.67
   3 -13  -4   30.40    4.43
  -3 -13   5   25.40    4.06
   3  13   5   23.07    3.11
   3 -13  -5   23.87    4.26
  -3 -13   6   27.36    4.20
   3  13   6   31.87    3.64
   3 -13  -6   22.89    4.01
  -3 -13   7   49.89    5.88
   3  13   7   58.53    4.96
   3 -13  -7   59.41    6.35
   3  13   8  620.76   17.10
   3 -13  -8  696.21   16.59
   3  13   9  206.25    9.32
   3 -13  -9  229.58    9.18
   3 -13 -10  179.37    8.25
   3  13  10  168.03    8.42
   3 -13 -11  197.66    8.72
   3 -13 -12  189.63    8.57
   3 -13 -13   72.93    5.25
   3 -13 -14    8.82    1.99
   3 -13 -15    4.03    1.47
   3 -13 -16   52.45    4.24
   3 -13 -17   14.48    2.25
   3 -13 -18   14.61    2.14
   3 -13 -19    0.32    0.71
  -3 -14 -19   17.30    2.19
  -3 -14 -18   12.62    2.28
  -3 -14 -17   38.80    4.28
  -3 -14 -16   33.26    4.33
  -3  14  15   36.08    3.09
  -3 -14 -15   28.44    4.38
  -3 -14 -14    5.62    2.57
  -3  14  14    6.71    1.52
  -3  14  13    1.89    1.21
  -3  14  12   74.50    4.92
  -3  14  11   29.41    3.16
  -3 -14 -11   29.05    4.08
  -3 -14 -10  140.86    8.79
  -3  14  10  136.18    6.78
  -3 -14  -9   71.03    6.45
  -3  14   9   67.70    4.77
  -3 -14  -8  310.46   13.85
  -3  14   8  278.98    9.90
  -3 -14  -7  235.59   12.06
  -3  14   7  211.54    8.54
  -3 -14  -6   29.54    4.44
  -3  14   6   27.46    3.21
  -3  14   5  270.18    9.68
  -3 -14  -5  289.92   13.40
  -3  14   4  131.07    6.56
  -3 -14  -4  135.36    9.13
  -3 -14  -3   29.76    4.41
  -3 -14  -3   26.92    4.09
  -3  14   3   25.82    3.00
  -3  14   2  562.40   14.36
  -3 -14  -2  616.74   19.12
  -3 -14  -2  564.18   19.30
   3 -14   1   74.86    6.75
  -3 -14  -1   94.30    7.09
  -3  14   1   83.02    5.14
  -3 -14  -1   95.54    7.81
  -3 -14   0    9.02    2.75
  -3  14   0    5.71    1.60
  -3 -14   0    8.70    2.48
   3 -14   0    9.20    2.64
  -3 -14   1  100.29    7.18
  -3 -14   1   85.83    7.45
   3  14   1   88.29    6.06
  -3  14  -1   80.72    4.92
   3 -14  -1   87.57    7.67
  -3 -14   2  531.85   18.67
   3  14   2  559.58   16.06
  -3  14  -2  547.74   13.47
   3 -14  -2  560.74   19.77
  -3 -14   3   31.87    4.52
   3  14   3   22.55    3.20
   3 -14  -3   24.33    3.98
  -3 -14   4  113.67    8.49
   3  14   4  120.95    7.11
  -3 -14   5  239.81   12.34
   3  14   5  274.73   10.81
  -3 -14   6   27.16    4.29
   3  14   6   29.47    3.56
  -3 -14   7  171.04   10.66
   3  14   7  210.58    9.41
   3  14   8  286.34   11.07
   3  14   9   68.18    5.31
   3 -14  -9   85.09    5.77
   3  14  10  133.68    7.41
   3 -14 -10  154.52    7.81
   3 -14 -11   31.63    3.61
   3 -14 -12   84.62    5.81
   3 -14 -13    0.30    1.12
   3 -14 -14    8.48    1.94
   3 -14 -15   30.81    3.36
   3 -14 -16   30.43    3.24
   3 -14 -17   36.92    3.28
  -3 -15 -18    2.78    1.14
  -3 -15 -17   36.92    3.64
  -3 -15 -16    7.66    2.03
  -3 -15 -15   61.42    5.85
  -3  15  15   63.47    3.90
  -3  15  14   52.75    3.78
  -3 -15 -14   47.23    5.48
  -3  15  13   32.22    3.13
  -3  15  12   13.82    2.21
  -3  15  11    4.87    1.32
  -3  15  10   74.32    4.88
  -3 -15 -10   71.33    6.04
  -3  15   9  171.97    7.59
  -3 -15  -9  181.16   10.00
  -3 -15  -8   30.77    4.40
  -3  15   8   24.81    3.00
  -3 -15  -7    3.90    2.01
  -3  15   7    4.86    1.51
  -3 -15  -6  128.92    8.93
  -3  15   6  111.19    6.12
  -3 -15  -5   60.94    6.42
  -3  15   5   59.83    4.57
  -3  15   4   81.81    5.22
  -3 -15  -4   80.16    7.32
  -3 -15  -3    1.06    1.56
  -3  15   3    1.97    1.33
  -3 -15  -2  344.56   14.99
  -3  15   2  346.37   11.03
  -3 -15  -1  594.04   19.97
  -3  15   1  588.14   14.77
  -3 -15   0   19.51    4.04
  -3  15   0   12.02    2.37
  -3  15  -1  559.36   14.03
  -3 -15   1  552.10   19.41
  -3 -15   2  332.44   14.70
   3  15   2  341.01   12.33
  -3 -15   3    2.45    1.89
   3  15   3    1.51    1.44
  -3 -15   4   71.83    6.88
   3  15   4   80.32    5.84
  -3 -15   5   54.62    5.85
   3  15   5   57.23    4.95
  -3 -15   6   99.03    7.84
   3  15   6  115.16    6.93
  -3 -15   7    9.56    2.83
   3  15   7    6.13    2.05
   3  15   8   27.09    3.40
   3 -15 -10   89.41    6.01
   3 -15 -11    3.23    1.39
   3 -15 -12   13.57    2.48
   3 -15 -13   33.40    3.69
   3 -15 -14   53.16    4.35
   3 -15 -15   60.26    4.37
  -3 -16 -17   23.72    2.45
  -3 -16 -16   33.49    3.42
  -3 -16 -15   17.86    2.86
  -3  16  15   14.84    1.78
  -3  16  14   22.37    2.39
  -3 -16 -14   18.97    3.35
  -3  16  13   41.77    3.30
  -3  16  12  131.04    6.12
  -3  16  11    6.26    1.54
  -3  16  10   78.43    4.97
  -3 -16 -10   78.44    5.96
  -3 -16  -9   26.23    3.64
  -3  16   9   22.62    2.76
  -3 -16  -8   59.84    5.80
  -3  16   8   62.35    4.53
  -3 -16  -7  147.41    9.26
  -3  16   7  143.93    6.93
  -3 -16  -6   14.76    3.11
  -3  16   6   16.62    2.58
  -3  16   5  134.62    6.77
  -3 -16  -5  136.88    9.23
  -3 -16  -4  219.05   11.82
  -3  16   4  215.57    8.69
  -3 -16  -3   75.97    6.92
  -3  16   3   71.62    4.89
  -3  16   2  154.80    7.19
  -3 -16  -2  141.69    9.68
  -3 -16  -1    5.19    2.70
  -3  16   1    7.83    1.80
  -3 -16   0   82.63    7.44
  -3  16   0   80.13    5.10
  -3 -16   1    6.36    2.62
  -3  16  -1    8.38    1.75
  -3 -16   2  142.10    9.54
  -3 -16   3   61.35    6.37
  -3 -16   4  179.55   10.62
  -3 -16   5  106.77    8.27
  -3 -16   6   16.75    3.40
  -3 -16   7  119.68    8.51
  -3 -16   8   47.33    5.29
  -3 -17 -15   31.36    3.16
  -3  17  14   24.99    2.27
  -3 -17 -14   21.80    3.07
  -3  17  13   57.70    3.59
  -3 -17 -13   43.76    4.78
  -3  17  12   40.86    3.20
  -3  17  11   18.78    2.32
  -3  17  10   45.00    3.59
  -3 -17 -10   46.77    4.30
  -3 -17  -9   70.86    5.53
  -3  17   9   73.75    4.70
  -3 -17  -8    2.94    1.59
  -3  17   8    2.26    1.10
  -3 -17  -7    4.67    1.94
  -3  17   7    5.28    1.49
  -3 -17  -6   37.71    4.56
  -3  17   6   37.44    3.48
  -3  17   5   31.51    3.31
  -3 -17  -5   37.52    4.74
  -3 -17  -4   79.87    6.92
  -3  17   4   78.61    5.13
  -3 -17  -3   25.34    4.11
  -3  17   3   19.26    2.62
  -3 -17  -2   42.83    5.12
  -3  17   2   43.98    3.92
  -3  17   1   62.50    4.45
  -3 -17  -1   63.01    6.40
  -3 -17   0   84.12    7.19
  -3  17   0   77.72    4.95
  -3 -17   1   66.32    6.64
  -3  17  -1   66.96    4.46
  -3 -17   2   43.38    5.33
  -3 -17   3   21.09    3.84
  -3 -17   4   64.68    6.24
  -3 -17   5   30.72    4.35
  -3 -17   6   34.84    4.49
  -3 -17   7    6.65    2.26
  -3  18  13   27.25    2.23
  -3 -18 -13   17.87    2.64
  -3  18  12   38.98    2.85
  -3 -18 -12   21.88    3.08
  -3  18  11   55.91    3.59
  -3 -18 -10    7.53    1.70
  -3  18  10    9.48    1.64
  -3 -18  -9    8.87    1.81
  -3  18   9   11.31    1.80
  -3  18   8   50.35    3.75
  -3 -18  -8   43.48    4.20
  -3  18   7  131.41    6.18
  -3 -18  -7  134.46    7.73
  -3 -18  -6    2.74    1.54
  -3  18   6    2.98    1.37
  -3 -18  -5    5.49    1.94
  -3  18   5    7.64    1.72
  -3 -18  -4   15.15    3.01
  -3  18   4   12.95    2.14
  -3 -18  -3   76.16    6.56
  -3  18   3   70.22    4.66
  -3  18   2   83.51    5.04
  -3 -18  -2   84.62    7.02
  -3 -18  -1   71.39    6.38
  -3  18   1   57.27    4.16
  -3  18   0  142.47    6.49
  -3 -18   0  146.64    9.21
  -3 -18   1   62.31    6.07
  -3  18  -1   57.87    4.02
  -3 -18   2   79.13    6.62
  -3 -18   3   59.27    5.66
  -3 -18   4   12.84    2.69
  -3 -18   5    4.24    1.55
  -3 -18   6    2.73    1.41
  -3 -18   7  110.23    6.92
  -3 -19 -11    1.60    1.14
  -3  19  11    6.96    1.32
  -3  19  10    4.16    1.19
  -3  19   9   92.92    4.58
  -3 -19  -9   84.56    4.79
  -3  19   8    4.53    1.33
  -3 -19  -8    2.95    1.17
  -3 -19  -7   25.54    3.03
  -3  19   7   31.35    2.84
  -3 -19  -6   12.15    2.34
  -3  19   6   14.77    2.11
  -3 -19  -5   31.66    3.72
  -3  19   5   37.11    3.18
  -3  19   4  120.22    5.79
  -3 -19  -4  113.31    7.20
  -3 -19  -3   66.93    5.74
  -3  19   3   68.38    4.40
  -3  19   2   98.60    5.19
  -3 -19  -2  105.66    7.22
  -3 -19  -1   82.18    6.40
  -3  19   1   76.16    4.53
  -3 -19   0    2.63    1.71
  -3  19   0    4.99    1.41
  -3 -19   1   79.38    6.20
  -3 -19   2   90.50    6.55
  -3 -19   3   57.45    5.14
  -3 -19   4   95.71    6.47
  -3 -19   5   29.06    3.47
  -3 -19   6    9.97    2.02
  -3 -19   7   21.56    2.64
  -3  20   9   39.06    2.62
  -3  20   8    9.76    1.48
  -3 -20  -7    3.48    1.14
  -3  20   7    2.67    0.89
  -3 -20  -6    8.80    1.77
  -3  20   6   11.41    1.68
  -3  20   5   37.54    2.93
  -3 -20  -5   33.97    3.38
  -3  20   4   67.10    3.95
  -3 -20  -4   67.16    4.92
  -3 -20  -3   10.66    2.15
  -3  20   3    9.33    1.63
  -3  20   2    6.05    1.37
  -3 -20  -2    5.74    1.73
  -3 -20  -1   21.43    3.05
  -3  20   1   17.82    2.01
  -3 -20   0    4.90    1.65
  -3 -20   1   16.57    2.60
  -3 -20   2    5.70    1.70
  -3 -20   3    8.68    1.96
  -3 -20   4   54.30    4.24
   3 -20  -4   60.46    4.40
  -3 -20   5   27.37    2.88
   3 -20  -5   30.45    2.96
  -3 -20   6    8.22    1.55
  -3 -21  -5   22.83    2.35
  -3 -21  -4    3.97    1.22
  -3 -21  -3  125.19    5.86
  -3 -21  -2    2.09    1.03
  -3 -21  -1    5.09    1.38
  -3 -21   0    1.89    0.98
  -3 -21   1    3.81    1.08
   3 -21  -1    3.75    1.34
  -3 -21   2    0.97    0.71
   3 -21  -2    2.23    1.10
  -3 -21   3  105.97    5.08
   4   0   0  136.87    5.28
   4   0  -1  427.17   10.10
   4   0   1  407.12    9.81
   4   0   2  824.36   15.31
   4   0  -2  825.23   15.50
   4   0   3  810.04   15.05
   4   0  -3  773.94   15.00
   4   0  -4 3082.54   41.93
   4   0   4 3178.10   41.78
   4   0  -5  924.05   17.15
   4   0  -6    6.69    1.19
   4   0  -7  141.37    5.91
   4   0  -8  127.12    5.65
   4   0  -9  256.22    8.33
   4   0 -10    4.10    1.14
   4   0 -11  587.18   14.48
   4   0 -12  101.47    5.67
   4   0 -13    1.62    0.80
   4   0 -13    3.23    1.08
  -4   0 -13    0.65    1.39
   4   0 -14   41.17    3.80
  -4   0 -14   33.35    4.55
   4   0 -14   36.90    3.60
   4   0 -15  222.46    9.19
  -4   0 -15  210.10   11.40
   4   0 -15  202.75    8.93
   4   0 -16  122.37    6.71
  -4   0 -16  116.09    8.56
   4   0 -17   44.31    3.99
  -4   0 -17   33.52    4.83
  -4   0 -18  378.73   15.61
   4   0 -18  372.51   11.72
  -4   0 -19    0.35    1.44
   4   0 -19    0.66    0.99
  -4   0 -20   10.84    2.88
   4   0 -20   11.24    1.83
  -4   0 -21   52.78    5.30
   4   0 -21   52.19    3.43
  -4   0 -22    2.39    1.65
  -4   0 -23   44.24    4.22
  -4   0 -24   21.36    2.68
  -4  -1 -24    0.24    0.98
  -4  -1 -23   30.24    3.55
  -4  -1 -22   22.19    3.32
  -4  -1 -21   51.08    5.24
  -4  -1 -20   52.39    5.57
   4   1 -20   53.33    3.69
  -4  -1 -19   32.58    4.52
   4   1 -19   33.44    3.19
  -4  -1 -18   10.39    2.93
   4   1 -18   11.50    2.07
   4   1 -17   69.37    4.99
  -4  -1 -17   53.45    5.88
   4   1 -16  145.83    7.31
  -4  -1 -16  142.31    9.54
   4   1 -16  138.86    7.71
   4   1 -15   52.19    4.31
  -4  -1 -15   56.48    6.11
   4   1 -15   50.00    4.55
   4   1 -14   48.25    4.19
  -4  -1 -14   51.03    5.61
   4   1 -14   48.81    4.26
  -4  -1 -13   73.46    6.54
   4   1 -13   76.33    5.21
   4   1 -12  125.91    6.54
   4   1 -11  487.94   13.44
   4   1  -9  117.49    5.30
   4   1  -8  226.76    7.43
   4   1  -7   60.94    3.75
   4   1  -6  233.16    7.41
   4   1  -5   94.44    4.55
   4  -1   5   95.40    4.54
   4   1  -4  320.11    8.68
   4  -1   4  334.17    8.87
   4  -1   3  904.72   16.37
   4   1  -3  884.50   16.21
   4  -1   2   39.67    2.87
   4   1  -2   41.53    2.91
   4  -1   1  749.48   14.49
   4   1  -1  749.51   14.39
   4  -1   0  815.20   15.44
   4   1   0  825.23   15.21
   4  -1  -1  763.62   14.82
   4   1   1  752.84   14.39
   4  -1  -2   43.42    3.09
   4   1   2   41.56    2.81
   4  -1  -3  934.63   17.17
   4  -1  -4  314.41    8.90
   4  -1  -5   96.58    4.85
   4  -1  -6  228.80    7.73
   4  -1  -7   60.00    3.95
   4  -1  -8  231.98    8.09
   4  -1  -9  110.10    5.64
   4  -1 -10  114.20    5.51
   4  -1 -10  117.87    5.81
   4  -1 -11  490.77   12.49
   4  -1 -12  135.29    6.30
   4  -1 -13   78.20    5.16
  -4   1 -13   75.97    6.55
   4  -1 -13   84.53    5.09
   4  -1 -14   54.84    4.45
  -4   1 -14   51.56    5.45
   4  -1 -15   52.74    4.45
  -4   1 -15   47.75    5.45
   4  -1 -16  144.15    7.29
  -4   1 -16  145.25    9.48
   4  -1 -17   69.26    5.02
  -4   1 -17   61.82    6.37
  -4   1 -18   10.34    2.97
   4  -1 -18   12.64    2.22
  -4   1 -19   32.02    4.42
   4  -1 -19   38.34    3.51
  -4   1 -20   45.64    5.26
   4  -1 -20   52.75    3.86
  -4   1 -21   51.26    5.20
   4  -1 -21   53.79    3.57
  -4   1 -22   28.43    3.68
   4  -1 -22   28.13    2.32
  -4   1 -23   35.80    3.98
  -4  -2 -24    6.38    1.56
  -4  -2 -23   10.50    2.10
  -4  -2 -22   56.71    5.01
  -4  -2 -21  114.71    7.64
  -4  -2 -20  128.59    8.51
  -4  -2 -19   69.70    6.54
   4   2 -18  100.28    5.70
  -4  -2 -18   91.05    7.68
  -4  -2 -17   18.01    3.55
   4   2 -17   22.09    2.85
  -4  -2 -16    9.63    2.83
   4   2 -16   10.28    1.98
   4   2 -15   44.20    3.94
   4   2 -15   46.21    4.41
  -4  -2 -15   42.83    5.39
   4   2 -14   57.69    4.49
  -4  -2 -14   55.22    5.95
   4   2 -14   54.38    4.67
   4   2 -13   40.12    3.78
  -4  -2 -13   38.53    4.87
   4   2 -12   14.90    2.32
   4   2 -11   55.66    4.40
   4   2  -9  156.93    5.94
   4   2  -8  225.45    7.35
   4   2  -7   71.18    3.99
   4   2  -6   12.24    1.71
   4  -2   6   10.06    1.46
   4   2  -5  877.39   16.39
   4  -2   5  898.60   16.47
   4   2  -4  329.37    8.93
   4  -2   4  326.15    8.86
   4  -2   3 1353.36   22.01
   4   2  -3 1319.60   21.48
   4  -2   2   93.94    4.53
   4   2  -2   93.27    4.37
   4  -2   1   27.05    2.41
   4   2  -1   26.45    2.30
   4  -2   0  662.03   13.84
   4   2   0  706.94   13.71
   4  -2  -1   27.52    2.54
   4  -2  -2   93.15    4.65
   4  -2  -3 1363.90   22.87
   4  -2  -4  334.07    9.64
   4  -2  -5  862.74   17.29
   4  -2  -6   13.36    2.02
   4  -2  -7   70.40    4.41
   4  -2  -8  214.76    8.13
   4  -2  -9  153.27    5.99
   4  -2  -9  149.76    6.77
   4  -2 -10  236.42    7.70
   4  -2 -10  246.02    8.93
   4  -2 -11   60.00    3.83
   4  -2 -11   56.62    4.27
   4  -2 -13   39.28    3.64
  -4   2 -13   43.81    4.98
   4  -2 -14   64.02    4.80
  -4   2 -14   61.81    5.93
   4  -2 -15   41.75    3.96
  -4   2 -15   39.36    4.99
  -4   2 -16   12.98    3.09
   4  -2 -16   11.80    2.21
  -4   2 -17   21.87    3.98
   4  -2 -17   24.71    2.97
  -4   2 -18   88.23    7.38
   4  -2 -18   95.61    5.74
  -4   2 -19   77.65    6.91
   4  -2 -19   74.85    4.89
  -4   2 -20  127.98    8.60
   4  -2 -20  138.71    6.34
  -4   2 -21  104.05    7.40
   4  -2 -21  105.55    5.09
  -4   2 -22   54.71    5.03
   4  -2 -22   53.28    3.26
  -4   2 -23   16.83    2.68
  -4  -3 -24   14.32    2.14
  -4  -3 -23   47.13    4.05
  -4  -3 -22    7.95    2.08
  -4  -3 -21   40.58    4.57
  -4  -3 -20   29.46    4.27
  -4  -3 -19  105.10    8.04
  -4  -3 -18   21.61    4.04
   4   3 -17  121.46    6.39
  -4  -3 -17  117.28    8.85
   4   3 -16  212.40    8.75
  -4  -3 -16  197.26   11.54
   4   3 -15  122.07    6.58
  -4  -3 -15  113.66    8.74
   4   3 -15  110.16    6.98
  -4  -3 -14   75.24    7.11
   4   3 -14   73.66    5.56
   4   3 -13   81.85    5.72
  -4  -3 -13   81.17    7.20
   4   3 -12   99.86    6.22
   4   3 -11  221.38    9.31
   4  -3   6   96.06    4.58
   4  -3   5  205.13    6.91
   4  -3   4  381.29    9.94
   4  -3   3 1178.52   20.47
   4  -3   2  331.21    9.38
   4  -3   1  653.28   13.98
   4  -3   0  779.33   15.72
   4  -3  -1  651.50   14.19
   4  -3  -2  336.35    9.72
   4  -3  -3 1220.22   21.77
   4  -3  -4  395.86   10.93
   4  -3  -5  211.81    7.88
   4  -3  -6   92.00    5.21
   4  -3  -7  138.67    6.55
   4  -3  -8  429.08   12.42
   4  -3  -9   87.79    4.18
   4  -3  -9   91.59    5.65
   4  -3 -10   58.98    4.60
   4  -3 -11  227.98    9.06
   4  -3 -12  100.00    5.74
   4  -3 -13   83.24    5.37
  -4   3 -13   83.28    6.79
   4  -3 -14   79.30    5.36
  -4   3 -14   77.24    6.65
   4  -3 -15  116.02    6.52
  -4   3 -15  125.87    8.80
  -4   3 -16  199.11   11.02
   4  -3 -16  211.13    8.86
  -4   3 -17  113.52    8.38
   4  -3 -17  119.37    6.53
   4  -3 -18   24.92    2.93
  -4   3 -18   23.13    3.96
  -4   3 -19  120.51    8.56
   4  -3 -19  117.07    6.14
  -4   3 -20   27.28    4.08
   4  -3 -20   29.21    2.91
  -4   3 -21   37.61    4.44
   4  -3 -21   41.02    3.18
   4  -3 -22    8.14    1.36
  -4   3 -22    6.97    2.05
   4  -3 -23   48.96    2.86
  -4  -4 -24    0.92    0.89
  -4  -4 -23   24.86    2.97
  -4  -4 -22   36.19    3.94
  -4  -4 -21   97.12    6.93
  -4  -4 -20   56.55    5.71
  -4  -4 -19    3.01    1.88
  -4  -4 -18   82.78    7.42
  -4  -4 -17   18.84    3.74
  -4  -4 -16   48.46    5.84
  -4  -4 -15  124.25    9.30
   4   4 -15  127.02    6.70
   4   4 -15  119.21    7.42
  -4  -4 -14   19.41    3.81
   4   4 -14   20.97    2.98
   4   4 -13   57.73    5.00
  -4  -4 -13   65.12    6.60
  -4  -4 -12  545.98   19.38
   4   4 -12  538.80   15.71
   4   4 -11   49.92    4.42
   4  -4   7  116.92    4.86
   4  -4   6  621.48   13.16
   4  -4   5  355.82    9.68
   4  -4   4  636.10   14.05
   4  -4   3  114.70    5.56
   4  -4   2  412.61   11.14
   4  -4   1  402.37   10.91
   4  -4   0 1063.72   20.02
   4  -4  -1  395.46   10.99
   4  -4  -2  429.11   11.62
   4  -4  -3  119.36    5.86
   4  -4  -4  642.31   15.19
   4  -4  -5  368.69   11.23
   4  -4  -6  652.86   15.80
   4  -4  -7  126.02    6.58
   4  -4  -8   21.28    2.88
   4  -4  -9  179.53    8.32
   4  -4 -10   13.15    2.38
   4  -4 -11   52.08    4.64
   4  -4 -12  559.28   14.80
  -4   4 -12  579.46   18.40
   4  -4 -13   58.93    4.53
  -4   4 -13   70.57    6.36
   4  -4 -14   20.41    2.71
  -4   4 -14   24.23    3.96
   4  -4 -15  124.76    6.76
  -4   4 -15  121.17    8.64
  -4   4 -16   45.32    5.63
   4  -4 -16   49.56    4.19
  -4   4 -17   20.84    3.76
   4  -4 -17   21.39    2.79
  -4   4 -18   88.49    7.43
   4  -4 -18   88.11    5.41
  -4   4 -19    3.82    2.10
   4  -4 -19    3.06    1.21
  -4   4 -20   50.55    5.38
   4  -4 -20   53.86    3.90
  -4   4 -21  107.86    7.33
   4  -4 -21  114.31    5.34
   4  -4 -22   33.22    2.64
   4  -4 -23   25.02    2.08
  -4  -5 -24   67.92    3.96
  -4  -5 -23    4.83    1.31
  -4  -5 -22   56.62    4.74
  -4  -5 -21   36.80    4.34
  -4  -5 -20   78.49    6.59
  -4  -5 -19   55.24    5.98
  -4  -5 -18   93.50    7.91
  -4  -5 -17   14.91    3.27
  -4  -5 -16   45.11    5.67
  -4  -5 -15   42.82    5.64
  -4  -5 -14  237.96   13.00
   4   5 -14  227.11   10.31
   4   5 -13  152.52    8.28
  -4  -5 -13  139.48    9.87
   4   5 -12   25.58    3.31
  -4  -5 -12   23.45    4.02
  -4   5  12   32.30    3.57
   4   5 -11   30.69    3.53
  -4  -5 -11   32.86    3.39
   4  -5   6  279.72    8.41
   4  -5   5  285.52    8.82
   4  -5   4  677.92   15.02
   4  -5   3 1364.17   23.98
   4  -5   2    4.55    1.36
   4  -5   1 1057.85   20.45
   4  -5   0  124.49    6.09
   4  -5  -1 1065.20   20.89
   4  -5  -2    5.18    1.54
   4  -5  -3 1429.41   25.82
   4  -5  -4  656.08   15.94
   4  -5  -5  305.01   10.47
   4  -5  -6  285.61   10.38
   4  -5  -7  726.57   17.88
   4  -5  -8   56.00    4.73
   4  -5  -9  258.73   10.51
   4  -5 -10  193.79    9.17
   4  -5 -11   25.78    2.95
   4  -5 -11   28.79    3.64
   4  -5 -12   32.94    3.37
  -4   5 -12   29.95    4.27
   4  -5 -12   32.73    3.96
  -4   5 -13  142.39    9.29
   4  -5 -13  148.44    7.29
  -4   5 -14  229.65   11.90
   4  -5 -14  242.48    9.46
  -4   5 -15   41.17    5.23
   4  -5 -15   39.53    3.80
  -4   5 -16   52.72    5.87
   4  -5 -16   46.60    4.10
   4  -5 -17   16.72    2.50
  -4   5 -17   16.40    3.51
  -4   5 -18  106.14    8.33
   4  -5 -18   97.82    5.73
  -4   5 -19   60.90    6.32
   4  -5 -19   60.38    4.32
   4  -5 -20   83.51    4.81
   4  -5 -21   39.80    3.11
   4  -5 -22   60.99    3.58
   4  -5 -23    7.78    1.22
  -4  -6 -23   46.61    3.69
  -4  -6 -22   69.63    5.11
  -4  -6 -21   46.04    4.60
  -4  -6 -20   43.32    4.91
  -4  -6 -19   -0.60    1.94
  -4  -6 -18    2.58    1.81
  -4  -6 -17   43.19    5.61
  -4  -6 -16  432.09   18.00
  -4  -6 -15  185.57   11.84
  -4  -6 -14   46.34    5.95
   4   6 -14   45.34    4.62
   4   6 -13  185.50    9.37
  -4  -6 -13  192.85   11.84
   4   6 -12  130.58    7.67
  -4  -6 -12  128.97    9.51
   4   6 -11   48.71    4.59
  -4  -6 -11   58.34    4.78
   4  -6   6  502.72   12.04
   4  -6   5   77.36    4.57
   4  -6   4  238.02    8.52
   4  -6   3  249.64    8.89
   4  -6   2  450.56   12.66
   4  -6   1  187.55    7.94
   4  -6   0  396.76   11.91
   4  -6  -1  187.71    8.05
   4  -6  -2  453.53   13.15
   4  -6  -3  237.77    9.33
   4  -6  -4  240.73    9.52
   4  -6  -5   84.68    5.66
   4  -6  -6  518.02   15.09
   4  -6  -7  128.34    7.33
   4  -6  -8  194.32    9.26
   4  -6  -9  333.01   12.49
   4  -6 -10  258.37   11.10
   4  -6 -11   53.19    4.23
  -4   6 -11   47.78    5.28
   4  -6 -11   55.82    5.17
   4  -6 -12  135.41    6.87
  -4   6 -12  121.13    8.60
   4  -6 -12  126.74    8.02
   4  -6 -13  195.80    8.37
  -4   6 -13  177.82   10.73
  -4   6 -14   42.40    5.33
   4  -6 -14   44.83    4.05
  -4   6 -15  174.74   10.90
   4  -6 -15  186.06    8.21
  -4   6 -16  383.04   16.52
   4  -6 -16  427.38   12.79
  -4   6 -17   43.00    5.49
   4  -6 -17   43.26    3.86
   4  -6 -18    5.79    1.58
   4  -6 -19    2.52    1.02
   4  -6 -20   47.74    3.65
   4  -6 -21   47.47    3.41
   4  -6 -22   71.11    3.87
   4  -6 -23   46.47    2.83
  -4  -7 -23   23.26    2.51
  -4  -7 -22   83.36    5.37
  -4  -7 -21   20.80    3.03
  -4  -7 -20   25.22    3.66
  -4  -7 -19   14.01    2.90
  -4  -7 -18   61.04    6.38
  -4  -7 -17  106.50    8.67
  -4  -7 -16  122.62    9.52
  -4  -7 -15   93.65    8.49
  -4  -7 -14  149.96   10.70
   4   7 -13  267.25   11.46
  -4  -7 -13  274.86   14.57
   4   7 -12  332.35   12.66
   4   7 -11  112.08    7.13
  -4  -7 -11  135.77    7.56
  -4  -7 -10   24.29    3.25
   4  -7   5  328.36   10.19
   4  -7   4  168.05    7.48
   4  -7   3   30.78    3.31
   4  -7   2   41.07    3.84
   4  -7   1 1267.50   24.84
   4  -7   0 1003.69   21.63
   4  -7  -1 1238.71   24.86
   4  -7  -2   42.94    4.19
   4  -7  -3   29.07    3.40
   4  -7  -4  168.48    8.34
   4  -7  -5  348.32   12.39
   4  -7  -6   55.89    4.99
   4  -7  -7   38.43    4.26
   4  -7  -8   13.90    2.82
   4  -7  -9  129.83    7.96
   4  -7 -10   24.23    2.85
   4  -7 -10   17.07    3.00
   4  -7 -11  121.40    8.02
   4  -7 -11  117.96    6.36
   4  -7 -12  306.10   13.23
   4  -7 -12  343.27   11.17
   4  -7 -13  270.04   10.00
   4  -7 -14  156.29    7.47
   4  -7 -15   84.51    5.41
   4  -7 -16  129.91    6.68
   4  -7 -17  108.18    5.99
   4  -7 -18   71.15    4.74
   4  -7 -19   17.88    2.38
   4  -7 -20   28.35    2.77
   4  -7 -21   21.70    2.28
   4  -7 -22   87.56    4.24
   4  -7 -23   26.00    2.12
  -4  -8 -22    6.22    1.58
  -4  -8 -21   41.93    4.05
  -4  -8 -20    4.06    1.55
  -4  -8 -19   11.74    2.71
  -4  -8 -18  115.07    8.59
  -4  -8 -17  103.47    8.52
  -4  -8 -16   50.06    6.12
  -4  -8 -15   31.50    5.04
  -4  -8 -14  212.88   13.04
  -4  -8 -13    9.13    2.76
   4   8 -12   48.68    4.82
   4   8 -11   44.21    4.56
  -4  -8 -11   52.72    5.07
   4   8 -10   51.55    4.82
  -4  -8 -10   58.73    5.15
  -4  -8 -10   62.11    5.80
  -4  -8  -9   74.33    5.69
  -4  -8  -9   68.56    5.91
   4  -8   5   15.18    2.22
   4  -8   4  286.96   10.34
   4  -8   3  145.69    7.42
   4  -8   2    4.45    1.71
   4  -8   1   24.61    3.19
   4  -8   0    9.99    2.08
   4  -8  -1   20.07    2.98
   4  -8  -2    6.51    1.82
   4  -8  -3  143.17    7.92
   4  -8  -4  283.86   11.45
   4  -8  -5   13.73    2.71
   4  -8  -6  215.99   10.23
   4  -8  -7  129.80    8.00
   4  -8  -8  506.71   16.71
   4  -8  -9   71.50    4.77
   4  -8  -9   67.98    6.12
   4  -8 -10   55.55    5.62
   4  -8 -10   58.53    4.35
   4  -8 -11   40.19    4.86
   4  -8 -11   37.56    3.58
   4  -8 -12   37.06    4.92
   4  -8 -12   43.41    3.84
   4  -8 -13    8.93    1.86
   4  -8 -14  207.01    8.61
   4  -8 -15   34.72    3.52
   4  -8 -16   60.42    4.50
   4  -8 -17  101.11    5.73
   4  -8 -18  101.59    5.58
   4  -8 -19   17.19    2.32
   4  -8 -20    4.90    1.24
   4  -8 -21   41.40    3.06
   4  -8 -22    8.60    1.38
  -4  -9 -22   48.13    3.55
  -4  -9 -21    0.43    1.06
  -4  -9 -20   21.99    3.12
  -4  -9 -19   29.56    3.97
  -4  -9 -18   41.13    5.04
  -4  -9 -17  120.59    8.95
  -4  -9 -16   84.20    7.91
  -4  -9 -15  115.05    9.44
  -4  -9 -14   14.54    3.23
  -4  -9 -13   80.26    8.10
  -4  -9 -11   27.04    3.85
  -4  -9 -11   22.85    3.87
   4   9 -11   19.77    3.26
   4   9 -10  690.49   19.21
  -4  -9 -10  695.45   20.77
  -4  -9  -9   95.36    6.68
  -4  -9  -9   86.82    6.78
  -4  -9  -8  125.69    8.24
  -4  -9  -8  138.72    7.91
  -4  -9  -7  394.21   14.66
   4  -9   4  778.58   18.71
   4  -9   3  897.57   21.08
   4  -9   2  266.50   10.85
   4  -9   1    4.42    1.72
   4  -9   0   14.63    2.81
   4  -9  -1    5.07    1.58
   4  -9  -2  271.45   11.49
   4  -9  -3  911.21   22.81
   4  -9  -4  806.29   21.36
   4  -9  -5   41.06    4.66
   4  -9  -6  108.29    7.56
   4  -9  -7  385.98   14.82
   4  -9  -8  128.17    8.52
   4  -9  -8  129.61    6.35
   4  -9  -9   81.97    6.82
   4  -9  -9   82.53    5.14
   4  -9 -10  690.76   21.21
   4  -9 -10  698.01   16.54
   4  -9 -11   23.15    4.03
   4  -9 -11   21.47    2.78
   4  -9 -12   88.41    7.35
   4  -9 -12  102.40    5.94
   4  -9 -13   82.47    5.35
   4  -9 -14   20.86    2.73
   4  -9 -15  117.20    6.36
   4  -9 -16   75.41    4.98
   4  -9 -17  118.63    6.14
   4  -9 -18   37.20    3.35
   4  -9 -19   29.30    2.86
   4  -9 -20   26.84    2.60
   4  -9 -21    3.24    0.99
   4  -9 -22   49.05    3.03
  -4 -10 -21    3.67    1.26
  -4 -10 -20   26.29    3.19
  -4 -10 -19   20.04    3.16
  -4 -10 -18   18.09    3.34
  -4 -10 -17    1.37    1.36
  -4 -10 -16   55.64    6.24
  -4 -10 -15   95.00    8.53
  -4 -10 -14    2.02    2.02
  -4 -10 -11   14.11    3.04
  -4 -10 -11   18.47    3.12
   4  10 -10  575.02   17.40
  -4 -10 -10  615.12   19.54
   4  10  -9  139.31    8.04
  -4 -10  -9  148.56    8.82
  -4 -10  -9  152.08    9.28
  -4 -10  -8  122.08    7.76
  -4 -10  -8  114.75    8.09
  -4 -10  -7    0.99    1.48
  -4 -10  -7    2.44    1.66
  -4 -10  -6  306.74   13.10
  -4 -10  -6  323.42   12.49
  -4 -10  -5  588.50   18.42
  -4 -10  -4  284.44   12.41
   4 -10   3  226.54   10.12
   4 -10   2   52.35    5.02
   4 -10   1  358.85   13.55
   4 -10   0  988.57   24.36
   4 -10  -1  361.32   13.91
   4 -10  -2   56.22    5.54
   4 -10  -3  231.47   11.27
   4 -10  -4  270.27   12.38
   4 -10  -5  575.42   18.79
   4 -10  -6  304.08   13.42
   4 -10  -7    2.60    1.02
   4 -10  -7    2.23    1.40
   4 -10  -8  121.85    8.63
   4 -10  -8  126.92    6.19
   4 -10  -9  140.60    9.50
   4 -10  -9  157.88    7.13
   4 -10 -10  608.92   20.51
   4 -10 -10  621.21   15.52
   4 -10 -11   21.82    4.07
   4 -10 -11   18.89    2.61
   4 -10 -12    7.29    1.75
   4 -10 -13  502.04   13.92
   4 -10 -14    4.67    1.54
   4 -10 -15   95.14    5.66
   4 -10 -16   63.67    4.53
   4 -10 -17    2.69    1.23
   4 -10 -18   22.12    2.60
   4 -10 -19   18.62    2.27
   4 -10 -20   29.29    2.60
   4 -10 -21    3.97    1.01
  -4 -11 -21   93.71    4.70
  -4 -11 -20   26.21    2.97
  -4 -11 -19   10.65    2.17
  -4 -11 -18   86.63    6.55
  -4 -11 -17   62.33    6.06
  -4 -11 -16   46.80    5.58
  -4  11  15   84.22    5.08
  -4 -11 -15   76.04    7.46
  -4 -11 -14   60.96    6.93
  -4 -11 -11   98.93    7.53
  -4 -11 -10   69.78    6.36
   4  11  -9  267.95   11.33
  -4 -11  -9  286.03   12.85
  -4 -11  -9  298.04   12.84
   4  11  -8  138.91    8.04
  -4 -11  -8  151.29    9.34
  -4 -11  -8  152.46    9.14
  -4 -11  -7   41.86    5.03
  -4 -11  -7   41.24    4.76
  -4 -11  -6  573.08   18.87
  -4 -11  -6  593.15   17.96
  -4 -11  -5   47.40    5.34
  -4 -11  -5   48.23    4.88
  -4 -11  -4  388.75   15.23
  -4 -11  -4  424.85   14.79
  -4 -11  -3  245.49   11.89
  -4 -11  -3  268.62   11.49
   4 -11   3  240.87   10.90
  -4 -11  -2  190.84   10.37
   4 -11   2  172.49    9.50
  -4 -11  -1   17.39    3.29
   4 -11   1   12.34    2.87
  -4 -11   0  239.82   11.80
   4 -11   0  248.89   11.83
  -4 -11   1   12.66    3.13
   4 -11  -1   15.92    3.15
  -4 -11   2  179.85   10.20
   4 -11  -2  182.72   10.34
  -4 -11   3  228.38   11.61
   4 -11  -3  252.43   12.28
   4 -11  -4  394.52   15.59
  -4 -11   4  345.23   14.80
  -4 -11   5   43.13    5.28
   4 -11  -5   46.52    5.48
   4 -11  -6  555.79   19.45
   4 -11  -7   41.58    5.33
   4 -11  -8  162.34    7.14
   4 -11  -8  150.56   10.03
   4 -11  -9  275.93   13.86
   4 -11  -9  294.47   10.03
   4 -11 -10   70.43    4.89
   4 -11 -11   94.56    5.74
   4 -11 -12   74.33    5.08
   4 -11 -13    6.32    1.62
   4 -11 -14   61.69    4.60
   4 -11 -15   83.84    5.27
   4 -11 -16   44.60    3.78
   4 -11 -17   69.73    4.55
   4 -11 -18   79.50    4.67
   4 -11 -19   12.21    1.78
   4 -11 -20   23.73    2.34
   4 -11 -21   88.00    4.03
  -4 -12 -20   55.91    3.77
  -4 -12 -19   40.10    3.70
  -4 -12 -18   21.16    3.09
  -4 -12 -17   40.50    4.64
  -4 -12 -16    3.70    2.00
  -4  12  16    5.84    1.33
  -4  12  15   38.99    3.47
  -4 -12 -15   38.18    5.16
  -4 -12 -14   18.19    3.69
  -4  12  14   22.32    2.67
  -4  12  13   20.75    2.67
  -4 -12 -11   36.41    4.60
  -4 -12 -10  217.13   11.26
  -4 -12  -9  493.82   17.37
  -4 -12  -8   81.26    6.98
  -4 -12  -7  198.80   10.94
   4  12  -7  188.60    9.30
  -4 -12  -7  205.32   10.69
  -4 -12  -6   49.01    5.51
  -4 -12  -6   61.93    5.90
  -4 -12  -5  113.23    8.27
  -4 -12  -5  134.55    8.56
  -4 -12  -4  366.38   15.01
  -4 -12  -4  405.09   14.90
  -4 -12  -3   86.97    7.15
  -4 -12  -3   98.94    7.21
  -4 -12  -2  605.76   19.72
  -4 -12  -2  635.55   18.83
   4 -12   2  612.16   19.24
  -4 -12  -1  308.12   13.74
  -4 -12  -1  326.54   13.06
   4 -12   1  305.34   13.52
  -4 -12   0    1.74    2.13
  -4 -12   0    2.03    1.54
   4 -12   0    0.60    1.86
  -4 -12   1  312.06   13.91
  -4 -12   1  327.39   12.83
   4 -12  -1  308.91   14.11
  -4 -12   2  560.08   19.47
   4 -12  -2  615.58   20.52
  -4 -12   3  102.86    6.82
   4 -12  -3  101.27    8.08
  -4 -12   4  337.06   14.82
   4 -12  -4  374.33   15.96
  -4 -12   5  105.41    8.23
   4 -12  -5  113.66    8.82
  -4 -12   6   43.41    5.45
   4 -12  -6   53.54    6.07
   4 -12  -7  196.79   11.70
   4 -12  -9  549.41   14.51
   4 -12 -10  222.25    8.93
   4 -12 -11   35.54    3.54
   4 -12 -12   98.31    5.88
   4 -12 -13   20.41    2.63
   4 -12 -14   19.10    2.56
   4 -12 -15   39.56    3.62
   4 -12 -16    4.22    1.35
   4 -12 -17   32.17    3.11
   4 -12 -18   18.65    2.27
   4 -12 -19   39.12    3.01
   4 -12 -20   53.34    3.22
  -4 -13 -19    9.53    1.68
  -4 -13 -18   16.89    2.48
  -4 -13 -17    9.13    2.14
  -4 -13 -16    2.87    1.54
  -4  13  16    8.03    1.55
  -4  13  15   76.26    4.52
  -4 -13 -15   68.12    6.52
  -4  13  14   57.52    4.11
  -4 -13 -14   50.60    6.00
  -4  13  13   64.91    4.49
  -4  13  12  122.84    6.36
  -4 -13 -11    6.42    1.95
  -4  13  11    9.58    2.02
  -4 -13 -10   31.98    4.35
  -4 -13  -9  125.17    8.45
  -4 -13  -8   54.28    5.83
  -4 -13  -7  120.32    8.52
  -4 -13  -6  120.75    8.55
  -4 -13  -5  498.26   17.84
  -4 -13  -4   34.84    4.70
  -4 -13  -4   29.67    4.17
  -4 -13  -3  239.21   12.19
  -4 -13  -3  262.35   12.36
  -4 -13  -2  157.08    9.91
  -4 -13  -2  172.24    9.86
  -4 -13  -1  346.41   14.97
  -4 -13  -1  389.04   14.92
   4 -13   1  343.45   14.79
  -4 -13   0   11.07    3.29
  -4 -13   0   12.64    2.97
  -4 -13   1  346.74   15.10
   4 -13  -1  364.06   15.82
  -4 -13   2  152.69    9.95
   4 -13  -2  153.03   10.27
  -4 -13   2  169.45    9.29
  -4 -13   3  220.69   12.02
   4 -13  -3  241.78   12.97
  -4 -13   4   35.12    4.69
   4 -13  -4   35.37    5.09
  -4 -13   5  419.78   16.81
  -4 -13   6  102.91    8.18
   4 -13  -9  153.07    7.34
   4 -13 -10   34.10    3.51
   4 -13 -11    9.04    2.08
   4 -13 -12  129.84    6.81
   4 -13 -13   76.53    5.15
   4 -13 -14   53.11    4.29
   4 -13 -15   74.16    4.86
   4 -13 -16    7.62    1.60
   4 -13 -17    8.93    1.56
   4 -13 -18   12.42    1.80
   4 -13 -19    8.17    1.36
  -4 -14 -18   37.41    3.18
  -4 -14 -17   38.73    3.70
  -4 -14 -16   18.41    2.90
  -4  14  16   16.01    1.87
  -4 -14 -15   14.06    2.90
  -4  14  15   14.77    2.03
  -4 -14 -14    2.31    1.66
  -4  14  14    2.82    1.21
  -4 -14 -13    2.47    1.59
  -4  14  13    2.44    1.14
  -4  14  12   30.95    3.17
  -4  14  11  236.17    8.90
  -4 -14 -11  235.64   11.10
  -4 -14 -10   96.79    7.29
  -4  14  10  100.49    5.81
  -4  14   9  149.79    7.13
  -4 -14  -9  127.10    8.42
  -4 -14  -8   11.91    2.84
  -4 -14  -7  261.19   12.66
  -4 -14  -6    0.98    1.47
  -4 -14  -5  142.93    9.39
  -4 -14  -4    6.42    2.48
  -4 -14  -3   44.25    5.23
  -4 -14  -2   68.84    6.61
  -4 -14  -1  300.15   13.94
  -4  14   1  301.32   10.09
  -4 -14   0  168.85   10.45
  -4  14   0  172.62    7.40
  -4 -14   1  297.09   13.90
  -4  14  -1  297.27    9.64
  -4 -14   2   75.48    7.12
  -4 -14   3   48.48    5.66
  -4 -14   4    9.34    2.97
  -4 -14   5  123.19    8.95
  -4 -14   6    1.22    1.30
  -4 -14   7  223.01   11.91
   4 -14 -10  113.35    6.37
   4 -14 -11  272.28   10.12
   4 -14 -12   33.55    3.53
   4 -14 -13    4.47    1.35
   4 -14 -14    1.94    1.26
   4 -14 -15   17.92    2.44
   4 -14 -16   14.94    2.16
   4 -14 -17   36.35    2.96
  -4 -15 -17   26.68    2.66
  -4 -15 -16   22.70    2.88
  -4  15  15  100.38    4.64
  -4 -15 -15   98.93    6.53
  -4 -15 -14    3.23    1.70
  -4  15  14    5.47    1.27
  -4 -15 -13    8.48    2.50
  -4  15  13   15.18    2.07
  -4  15  12   23.41    2.66
  -4  15  11   68.03    4.53
  -4 -15 -11   73.56    5.76
  -4  15  10  186.40    7.68
  -4 -15 -10  182.31    9.57
  -4  15   9   97.40    5.66
  -4 -15  -9   90.01    6.91
  -4 -15  -8   13.03    2.80
  -4  15   8   20.91    2.70
  -4 -15  -7   25.63    3.99
  -4  15   7   33.03    3.47
  -4  15   6  116.03    6.27
  -4 -15  -6  122.51    8.46
  -4  15   5  105.31    5.99
  -4 -15  -5  105.15    7.97
  -4 -15  -4   72.57    6.78
  -4  15   4   71.83    4.94
  -4 -15  -3  135.61    9.26
  -4  15   3  150.37    7.14
  -4 -15  -2   34.52    5.00
  -4  15   2   41.55    3.78
  -4 -15  -1   89.88    7.63
  -4  15   1   90.50    5.38
  -4 -15   0  253.82   12.87
  -4  15   0  262.58    9.24
  -4 -15   1   87.44    7.63
  -4  15  -1   89.97    5.16
  -4 -15   2   30.35    4.68
  -4 -15   3  126.76    9.05
  -4 -15   4   56.21    6.03
  -4 -15   5   83.97    7.26
  -4 -15   6   93.12    7.67
  -4 -15   7   26.03    4.25
   4 -15 -12   27.47    3.13
   4 -15 -13   13.02    2.09
   4 -15 -14    3.81    1.29
  -4 -16 -15    2.95    1.25
  -4  16  15    0.81    0.66
  -4 -16 -14   19.38    2.89
  -4  16  14   22.43    2.20
  -4  16  13   44.27    3.22
  -4 -16 -13   29.05    3.83
  -4  16  12   19.68    2.29
  -4  16  11   47.84    3.66
  -4 -16 -11   45.74    4.22
  -4 -16 -10   49.13    4.65
  -4  16  10   48.23    3.75
  -4  16   9  181.38    7.53
  -4 -16  -9  170.22    9.08
  -4  16   8   89.48    5.32
  -4 -16  -8   86.23    6.53
  -4 -16  -7   20.96    3.43
  -4  16   7   29.19    3.19
  -4 -16  -6    1.35    1.36
  -4  16   6    2.26    1.29
  -4 -16  -5   22.01    3.77
  -4  16   5   26.15    3.02
  -4 -16  -4   51.71    5.62
  -4  16   4   52.68    4.19
  -4 -16  -3  223.21   11.77
  -4  16   3  228.90    8.84
  -4 -16  -2    6.88    2.55
  -4  16   2    7.28    1.86
  -4 -16  -1  184.31   10.74
  -4  16   1  189.59    7.83
  -4 -16   0   14.54    3.23
  -4  16   0   13.47    2.18
  -4 -16   1  172.51   10.50
  -4  16  -1  181.71    7.29
  -4 -16   2    6.71    2.77
  -4 -16   3  195.81   11.05
  -4 -16   4   36.94    4.97
  -4 -16   5   25.92    4.06
  -4 -16   6    2.04    1.79
  -4 -16   7   18.08    3.22
  -4 -17 -14   23.80    2.68
  -4  17  13   35.64    2.67
  -4 -17 -13   19.90    2.84
  -4  17  12   26.47    2.44
  -4 -17 -12   16.32    2.83
  -4  17  11   74.02    4.23
  -4 -17 -10    1.37    1.19
  -4  17  10   -0.09    0.93
  -4 -17  -9   79.74    5.71
  -4  17   9   89.57    4.98
  -4 -17  -8   15.82    2.82
  -4  17   8   15.75    2.31
  -4  17   7   62.70    4.37
  -4 -17  -7   57.92    5.22
  -4 -17  -6    5.33    1.82
  -4  17   6    4.13    1.44
  -4 -17  -5    9.34    2.35
  -4  17   5   15.51    2.33
  -4 -17  -4    7.36    2.36
  -4  17   4    7.22    1.77
  -4  17   3   88.07    5.27
  -4 -17  -3   77.28    6.66
  -4  17   2   30.81    3.17
  -4 -17  -2   27.08    4.15
  -4  17   1   43.54    3.69
  -4 -17  -1   43.35    5.15
  -4 -17   0   11.06    2.72
  -4  17   0   14.12    2.18
  -4 -17   1   34.42    4.59
  -4  17  -1   37.78    3.19
  -4 -17   2   24.26    3.83
  -4 -17   3   70.33    6.33
  -4 -17   4    2.68    1.76
  -4 -17   5    9.14    2.44
  -4 -17   6    3.46    1.55
  -4 -17   7   46.66    4.68
  -4  18  12   55.10    3.09
  -4 -18 -12   27.93    2.95
  -4 -18 -11    2.78    1.39
  -4  18  11    5.37    1.23
  -4  18  10   40.77    3.04
  -4 -18 -10   35.58    3.16
  -4  18   9   35.34    2.94
  -4 -18  -9   33.51    3.38
  -4  18   8   83.84    4.62
  -4 -18  -8   79.24    5.46
  -4 -18  -7    1.92    1.02
  -4  18   7    3.42    1.20
  -4 -18  -6    6.44    1.89
  -4  18   6    5.21    1.35
  -4 -18  -5   19.72    3.13
  -4  18   5   21.93    2.53
  -4 -18  -4   16.41    2.98
  -4  18   4   19.28    2.45
  -4 -18  -3   50.76    5.13
  -4  18   3   56.78    4.01
  -4 -18  -2  114.32    7.65
  -4  18   2  116.95    5.76
  -4 -18  -1   18.41    3.28
  -4  18   1   18.51    2.41
  -4 -18   0   38.41    4.52
  -4  18   0   47.60    3.56
  -4 -18   1   18.02    3.10
  -4 -18   2  107.74    7.28
  -4 -18   3   41.49    4.49
  -4 -18   4   15.42    2.81
  -4 -18   5   18.09    3.00
  -4 -18   6    4.96    1.54
  -4  19  10   45.87    2.85
  -4  19   9   40.65    2.85
  -4 -19  -8    0.24    0.75
  -4  19   8    2.30    0.99
  -4  19   7   39.53    2.99
  -4 -19  -7   40.65    3.65
  -4  19   6  124.73    5.49
  -4 -19  -6  127.40    6.78
  -4 -19  -5   13.21    2.38
  -4  19   5   14.70    2.03
  -4  19   4   30.24    2.75
  -4 -19  -4   34.25    3.77
  -4 -19  -3   65.40    5.17
  -4  19   3   71.28    4.20
  -4 -19  -2    9.67    2.18
  -4  19   2    9.57    1.58
  -4 -19  -1   -1.65    1.44
  -4  19   1    2.01    0.93
  -4 -19   0    1.69    1.07
  -4 -19   1    0.10    1.16
  -4 -19   2    6.57    1.68
  -4 -19   3   55.28    4.65
  -4 -19   4   26.37    3.16
  -4 -19   5   11.01    2.05
  -4 -19   6   87.52    4.95
  -4  20   7    9.92    1.40
  -4  20   6   15.84    1.74
  -4 -20  -6   14.91    2.03
  -4  20   5   23.98    2.20
  -4 -20  -5   24.67    2.69
  -4 -20  -4    5.73    1.50
  -4  20   4    3.78    1.03
  -4 -20  -3   12.70    2.11
  -4  20   3   14.06    1.68
  -4  20   2   15.82    1.79
  -4 -20  -2   20.65    2.65
  -4 -20  -1   29.82    3.19
  -4 -20   0   69.35    4.74
  -4 -20   1   33.05    3.30
  -4 -20   2   20.65    2.57
  -4 -20   3   13.67    2.01
  -4 -20   4    1.08    0.74
  -4 -21  -2   48.68    3.34
  -4 -21  -1    8.56    1.46
  -4 -21   0   23.90    2.33
   5   0   0    0.95    0.74
   5   0   1    6.58    1.34
   5   0  -1    9.39    1.57
   5   0  -2 1429.72   24.12
   5   0   2 1441.12   24.12
   5   0   3    2.78    1.02
   5   0  -3    0.77    0.76
   5   0  -4  653.19   14.64
   5   0  -5  394.47   10.99
   5   0  -6    0.99    0.76
   5   0  -7  493.18   12.87
   5   0  -8  524.00   13.54
   5   0  -9  338.65   10.53
   5   0 -10   42.18    3.60
   5   0 -11    4.05    1.35
   5   0 -12  198.71    8.54
  -5   0 -13  243.01   11.55
   5   0 -13  264.88   10.16
  -5   0 -14   10.34    2.63
   5   0 -14   10.96    2.19
   5   0 -15  362.05   12.44
  -5   0 -15  357.84   14.57
   5   0 -16  277.92   10.69
  -5   0 -16  258.24   12.32
  -5   0 -17   10.02    2.66
   5   0 -17   10.18    2.08
   5   0 -18   51.33    4.25
  -5   0 -18   41.26    4.89
   5   0 -19    1.31    1.04
  -5   0 -19    2.16    1.78
  -5   0 -20  145.89    8.35
   5   0 -20  147.39    6.29
  -5   0 -21  132.39    7.54
   5   0 -21  138.72    5.47
  -5   0 -22   53.28    4.55
  -5   0 -23    3.79    1.50
  -5  -1 -23   25.78    2.80
  -5  -1 -22   89.82    5.79
  -5  -1 -21   42.17    4.32
   5   1 -21   44.72    2.98
  -5  -1 -20   44.84    4.71
   5   1 -20   51.03    3.58
  -5  -1 -19   66.88    5.93
   5   1 -19   79.43    4.86
   5   1 -18  276.12    9.93
  -5  -1 -18  279.48   12.53
   5   1 -17   40.47    3.89
  -5  -1 -17   40.61    4.96
  -5  -1 -16   15.06    3.09
   5   1 -16   16.72    2.71
   5   1 -15  105.18    6.47
  -5  -1 -15  100.04    7.75
   5   1 -14  506.82   15.21
   5   1 -14  526.53   15.18
  -5  -1 -14  518.57   17.66
   5   1 -13  176.92    8.56
  -5  -1 -13  189.73   10.40
   5   1 -12  170.48    8.23
   5   1 -11   48.06    4.28
   5   1  -9  100.30    5.42
   5   1  -8  304.64    9.63
   5   1  -7   80.19    4.73
   5   1  -6   11.81    1.94
   5   1  -5   11.87    1.82
   5   1  -4  219.93    7.86
   5  -1   4  236.41    8.05
   5   1  -3  295.15    9.03
   5  -1   3  294.95    9.13
   5  -1   2  266.65    8.72
   5   1  -2  264.70    8.49
   5  -1   1  249.79    8.35
   5   1  -1  250.56    8.15
   5  -1   0  136.27    6.03
   5   1   0  139.24    5.92
   5  -1  -1  252.65    8.40
   5   1   1  239.93    7.95
   5  -1  -2  271.92    8.81
   5   1   2  266.49    8.45
   5  -1  -3  278.37    9.05
   5  -1  -4  233.39    8.30
   5  -1  -5   13.61    2.07
   5  -1  -6   11.25    1.95
   5  -1  -7   74.88    4.82
   5  -1  -8  307.45   10.26
   5  -1  -9  104.64    5.87
   5  -1 -10  533.03   14.21
   5  -1 -11   52.36    4.11
   5  -1 -12  183.63    7.93
   5  -1 -13  191.36    8.67
  -5   1 -13  190.64   10.18
   5  -1 -14  532.35   15.29
  -5   1 -14  519.15   17.36
   5  -1 -15   99.77    6.29
  -5   1 -15   96.93    7.33
  -5   1 -16   15.70    3.17
   5  -1 -16   17.96    2.68
   5  -1 -17   42.68    4.07
  -5   1 -17   44.51    5.07
  -5   1 -18  288.38   12.63
   5  -1 -18  279.96   10.12
  -5   1 -19   60.18    5.64
   5  -1 -19   70.94    4.65
  -5   1 -20   56.43    5.57
   5  -1 -20   52.48    3.75
  -5   1 -21   43.15    4.41
   5  -1 -21   47.34    3.25
  -5   1 -22   93.04    5.74
   5  -1 -22   79.37    3.72
  -5  -2 -23   26.85    2.73
  -5  -2 -22  121.27    6.46
  -5  -2 -21   73.56    5.50
  -5  -2 -20   43.46    4.53
   5   2 -20   48.57    3.36
  -5  -2 -19    2.68    1.63
   5   2 -19    5.83    1.49
  -5  -2 -18   12.84    2.82
   5   2 -18   13.05    2.16
   5   2 -17  194.73    8.50
  -5  -2 -17  191.44   10.63
   5   2 -16  103.67    6.30
  -5  -2 -16   98.94    7.74
  -5  -2 -15   32.29    4.38
   5   2 -15   36.77    3.83
  -5  -2 -14   27.19    4.18
   5   2 -14   30.28    3.70
   5   2 -13  106.22    6.76
  -5  -2 -13  112.34    7.99
   5   2 -12  158.63    8.18
  -5  -2 -12  150.40    9.17
   5   2  -9    9.66    1.71
   5   2  -8  268.76    8.86
   5   2  -7  253.20    8.53
   5   2  -6   71.27    4.39
   5  -2   5   51.26    3.80
   5   2  -5   59.85    3.93
   5  -2   4  269.04    8.91
   5   2  -4  264.78    8.53
   5  -2   3    3.10    1.22
   5   2  -3    3.37    1.08
   5  -2   2  656.77   14.82
   5   2  -2  662.19   14.35
   5  -2   1  924.94   18.36
   5   2  -1  898.65   17.53
   5  -2   0 1563.38   26.43
   5  -2  -1  936.13   18.79
   5  -2  -2  662.95   15.23
   5  -2  -3    4.06    1.45
   5  -2  -4  270.85    9.28
   5  -2  -5   55.43    4.21
   5  -2  -6   71.71    4.81
   5  -2  -7  241.96    9.19
   5  -2  -8  269.85    9.90
   5  -2  -9   13.84    2.36
   5  -2 -10  118.35    6.68
   5  -2 -11  415.62   12.87
   5  -2 -12  151.51    7.55
   5  -2 -13  112.03    6.59
  -5   2 -13  111.97    7.69
   5  -2 -14   33.53    3.73
  -5   2 -14   48.06    5.07
   5  -2 -15   40.26    3.96
  -5   2 -15   36.78    4.71
   5  -2 -16   98.57    6.23
  -5   2 -16  106.37    7.78
  -5   2 -17  194.71   10.49
   5  -2 -17  193.01    8.59
   5  -2 -18   13.74    2.27
  -5   2 -18   13.65    3.00
   5  -2 -19    3.27    1.17
  -5   2 -19    2.53    1.76
  -5   2 -20   46.44    4.69
   5  -2 -20   49.80    3.66
  -5   2 -21   76.80    5.66
   5  -2 -21   74.60    4.08
   5  -2 -22  119.16    4.70
  -5  -3 -23   40.74    3.24
  -5  -3 -22    4.29    1.24
  -5  -3 -21   56.15    4.76
  -5  -3 -20    5.43    1.69
  -5  -3 -19  229.00   11.06
   5   3 -19  245.19    8.26
  -5  -3 -18   11.39    2.71
   5   3 -18   14.31    2.23
   5   3 -17  159.24    7.54
  -5  -3 -17  148.17    9.40
   5   3 -16  371.72   12.24
  -5  -3 -16  355.51   14.97
   5   3 -15  119.82    6.83
  -5  -3 -15  115.73    8.47
  -5  -3 -14   70.91    6.56
   5   3 -14   77.34    5.98
   5   3 -13  198.20    9.52
  -5  -3 -13  211.77   11.19
  -5  -3 -12   69.05    6.36
   5   3 -12   64.58    5.40
  -5   3  12   75.64    5.65
  -5  -3 -11  268.46   11.59
  -5   3  11  258.30   10.61
   5  -3   6  907.70   18.03
   5  -3   5  554.00   13.59
   5  -3   4   39.55    3.42
   5  -3   3  583.24   14.30
   5  -3   2  196.37    7.69
   5  -3   1  216.05    8.19
   5  -3   0  117.40    5.97
   5  -3  -1  222.92    8.39
   5  -3  -2  200.83    8.02
   5  -3  -3  575.83   14.60
   5  -3  -4   37.97    3.54
   5  -3  -5  546.86   14.53
   5  -3  -6  938.01   20.32
   5  -3  -7  309.34   10.98
   5  -3  -8  173.26    8.27
   5  -3  -9  351.69   12.05
   5  -3 -10    4.40    1.47
   5  -3 -11  255.69    9.77
   5  -3 -11  267.70   10.60
   5  -3 -12   77.28    5.36
   5  -3 -13  224.63    9.39
  -5   3 -13  207.57   10.62
   5  -3 -14   81.87    5.60
  -5   3 -14   79.07    6.71
   5  -3 -15  117.47    6.81
  -5   3 -15  112.68    8.09
   5  -3 -16  365.01   12.23
  -5   3 -16  358.18   14.70
  -5   3 -17  162.92    9.65
   5  -3 -17  160.15    7.75
   5  -3 -18   14.03    2.33
  -5   3 -18   12.88    2.94
  -5   3 -19  230.69   10.95
   5  -3 -19  249.30    8.95
   5  -3 -20    7.89    1.59
  -5   3 -20    2.45    1.62
   5  -3 -21   49.40    3.34
   5  -3 -22    5.15    1.08
   5  -3 -23   38.15    2.26
  -5  -4 -23   32.19    2.76
  -5  -4 -22    6.05    1.44
  -5  -4 -21   13.05    2.35
  -5  -4 -20   13.11    2.63
  -5  -4 -19   45.02    4.91
  -5  -4 -18   44.19    5.00
   5   4 -17  158.28    7.36
  -5  -4 -17  156.37    9.66
   5   4 -16  188.68    8.35
  -5  -4 -16  176.80   10.51
   5   4 -15  227.61    9.41
  -5  -4 -15  227.47   12.00
  -5  -4 -14    6.61    2.52
   5   4 -13  355.04   13.32
  -5  -4 -13  368.95   15.35
   5   4 -12  108.99    7.15
  -5   4  12  108.40    6.82
  -5  -4 -12  110.39    8.20
  -5   4  11   34.47    3.90
  -5  -4 -11   34.51    4.16
   5  -4   6   38.81    3.34
   5  -4   5   19.05    2.39
   5  -4   4  243.64    8.87
   5  -4   3  256.02    9.19
   5  -4   2  716.93   16.60
   5  -4   1  209.30    8.31
   5  -4   0   78.61    5.11
   5  -4  -1  206.83    8.44
   5  -4  -2  709.12   16.98
   5  -4  -3  268.70    9.94
   5  -4  -4  242.42    9.47
   5  -4  -5   19.55    2.82
   5  -4  -6   36.21    3.80
   5  -4  -7  229.47    9.77
   5  -4  -8   54.19    4.75
   5  -4  -9  238.40   10.22
   5  -4 -10  398.70   12.35
   5  -4 -10  405.90   13.76
   5  -4 -11   31.83    3.44
   5  -4 -11   34.24    4.02
   5  -4 -12  109.34    6.39
   5  -4 -13  380.91   12.52
  -5   4 -13  387.38   14.95
   5  -4 -14    6.65    1.78
  -5   4 -14    8.05    2.46
   5  -4 -15  233.16    9.62
  -5   4 -15  234.30   11.78
  -5   4 -16  180.25   10.25
   5  -4 -16  184.54    8.37
  -5   4 -17  148.70    9.28
   5  -4 -17  151.73    7.43
  -5   4 -18   40.15    4.78
   5  -4 -18   42.87    3.79
  -5   4 -19   46.50    4.93
   5  -4 -19   50.05    3.90
   5  -4 -20   14.26    2.02
   5  -4 -21   12.06    1.70
   5  -4 -22    8.73    1.30
   5  -4 -23   33.40    2.16
  -5  -5 -22   16.24    2.30
  -5  -5 -21   49.28    4.29
  -5  -5 -20  144.18    8.02
  -5  -5 -19    3.66    1.45
  -5  -5 -18    6.26    2.02
  -5  -5 -17  150.54    9.52
  -5  -5 -16    7.65    2.59
   5   5 -16    6.05    1.46
  -5  -5 -15    0.15    1.64
  -5  -5 -14   18.69    3.65
   5   5 -13  393.05   14.24
  -5  -5 -13  405.95   16.42
  -5  -5 -12    0.46    1.90
   5   5 -12    2.87    1.25
  -5   5  12    3.28    1.65
  -5  -5 -11  125.68    8.76
  -5   5  11  121.93    7.21
  -5  -5 -11  136.08    8.59
  -5   5  10  177.94    8.61
  -5  -5 -10  191.96   10.11
   5  -5   6  340.70   10.30
   5  -5   5    5.40    1.53
   5  -5   4  365.35   11.34
   5  -5   3  209.26    8.62
   5  -5   2  519.07   14.18
   5  -5   1  123.93    6.61
   5  -5   0   51.82    4.31
   5  -5  -1  128.31    6.86
   5  -5  -2  513.32   14.57
   5  -5  -3  218.62    9.28
   5  -5  -4  361.22   12.37
   5  -5  -5    7.39    2.10
   5  -5  -6  342.09   12.32
   5  -5  -7  372.32   13.11
   5  -5  -8   46.33    4.58
   5  -5  -9  168.12    8.94
   5  -5 -10  184.86    8.20
   5  -5 -10  183.98    9.52
   5  -5 -11  122.71    6.66
   5  -5 -11  110.79    7.41
   5  -5 -12    0.40    0.90
   5  -5 -12    1.36    1.49
   5  -5 -13  403.23   12.90
  -5   5 -13  410.29   15.75
   5  -5 -14   17.27    2.68
  -5   5 -14   18.85    3.63
   5  -5 -15    6.11    1.83
  -5   5 -15    4.61    2.11
   5  -5 -16    8.82    1.96
  -5   5 -16    7.45    2.54
  -5   5 -17  156.93    9.42
   5  -5 -17  153.08    7.33
   5  -5 -18    8.12    1.70
   5  -5 -19   10.23    1.83
   5  -5 -20  160.11    6.48
   5  -5 -21   52.26    3.37
   5  -5 -22   13.62    1.62
  -5  -6 -22   26.57    2.74
  -5  -6 -21   36.67    3.60
  -5  -6 -20   49.03    4.56
  -5  -6 -19   20.10    3.19
  -5  -6 -18   41.32    4.82
  -5  -6 -17   18.31    3.28
  -5  -6 -16    6.88    2.37
  -5  -6 -15  325.35   14.87
  -5  -6 -14  310.35   14.58
  -5  -6 -13  686.83   22.30
  -5  -6 -12   14.38    3.22
  -5  -6 -12   13.83    3.16
   5   6 -12   16.62    2.93
  -5   6  11  115.35    7.14
  -5  -6 -11  124.51    8.37
  -5  -6 -11  107.58    8.37
  -5  -6 -10   23.74    3.71
  -5  -6 -10   19.70    3.41
  -5   6  10   22.41    3.13
  -5   6   9   88.95    5.99
  -5  -6  -9   97.15    7.31
  -5   6   8  103.87    6.33
   5  -6   5  589.54   14.88
   5  -6   4  110.89    6.30
   5  -6   3  690.59   17.15
   5  -6   2   46.13    4.13
   5  -6   1   55.71    4.63
   5  -6   0    7.44    1.87
   5  -6  -1   51.28    4.63
   5  -6  -2   41.73    4.18
   5  -6  -3  656.85   17.68
   5  -6  -4  114.62    7.02
   5  -6  -5  607.81   17.30
   5  -6  -6  128.78    7.67
   5  -6  -7  105.97    7.06
   5  -6  -8  122.03    7.79
   5  -6  -9   99.18    5.84
   5  -6  -9   85.82    6.64
   5  -6 -10   21.54    2.83
   5  -6 -10   23.26    3.51
   5  -6 -11  107.22    6.29
   5  -6 -11  102.11    7.54
   5  -6 -12   16.13    2.53
   5  -6 -12    8.40    2.58
   5  -6 -13  653.74   16.76
   5  -6 -14  308.24   11.03
   5  -6 -15  337.51   11.49
   5  -6 -16    4.39    1.51
   5  -6 -17   18.71    2.63
   5  -6 -18   45.41    3.76
   5  -6 -19   21.60    2.51
   5  -6 -20   50.73    3.51
   5  -6 -21   39.05    2.92
   5  -6 -22   29.27    2.28
  -5  -7 -22  131.91    5.55
  -5  -7 -21   81.72    5.09
  -5  -7 -20    2.54    1.19
  -5  -7 -19   58.80    5.25
  -5  -7 -18   58.54    5.52
  -5  -7 -17    9.65    2.67
  -5  -7 -16   50.59    5.64
  -5  -7 -15   31.48    4.65
  -5  -7 -14   32.85    4.87
  -5  -7 -13  115.94    8.93
   5   7 -12   31.87    4.05
  -5  -7 -12   28.85    4.45
  -5  -7 -12   36.19    4.47
   5   7 -11  145.64    8.64
  -5  -7 -11  172.75    8.98
  -5  -7 -11  141.11    9.72
  -5  -7 -11  148.17    9.28
  -5   7  10  116.57    7.10
  -5  -7 -10  131.83    8.67
  -5  -7  -9  184.88   10.24
  -5   7   9  184.17    8.83
  -5   7   8  117.62    6.90
  -5  -7  -8  135.86    8.53
  -5   7   7  255.21   10.14
  -5  -7  -7  282.57   12.26
   5  -7   5  279.92   10.07
   5  -7   4  167.18    8.03
   5  -7   3   52.41    4.57
   5  -7   2  538.36   15.70
   5  -7   1  807.41   20.14
   5  -7   0   23.23    3.42
   5  -7  -1  805.55   20.46
   5  -7  -2  543.99   16.43
   5  -7  -3   53.54    4.99
   5  -7  -4  175.50    9.09
   5  -7  -5  293.19   12.10
   5  -7  -6  152.69    8.70
   5  -7  -7  277.96   12.15
   5  -7  -8  128.87    6.64
   5  -7  -8  129.28    8.29
   5  -7  -9  183.94    8.12
   5  -7  -9  190.32   10.30
   5  -7 -10  126.35    6.74
   5  -7 -10  122.27    8.35
   5  -7 -11  138.13    7.14
   5  -7 -11  136.59    8.98
   5  -7 -12   25.81    4.07
   5  -7 -12   36.34    3.68
   5  -7 -13  114.92    6.55
   5  -7 -14   37.40    3.74
   5  -7 -15   38.01    3.74
   5  -7 -16   46.85    3.99
   5  -7 -17   10.59    1.99
   5  -7 -18   66.74    4.45
   5  -7 -19   58.14    3.93
   5  -7 -20    4.73    1.24
   5  -7 -21   83.24    4.11
   5  -7 -22  136.99    4.90
  -5  -8 -21   14.93    2.09
  -5  -8 -20   82.08    5.37
  -5  -8 -19   11.79    2.24
  -5  -8 -18   26.66    3.65
  -5  -8 -17   64.25    6.02
  -5  -8 -16   98.49    7.89
  -5  -8 -15  147.25    9.89
  -5  -8 -14   75.92    7.36
  -5  -8 -13   80.48    7.56
  -5  -8 -12  119.66    9.10
  -5  -8 -12  118.87    8.21
   5   8 -11   79.13    6.32
  -5  -8 -11   84.22    6.43
  -5  -8 -11   83.20    6.94
  -5  -8 -10   11.22    2.78
  -5  -8 -10   14.60    2.98
  -5  -8  -9  194.80   10.66
  -5   8   8   67.79    5.34
  -5  -8  -8   70.71    6.27
  -5   8   7  129.04    7.30
  -5  -8  -7  134.73    8.54
  -5   8   6  303.40   11.26
  -5  -8  -6  332.03   13.29
  -5  -8  -5  138.53    8.47
  -5   8   5  120.98    6.83
   5  -8   4  394.73   13.00
   5  -8   3  177.21    8.76
   5  -8   2  223.47   10.12
   5  -8   1  182.53    9.26
   5  -8   0   56.16    5.19
   5  -8  -1  170.95    9.19
   5  -8  -2  201.73   10.08
   5  -8  -3  173.74    9.37
   5  -8  -4  391.33   14.60
   5  -8  -5  130.71    8.36
   5  -8  -6  333.07   13.74
   5  -8  -7  137.96    8.76
   5  -8  -7  148.71    7.01
   5  -8  -8   57.76    5.73
   5  -8  -8   66.41    4.68
   5  -8  -9  191.24   10.67
   5  -8  -9  195.77    8.35
   5  -8 -10   15.71    2.50
   5  -8 -10   17.90    3.73
   5  -8 -11   68.36    6.41
   5  -8 -11   77.59    5.26
   5  -8 -12  110.76    6.33
   5  -8 -13   75.03    5.19
   5  -8 -14   78.33    5.23
   5  -8 -15  149.52    7.17
   5  -8 -16  100.24    5.71
   5  -8 -17   67.51    4.53
   5  -8 -18   32.80    3.03
   5  -8 -19   18.61    2.24
   5  -8 -20   89.31    4.44
   5  -8 -21   17.16    1.86
   5  -8 -22   48.47    2.76
  -5  -9 -21   -0.17    0.63
  -5  -9 -20   46.25    3.79
  -5  -9 -19   65.91    5.05
  -5  -9 -18   93.16    6.58
  -5  -9 -17   35.49    4.39
  -5  -9 -16   23.10    3.76
  -5  -9 -15   29.92    4.50
  -5  -9 -14  152.07   10.25
  -5  -9 -13   56.95    6.31
  -5  -9 -12  131.44    8.70
  -5  -9 -12  120.77    9.38
  -5  -9 -11  121.46    8.54
  -5  -9 -10  275.14   12.16
  -5  -9 -10  280.80   12.93
  -5  -9  -9  143.27    8.57
  -5  -9  -9  129.34    8.83
  -5  -9  -8  336.73   14.31
  -5  -9  -7  178.18   10.01
  -5  -9  -6   35.09    4.43
  -5  -9  -5  422.20   15.60
  -5  -9  -4  129.61    8.46
  -5   9   4  132.77    7.25
   5  -9   4  132.74    7.49
  -5  -9  -3   66.11    6.09
  -5   9   3   64.12    5.02
   5  -9   3   58.54    5.31
  -5  -9  -2  325.03   13.65
  -5   9   2  303.06   10.94
   5  -9   2  323.54   12.77
  -5  -9  -1    4.74    2.15
   5  -9   1    5.08    2.09
   5  -9   0  381.21   14.38
   5  -9  -1    7.74    2.32
   5  -9  -2  319.98   13.47
   5  -9  -3   63.81    6.05
   5  -9  -4  144.16    9.02
   5  -9  -5  421.88   15.91
   5  -9  -6   31.96    4.37
   5  -9  -7  194.28   10.97
   5  -9  -7  225.65    8.55
   5  -9  -8  338.50   14.72
   5  -9  -8  368.13   11.48
   5  -9  -9  130.80    9.13
   5  -9  -9  123.14    6.57
   5  -9 -10  243.86   12.49
   5  -9 -10  249.89    9.59
   5  -9 -11  123.55    6.64
   5  -9 -12  130.74    6.85
   5  -9 -13   62.92    4.67
   5  -9 -14  167.77    7.61
   5  -9 -15   33.56    3.28
   5  -9 -16   24.83    2.81
   5  -9 -17   35.31    3.21
   5  -9 -18   90.47    4.90
   5  -9 -19   65.26    3.90
   5  -9 -20   45.44    3.06
   5  -9 -21    0.28    0.53
  -5 -10 -20   49.86    3.61
  -5 -10 -19   49.08    4.05
  -5 -10 -18    6.60    1.82
  -5 -10 -17   27.12    3.60
  -5 -10 -16   20.32    3.48
  -5  10  16   26.05    2.65
  -5 -10 -15   12.15    2.95
  -5 -10 -14   12.03    2.80
  -5 -10 -13    4.83    2.29
  -5 -10 -12   64.72    6.85
  -5 -10 -12   76.30    6.56
  -5 -10 -11   31.88    4.37
  -5 -10 -10  131.78    8.89
  -5 -10  -9   66.20    5.95
  -5 -10  -9   62.19    6.21
  -5 -10  -8  300.75   12.80
  -5 -10  -8  273.88   12.97
  -5 -10  -7   68.85    6.18
  -5 -10  -7   57.01    5.73
  -5 -10  -6  128.81    8.62
  -5 -10  -5    6.14    2.15
  -5 -10  -4  255.06   12.27
  -5 -10  -3   28.87    4.19
   5 -10   3   27.52    3.82
  -5 -10  -2  187.05   10.51
   5 -10   2  178.39    9.80
  -5 -10  -1    4.09    1.92
   5 -10   1   -0.06    1.46
  -5 -10   0    6.39    2.20
   5 -10   0    2.76    1.70
  -5 -10   1    2.44    1.46
   5 -10  -1    2.11    1.36
  -5 -10   2  178.24   10.43
   5 -10  -2  172.96   10.28
  -5 -10   3   23.03    3.90
   5 -10  -3   25.23    3.86
  -5 -10   4  242.14   12.44
   5 -10  -4  272.91   12.98
  -5 -10   5    6.64    2.28
   5 -10  -5    8.36    2.68
   5 -10  -6  130.66    9.19
   5 -10  -7   56.16    6.19
   5 -10  -8  260.41   13.29
   5 -10  -8  297.94   10.06
   5 -10  -9   64.06    6.56
   5 -10  -9   63.33    4.62
   5 -10 -10  132.34    6.78
   5 -10 -11   32.88    3.38
   5 -10 -12   72.53    5.04
   5 -10 -13    4.42    1.41
   5 -10 -14   11.96    2.09
   5 -10 -15   12.33    1.98
   5 -10 -16   21.38    2.50
   5 -10 -17   28.59    2.79
   5 -10 -18   11.75    1.81
   5 -10 -19   49.13    3.29
   5 -10 -20   47.81    3.07
   5 -10 -21    3.58    0.83
  -5 -11 -19   28.10    2.82
  -5 -11 -18    6.14    1.47
  -5 -11 -17   20.76    2.99
  -5 -11 -16    6.77    1.90
  -5  11  16   12.43    1.84
  -5 -11 -15   21.65    3.57
  -5  11  15   29.65    2.96
  -5 -11 -14    5.32    1.98
  -5 -11 -13   37.48    5.07
  -5 -11 -12  144.19    8.98
  -5 -11 -12  125.69    9.43
  -5 -11 -11  119.99    8.35
  -5 -11 -10  130.27    8.93
  -5 -11  -9  111.98    8.25
  -5 -11  -8  127.34    8.70
  -5 -11  -7  361.74   14.47
  -5 -11  -7  318.24   13.83
  -5 -11  -6  448.72   16.69
  -5 -11  -6  522.71   17.51
  -5 -11  -5   19.95    3.68
  -5 -11  -5   28.35    4.17
  -5 -11  -4  320.11   13.98
  -5 -11  -3   40.03    4.92
  -5 -11  -2  200.78   11.08
   5 -11   2  194.49   10.54
  -5 -11  -1  128.45    8.91
   5 -11   1  125.13    8.65
  -5 -11   0  184.58   10.85
   5 -11   0  185.39   10.68
  -5 -11   1  113.51    8.49
   5 -11  -1  122.81    8.81
  -5 -11   2  198.64   11.38
   5 -11  -2  201.61   11.55
  -5 -11   3   35.26    4.73
   5 -11  -3   35.26    5.00
  -5 -11   4  287.98   13.88
   5 -11  -4  314.58   14.61
  -5 -11   5   20.39    3.93
   5 -11  -5   23.68    4.15
   5 -11  -6  448.26   17.94
   5 -11  -7  314.55   14.90
   5 -11  -9  138.34    6.75
   5 -11 -10  137.34    6.86
   5 -11 -11  122.25    6.45
   5 -11 -12  143.76    7.00
   5 -11 -13   41.90    3.70
   5 -11 -14    1.26    1.17
   5 -11 -15   21.69    2.60
   5 -11 -16   10.49    1.83
   5 -11 -17   26.01    2.61
   5 -11 -18    8.14    1.49
   5 -11 -19   29.32    2.46
   5 -11 -20    4.35    0.98
  -5 -12 -18    7.17    1.51
  -5 -12 -17   39.03    3.84
  -5  12  16   41.91    3.10
  -5 -12 -16   34.98    3.93
  -5  12  15  116.68    5.63
  -5 -12 -15  106.76    7.36
  -5  12  14   56.82    4.15
  -5 -12 -14   43.42    5.09
  -5 -12 -13   17.76    3.38
  -5 -12 -12   29.37    4.62
  -5 -12 -12   38.51    4.57
  -5 -12 -11  265.70   12.28
  -5 -12 -10   16.26    3.20
  -5 -12  -9   39.10    4.90
  -5 -12  -8   67.57    6.39
  -5 -12  -7  218.58   11.41
  -5 -12  -6   55.33    5.78
  -5 -12  -5  129.59    8.84
  -5 -12  -4  132.03    8.99
  -5 -12  -4  147.66    9.33
  -5 -12  -3  291.54   13.67
  -5 -12  -3  360.86   14.69
  -5 -12  -2    2.84    1.78
  -5 -12  -2    8.94    2.49
  -5 -12  -1  240.08   12.43
  -5 -12  -1  277.39   12.89
   5 -12   1  247.56   12.56
  -5 -12   0  235.57   12.48
   5 -12   0  230.50   12.34
  -5 -12   1  231.70   12.28
   5 -12  -1  245.83   13.00
  -5 -12   2    4.18    2.01
  -5 -12   2    3.21    2.10
   5 -12  -2   -2.46    2.79
  -5 -12   3  272.15   13.49
   5 -12  -3  304.26   14.73
  -5 -12   4  119.48    8.71
   5 -12  -4  138.56    9.85
  -5 -12   5  104.36    8.12
   5 -12 -10   17.24    2.46
   5 -12 -11  271.46    9.74
   5 -12 -12   35.81    3.41
   5 -12 -13   24.24    2.83
   5 -12 -14   51.75    3.90
   5 -12 -15  108.84    5.52
   5 -12 -16   35.99    3.10
   5 -12 -17   33.41    2.82
   5 -12 -18    7.71    1.40
   5 -12 -19   10.80    1.43
  -5 -13 -17   17.51    2.32
  -5  13  16   85.51    4.17
  -5 -13 -16   85.85    5.65
  -5 -13 -15    8.55    2.15
  -5  13  15    9.87    1.65
  -5  13  14   55.68    3.91
  -5 -13 -14   41.51    4.62
  -5 -13 -13    5.52    2.12
  -5  13  13    6.60    1.58
  -5  13  12   38.56    3.50
  -5 -13 -12   32.93    4.58
  -5 -13 -12   33.78    4.02
  -5 -13 -11  265.63   11.90
  -5 -13 -10    9.95    2.53
  -5 -13  -9   11.89    2.66
  -5 -13  -8    4.83    1.93
  -5 -13  -7   90.34    7.21
  -5 -13  -6   22.25    3.74
  -5 -13  -5   70.33    6.64
  -5 -13  -4  224.77   11.84
  -5 -13  -3   69.57    6.61
  -5 -13  -2  128.38    8.99
  -5 -13  -1  161.77   10.23
  -5 -13   0   85.76    7.45
  -5 -13   1  157.29   10.19
  -5 -13   2  123.97    9.12
  -5 -13   3   66.02    6.63
  -5 -13   4  188.22   11.21
  -5 -13   5   58.06    6.18
  -5 -13   6   21.93    3.90
   5 -13 -11  299.37   10.13
   5 -13 -12   37.55    3.45
   5 -13 -13    6.42    1.52
   5 -13 -14   51.19    3.80
   5 -13 -15    9.14    1.56
   5 -13 -16   83.60    4.45
   5 -13 -17   19.09    2.04
   5 -13 -18   17.07    1.77
  -5 -14 -16   60.53    4.21
  -5  14  15   30.19    2.56
  -5 -14 -15   26.62    3.12
  -5 -14 -14    8.70    2.10
  -5  14  14    7.45    1.54
  -5  14  13   44.37    3.48
  -5 -14 -13   29.76    3.98
  -5 -14 -12   12.81    2.32
  -5 -14 -12   12.11    2.64
  -5  14  12   14.19    2.16
  -5 -14 -11   11.26    2.38
  -5  14  11   11.37    2.00
  -5  14  10   89.37    5.37
  -5 -14 -10   81.13    6.38
  -5 -14  -9    9.28    2.36
  -5 -14  -8   66.46    6.13
  -5 -14  -7   23.26    3.70
  -5 -14  -6   10.19    2.50
  -5 -14  -5   19.70    3.46
  -5 -14  -4   22.47    3.74
  -5 -14  -3   95.76    7.74
  -5 -14  -2  213.74   11.69
  -5 -14  -1   51.32    5.84
  -5 -14   0   72.79    6.81
  -5 -14   1   50.42    5.81
  -5  14  -1   53.68    4.01
  -5 -14   2  202.03   11.61
  -5 -14   3   89.11    7.57
  -5 -14   4   15.59    3.24
  -5 -14   5   14.53    2.98
  -5 -14   6    9.69    2.71
   5 -14 -12   11.09    1.93
   5 -14 -13   40.28    3.37
   5 -14 -14    9.22    1.69
   5 -14 -15   31.52    2.76
   5 -14 -16   54.40    3.35
  -5 -15 -15   15.83    2.13
  -5  15  15   16.41    1.69
  -5 -15 -14   19.05    2.61
  -5  15  14   23.97    2.29
  -5  15  13  159.75    6.24
  -5 -15 -13  121.65    7.16
  -5 -15 -12    3.58    1.60
  -5  15  12    4.88    1.39
  -5  15  11  145.36    6.43
  -5 -15 -11  135.83    7.48
  -5  15  10   39.09    3.47
  -5 -15 -10   33.38    3.91
  -5 -15  -9    7.78    2.03
  -5  15   9    9.69    1.91
  -5  15   8   39.74    3.62
  -5 -15  -8   30.90    4.12
  -5  15   7  128.19    6.50
  -5 -15  -7  114.55    7.91
  -5  15   6   56.44    4.39
  -5 -15  -6   44.06    4.95
  -5 -15  -5    6.59    2.36
  -5  15   5    6.45    1.63
  -5  15   4   39.66    3.68
  -5 -15  -4   38.00    4.79
  -5 -15  -3   62.64    6.13
  -5  15   3   79.74    5.18
  -5 -15  -2   36.61    4.75
  -5  15   2   43.23    3.78
  -5 -15  -1   15.25    3.27
  -5  15   1   18.81    2.54
  -5 -15   0   26.73    4.21
  -5  15   0   26.19    2.92
  -5 -15   1   15.69    3.28
  -5  15  -1   16.33    2.21
  -5 -15   2   35.50    4.74
  -5 -15   3   55.34    5.92
  -5 -15   4   28.52    4.22
  -5 -15   5    1.07    1.56
  -5 -15   6   38.60    4.72
  -5  16  14   36.10    2.48
  -5  16  13  110.90    4.72
  -5 -16 -13   72.67    4.78
  -5 -16 -12    6.09    1.79
  -5  16  12    8.04    1.49
  -5 -16 -11    8.53    1.91
  -5 -16 -11    5.17    1.64
  -5  16  11    9.38    1.64
  -5  16  10  112.17    5.51
  -5 -16 -10   98.75    6.24
  -5  16   9   49.27    3.73
  -5 -16  -9   40.20    4.18
  -5  16   8   96.40    5.32
  -5 -16  -8   86.85    6.40
  -5 -16  -7    3.38    1.67
  -5  16   7    4.96    1.45
  -5 -16  -6    0.95    1.18
  -5  16   6    2.53    1.38
  -5 -16  -5   22.37    3.58
  -5  16   5   25.06    2.84
  -5 -16  -4  132.59    8.55
  -5  16   4  154.87    7.06
  -5 -16  -3   10.52    2.80
  -5  16   3   11.82    2.17
  -5 -16  -2   52.86    5.55
  -5  16   2   50.71    3.99
  -5 -16  -1    6.88    2.35
  -5  16   1    5.42    1.34
  -5 -16   0    0.82    1.29
  -5  16   0    0.46    0.98
  -5 -16   1    5.65    2.04
  -5 -16   2   46.19    5.22
  -5 -16   3    3.88    1.76
  -5 -16   4  117.83    8.00
  -5 -16   5   16.35    3.18
  -5 -16   6    2.07    1.11
  -5  17  12   85.73    4.06
  -5 -17 -11    5.28    1.53
  -5  17  11   12.98    1.77
  -5 -17 -10    4.33    1.35
  -5 -17 -10    2.64    1.23
  -5  17  10    6.38    1.41
  -5  17   9   56.66    3.79
  -5 -17  -9   52.05    4.31
  -5  17   8   36.85    3.13
  -5 -17  -8   34.46    3.75
  -5 -17  -7    7.32    2.00
  -5  17   7   10.50    1.91
  -5 -17  -6   10.38    2.35
  -5  17   6   14.47    2.31
  -5 -17  -5    8.61    2.34
  -5  17   5    8.56    1.77
  -5 -17  -4   12.71    2.66
  -5  17   4   18.36    2.36
  -5 -17  -3   10.57    2.61
  -5  17   3    9.59    1.77
  -5 -17  -2   77.97    6.29
  -5  17   2   88.54    5.03
  -5 -17  -1   37.51    4.45
  -5  17   1   32.81    3.01
  -5 -17   0    4.37    1.77
  -5  17   0    3.11    1.00
  -5 -17   1   31.51    4.04
  -5 -17   2   79.72    6.29
  -5 -17   3    6.60    2.14
  -5 -17   4    9.44    2.26
  -5 -17   5   12.87    2.49
  -5 -17   6    9.86    2.16
  -5  18  11   10.72    1.40
  -5  18  10   64.59    3.49
  -5  18   9   29.49    2.46
  -5 -18  -9   26.52    2.68
  -5 -18  -8    7.47    1.70
  -5  18   8   12.52    1.79
  -5  18   7   24.91    2.46
  -5 -18  -7   22.21    2.87
  -5 -18  -6    2.41    1.19
  -5  18   6    2.91    1.09
  -5 -18  -5    6.40    1.85
  -5  18   5    6.88    1.44
  -5 -18  -4    6.58    1.94
  -5  18   4    6.63    1.41
  -5 -18  -3    5.76    1.95
  -5  18   3    3.90    1.26
  -5 -18  -2    6.24    1.93
  -5  18   2    5.29    1.27
  -5  18   1   24.51    2.40
  -5 -18  -1   22.67    3.26
  -5 -18   0  205.39    9.45
  -5 -18   1   27.33    3.48
  -5 -18   2    6.30    1.79
  -5 -18   3    3.56    1.42
  -5 -18   4    5.22    1.60
  -5 -18   5    5.18    1.47
  -5  19   8    3.98    1.01
  -5 -19  -7   11.68    1.87
  -5  19   7   15.00    1.74
  -5  19   6   16.53    1.87
  -5 -19  -6   18.36    2.34
  -5  19   5   23.55    2.23
  -5 -19  -5   21.92    2.63
  -5 -19  -4   14.86    2.33
  -5  19   4   19.18    2.00
  -5 -19  -3    0.70    0.85
  -5  19   3   -0.25    0.64
  -5 -19  -2    7.31    1.74
  -5  19   2    7.34    1.33
  -5 -19  -1   20.37    2.77
  -5 -19   0   17.57    2.54
  -5 -19   1   17.54    2.50
  -5 -19   2    6.03    1.55
  -5 -19   3    0.54    0.96
  -5 -19   4   13.52    2.03
  -5 -19   5   17.70    2.11
  -5 -20  -4   28.98    2.64
  -5 -20  -3   13.83    1.94
  -5 -20  -2  110.91    5.43
  -5 -20  -1    6.96    1.53
  -5 -20   0   49.48    3.62
  -5 -20   1    5.88    1.37
  -5 -20   2   96.20    4.72
   6   0   0   51.86    4.02
   6   0  -1   98.89    5.54
   6   0   1   94.64    5.42
   6   0  -2 1718.29   29.29
   6   0   2 1722.19   29.09
   6   0  -3  222.34    8.65
   6   0  -4  892.47   19.17
   6   0  -5   51.03    4.20
   6   0  -6 1505.90   27.40
   6   0  -7   23.89    2.98
   6   0  -8   89.79    5.65
   6   0  -9   91.96    5.82
  -6   0  -9   81.06    6.52
   6   0 -10  135.40    7.13
  -6   0 -10  146.46    8.66
   6   0 -11  415.60   13.60
  -6   0 -11  423.48   15.12
  -6   0  12   54.13    5.18
  -6   0 -12   54.57    5.18
  -6   0 -13  113.30    7.42
   6   0 -14    7.39    1.95
   6   0 -15   37.09    3.96
   6   0 -16  433.49   13.74
  -6   0 -16  423.64   14.98
   6   0 -17   25.69    3.16
  -6   0 -17   26.56    3.71
   6   0 -18   40.74    3.72
  -6   0 -18   36.98    4.09
  -6   0 -19   30.20    3.51
   6   0 -19   31.15    3.02
  -6   0 -20   48.71    4.28
   6   0 -20   45.77    3.26
   6   0 -21    3.50    0.85
  -6   0 -21    2.96    1.34
  -6  -1 -21   27.06    2.94
   6   1 -21   24.18    2.03
  -6  -1 -20   15.15    2.53
   6   1 -20   15.39    1.91
  -6  -1 -19   12.14    2.30
   6   1 -19   18.06    2.30
   6   1 -18   43.21    3.81
  -6  -1 -18   44.27    4.58
  -6  -1 -17   14.96    2.89
   6   1 -17   16.44    2.59
  -6  -1 -16   24.85    3.62
   6   1 -16   28.05    3.49
   6   1 -15   29.38    3.59
   6   1 -14   66.66    5.29
  -6  -1 -13  245.85   11.16
  -6  -1 -12    6.65    2.03
   6   1 -12    8.86    2.50
  -6   1  12    7.75    2.17
  -6   1  11 1081.52   25.37
  -6  -1 -11 1078.56   26.10
  -6  -1 -10   18.14    3.30
   6   1  -9  285.52   10.11
  -6  -1  -9  301.20   12.69
   6   1  -8   78.82    5.17
   6   1  -7   10.02    1.93
   6   1  -6  182.75    7.81
   6   1  -5    8.10    1.66
   6  -1   4  247.95    9.11
   6   1  -4  230.43    8.72
   6   1  -3  100.97    5.59
   6  -1   3   98.65    5.69
   6  -1   2  111.51    6.05
   6   1  -2  104.91    5.73
   6  -1   1  677.23   16.03
   6   1  -1  636.79   15.29
   6   1   0    5.57    1.65
   6  -1   0    6.21    1.56
   6  -1  -1  671.30   16.06
   6  -1  -2  109.05    6.00
   6  -1  -3   85.94    5.37
   6  -1  -4  226.09    8.90
   6  -1  -5    8.61    1.77
   6  -1  -6  180.04    8.10
   6  -1  -7    8.34    1.77
   6  -1  -8   75.70    5.29
  -6   1  -9  301.84   12.57
   6  -1  -9  292.41   10.88
  -6   1 -10   18.76    3.23
   6  -1 -10   17.23    2.62
  -6   1 -11 1056.39   25.31
  -6   1 -12    6.11    2.05
   6  -1 -13  245.97   10.27
  -6   1 -13  243.22   10.94
   6  -1 -14   63.13    5.13
   6  -1 -15   24.96    3.27
   6  -1 -16   26.34    3.29
   6  -1 -17   15.49    2.52
  -6   1 -17   16.04    3.07
  -6   1 -18   47.50    4.67
   6  -1 -18   43.29    3.84
   6  -1 -19   14.50    2.14
  -6   1 -19   14.09    2.58
  -6   1 -20   15.34    2.56
   6  -1 -20   15.60    1.95
   6  -1 -21   28.88    2.34
   6  -1 -22   34.04    2.18
  -6  -2 -21   54.53    3.96
   6   2 -20    2.34    0.81
  -6  -2 -20    0.95    1.03
  -6  -2 -19   54.80    4.75
   6   2 -19   49.41    3.64
   6   2 -18   94.90    5.53
  -6  -2 -18   98.35    6.59
  -6  -2 -17    0.30    1.20
   6   2 -17   -0.44    0.87
  -6  -2 -16    7.86    2.10
   6   2 -16   10.61    2.20
   6   2 -15  256.87   10.54
   6   2 -13   40.47    4.39
  -6   2  13   49.67    4.87
  -6  -2 -13   51.85    5.20
   6   2 -12  157.40    8.68
  -6   2  12  174.88    9.26
  -6  -2 -12  177.43    9.60
  -6  -2 -11   23.26    3.66
  -6   2  11   25.16    3.55
  -6   2  10   34.60    4.15
  -6  -2 -10   33.56    4.29
  -6  -2  -9  151.19    8.90
  -6  -2  -8   50.85    5.15
   6   2  -6   39.91    3.56
   6  -2   5  297.09   10.26
   6   2  -5  274.34    9.65
   6  -2   4  247.78    9.38
   6   2  -4  247.45    8.97
   6  -2   3  255.62    9.46
   6  -2   2  455.95   13.06
   6  -2   1  603.36   15.44
   6  -2   0  227.85    8.91
   6  -2  -1  611.85   15.59
   6  -2  -2  452.94   13.27
   6  -2  -3  252.61    9.68
   6  -2  -4  247.81    9.65
   6  -2  -5  286.47   10.59
   6  -2  -6   40.53    3.98
   6  -2  -7   52.14    4.62
   6  -2  -8   56.18    4.83
  -6   2  -8   46.64    4.87
   6  -2  -9  160.70    8.22
  -6   2  -9  160.32    9.10
   6  -2 -10   37.86    4.09
  -6   2 -10   37.97    4.39
  -6   2 -11   16.74    3.03
   6  -2 -12  165.54    8.28
  -6   2 -12  174.78    9.39
   6  -2 -13   43.56    4.26
   6  -2 -14    9.84    2.09
   6  -2 -15  266.47   10.69
   6  -2 -16   10.36    2.14
   6  -2 -17    1.02    1.11
  -6   2 -17    2.42    1.73
  -6   2 -18   97.34    6.65
   6  -2 -18   97.92    5.70
  -6   2 -19   49.08    4.48
   6  -2 -19   54.34    3.94
   6  -2 -20    2.59    0.98
   6  -2 -21   58.97    3.38
   6  -2 -22   16.35    1.55
  -6  -3 -21   52.74    3.81
  -6  -3 -20  223.08    8.79
  -6  -3 -19    4.19    1.40
   6   3 -19    5.20    1.31
   6   3 -18  128.93    6.30
  -6  -3 -18  134.88    7.71
  -6  -3 -17   10.44    2.38
   6   3 -17    9.75    1.94
  -6  -3 -16   27.76    3.82
   6   3 -16   31.13    3.42
   6   3 -15   25.78    3.30
  -6  -3 -15   29.20    4.13
  -6  -3 -13    7.68    2.28
  -6   3  13   13.14    2.79
   6   3 -12   26.84    3.61
  -6   3  12   26.00    3.64
  -6  -3 -12   28.51    4.01
  -6   3  11  230.15   10.70
  -6  -3 -11  223.97   11.10
  -6   3  10   24.16    3.51
  -6  -3 -10   25.50    3.92
  -6   3   9  160.13    8.75
  -6  -3  -9  164.69    9.41
  -6   3   8  249.15   10.80
  -6  -3  -8  266.56   12.11
   6  -3   5  324.05   10.93
   6  -3   4   74.84    5.16
   6  -3   3  127.44    6.68
   6  -3   2  444.91   13.15
   6  -3   1  136.91    7.08
   6  -3   0  396.71   12.49
   6  -3  -1  138.94    7.14
   6  -3  -2  446.24   13.55
   6  -3  -3  126.58    6.99
   6  -3  -4   68.94    5.18
   6  -3  -5  317.75   11.62
   6  -3  -6   55.62    4.80
   6  -3  -7  353.50   12.64
   6  -3  -8  268.49   11.06
  -6   3  -8  283.47   12.21
   6  -3  -9  156.95    8.44
  -6   3  -9  167.29    9.39
   6  -3 -10   22.14    3.15
  -6   3 -10   29.58    3.90
   6  -3 -11  206.27    9.22
   6  -3 -11  208.19    9.82
   6  -3 -12   30.07    3.48
   6  -3 -13    7.97    1.92
   6  -3 -14  148.71    7.85
   6  -3 -15   28.80    3.45
   6  -3 -16   28.38    3.35
   6  -3 -17   10.51    2.06
  -6   3 -17    9.65    2.36
  -6   3 -18  142.30    7.88
   6  -3 -18  140.72    6.80
   6  -3 -19    4.65    1.44
   6  -3 -20  209.75    7.24
   6  -3 -21   54.27    3.23
   6  -3 -22    4.97    0.98
  -6  -4 -21    3.97    1.29
  -6  -4 -20   14.83    2.25
  -6  -4 -19   78.89    5.52
   6   4 -19   75.38    4.03
  -6  -4 -18    9.84    2.14
   6   4 -18   11.26    1.87
  -6  -4 -17   17.78    3.10
   6   4 -17   22.05    2.71
  -6  -4 -16   18.81    3.24
   6   4 -16   15.24    2.31
   6   4 -15   63.00    4.94
  -6  -4 -15   72.76    6.22
  -6   4  14    2.78    1.81
  -6   4  13  189.44    9.54
  -6  -4 -13  196.85   10.16
  -6   4  12  613.91   18.14
  -6  -4 -12  654.28   19.60
  -6   4  11  214.61   10.29
  -6  -4 -11  212.70   11.07
  -6   4  10   90.86    6.53
  -6  -4 -10   86.81    7.09
  -6   4   9  164.40    8.88
  -6  -4  -9  157.65    9.60
  -6   4   8   88.04    6.36
  -6  -4  -8   85.88    6.86
  -6   4   7   96.76    6.59
  -6  -4  -7   97.88    7.30
   6  -4   6   78.46    5.12
   6  -4   5  262.43    9.75
   6  -4   4  180.68    8.14
   6  -4   3  172.97    8.15
   6  -4   2  312.37   11.27
   6  -4   1  112.51    6.69
   6  -4   0  395.66   12.98
   6  -4  -1  121.86    6.98
   6  -4  -2  307.08   11.33
   6  -4  -3  180.52    8.62
   6  -4  -4  172.21    8.53
   6  -4  -5  251.39   10.56
   6  -4  -6   77.74    5.91
   6  -4  -7  108.69    7.03
  -6   4  -7  102.44    7.35
   6  -4  -8   99.69    6.92
  -6   4  -8   90.06    6.90
   6  -4  -9  161.80    7.76
   6  -4  -9  178.14    9.35
   6  -4 -10   87.89    5.81
   6  -4 -10   90.28    6.70
   6  -4 -11  215.47    9.31
   6  -4 -11  203.62   10.19
   6  -4 -12  603.44   16.58
   6  -4 -13  181.83    8.64
   6  -4 -14    4.26    1.70
   6  -4 -15   70.92    5.27
   6  -4 -16   19.15    2.67
   6  -4 -17   22.16    2.85
   6  -4 -18   13.04    2.10
   6  -4 -19   81.51    4.70
   6  -4 -20   17.85    2.07
   6  -4 -21    3.41    0.96
   6  -4 -22   68.54    3.16
  -6  -5 -21   74.45    4.16
  -6  -5 -20   26.84    2.90
  -6  -5 -19    5.03    1.46
  -6  -5 -18  111.54    6.87
   6   5 -17  126.50    6.20
  -6  -5 -17  120.65    7.57
   6   5 -16   43.28    3.86
  -6  -5 -16   42.97    4.77
  -6  -5 -15   67.30    5.99
  -6  -5 -14   56.75    5.63
  -6  -5 -13    4.90    1.67
  -6   5  13    6.75    2.06
  -6   5  12  308.81   12.46
  -6  -5 -12  324.01   13.59
  -6   5  11  114.14    7.46
  -6  -5 -11  116.01    8.19
  -6   5  10  164.22    9.01
  -6  -5 -10  183.60   10.25
  -6   5   9   77.19    6.04
  -6  -5  -9   87.78    7.02
  -6   5   8   55.33    5.06
  -6  -5  -8   56.63    5.70
  -6   5   7   55.79    5.02
  -6  -5  -7   47.94    5.28
  -6  -5  -6    5.10    1.81
  -6   5   6    3.88    1.42
   6  -5   6    4.95    1.79
   6  -5   5  110.92    6.37
   6  -5   4   80.66    5.58
   6  -5   3   89.08    5.94
   6  -5   2   66.70    5.20
   6  -5   1    9.89    2.17
   6  -5   0  413.90   13.76
   6  -5  -1    9.11    2.07
   6  -5  -2   70.39    5.48
   6  -5  -3   81.71    5.97
   6  -5  -4   86.84    6.31
   6  -5  -5  115.32    7.33
   6  -5  -6    4.00    1.60
   6  -5  -7   54.18    4.31
   6  -5  -7   55.39    5.25
   6  -5  -8   55.28    4.49
   6  -5  -8   56.00    5.38
   6  -5  -9   76.16    5.37
   6  -5  -9   80.85    6.52
   6  -5 -10  171.83    8.16
   6  -5 -10  174.42    9.73
   6  -5 -11  109.61    6.56
   6  -5 -11  107.99    7.78
   6  -5 -12  302.50   11.24
   6  -5 -13    6.14    1.72
   6  -5 -14   58.81    4.81
   6  -5 -15   63.45    4.96
   6  -5 -16   47.41    4.14
   6  -5 -17  130.87    6.57
   6  -5 -18  118.71    5.95
   6  -5 -19    5.57    1.27
   6  -5 -20   31.27    2.62
   6  -5 -21   80.05    3.85
   6  -5 -22   39.03    2.34
  -6  -6 -20   12.78    1.97
  -6  -6 -19    0.41    0.90
  -6  -6 -18  110.81    6.66
  -6  -6 -17   15.27    2.66
   6   6 -16   62.33    4.37
  -6  -6 -16   56.95    5.32
  -6  -6 -15   71.21    6.28
  -6  -6 -14  151.58    9.09
  -6  -6 -13  166.16    9.45
  -6   6  12  198.33    9.97
  -6  -6 -12  194.17   10.63
  -6   6  11   64.09    5.61
  -6  -6 -11   70.58    6.43
  -6   6  10  117.62    7.53
  -6  -6 -10  126.32    8.77
  -6   6   9   54.22    5.09
  -6  -6  -9   55.36    5.82
  -6   6   8  351.26   13.08
  -6  -6  -8  379.79   15.04
  -6   6   7  101.70    6.79
  -6  -6  -7  108.68    7.96
  -6   6   6  172.37    8.78
  -6  -6  -6  176.80   10.10
  -6  -6  -5    5.04    2.08
  -6   6   5    4.97    1.55
   6  -6   5    4.73    1.68
   6  -6   4  605.61   16.52
  -6  -6  -4  570.63   18.56
   6  -6   3  171.42    8.67
   6  -6   2  134.29    7.84
   6  -6   1   52.31    4.80
   6  -6   0  114.55    7.30
   6  -6  -1   48.52    4.80
   6  -6  -2  139.60    8.12
   6  -6  -3  183.50    9.49
   6  -6  -4  578.74   17.62
   6  -6  -5    2.57    1.74
   6  -6  -6  171.46    9.39
   6  -6  -7  110.25    6.28
   6  -6  -7  117.11    7.92
   6  -6  -8  357.29   11.85
   6  -6  -8  367.07   14.35
   6  -6  -9   52.79    4.48
   6  -6  -9   53.62    5.66
   6  -6 -10  124.04    6.90
   6  -6 -10  129.68    8.60
   6  -6 -11   65.88    5.05
   6  -6 -11   67.51    6.25
   6  -6 -12  176.35    8.26
   6  -6 -13  148.13    7.62
   6  -6 -14  143.58    7.34
   6  -6 -15   74.90    5.18
   6  -6 -16   66.12    4.70
   6  -6 -17   16.95    2.28
   6  -6 -18  118.71    5.78
   6  -6 -19    0.88    0.73
   6  -6 -20   14.60    1.85
   6  -6 -21   30.49    2.30
  -6  -7 -20   29.43    2.73
  -6  -7 -19   66.67    4.55
  -6  -7 -18   29.91    3.37
  -6  -7 -17    6.56    1.71
  -6  -7 -16   17.43    3.00
  -6  -7 -15   57.25    5.53
  -6  -7 -14   62.23    5.83
  -6  -7 -13    4.91    2.12
  -6  -7 -13    3.93    2.01
  -6  -7 -12  207.19   11.06
  -6  -7 -11  141.43    9.17
  -6   7  10   48.37    4.86
  -6  -7 -10   49.78    5.44
  -6   7   9   56.97    5.24
  -6  -7  -9   62.74    6.16
  -6   7   8  126.14    7.69
  -6  -7  -8  135.45    9.06
  -6  -7  -7    3.91    1.92
  -6   7   7    5.60    1.83
  -6   7   6  235.89   10.41
  -6  -7  -6  248.51   12.17
  -6  -7  -5   19.95    3.65
  -6   7   5   18.63    2.94
  -6   7   4   35.28    3.93
   6  -7   4   36.38    4.02
  -6  -7  -4   36.97    4.75
  -6   7   3   20.49    2.95
   6  -7   3   22.24    3.25
  -6  -7  -3   24.40    3.88
  -6   7   2  286.01   11.17
   6  -7   2  311.18   12.39
  -6  -7  -2  299.79   13.38
   6  -7   1  240.65   10.92
  -6  -7  -1  236.31   11.90
   6  -7   0   56.54    5.27
   6  -7  -1  250.73   11.43
   6  -7  -2  302.03   12.67
   6  -7  -3   16.56    3.06
   6  -7  -4   33.38    4.26
   6  -7  -5   20.04    3.45
   6  -7  -6  256.99   12.05
   6  -7  -7    7.21    1.80
   6  -7  -7    3.96    1.73
   6  -7  -8  125.71    6.82
   6  -7  -8  137.92    8.94
   6  -7  -9   63.75    4.90
   6  -7  -9   59.37    6.03
   6  -7 -10   52.67    4.47
   6  -7 -10   46.69    5.23
   6  -7 -11  130.25    7.07
   6  -7 -12  200.15    8.79
   6  -7 -13    3.89    1.55
   6  -7 -14   60.13    4.64
   6  -7 -15   63.56    4.62
   6  -7 -16   20.74    2.64
   6  -7 -17   10.48    1.87
   6  -7 -18   35.71    3.05
   6  -7 -19   72.24    4.05
   6  -7 -20   26.45    2.30
   6  -7 -21    9.08    1.28
  -6  -8 -19   23.22    2.63
  -6  -8 -18   -0.16    0.98
  -6  -8 -17    4.57    1.45
  -6  -8 -16    3.37    1.50
  -6  -8 -15   16.03    2.81
  -6  -8 -14   -1.07    1.75
  -6  -8 -13  478.43   17.05
  -6  -8 -13  522.74   17.08
  -6  -8 -12  287.97   12.97
  -6  -8 -11  129.42    8.73
  -6  -8 -10   63.77    6.36
  -6  -8  -9   92.60    7.62
  -6   8   8   72.22    5.89
  -6  -8  -8   74.39    6.75
  -6   8   7  107.89    7.09
  -6  -8  -7  100.48    7.90
  -6   8   6   82.68    6.17
  -6  -8  -6   80.61    7.07
  -6  -8  -5   14.45    3.14
  -6   8   5   12.28    2.55
  -6   8   4  217.06    9.90
   6  -8   4  229.90   10.26
  -6  -8  -4  223.34   11.63
  -6  -8  -3  407.49   15.91
  -6   8   3  404.81   13.70
   6  -8   3  410.36   14.54
  -6   8   2   46.75    4.47
   6  -8   2   47.86    5.12
  -6  -8  -2   41.62    5.08
  -6   8   1   82.98    5.86
   6  -8   1   92.76    6.92
  -6  -8  -1   85.02    7.21
  -6  -8   0   22.88    3.80
  -6   8   0   17.33    2.68
   6  -8   0   19.18    3.35
  -6   8  -1   84.55    5.70
   6  -8  -1   93.65    7.18
  -6  -8   1   86.65    7.28
   6  -8  -2   44.86    5.02
  -6  -8   2   47.61    5.43
   6  -8  -3  428.58   15.86
  -6  -8   3  394.58   15.84
   6  -8  -4  233.88   11.65
  -6  -8   4  205.99   11.24
   6  -8  -5   12.63    2.97
   6  -8  -6   87.73    7.24
   6  -8  -7  120.19    6.46
   6  -8  -7   95.11    7.66
   6  -8  -8   78.51    5.25
   6  -8  -8   64.73    6.41
   6  -8  -9   84.90    7.27
   6  -8  -9   93.90    5.84
   6  -8 -10   62.31    4.80
   6  -8 -11  131.46    6.95
   6  -8 -12  269.53   10.05
   6  -8 -13  462.59   13.37
   6  -8 -14   -0.28    1.02
   6  -8 -15   19.49    2.55
   6  -8 -16    4.84    1.35
   6  -8 -17    4.21    1.17
   6  -8 -18   -0.37    0.70
   6  -8 -19   25.60    2.36
   6  -8 -20   56.82    3.20
   6  -8 -21    5.43    0.92
  -6  -9 -19    2.70    0.95
  -6  -9 -18    4.87    1.32
  -6  -9 -17   17.31    2.54
  -6  -9 -16    0.59    1.20
  -6  -9 -15   32.93    3.95
  -6  -9 -14   50.13    5.09
  -6  -9 -13    8.92    2.34
  -6  -9 -13    5.28    1.83
  -6  -9 -12   75.72    6.71
  -6  -9 -12   71.47    6.42
  -6  -9 -11   22.07    3.74
  -6  -9 -10   53.63    5.80
  -6  -9  -9   25.30    4.10
  -6  -9  -8   60.32    6.23
  -6  -9  -7  124.09    8.77
  -6  -9  -6  136.68    9.14
  -6   9   5   49.85    4.91
  -6  -9  -5   49.91    5.58
  -6   9   4  123.87    7.58
  -6  -9  -4  120.71    8.62
  -6   9   3  217.12    9.97
   6  -9   3  202.68   10.34
  -6  -9  -3  198.40   11.13
  -6   9   2  501.46   15.50
   6  -9   2  505.44   17.13
  -6  -9  -2  510.09   18.26
  -6   9   1  259.84   10.64
   6  -9   1  260.66   12.27
  -6  -9  -1  243.65   12.35
  -6  -9   0   16.07    3.35
  -6   9   0   18.02    2.79
   6  -9   0   18.93    3.72
   6  -9  -1  260.09   12.52
  -6  -9   1  247.65   12.59
   6  -9  -2  521.89   18.18
  -6  -9   2  466.41   17.76
   6  -9  -3  223.90   11.75
  -6  -9   3  190.34   11.05
   6  -9  -4  125.13    8.87
  -6  -9   4  106.63    8.28
   6  -9  -5   46.99    5.52
   6  -9  -6  121.74    8.91
   6  -9  -7  120.70    8.78
   6  -9  -8   70.89    4.96
   6  -9  -9   27.06    3.15
   6  -9 -10   59.92    4.57
   6  -9 -11   26.04    3.13
   6  -9 -12   65.75    4.72
   6  -9 -13   13.26    2.19
   6  -9 -14   50.88    3.95
   6  -9 -15   34.67    3.21
   6  -9 -16    1.43    0.84
   6  -9 -17   20.81    2.27
   6  -9 -18    6.00    1.24
   6  -9 -19    5.72    1.13
   6  -9 -20   13.66    1.57
  -6 -10 -18   18.27    2.23
  -6 -10 -17   18.24    2.45
  -6 -10 -16   10.32    2.11
  -6  10  16   19.00    2.19
  -6 -10 -15   95.70    6.44
  -6 -10 -14   36.90    4.23
  -6 -10 -13  174.74    9.70
  -6 -10 -13  181.86    9.39
  -6 -10 -12   74.84    6.49
  -6 -10 -12   83.16    6.68
  -6 -10 -11   19.84    3.45
  -6 -10 -11   10.78    2.57
  -6 -10 -10   19.77    3.60
  -6 -10  -9   13.65    2.98
  -6 -10  -8   43.90    5.27
  -6 -10  -7  231.69   12.09
  -6 -10  -6  106.71    8.09
  -6 -10  -5  406.51   16.24
  -6 -10  -4   57.71    6.02
  -6 -10  -3  255.24   12.72
   6 -10   2  423.56   15.94
  -6 -10  -2  401.10   16.25
   6 -10   1   41.10    4.87
  -6 -10  -1   44.83    5.43
   6 -10   0   44.35    5.42
  -6 -10   0   37.92    4.92
  -6 -10   1   43.52    5.47
   6 -10  -1   47.86    5.63
   6 -10  -2  436.81   17.08
  -6 -10   2  384.14   16.22
   6 -10  -3  277.73   13.58
  -6 -10   3  245.06   12.68
   6 -10  -4   61.93    6.54
  -6 -10   4   50.95    5.71
   6 -10  -5  415.64   16.98
   6 -10  -9   15.99    2.42
   6 -10 -10   20.40    2.66
   6 -10 -11   21.49    2.78
   6 -10 -12   80.35    5.08
   6 -10 -13  180.64    7.50
   6 -10 -14   40.35    3.42
   6 -10 -15  103.21    5.28
   6 -10 -16   12.13    1.79
   6 -10 -17   20.24    2.15
   6 -10 -18   17.07    1.86
   6 -10 -19    6.85    1.18
  -6 -11 -17    9.28    1.68
  -6  11  16   43.08    3.07
  -6 -11 -16   34.98    3.35
  -6  11  15   38.37    3.22
  -6 -11 -15   32.94    3.60
  -6 -11 -14   65.67    5.42
  -6 -11 -13   36.39    4.21
  -6 -11 -13   46.10    4.52
  -6 -11 -12    2.70    1.33
  -6 -11 -12    1.53    1.28
  -6 -11 -11  185.91   10.33
  -6 -11 -11  179.91   10.05
  -6 -11 -10   21.71    3.64
  -6 -11  -9  181.71   10.48
  -6 -11  -8   57.94    5.95
  -6 -11  -7  154.20    9.76
  -6 -11  -6  702.72   21.76
  -6 -11  -5  365.26   15.28
  -6 -11  -4  156.73    9.91
  -6 -11  -3  234.54   12.21
  -6 -11  -2   98.14    7.91
   6 -11   1  547.05   19.17
  -6 -11  -1  546.80   19.26
  -6 -11   0  314.96   14.47
   6 -11   0  311.17   14.42
  -6 -11   1  523.74   19.06
   6 -11  -1  567.45   20.04
  -6 -11   2   94.26    7.92
   6 -11  -2  105.77    8.64
  -6 -11   3  224.34   12.15
  -6 -11   4  129.54    9.14
  -6 -11   5  319.41   14.33
   6 -11 -10   29.86    3.07
   6 -11 -11  205.12    8.03
   6 -11 -12    3.36    1.09
   6 -11 -13   40.04    3.40
   6 -11 -14   68.60    4.27
   6 -11 -15   30.36    2.77
   6 -11 -16   41.88    3.03
   6 -11 -17    6.82    1.25
   6 -11 -18   15.60    1.73
  -6 -12 -16    7.98    1.61
  -6  12  16    8.32    1.43
  -6  12  15   40.22    3.09
  -6 -12 -15   37.56    3.47
  -6  12  14  129.33    5.89
  -6 -12 -14  102.31    6.30
  -6 -12 -13   77.79    5.82
  -6 -12 -13   92.72    5.99
  -6 -12 -12   48.81    4.95
  -6 -12 -12   57.11    5.12
  -6 -12 -11   48.30    5.04
  -6 -12 -11   60.20    5.55
  -6 -12 -10    9.40    2.55
  -6 -12 -10    8.04    2.20
  -6 -12  -9   31.30    4.27
  -6 -12  -8   95.85    7.56
  -6 -12  -7   18.32    3.42
  -6 -12  -6  309.28   13.83
  -6 -12  -5   24.92    4.05
  -6 -12  -4  147.07    9.61
  -6 -12  -3  204.72   11.32
  -6 -12  -2   24.44    4.10
  -6 -12  -1  106.80    8.34
  -6 -12   0  294.15   14.06
  -6 -12   1  103.40    8.34
  -6 -12   2   27.29    4.38
  -6 -12   3  182.42   10.94
  -6 -12   4  119.64    8.74
  -6 -12   5   23.04    3.89
   6 -12 -11   65.31    4.30
   6 -12 -12   60.11    4.12
   6 -12 -13   87.93    4.82
   6 -12 -14  110.98    5.24
   6 -12 -15   33.77    2.77
   6 -12 -16    6.23    1.18
   6 -12 -17    5.19    1.09
  -6  13  15   44.84    3.04
  -6 -13 -15   35.14    3.03
  -6  13  14   81.99    4.39
  -6 -13 -14   64.12    4.57
  -6 -13 -13   10.15    2.05
  -6  13  13   10.66    1.82
  -6 -13 -12   42.32    4.28
  -6 -13 -12   54.34    4.71
  -6 -13 -11   30.03    3.60
  -6 -13 -11   31.02    3.81
  -6 -13 -10   41.26    4.63
  -6 -13 -10   56.92    5.37
  -6 -13  -9   61.69    5.82
  -6 -13  -8  170.38    9.82
  -6 -13  -7  130.64    8.73
  -6 -13  -6  115.54    8.26
  -6 -13  -5   86.37    7.23
  -6 -13  -4   32.87    4.59
  -6 -13  -3   50.19    5.69
  -6 -13  -2  261.65   12.85
  -6 -13  -1   15.73    3.27
  -6 -13   0    4.08    2.29
  -6 -13   1   15.49    3.25
  -6 -13   2  255.02   12.76
  -6 -13   3   46.91    5.51
  -6 -13   4   34.48    4.68
  -6 -13   5   68.31    6.41
   6 -13 -13    9.42    1.63
   6 -13 -14   73.42    3.96
   6 -13 -15   37.14    2.69
   6 -13 -16   29.54    2.24
  -6  14  15   11.70    1.39
  -6  14  14   56.28    3.38
  -6 -14 -13    1.68    1.21
  -6  14  13    1.06    0.77
  -6  14  12  130.78    5.83
  -6 -14 -12  114.46    6.23
  -6 -14 -11   10.06    2.08
  -6 -14 -11    8.18    2.09
  -6  14  11   11.36    1.92
  -6 -14 -10    8.78    2.11
  -6 -14 -10    5.99    1.95
  -6 -14  -9   63.50    5.63
  -6 -14  -8   97.82    7.12
  -6 -14  -7    5.24    1.98
  -6 -14  -6   43.47    4.94
  -6 -14  -5   46.70    5.20
  -6 -14  -4    0.42    1.18
  -6 -14  -3   14.95    3.14
  -6 -14  -2    3.05    1.87
  -6 -14  -1  159.19    9.72
  -6 -14   0  234.40   11.94
  -6 -14   1  147.38    9.46
  -6 -14   2    3.58    2.30
  -6 -14   3   10.81    2.69
  -6 -14   4    0.85    1.34
  -6 -14   5   38.32    4.75
  -6  15  14    5.00    0.96
  -6  15  13   13.96    1.73
  -6 -15 -12    3.13    1.06
  -6  15  12    2.93    1.00
  -6  15  11   48.43    3.46
  -6 -15 -11   39.73    3.61
  -6  15  10   71.55    4.34
  -6 -15 -10   66.84    5.11
  -6 -15  -9    3.58    1.41
  -6  15   9    3.81    1.28
  -6  15   8   25.01    2.77
  -6 -15  -8   22.91    3.33
  -6  15   7   72.51    4.71
  -6 -15  -7   56.28    5.24
  -6 -15  -6    4.61    1.67
  -6  15   6    7.48    1.92
  -6 -15  -5   12.04    2.83
  -6  15   5   12.60    2.16
  -6 -15  -4   12.68    2.74
  -6  15   4   12.33    2.19
  -6 -15  -3   18.38    3.33
  -6  15   3   24.82    2.89
  -6  15   2  140.08    6.64
  -6 -15  -2  113.10    7.95
  -6  15   1   30.96    3.16
  -6 -15  -1   29.83    4.36
  -6  15   0  263.35    8.75
  -6 -15   0  200.44   10.78
  -6 -15   1   29.26    4.20
  -6 -15   2   97.63    7.32
  -6 -15   3   16.83    3.11
  -6 -15   4    8.97    2.28
  -6 -15   5    7.94    2.19
  -6  16  12   27.96    2.27
  -6  16  11   19.92    2.06
  -6 -16 -11   18.96    2.19
  -6  16  10  114.63    5.10
  -6 -16 -10   92.16    5.38
  -6  16   9   72.21    4.17
  -6 -16  -9   64.56    4.86
  -6  16   8   77.38    4.48
  -6 -16  -8   63.21    5.00
  -6  16   7   45.06    3.52
  -6 -16  -7   35.48    4.04
  -6  16   6   31.74    3.03
  -6 -16  -6   21.70    3.23
  -6  16   5   26.87    2.82
  -6 -16  -5   23.15    3.44
  -6  16   4   48.46    3.70
  -6 -16  -4   42.34    4.60
  -6 -16  -3    9.03    2.43
  -6  16   3   15.33    2.23
  -6  16   2   44.88    3.57
  -6 -16  -2   39.73    4.48
  -6 -16  -1   17.44    3.12
  -6  16   1   18.18    2.26
  -6  16   0  380.32   10.16
  -6 -16   0  323.25   13.15
  -6 -16   1   15.15    2.94
  -6 -16   2   33.24    4.13
  -6 -16   3    8.67    2.28
  -6 -16   4   37.05    4.25
  -6 -16   5   18.89    2.98
  -6  17  11    9.13    1.28
  -6 -17 -10    9.22    1.53
  -6  17  10   12.99    1.60
  -6 -17  -9    7.09    1.55
  -6  17   9    9.60    1.54
  -6  17   8  130.97    5.39
  -6 -17  -8  115.74    6.09
  -6 -17  -7   12.99    2.21
  -6  17   7   15.36    1.99
  -6  17   6   45.59    3.33
  -6 -17  -6   39.99    3.96
  -6  17   5  168.25    6.45
  -6 -17  -5  145.93    7.73
  -6  17   4   86.25    4.62
  -6 -17  -4   71.34    5.50
  -6  17   3   54.67    3.65
  -6 -17  -3   47.78    4.60
  -6  17   2   43.71    3.19
  -6 -17  -2   34.16    3.96
  -6 -17  -1    4.92    1.79
  -6  17   1    4.93    1.19
  -6 -17   0    0.60    0.99
  -6 -17   1    3.70    1.54
  -6 -17   2   32.15    3.73
  -6 -17   3   41.45    4.14
  -6 -17   4   64.26    4.96
  -6 -17   5  128.54    6.80
  -6  18   9    6.92    1.07
  -6  18   8   26.18    2.13
  -6 -18  -8   21.86    2.27
  -6  18   7   41.34    2.78
  -6 -18  -7   37.67    3.19
  -6 -18  -6   11.18    1.97
  -6  18   6   13.01    1.70
  -6  18   5   22.33    2.12
  -6 -18  -5   21.57    2.66
  -6 -18  -4    7.27    1.77
  -6  18   4    5.26    1.19
  -6  18   3   81.90    3.99
  -6 -18  -3   80.64    5.35
  -6 -18  -2   13.02    2.36
  -6  18   2   12.13    1.57
  -6 -18  -1   58.95    4.62
  -6 -18   0    4.39    1.46
  -6 -18   1   57.03    4.46
  -6 -18   2   12.11    2.10
  -6 -18   3   66.34    4.58
  -6 -18   4    5.06    1.43
  -6 -19  -5    0.43    0.63
  -6 -19  -4   79.25    4.44
  -6 -19  -3   68.91    4.26
  -6 -19  -2    5.28    1.41
  -6 -19  -1    3.84    1.22
  -6 -19   0   -0.20    0.83
  -6 -19   1    4.26    1.18
  -6 -19   2    3.58    1.00
   7   0   0    3.68    1.96
   7   0  -1 1790.20   31.60
   7   0  -2   26.98    3.20
   7   0  -3    2.21    1.31
   7   0  -4  307.46   11.16
  -7   0  -4  285.73   12.58
  -7   0  -5    1.81    1.41
   7   0  -5    2.63    1.19
   7   0  -6  318.03   11.61
  -7   0  -6  312.04   13.37
  -7   0  -7   17.56    3.44
   7   0  -7   19.91    2.93
  -7   0  -8    8.30    2.26
   7   0  -8    8.54    2.19
   7   0  -9 1343.95   27.11
  -7   0  -9 1411.39   31.21
  -7   0 -10  320.59   13.70
  -7   0 -11  350.58   14.15
  -7   0  12   39.98    4.57
  -7   0 -12   39.82    4.64
  -7   0 -13   14.04    2.77
  -7   0  13   10.96    2.52
   7   0 -14   92.10    6.29
   7   0 -15   96.14    6.33
   7   0 -16    0.51    0.99
   7   0 -17  148.19    7.22
   7   0 -18    2.29    1.23
   7   0 -19   79.28    4.40
   7   0 -20   12.97    1.59
   7   0 -21    6.09    0.98
   7   1 -20   74.27    3.66
   7   1 -19   24.04    2.38
   7   1 -18   18.24    2.36
   7   1 -17   44.77    3.96
   7   1 -16    4.11    1.60
   7   1 -15  198.81    9.13
   7   1 -14  124.82    7.36
  -7   1  14  133.36    7.74
  -7  -1 -14  118.93    7.71
  -7   1  13   97.31    6.95
  -7  -1 -13  100.12    7.19
  -7   1  12  147.61    8.92
  -7  -1 -12  138.68    8.70
  -7   1  11  109.50    7.69
  -7  -1 -11  124.95    8.35
  -7  -1 -10  377.03   15.00
  -7  -1  -9    5.24    2.08
  -7  -1  -8  227.37   11.43
   7   1  -7  418.85   13.26
  -7  -1  -7  396.38   15.41
   7   1  -6  344.97   11.78
  -7  -1  -6  321.98   13.63
   7   1  -5  117.49    6.63
  -7  -1  -5  107.95    7.70
   7   1  -4  119.31    6.65
  -7  -1  -4  112.32    7.82
   7   1  -3  131.46    7.00
  -7  -1  -3  127.84    8.28
   7  -1   2  365.07   12.33
   7  -1   1 1061.76   22.71
   7  -1   0   95.43    6.13
   7  -1  -1 1066.33   22.99
   7  -1  -2  368.85   12.43
   7  -1  -3  142.38    7.53
  -7   1  -3  119.50    8.05
   7  -1  -4  115.33    6.81
  -7   1  -4  108.65    7.63
   7  -1  -5  111.99    6.78
  -7   1  -5  109.80    7.77
   7  -1  -6  329.58   11.99
  -7   1  -6  305.63   13.34
   7  -1  -7  405.99   13.69
  -7   1  -7  405.84   15.39
   7  -1  -8  242.08   10.44
  -7   1  -8  238.35   11.69
  -7   1  -9    9.91    2.64
   7  -1  -9    8.23    2.22
   7  -1 -10  357.35   12.86
  -7   1 -10  385.62   15.13
  -7   1 -11  130.49    8.44
  -7  -1  12  136.04    8.38
  -7   1 -12  153.47    9.09
   7  -1 -13   92.31    6.32
  -7  -1  13   85.02    6.58
   7  -1 -14  120.08    7.15
   7  -1 -15  197.84    9.05
   7  -1 -16    3.81    1.46
   7  -1 -17   48.01    4.05
   7  -1 -18   19.90    2.50
   7  -1 -19   23.53    2.45
   7  -1 -20   76.56    3.86
   7  -1 -21   25.03    1.88
   7   2 -20   46.62    2.76
   7   2 -19    6.35    1.29
   7   2 -18   82.87    4.80
   7   2 -17   29.39    3.15
   7   2 -16   76.78    5.37
   7   2 -15  159.50    8.12
  -7  -2 -14   18.28    2.96
  -7   2  14   20.79    3.09
  -7   2  13  167.15    9.21
  -7  -2 -13  169.73    9.43
  -7   2  12  181.21    9.80
  -7  -2 -12  191.11   10.22
  -7   2  11   46.58    4.97
  -7  -2 -11   44.32    4.99
  -7   2  10  240.22   11.46
  -7  -2 -10  236.45   11.72
  -7   2   9  112.54    7.74
  -7  -2  -9  106.60    7.86
  -7  -2  -8  455.66   16.74
  -7  -2  -7   15.48    3.10
  -7  -2  -6  332.39   13.91
  -7  -2  -5  189.44   10.37
  -7  -2  -4  336.10   13.90
   7  -2   3  128.14    7.20
  -7  -2  -3  128.82    8.40
   7  -2   2   26.89    3.33
   7  -2   1  322.66   11.81
   7  -2   0  524.41   15.34
   7  -2  -1  308.91   11.48
   7  -2  -2   23.59    3.10
   7  -2  -3  136.57    7.55
  -7   2  -3  120.93    8.13
   7  -2  -4  356.03   12.59
  -7   2  -4  333.80   13.80
   7  -2  -5  202.71    9.44
  -7   2  -5  193.69   10.41
   7  -2  -6  325.74   12.22
  -7   2  -6  316.38   13.50
  -7   2  -7   15.43    3.05
   7  -2  -7   15.89    2.95
   7  -2  -8  472.41   15.31
  -7   2  -8  492.39   17.21
   7  -2  -9  108.53    7.27
  -7   2  -9  112.64    7.98
   7  -2 -10  247.86   10.90
  -7   2 -10  239.79   11.75
  -7   2 -11   39.98    4.68
   7  -2 -12  171.87    8.59
   7  -2 -13  161.57    8.33
   7  -2 -14   16.74    2.80
   7  -2 -15  174.07    8.34
   7  -2 -16   87.36    5.71
   7  -2 -17   31.14    3.28
   7  -2 -18   81.64    4.87
   7  -2 -19    5.35    1.31
   7  -2 -20   49.55    3.10
   7  -2 -21    2.74    0.76
   7   3 -20    2.80    0.72
   7   3 -19    3.36    0.97
   7   3 -18   26.26    2.63
   7   3 -17   45.01    3.75
   7   3 -16  246.57    9.62
   7   3 -15  247.31   10.05
  -7   3  14  137.19    7.97
  -7  -3 -14  132.58    8.03
  -7   3  13   71.17    5.95
  -7  -3 -13   73.18    6.23
  -7   3  12   43.72    4.78
  -7  -3 -12   41.85    4.80
  -7   3  11  586.73   18.43
  -7  -3 -11  587.11   19.16
  -7   3  10  139.16    8.65
  -7  -3 -10  149.36    9.32
  -7  -3  -9   24.13    3.75
  -7   3   9   20.96    3.43
  -7   3   8   50.28    5.12
  -7  -3  -8   53.34    5.62
  -7  -3  -7  102.74    7.65
  -7  -3  -6  104.26    7.85
  -7  -3  -5  448.00   16.45
   7  -3   4  162.11    8.15
  -7  -3  -4  144.53    9.12
  -7  -3  -3   20.81    3.55
   7  -3   3   20.54    2.96
   7  -3   2  409.33   13.60
  -7  -3  -2  376.45   15.05
   7  -3   1   56.32    4.86
   7  -3   0   32.64    3.72
   7  -3  -1   58.95    5.01
   7  -3  -2  424.75   13.94
  -7   3  -2  359.30   14.20
  -7   3  -3   15.69    2.99
   7  -3  -3   17.90    2.84
   7  -3  -4  155.62    8.39
  -7   3  -4  151.13    9.15
   7  -3  -5  467.11   15.17
  -7   3  -5  445.88   16.24
   7  -3  -6  113.09    7.39
  -7   3  -6  106.02    7.77
   7  -3  -7  103.85    7.11
  -7   3  -7   94.49    7.33
   7  -3  -8   55.95    5.27
  -7   3  -8   55.02    5.55
   7  -3  -9   18.26    3.10
  -7   3  -9   28.20    4.24
   7  -3 -10  129.82    8.01
   7  -3 -11  539.69   15.84
   7  -3 -12   38.95    4.04
   7  -3 -13   73.38    5.53
   7  -3 -14  120.94    7.02
   7  -3 -15  254.44   10.05
   7  -3 -16  261.10    9.81
   7  -3 -17   48.79    3.97
   7  -3 -18   28.93    2.88
   7  -3 -19    1.66    0.84
   7  -3 -20    3.55    0.96
   7  -3 -21   78.85    3.37
   7   4 -19    4.26    1.02
   7   4 -18   50.94    3.49
   7   4 -17   35.25    3.25
   7   4 -16  111.49    6.20
   7   4 -15  111.11    6.52
  -7   4  14   41.10    4.41
  -7  -4 -14   37.54    4.26
  -7   4  13  301.81   12.40
  -7  -4 -13  303.19   12.85
  -7   4  12  138.48    8.44
  -7  -4 -12  150.74    9.14
  -7  -4 -11   22.94    3.90
  -7   4  11   27.57    3.96
  -7  -4 -10    7.22    2.40
  -7   4  10    8.28    2.29
  -7   4   9   40.28    4.59
  -7  -4  -9   41.54    5.02
  -7   4   8  680.03   19.90
  -7  -4  -8  706.48   21.49
  -7   4   7  202.93   10.32
  -7  -4  -7  209.45   11.25
  -7   4   6   84.14    6.51
  -7  -4  -6   87.17    7.12
  -7   4   5   84.13    6.41
   7  -4   5   94.42    6.15
  -7  -4  -5   90.87    7.38
   7  -4   4  481.80   14.88
  -7  -4  -4  444.67   16.84
   7  -4   3  193.63    9.25
  -7  -4  -3  179.25   10.39
  -7  -4  -2   20.28    3.55
   7  -4   2   16.56    2.94
   7  -4   1   70.66    5.60
  -7  -4  -1   65.11    6.19
  -7  -4   0   24.91    3.93
   7  -4   0   22.21    3.32
   7  -4  -1   74.15    5.87
  -7   4  -1   58.24    5.59
  -7  -4   1   66.35    6.25
  -7   4  -2   17.58    3.21
   7  -4  -2   15.85    2.90
   7  -4  -3  187.37    9.41
  -7   4  -3  164.62    9.66
   7  -4  -4  498.40   16.03
  -7   4  -4  445.78   16.37
   7  -4  -5   94.67    6.82
  -7   4  -5   87.73    7.06
   7  -4  -6   91.93    6.73
  -7   4  -6   87.36    7.27
   7  -4  -7  214.76   10.61
   7  -4  -8  739.00   20.85
   7  -4  -9   43.12    4.07
   7  -4  -9   40.84    4.91
   7  -4 -10    7.91    1.72
   7  -4 -10    1.73    1.45
   7  -4 -11   24.59    3.13
   7  -4 -12  135.81    7.44
   7  -4 -13  275.18   10.71
   7  -4 -14   31.68    3.59
   7  -4 -15  120.13    6.64
   7  -4 -16  125.57    6.53
   7  -4 -17   32.37    3.15
   7  -4 -18   54.12    3.80
   7  -4 -19    3.90    1.03
   7  -4 -20    6.50    1.16
   7  -4 -21    5.15    0.89
   7   5 -18   23.82    2.23
   7   5 -17    8.19    1.56
   7   5 -16   35.03    3.32
   7   5 -15   27.86    3.14
  -7  -5 -14  460.06   15.24
  -7   5  13   42.72    4.63
  -7  -5 -13   35.36    4.32
  -7   5  12   80.63    6.39
  -7  -5 -12   76.34    6.59
  -7   5  11   61.77    5.74
  -7  -5 -11   56.62    5.71
  -7   5  10   42.36    4.67
  -7  -5 -10   46.62    5.28
  -7   5   9   66.72    5.95
  -7  -5  -9   62.02    6.23
  -7  -5  -8   13.49    2.96
  -7   5   8   11.04    2.41
  -7   5   7   35.49    4.36
  -7  -5  -7   36.66    4.76
  -7   5   6   63.74    5.67
  -7  -5  -6   65.94    6.39
  -7   5   5  256.51   11.55
   7  -5   5  275.40   10.96
  -7  -5  -5  258.24   12.73
  -7   5   4  498.95   16.21
   7  -5   4  522.59   15.93
  -7  -5  -4  485.82   17.95
  -7   5   3   33.46    4.09
   7  -5   3   32.38    4.00
  -7  -5  -3   27.91    4.35
  -7   5   2  260.35   11.24
   7  -5   2  279.62   11.67
  -7  -5  -2  267.01   13.02
  -7  -5  -1   19.21    3.58
  -7   5   1   17.37    2.90
   7  -5   1   18.53    3.09
  -7  -5   0   26.92    4.18
  -7   5   0   27.49    3.44
   7  -5   0   27.08    3.61
  -7  -5   1   14.16    2.90
  -7   5  -1   20.44    2.99
   7  -5  -1   20.65    3.53
  -7   5  -2  274.47   10.83
   7  -5  -2  285.27   12.04
  -7  -5   2  246.98   12.33
  -7  -5   3   24.47    3.90
   7  -5  -3   31.28    4.12
   7  -5  -4  534.62   17.29
   7  -5  -5  295.45   12.71
   7  -5  -6   65.79    4.87
   7  -5  -6   62.11    5.77
   7  -5  -7   36.30    3.67
   7  -5  -7   32.06    4.24
   7  -5  -8   11.97    2.19
   7  -5  -8    7.75    2.26
   7  -5  -9   61.48    4.92
   7  -5  -9   64.66    6.01
   7  -5 -10   43.74    4.12
   7  -5 -11   58.40    4.83
   7  -5 -12   76.49    5.51
   7  -5 -13   40.12    3.96
   7  -5 -14  423.04   12.94
   7  -5 -15   31.60    3.37
   7  -5 -16   34.62    3.38
   7  -5 -17    9.66    1.79
   7  -5 -18   25.97    2.54
   7  -5 -19   18.43    1.99
   7  -5 -20   22.29    1.95
   7  -5 -21   30.96    2.00
   7   6 -17   21.86    2.26
   7   6 -16   24.04    2.67
   7   6 -15   10.26    1.91
  -7  -6 -14   71.55    5.71
  -7  -6 -13  125.97    8.01
  -7   6  12  199.41   10.10
  -7  -6 -12  188.02   10.22
  -7   6  11  181.27    9.69
  -7  -6 -11  173.84   10.08
  -7   6  10  218.26   10.66
  -7  -6 -10  230.82   11.78
  -7   6   9  243.19   11.29
  -7  -6  -9  246.29   12.29
  -7   6   8  249.40   11.42
  -7  -6  -8  247.02   12.55
  -7  -6  -7   17.44    3.68
  -7   6   7   19.65    3.28
  -7   6   6   44.82    4.75
  -7  -6  -6   48.94    5.57
  -7   6   5  135.38    8.22
  -7  -6  -5  139.60    9.39
  -7   6   4  229.37   10.69
   7  -6   4  230.42   10.49
  -7  -6  -4  238.44   12.37
  -7   6   3  413.10   14.58
   7  -6   3  439.45   14.94
  -7  -6  -3  420.69   16.80
  -7   6   2  450.56   15.07
   7  -6   2  467.45   15.75
  -7  -6  -2  451.29   17.55
  -7   6   1  128.38    7.66
   7  -6   1  138.70    8.42
  -7  -6  -1  125.78    9.03
  -7   6   0   68.50    5.51
   7  -6   0   73.71    6.19
  -7  -6   0   65.81    6.55
  -7   6  -1  126.14    7.36
   7  -6  -1  133.81    8.41
  -7  -6   1  123.81    8.92
  -7   6  -2  460.64   14.24
   7  -6  -2  444.11   15.87
  -7  -6   2  417.47   16.74
   7  -6  -3  411.30   15.27
  -7  -6   3  380.03   15.73
   7  -6  -4  245.67   11.81
   7  -6  -5  148.85    9.23
   7  -6  -6   47.47    4.15
   7  -6  -6   51.99    5.59
   7  -6  -7   20.72    2.83
   7  -6  -7   16.95    3.33
   7  -6  -8  254.13   10.02
   7  -6  -8  252.55   12.31
   7  -6  -9  230.49    9.54
   7  -6 -10  201.39    8.94
   7  -6 -11  162.92    7.97
   7  -6 -12  172.78    8.14
   7  -6 -13  117.19    6.61
   7  -6 -14   78.71    5.19
   7  -6 -15   12.49    2.04
   7  -6 -16   26.11    2.78
   7  -6 -17   22.49    2.42
   7  -6 -18   11.19    1.64
   7  -6 -19   77.38    3.85
   7  -6 -20   24.67    1.98
   7   7 -16  130.99    5.79
   7   7 -15   35.03    3.25
  -7  -7 -14   43.09    4.44
  -7  -7 -13   96.81    6.96
  -7  -7 -12   28.59    4.04
  -7  -7 -11   42.89    5.00
  -7   7  10  143.25    8.61
  -7  -7 -10  141.87    9.29
  -7   7   9   97.51    7.07
  -7  -7  -9  105.82    8.05
  -7   7   8  111.33    7.50
  -7  -7  -8  111.45    8.41
  -7   7   7   50.52    5.04
  -7  -7  -7   53.03    5.86
  -7   7   6  262.20   11.57
  -7  -7  -6  258.31   13.01
  -7  -7  -5   15.33    3.38
  -7   7   5    9.77    2.44
  -7   7   4   44.93    4.73
   7  -7   4   50.36    5.02
  -7  -7  -4   51.78    5.81
  -7   7   3  147.36    8.45
   7  -7   3  145.84    8.63
  -7  -7  -3  151.48   10.08
  -7   7   2  195.09    9.73
   7  -7   2  203.22   10.53
  -7  -7  -2  211.58   11.97
  -7   7   1  358.29   13.29
   7  -7   1  407.47   15.12
  -7  -7  -1  378.63   16.24
  -7   7   0  439.24   14.47
   7  -7   0  461.70   16.42
  -7  -7   0  428.71   17.49
  -7   7  -1  373.10   13.10
   7  -7  -1  399.51   15.35
  -7  -7   1  355.47   15.79
  -7   7  -2  202.46    9.14
   7  -7  -2  221.05   11.29
  -7  -7   2  199.13   11.64
   7  -7  -3  154.28    9.52
  -7  -7   3  133.24    9.40
   7  -7  -4   51.19    5.49
   7  -7  -5   12.55    2.99
   7  -7  -6  265.15   12.73
   7  -7  -7   59.48    4.69
   7  -7  -7   57.78    6.03
   7  -7  -8  106.54    6.27
   7  -7  -9   82.84    5.58
   7  -7 -10  140.12    7.23
   7  -7 -11   41.24    3.92
   7  -7 -12   27.91    3.27
   7  -7 -13   92.68    5.58
   7  -7 -14   39.65    3.53
   7  -7 -15   33.73    3.15
   7  -7 -16  128.29    5.88
   7  -7 -17   10.18    1.59
   7  -7 -18   31.51    2.54
   7  -7 -19    2.54    0.85
   7  -7 -20   56.79    2.82
   7   8 -15   40.36    3.21
  -7  -8 -14   13.30    2.42
  -7  -8 -13   21.55    3.16
  -7  -8 -12  194.54   10.13
  -7  -8 -11   69.73    6.36
  -7  -8 -10   52.30    5.54
  -7  -8  -9  326.11   14.46
  -7   8   8  199.86   10.16
  -7  -8  -8  201.21   11.24
  -7   8   7   77.08    6.25
  -7  -8  -7   70.68    6.70
  -7   8   6  167.29    9.23
  -7  -8  -6  158.91   10.14
  -7   8   5   95.15    6.86
  -7  -8  -5   91.22    7.78
  -7   8   4  155.56    8.77
  -7  -8  -4  158.10   10.35
  -7  -8  -3   10.90    2.82
  -7   8   3   14.40    2.75
   7  -8   3    7.40    2.38
  -7  -8  -2    2.59    1.41
  -7   8   2    3.56    1.64
  -7   8   1  218.41   10.09
   7  -8   1  221.97   11.46
  -7  -8  -1  224.35   12.54
  -7   8   0  135.35    7.73
   7  -8   0  136.11    9.05
  -7  -8   0  117.57    9.19
  -7   8  -1  213.78    9.61
   7  -8  -1  204.66   11.25
  -7  -8   1  204.94   12.12
  -7  -8   2    4.61    2.08
   7  -8  -2    6.67    2.33
  -7  -8   3    6.35    2.37
   7  -8  -3   12.48    2.95
   7  -8  -4  152.22    9.72
  -7  -8   4  142.63    9.62
   7  -8  -5   84.07    7.26
   7  -8  -8  196.23    8.36
   7  -8  -9  318.98   10.89
   7  -8 -10   56.79    4.44
   7  -8 -11   66.62    4.74
   7  -8 -12  174.65    7.62
   7  -8 -13   18.88    2.54
   7  -8 -14   12.57    2.01
   7  -8 -15   36.06    3.13
   7  -8 -16   42.04    3.17
   7  -8 -17   60.03    3.58
   7  -8 -18   70.93    3.63
   7  -8 -19   -0.36    0.62
  -7  -9 -14   12.14    2.19
  -7  -9 -13    2.63    1.36
  -7  -9 -12  135.93    8.23
  -7  -9 -11  263.86   12.15
  -7  -9 -10   61.21    5.94
  -7  -9  -9    0.36    1.19
  -7  -9  -8    1.44    1.30
  -7  -9  -7  262.82   13.04
  -7  -9  -6   51.98    5.79
  -7   9   5   42.99    4.76
  -7  -9  -5   44.53    5.43
  -7   9   4   62.85    5.64
  -7  -9  -4   65.47    6.62
  -7   9   3   66.80    5.76
  -7  -9  -3   62.48    6.60
  -7   9   2   61.87    5.51
   7  -9   2   66.85    6.26
  -7  -9  -2   69.60    6.93
  -7   9   1  597.81   17.53
   7  -9   1  559.18   19.10
  -7  -9  -1  549.59   20.22
   7  -9   0  140.02    9.32
  -7  -9   0  147.48   10.23
   7  -9  -1  554.50   19.38
  -7  -9   1  546.94   20.20
   7  -9  -2   71.76    6.83
  -7  -9   2   68.86    6.89
  -7  -9   3   52.83    6.13
  -7  -9   4   54.66    5.97
   7  -9  -9    1.08    1.06
   7  -9 -10   55.75    4.23
   7  -9 -11  271.64    9.46
   7  -9 -12  132.31    6.32
   7  -9 -13    0.62    0.97
   7  -9 -14   13.70    2.00
   7  -9 -15   67.65    3.96
   7  -9 -16    0.98    0.65
   7  -9 -17   54.32    3.20
   7  -9 -18    6.89    1.09
  -7  10  16   11.64    1.62
  -7 -10 -13   44.92    4.29
  -7 -10 -12   10.21    2.28
  -7 -10 -11   18.23    3.19
  -7 -10 -10   37.40    4.65
  -7 -10  -9   81.11    6.91
  -7 -10  -8    6.97    2.30
  -7 -10  -7   53.21    5.80
  -7 -10  -6   46.01    5.41
  -7 -10  -5  261.39   13.17
  -7 -10  -4    9.10    2.75
  -7 -10  -3  134.01    9.49
  -7 -10  -2   10.25    3.03
  -7 -10  -1  104.14    8.53
  -7 -10   0    0.60    1.42
  -7 -10   1   96.73    8.41
  -7 -10   2    9.76    2.96
  -7 -10   3  119.97    9.00
  -7 -10   4    9.47    2.70
   7 -10 -10   37.25    3.38
   7 -10 -11   21.90    2.50
   7 -10 -12   14.20    1.97
   7 -10 -13   37.69    3.08
   7 -10 -14   12.73    1.74
   7 -10 -15   14.11    1.77
   7 -10 -16   11.68    1.57
   7 -10 -17   19.75    1.80
   7 -10 -18   13.39    1.38
  -7  11  15    2.35    0.99
  -7 -11 -13   43.00    3.95
  -7 -11 -12    5.10    1.64
  -7 -11 -11   47.56    4.80
  -7 -11 -10   77.15    6.38
  -7 -11  -9  104.94    7.67
  -7 -11  -8  175.21   10.08
  -7 -11  -7  102.95    7.96
  -7 -11  -6   22.22    3.76
  -7 -11  -5  172.05   10.44
  -7 -11  -4  130.33    9.21
  -7 -11  -3   36.05    5.06
  -7 -11  -2  422.75   17.18
  -7 -11  -1   54.94    6.22
  -7 -11   0  120.10    9.11
  -7 -11   1   53.37    6.18
  -7 -11   2  391.70   16.55
  -7 -11   3   28.52    4.37
  -7 -11   4  103.77    8.25
   7 -11 -11   57.46    3.76
   7 -11 -12    4.60    1.18
   7 -11 -13   40.17    2.95
   7 -11 -14   32.71    2.56
   7 -11 -15    1.72    0.78
   7 -11 -16   58.35    3.05
  -7  12  15   53.06    3.07
  -7  12  14    4.94    1.24
  -7 -12 -13    5.09    1.44
  -7 -12 -12   30.27    3.35
  -7 -12 -11   83.77    5.95
  -7 -12 -10  131.16    7.94
  -7 -12  -9    9.83    2.59
  -7 -12  -8   86.84    6.80
  -7 -12  -7   28.58    4.07
  -7 -12  -6   19.39    3.56
  -7 -12  -5   34.83    4.66
  -7 -12  -4   10.63    2.90
  -7 -12  -3  135.11    9.21
  -7 -12  -2   24.60    4.06
  -7 -12  -1  125.07    9.04
  -7 -12   0   32.09    4.61
  -7 -12   1  118.93    8.84
  -7 -12   2   21.76    3.95
  -7 -12   3  124.66    8.92
  -7 -12   4    7.57    2.30
   7 -12 -14    3.66    0.93
   7 -12 -15   40.50    2.42
  -7  13  14   65.04    3.47
  -7  13  13  119.14    5.15
  -7 -13 -12    0.20    0.91
  -7  13  12    0.31    0.86
  -7 -13 -11  160.41    7.73
  -7 -13 -10   15.56    2.66
  -7 -13  -9    2.09    1.37
  -7 -13  -8   11.43    2.42
  -7 -13  -7    3.06    1.57
  -7 -13  -6   20.85    3.41
  -7 -13  -5   90.05    7.22
  -7 -13  -4    0.54    1.47
  -7 -13  -3   65.86    6.32
  -7 -13  -2   31.44    4.46
  -7 -13  -1   15.62    3.33
  -7 -13   0   63.62    6.35
  -7 -13   1   15.08    3.25
  -7 -13   2   28.44    4.22
  -7 -13   3   62.97    6.15
  -7 -13   4   -0.65    1.30
  -7  14  13    5.34    1.08
  -7 -14 -12   11.60    1.75
  -7  14  12   12.11    1.66
  -7 -14 -11   11.11    1.92
  -7  14  11   15.04    1.95
  -7 -14 -10   14.93    2.40
  -7  14  10   21.26    2.36
  -7 -14  -9   19.92    2.82
  -7 -14  -8    6.72    1.86
  -7 -14  -7    5.35    1.82
  -7 -14  -6  117.28    7.61
  -7 -14  -5    2.77    1.73
  -7 -14  -4   20.03    3.40
  -7 -14  -3   75.57    6.49
  -7 -14  -2   -1.65    1.25
  -7 -14  -1   23.26    3.77
  -7 -14   0   47.15    5.20
  -7 -14   1   20.22    3.62
  -7 -14   2    2.50    1.55
  -7 -14   3   65.80    6.04
  -7 -14   4   13.17    2.74
  -7  15  12    3.16    0.79
  -7  15  11   26.92    2.27
  -7 -15 -11   23.70    2.37
  -7  15  10   27.71    2.46
  -7 -15 -10   21.87    2.51
  -7  15   9   26.85    2.51
  -7 -15  -9   21.88    2.73
  -7  15   8   51.36    3.57
  -7 -15  -8   44.78    4.09
  -7 -15  -7    1.16    0.92
  -7  15   7    2.50    1.07
  -7 -15  -6   20.14    3.06
  -7  15   6   35.86    3.13
  -7  15   5   72.56    4.48
  -7 -15  -5   59.27    5.23
  -7  15   4  194.15    7.42
  -7 -15  -4  156.97    8.69
  -7 -15  -3   20.30    3.32
  -7  15   3   27.81    2.81
  -7 -15  -2    0.80    1.29
  -7  15   2    2.62    1.14
  -7 -15  -1   22.01    3.43
  -7  15   1   30.45    2.76
  -7 -15   0   11.79    2.59
  -7 -15   1   22.28    3.39
  -7 -15   2    1.61    1.29
  -7 -15   3   18.12    2.99
  -7 -15   4  151.89    8.22
  -7  16  10    3.69    0.92
  -7 -16  -9    1.94    0.95
  -7  16   9    1.95    0.84
  -7  16   8   52.12    3.25
  -7 -16  -8   46.75    3.74
  -7 -16  -7   15.68    2.34
  -7  16   7   12.25    1.72
  -7 -16  -6    9.70    2.00
  -7  16   6   11.49    1.68
  -7 -16  -5    5.61    1.64
  -7  16   5    8.97    1.57
  -7  16   4   29.29    2.67
  -7 -16  -4   25.26    3.29
  -7 -16  -3   11.24    2.30
  -7  16   3   17.78    2.00
  -7 -16  -2   16.93    2.71
  -7  16   2   22.18    2.22
  -7 -16  -1   11.81    2.34
  -7  16   1   13.58    1.74
  -7 -16   0    9.21    2.05
  -7 -16   1    7.83    1.95
  -7 -16   2   16.45    2.64
  -7 -16   3    8.83    1.90
  -7 -16   4   24.31    2.97
  -7  17   8   14.51    1.53
  -7 -17  -8   13.06    1.71
  -7 -17  -7    1.96    0.96
  -7  17   7   -0.99    0.74
  -7 -17  -6    1.70    0.97
  -7  17   6    3.25    0.98
  -7  17   5  184.60    5.95
  -7 -17  -5  173.95    7.43
  -7  17   4   28.02    2.31
  -7 -17  -4   23.91    2.83
  -7 -17  -3    9.70    1.90
  -7  17   3    8.70    1.35
  -7 -17  -2    9.99    1.95
  -7  17   2   11.33    1.41
  -7 -17  -1   26.44    3.12
  -7 -17   0   16.95    2.43
  -7 -17   1   27.29    3.04
  -7 -17   2    9.49    1.82
  -7 -17   3    6.05    1.44
  -7 -18  -5   11.52    1.61
  -7 -18  -4    6.72    1.33
  -7 -18  -3    1.43    0.74
  -7 -18  -2   25.68    2.59
  -7 -18  -1   11.57    1.80
  -7 -18   0   47.38    3.43
  -7 -18   1   14.07    1.85
  -8   0   0   93.88    7.22
  -8   0   1   15.66    3.22
  -8   0  -1   15.80    3.03
  -8   0   2   89.58    6.85
  -8   0  -2   89.24    7.14
  -8   0  -3   83.62    7.00
   8   0  -4  160.20    8.42
  -8   0  -4  152.10    9.57
  -8   0  -5    2.27    2.00
   8   0  -5    2.52    1.88
  -8   0  -6  676.65   20.91
  -8   0  -7   33.11    4.52
  -8   0  -8   22.79    3.81
  -8   0  -9    2.21    1.23
  -8   0 -10  156.47    9.50
  -8   0  11   43.10    4.81
  -8   0 -11   53.03    5.37
  -8   0  12  124.02    8.04
  -8   0 -12  149.13    8.79
   8   0 -13   79.90    5.77
  -8   0  13   88.60    6.49
   8   0 -14    0.07    1.22
  -8   0  14    0.66    0.98
   8   0 -15   65.73    4.93
   8   0 -16   50.26    4.03
   8   0 -17   11.58    1.95
   8   0 -18   11.01    1.70
   8   0 -19    0.41    0.57
   8   1 -19   16.89    1.74
   8   1 -18   15.50    1.90
   8   1 -17   20.94    2.45
   8   1 -16    7.25    1.76
   8   1 -15   54.78    4.45
   8   1 -14   52.53    4.57
  -8   1  14   54.91    4.82
  -8   1  13   87.96    6.48
  -8  -1 -13   95.52    6.77
  -8   1  12   36.54    4.37
  -8  -1 -12   40.69    4.70
  -8   1  11  171.40    9.76
  -8  -1 -11  179.60   10.00
  -8   1  10   84.67    6.88
  -8  -1 -10   94.20    7.30
  -8  -1  -9   12.44    2.79
  -8  -1  -8   49.05    5.45
  -8  -1  -7   12.87    2.82
  -8  -1  -6   23.36    3.85
  -8  -1  -5  463.25   17.33
  -8  -1  -4  637.08   20.34
  -8  -1  -3   83.01    7.07
  -8   1   2  152.55    8.92
  -8  -1  -2  160.96    9.79
  -8   1   1  286.31   12.70
  -8  -1  -1  312.64   13.71
  -8   1   0    0.84    1.30
   8  -1   0    4.16    2.00
  -8   1  -1  293.75   13.13
  -8  -1   1  304.14   13.24
   8  -1  -2  167.56    8.69
  -8   1  -2  147.69    9.28
  -8  -1   2  157.94    9.28
   8  -1  -3   95.78    6.59
  -8   1  -3   86.40    7.06
   8  -1  -4  684.20   18.68
  -8   1  -4  615.45   20.02
   8  -1  -5  501.26   15.83
  -8   1  -5  480.52   17.41
  -8   1  -6   20.61    3.48
   8  -1  -6   19.66    3.13
  -8   1  -7    9.51    2.59
   8  -1  -7   10.70    2.32
  -8   1  -8   44.90    5.21
  -8   1  -9   11.27    2.67
  -8   1 -10   97.14    7.36
  -8   1 -11  190.61   10.34
   8  -1 -12   40.24    4.10
  -8  -1  12   36.72    4.38
   8  -1 -13   84.33    5.87
  -8  -1  13   84.81    6.40
   8  -1 -14   57.07    4.68
   8  -1 -15   57.42    4.56
   8  -1 -16    8.41    1.76
   8  -1 -17   19.79    2.40
   8  -1 -18   16.24    1.94
   8  -1 -19   18.31    1.86
   8  -1 -20   11.45    1.22
   8   2 -19   34.06    2.32
   8   2 -18   25.77    2.37
   8   2 -17   19.08    2.34
   8   2 -16    7.42    1.66
   8   2 -15   61.14    4.68
  -8  -2 -14   19.26    3.03
   8   2 -14   15.96    2.51
  -8   2  14   16.14    2.67
  -8   2  13   43.32    4.62
  -8  -2 -13   47.17    4.78
  -8  -2 -12    6.50    1.85
  -8   2  12    7.94    1.89
  -8   2  11   70.19    6.11
  -8  -2 -11   66.51    6.18
  -8   2  10  136.39    8.68
  -8  -2 -10  142.80    9.02
  -8   2   9   54.65    5.51
  -8  -2  -9   51.92    5.45
  -8   2   8  118.60    8.12
  -8  -2  -8  138.21    9.02
  -8  -2  -7   66.27    6.33
  -8  -2  -6  308.23   13.83
  -8  -2  -5  123.97    8.74
  -8  -2  -4   77.91    6.90
  -8  -2  -3  772.61   22.99
  -8   2   2   14.09    3.00
  -8  -2  -2   16.87    3.26
   8  -2   1  182.36    9.21
  -8   2   1  156.86    9.25
  -8  -2  -1  164.56    9.98
   8  -2   0  230.40   10.39
  -8  -2   0  218.35   11.45
   8  -2  -1  178.97    9.23
  -8   2  -1  159.01    9.55
  -8  -2   1  152.47    9.37
  -8   2  -2   12.35    2.97
  -8  -2   2   16.65    3.24
   8  -2  -2   19.08    3.02
   8  -2  -3  838.82   21.38
  -8   2  -3  735.56   22.12
   8  -2  -4   79.47    6.22
  -8   2  -4   68.50    6.41
   8  -2  -5  129.41    7.92
  -8   2  -5  121.51    8.64
   8  -2  -6  329.43   13.00
  -8   2  -6  312.13   13.82
   8  -2  -7   53.43    5.18
  -8   2  -7   62.30    6.07
  -8   2  -8  140.28    9.21
  -8   2  -9   52.50    5.50
  -8   2 -10  151.99    9.27
   8  -2 -11   68.56    5.29
   8  -2 -12    6.67    1.82
  -8  -2  12    7.54    1.92
   8  -2 -13   47.20    4.34
  -8  -2  13   45.02    4.63
   8  -2 -14   16.41    2.56
   8  -2 -15   66.84    4.83
   8  -2 -16    6.47    1.61
   8  -2 -17   19.11    2.31
   8  -2 -18   25.38    2.40
   8  -2 -19   34.00    2.44
   8  -2 -20    9.01    1.11
   8   3 -19   52.11    2.69
   8   3 -18   33.82    2.58
   8   3 -17   46.53    3.43
   8   3 -16   13.50    2.06
   8   3 -15    2.07    1.08
  -8  -3 -14   18.60    2.95
   8   3 -14   13.68    2.34
  -8   3  14   16.31    2.74
  -8   3  13   46.67    4.73
  -8  -3 -13   48.23    4.86
  -8   3  12   58.09    5.43
  -8  -3 -12   52.06    5.24
  -8  -3 -11    5.76    2.05
  -8   3  11    4.70    1.79
  -8   3  10  178.41    9.92
  -8  -3 -10  194.14   10.60
  -8   3   9   26.28    3.90
  -8  -3  -9   29.78    4.25
  -8   3   8  209.89   10.90
  -8  -3  -8  227.46   11.70
  -8   3   7  134.96    8.66
  -8  -3  -7  136.58    9.13
  -8   3   6  133.15    8.56
  -8  -3  -6  137.17    9.20
  -8  -3  -5   24.30    3.77
  -8  -3  -4  160.76   10.04
  -8  -3  -3  171.08   10.36
   8  -3   2  416.26   14.46
  -8  -3  -2  381.93   15.77
   8  -3   1  229.66   10.66
  -8  -3  -1  219.93   11.80
   8  -3   0  243.54   11.00
  -8   3   0  208.32   10.83
  -8  -3   0  221.87   11.77
  -8   3  -1  202.50   10.76
  -8  -3   1  207.48   11.23
  -8   3  -2  352.56   14.61
  -8  -3   2  361.78   14.79
   8  -3  -3  186.55    9.76
  -8   3  -3  164.22    9.87
   8  -3  -4  173.83    9.43
  -8   3  -4  157.68    9.74
  -8   3  -5   27.33    4.15
   8  -3  -5   27.03    3.92
   8  -3  -6  155.22    8.99
  -8   3  -6  141.58    9.41
  -8   3  -7  138.04    9.23
   8  -3 -10  186.77    8.76
   8  -3 -11    5.22    1.54
   8  -3 -12   52.82    4.57
   8  -3 -13   47.11    4.36
  -8  -3  13   41.07    4.29
   8  -3 -14   12.38    2.20
   8  -3 -15    0.90    0.99
   8  -3 -16   12.07    2.01
   8  -3 -17   41.47    3.27
   8  -3 -18   32.01    2.63
   8  -3 -19   55.96    3.07
   8  -3 -20   61.44    2.76
   8   4 -18   49.32    2.93
   8   4 -17   15.66    1.97
   8   4 -16   43.59    3.52
   8   4 -15   17.55    2.42
  -8  -4 -14    9.29    2.22
  -8  -4 -13   10.53    2.39
  -8   4  13   12.87    2.67
  -8   4  12  167.78    9.14
  -8  -4 -12  183.38    9.73
  -8   4  11   56.50    5.45
  -8  -4 -11   56.27    5.57
  -8   4  10  170.96    9.59
  -8  -4 -10  187.95   10.50
  -8   4   9  145.66    8.88
  -8  -4  -9  144.76    9.31
  -8   4   8   96.21    7.32
  -8  -4  -8  114.67    8.36
  -8  -4  -7   13.23    3.04
  -8   4   7   16.85    3.13
  -8   4   6   60.68    5.73
  -8  -4  -6   59.25    6.14
  -8   4   5   22.04    3.62
  -8  -4  -5   28.73    4.36
  -8   4   4  555.95   17.80
  -8  -4  -4  550.75   19.54
  -8   4   3  230.22   11.06
   8  -4   3  246.11   11.08
  -8  -4  -3  252.02   12.88
  -8  -4  -2    5.86    2.44
  -8   4   2    7.72    2.22
   8  -4   2    3.12    1.91
  -8   4   1  102.97    7.13
   8  -4   1  116.90    7.69
  -8  -4  -1  107.22    8.47
  -8   4   0   69.50    5.79
   8  -4   0   76.49    6.27
  -8  -4   0   66.08    6.60
  -8   4  -1  105.65    6.96
   8  -4  -1  106.30    7.47
  -8  -4   1   99.85    7.94
  -8  -4   2    4.54    2.23
  -8   4  -2    6.96    1.83
   8  -4  -2    7.70    2.09
   8  -4  -3  246.23   11.44
  -8  -4   3  213.17   11.30
   8  -4  -4  573.77   18.16
   8  -4  -5   21.83    3.48
   8  -4  -8   98.99    6.20
   8  -4  -9  135.99    7.28
   8  -4 -10  162.35    8.01
   8  -4 -11   48.83    4.33
   8  -4 -12  157.17    7.74
   8  -4 -13   13.14    2.26
   8  -4 -14    8.11    1.84
   8  -4 -15   18.90    2.47
   8  -4 -16   42.78    3.43
   8  -4 -17   15.06    1.90
   8  -4 -18   46.40    3.04
   8  -4 -19   54.34    2.95
   8   5 -18   32.60    2.17
   8   5 -17   75.04    3.91
   8   5 -16    1.60    0.89
   8   5 -15   14.68    2.16
  -8  -5 -14   44.18    4.25
  -8  -5 -13   22.57    3.29
  -8   5  12   29.46    3.92
  -8  -5 -12   26.23    3.65
  -8   5  11  107.90    7.42
  -8  -5 -11  112.04    7.80
  -8   5  10   57.80    5.50
  -8  -5 -10   57.60    5.82
  -8   5   9  275.96   12.33
  -8  -5  -9  288.46   13.25
  -8   5   8   59.96    5.72
  -8  -5  -8   62.23    6.22
  -8   5   7  280.25   12.45
  -8  -5  -7  290.47   13.63
  -8   5   6  276.29   12.33
  -8  -5  -6  285.35   13.54
  -8   5   5  100.18    7.34
  -8  -5  -5  104.72    8.22
  -8  -5  -4   19.43    3.76
  -8   5   4   17.35    3.14
   8  -5   4   21.09    3.24
  -8   5   3  428.67   15.43
   8  -5   3  454.16   15.65
  -8  -5  -3  442.73   17.52
  -8   5   2  139.06    8.48
   8  -5   2  142.35    8.67
  -8  -5  -2  146.51    9.99
  -8   5   1  253.50   11.33
   8  -5   1  261.37   11.92
  -8  -5  -1  242.27   12.89
  -8  -5   0   10.79    2.93
  -8   5   0    7.46    1.98
   8  -5   0    7.92    2.19
  -8   5  -1  255.16   10.91
   8  -5  -1  261.23   11.95
  -8  -5   1  223.40   12.22
  -8   5  -2  151.86    8.17
   8  -5  -2  138.80    8.72
  -8  -5   2  137.67    9.31
   8  -5  -3  456.09   16.14
  -8  -5   3  386.11   15.62
   8  -5  -4   18.53    3.53
   8  -5  -6  268.38   10.16
   8  -5  -7  281.01   10.45
   8  -5  -8   56.53    4.55
   8  -5  -9  257.19    9.97
   8  -5 -10   50.99    4.33
   8  -5 -11   96.07    5.97
   8  -5 -12   29.63    3.24
   8  -5 -13   14.58    2.26
   8  -5 -14   35.93    3.36
   8  -5 -15   14.65    2.18
   8  -5 -16    2.15    0.95
   8  -5 -17   80.41    4.20
   8  -5 -18   33.58    2.47
   8  -5 -19    8.36    1.13
   8   6 -17   16.49    1.70
   8   6 -16   13.59    1.84
   8   6 -15   48.63    3.71
  -8  -6 -14   74.18    5.34
  -8  -6 -13   36.26    3.98
  -8  -6 -12   30.67    3.91
  -8   6  11  195.90    9.90
  -8  -6 -11  187.27   10.04
  -8   6  10   96.21    7.01
  -8  -6 -10  105.83    7.71
  -8   6   9   91.66    6.89
  -8  -6  -9  105.19    7.87
  -8   6   8   57.17    5.53
  -8  -6  -8   54.88    5.87
  -8   6   7  255.79   11.78
  -8  -6  -7  254.05   12.85
  -8   6   6  544.00   17.73
  -8  -6  -6  557.97   19.52
  -8   6   5  104.36    7.43
  -8  -6  -5  115.09    8.81
  -8   6   4  274.94   12.14
  -8  -6  -4  270.55   13.66
  -8   6   3   79.94    6.38
  -8  -6  -3   84.11    7.59
  -8   6   2   31.38    4.00
   8  -6   2   43.58    5.02
  -8  -6  -2   32.37    4.92
  -8   6   1  247.57   11.14
   8  -6   1  270.06   12.32
  -8  -6  -1  259.84   13.52
  -8  -6   0    0.73    1.34
  -8   6   0    0.57    1.01
   8  -6   0    1.38    1.79
  -8   6  -1  270.00   11.15
   8  -6  -1  259.08   12.23
  -8  -6   2   28.39    4.37
  -8   6  -2   32.50    3.77
  -8  -6   3   76.57    6.96
   8  -6  -7  240.66    9.47
   8  -6  -8   54.88    4.43
   8  -6  -9   90.12    5.66
   8  -6 -10  100.59    5.92
   8  -6 -11  175.44    7.80
   8  -6 -12   29.46    3.17
   8  -6 -13   33.18    3.26
   8  -6 -14   62.42    4.19
   8  -6 -15   50.37    3.59
   8  -6 -16   14.08    1.79
   8  -6 -17   16.02    1.79
   8  -6 -18   10.91    1.37
   8  -6 -19   68.31    2.95
   8   7 -16   39.35    2.73
   8   7 -15   42.06    3.16
  -8  -7 -14   42.06    3.90
  -8  -7 -13  134.98    7.58
  -8  -7 -12  121.85    7.61
  -8  -7 -11   12.94    2.87
  -8  -7 -10    4.47    2.00
  -8   7  10    4.70    2.06
  -8   7   9  145.49    8.66
  -8  -7  -9  143.55    9.15
  -8   7   8   53.55    5.35
  -8  -7  -8   47.91    5.46
  -8   7   7  152.38    8.91
  -8  -7  -7  145.00    9.57
  -8  -7  -6   15.41    3.35
  -8   7   6   17.71    3.16
  -8  -7  -5   26.59    4.36
  -8   7   5   26.16    3.78
  -8  -7  -4    2.00    1.56
  -8   7   4    8.25    2.28
  -8   7   3  233.00   10.96
  -8  -7  -3  249.31   13.21
  -8   7   2  116.97    7.65
  -8  -7  -2  123.34    9.40
  -8   7   1  149.24    8.50
  -8  -7  -1  142.14   10.04
  -8   7   0   79.83    6.07
  -8  -7   0   75.26    7.32
  -8   7  -1  156.08    8.33
  -8  -7   1  139.41    9.88
  -8   7  -2  140.40    7.64
  -8  -7   2  110.71    8.67
  -8  -7   3  210.73   11.69
   8  -7  -8   55.46    4.27
   8  -7  -9  140.39    6.83
   8  -7 -10    2.85    1.13
   8  -7 -11   16.88    2.33
   8  -7 -12  105.82    5.56
   8  -7 -13  126.05    5.89
   8  -7 -14   33.46    2.93
   8  -7 -15   42.74    3.10
   8  -7 -16   41.98    2.87
   8  -7 -17   10.81    1.42
   8  -7 -18   32.83    2.13
   8   8 -15   24.44    2.22
  -8  -8 -14   18.54    2.50
  -8  -8 -13  104.50    6.40
  -8  -8 -12   17.43    2.83
  -8  -8 -11   17.55    3.06
  -8  -8 -10   79.84    6.51
  -8  -8  -9    5.91    2.07
  -8  -8  -8   15.35    3.09
  -8   8   7  176.20    9.53
  -8  -8  -7  162.94   10.14
  -8   8   6  107.56    7.43
  -8  -8  -6  102.76    8.22
  -8   8   5   40.06    4.69
  -8  -8  -5   37.89    5.05
  -8   8   4  106.11    7.35
  -8  -8  -4  102.45    8.37
  -8   8   3  221.79   10.59
  -8  -8  -3  233.35   12.78
  -8  -8  -2   27.50    4.58
  -8   8   2   27.60    3.76
  -8   8   1   57.07    5.25
  -8  -8  -1   58.20    6.57
  -8  -8   0    1.10    1.53
  -8   8   0    4.16    1.82
  -8   8  -1   61.85    5.21
  -8  -8   1   46.68    5.69
  -8  -8   2   22.68    4.07
  -8  -8   3  202.36   11.51
   8  -8  -9    8.66    1.68
   8  -8 -10   74.09    4.59
   8  -8 -11   18.94    2.31
   8  -8 -12   17.44    2.19
   8  -8 -13   91.77    4.72
   8  -8 -14   17.97    2.01
   8  -8 -15   22.81    2.13
   8  -8 -16   49.62    2.89
   8  -8 -17   11.13    1.31
   8   9 -14   87.02    4.22
  -8  -9 -14   97.94    5.26
  -8  -9 -13   34.58    3.59
  -8  -9 -12   43.78    4.24
  -8  -9 -11   63.74    5.39
  -8  -9 -10   16.27    2.90
  -8  -9  -9   47.59    5.01
  -8  -9  -8  143.94    9.06
  -8  -9  -7   24.87    3.91
  -8  -9  -6  122.71    8.78
  -8  -9  -5  175.76   10.72
  -8  -9  -4   47.39    5.65
  -8  -9  -3   51.25    5.89
  -8  -9  -2   66.09    6.81
  -8  -9  -1    8.84    2.85
  -8  -9   0  324.24   15.28
  -8  -9   1    6.37    2.44
  -8  -9   2   58.42    6.29
  -8  -9   3   36.35    4.85
   8  -9 -10   16.58    2.07
   8  -9 -11   59.91    3.76
   8  -9 -12   41.58    3.05
   8  -9 -13   31.57    2.52
   8  -9 -14   88.93    4.08
   8  -9 -15   50.17    2.88
   8  -9 -16   20.38    1.74
  -8  10  15   79.74    3.71
  -8 -10 -13   72.50    4.73
  -8 -10 -12   60.13    4.70
  -8 -10 -11   10.81    2.24
  -8 -10 -10   25.96    3.53
  -8 -10  -9   16.35    2.92
  -8 -10  -8  115.40    7.90
  -8 -10  -7   24.13    3.84
  -8 -10  -6   39.79    4.86
  -8 -10  -5   27.63    4.21
  -8 -10  -4  112.48    8.48
  -8 -10  -3   80.97    7.39
  -8 -10  -2  385.10   16.28
  -8 -10  -1    5.50    2.20
  -8 -10   0   39.77    5.28
  -8 -10   1    4.67    2.40
  -8 -10   2  352.89   15.43
  -8 -10   3   65.21    6.33
  -8 -10   4  100.13    7.62
   8 -10 -12   50.39    3.06
   8 -10 -13   64.30    3.32
   8 -10 -14   19.93    1.79
   8 -10 -15   61.24    2.88
  -8  11  14   26.29    2.22
  -8 -11 -13    1.64    0.96
  -8 -11 -12   80.06    5.09
  -8 -11 -11  107.31    6.41
  -8 -11 -10   56.19    4.81
  -8 -11  -9    6.16    1.85
  -8 -11  -8   23.78    3.62
  -8 -11  -7  119.98    8.02
  -8 -11  -6   57.62    5.65
  -8 -11  -5   96.24    7.44
  -8 -11  -4   68.01    6.45
  -8 -11  -3    9.55    2.74
  -8 -11  -2  139.13    9.41
  -8 -11  -1   50.77    5.69
  -8 -11   0   16.93    3.52
  -8 -11   1   53.90    5.84
  -8 -11   2  135.37    9.11
  -8 -11   3    4.05    1.94
  -8 -11   4   54.33    5.43
  -8  12  13   12.74    1.61
  -8 -12 -12    7.37    1.52
  -8 -12 -11   11.34    2.03
  -8 -12 -10   36.68    3.71
  -8 -12  -9   23.44    3.23
  -8 -12  -8   20.52    3.07
  -8 -12  -7   84.19    6.53
  -8 -12  -6  117.71    7.77
  -8 -12  -5   11.85    2.77
  -8 -12  -4  105.29    7.67
  -8 -12  -3   25.08    3.80
  -8 -12  -2   95.79    7.48
  -8 -12  -1   22.18    3.60
  -8 -12   0   21.43    3.61
  -8 -12   1   21.14    3.68
  -8 -12   2   82.31    6.81
  -8 -12   3   21.21    3.51
  -8 -12   4   87.83    6.63
  -8  13  12  123.95    4.76
  -8 -13 -11    3.79    1.20
  -8  13  11    3.93    1.23
  -8 -13 -10   83.92    5.09
  -8 -13  -9   69.81    4.97
  -8 -13  -8   44.24    4.18
  -8 -13  -7    8.62    2.15
  -8 -13  -6   60.03    5.28
  -8 -13  -5    1.57    1.07
  -8 -13  -4    4.04    1.65
  -8 -13  -3   49.86    5.05
  -8 -13  -2   67.74    5.90
  -8 -13  -1   99.62    7.24
  -8 -13   0  103.82    7.39
  -8 -13   1   94.14    7.06
  -8 -13   2   61.73    5.58
  -8 -13   3   45.38    4.65
  -8 -13   4    3.61    1.51
  -8  14  11   45.72    2.73
  -8  14  10   61.70    3.38
  -8 -14 -10   50.83    3.52
  -8  14   9   55.20    3.37
  -8 -14  -9   44.93    3.63
  -8  14   8   44.14    3.12
  -8 -14  -8   37.20    3.49
  -8 -14  -7    5.03    1.38
  -8 -14  -6   74.70    5.38
  -8 -14  -5    5.10    1.61
  -8 -14  -4  107.95    6.85
  -8 -14  -3    3.36    1.59
  -8 -14  -2   44.45    4.49
  -8  14   1   54.85    3.48
  -8 -14  -1   49.29    4.78
  -8 -14   0   64.66    5.45
  -8 -14   1   40.70    4.32
  -8 -14   2   41.19    4.28
  -8 -14   3    5.07    1.65
  -8  15  10   63.77    3.00
  -8  15   9   25.84    2.07
  -8 -15  -9   18.55    2.06
  -8  15   8   75.22    3.67
  -8 -15  -8   65.38    4.11
  -8  15   7   18.14    1.91
  -8 -15  -7   16.96    2.23
  -8 -15  -6   -0.73    1.01
  -8  15   6    0.87    0.81
  -8 -15  -5    3.50    1.21
  -8  15   5    4.22    1.11
  -8 -15  -4    8.75    1.98
  -8  15   4   11.04    1.59
  -8 -15  -3    5.86    1.63
  -8  15   3    4.92    1.08
  -8  15   2   41.37    2.77
  -8 -15  -2   34.65    3.64
  -8 -15  -1   30.98    3.50
  -8 -15   0   35.62    3.68
  -8 -15   1   31.96    3.49
  -8 -15   2   29.65    3.30
  -8 -15   3    4.36    1.33
  -8 -16  -7   10.13    1.53
  -8  16   7   11.39    1.34
  -8  16   6   17.71    1.64
  -8 -16  -6   16.99    2.04
  -8 -16  -5    6.02    1.33
  -8  16   5    4.97    0.99
  -8  16   4   26.89    2.03
  -8 -16  -4   27.51    2.80
  -8 -16  -3    0.32    0.77
  -8  16   3    1.74    0.76
  -8 -16  -2    6.95    1.57
  -8 -16  -1   42.95    3.61
  -8 -16   0    9.95    1.76
  -8 -16   1   40.85    3.42
  -8 -16   2    9.61    1.68
  -8 -17  -3    3.26    0.92
  -8 -17  -2   53.61    3.39
  -9   0   0   -0.93    1.32
  -9   0  -1   32.15    4.26
  -9   0   1   36.55    4.51
  -9   0   2  502.85   17.15
  -9   0  -2  547.90   18.77
  -9   0  -3    3.06    1.95
  -9   0  -4    7.53    2.14
  -9   0  -5    7.71    2.37
  -9   0  -6    0.36    1.66
  -9   0  -7   19.98    3.44
  -9   0  -8   18.11    3.31
  -9   0   9   53.16    5.33
  -9   0  -9   62.82    5.90
  -9   0  10   98.55    7.16
  -9   0 -10  111.91    7.65
  -9   0  11   28.70    3.78
  -9   0 -11   36.65    4.29
   9   0 -12  132.46    7.05
  -9   0  12  123.05    7.40
   9   0 -13   41.02    3.85
  -9   0  13   44.64    4.21
   9   0 -14   10.06    1.89
  -9   0  14    9.98    1.97
   9   0 -15   65.01    4.28
   9   0 -16    2.29    1.01
   9   0 -17    3.20    0.94
   9   0 -18   10.70    1.27
   9   1 -18   40.29    2.36
   9   1 -17   12.24    1.60
   9   1 -16   33.05    2.85
   9   1 -15   22.83    2.57
   9   1 -14    4.13    1.24
  -9   1  14    4.28    1.38
   9   1 -13   63.55    4.70
  -9   1  13   67.12    5.21
   9   1 -12   38.68    3.81
  -9   1  12   41.11    4.28
  -9  -1 -12   52.58    4.93
  -9   1  11   24.03    3.54
  -9  -1 -11   29.50    3.87
  -9   1  10  131.30    8.24
  -9  -1 -10  160.24    9.22
  -9   1   9   74.01    6.35
  -9  -1  -9   89.23    7.12
  -9   1   8  219.64   11.00
  -9  -1  -8  230.07   11.56
  -9  -1  -7   33.48    4.44
  -9  -1  -6  456.42   17.04
  -9  -1  -5   36.64    4.77
  -9  -1  -4  230.35   11.96
  -9  -1  -3  309.30   14.07
  -9   1   2   24.29    3.62
  -9  -1  -2   30.89    4.44
  -9   1   1  153.54    9.21
  -9  -1  -1  145.49    9.41
  -9   1   0   77.25    6.69
  -9  -1   0   78.07    6.69
  -9   1  -1  146.76    9.26
  -9  -1   1  136.96    8.83
  -9   1  -2   29.55    4.22
  -9  -1   2   26.60    3.84
  -9   1  -3  299.17   13.65
  -9   1  -4  234.80   11.94
  -9   1  -5   33.41    4.53
  -9   1  -6  436.83   16.55
  -9   1  -7   28.36    4.11
  -9   1  -8  232.29   11.71
  -9   1  -9   84.80    6.85
  -9  -1  10  123.52    8.00
   9  -1 -11   26.23    3.19
  -9  -1  11   17.02    2.85
   9  -1 -12   44.05    3.97
  -9  -1  12   36.07    3.96
   9  -1 -13   62.93    4.59
  -9  -1  13   59.17    4.88
   9  -1 -14    3.26    1.02
  -9  -1  14    3.16    1.16
   9  -1 -15   20.22    2.43
   9  -1 -16   31.25    2.70
   9  -1 -17   10.25    1.48
   9  -1 -18   43.53    2.51
   9   2 -18   32.63    2.04
   9   2 -17   13.40    1.64
   9   2 -16   39.04    2.98
   9   2 -15   29.71    2.92
   9   2 -14   36.31    3.44
  -9   2  14   34.54    3.52
   9   2 -13    3.58    1.23
  -9   2  13    6.31    1.88
  -9  -2 -12   10.73    2.34
  -9   2  12    6.61    1.92
  -9   2  11   35.35    4.07
  -9  -2 -11   35.21    4.21
  -9  -2 -10    6.38    2.12
  -9   2  10    6.03    1.94
  -9  -2  -9   10.13    2.49
  -9   2   9    9.36    2.35
  -9   2   8   66.99    6.05
  -9  -2  -8   73.21    6.41
  -9   2   7  144.53    8.99
  -9  -2  -7  155.58    9.76
  -9   2   6  138.68    8.71
  -9  -2  -6  136.88    9.10
  -9  -2  -5  258.66   12.75
  -9  -2  -4   86.36    7.36
  -9  -2  -3   85.14    7.34
  -9  -2  -2  342.33   14.92
  -9  -2  -1  106.53    8.22
  -9   2   0   12.19    2.73
  -9  -2   0   13.78    3.04
  -9   2  -1  104.43    7.78
  -9  -2   1  107.60    7.96
  -9   2  -2  340.37   14.45
  -9  -2   2  336.93   13.99
  -9   2  -3   85.94    7.22
  -9   2  -4   80.29    6.87
  -9   2  -5  234.25   11.94
  -9   2  -6  141.13    9.17
  -9   2  -7  159.95    9.67
   9  -2 -10    7.44    1.66
   9  -2 -11   35.61    3.62
  -9  -2  11   31.37    3.99
   9  -2 -12    7.92    1.80
  -9  -2  12    6.04    1.89
   9  -2 -13    4.33    1.30
  -9  -2  13    5.72    1.71
   9  -2 -14   34.28    3.17
   9  -2 -15   26.91    2.67
   9  -2 -16   35.20    2.82
   9  -2 -17   13.98    1.61
   9  -2 -18   41.05    2.39
   9   3 -17   49.43    2.89
   9   3 -16   91.65    4.50
   9   3 -15    7.64    1.51
   9   3 -14   51.30    3.95
  -9  -3 -13    9.75    2.01
   9   3 -13    8.16    1.69
  -9   3  13   11.33    2.20
  -9   3  12  150.50    8.12
  -9  -3 -12  169.43    8.69
  -9  -3 -11   22.07    3.37
  -9   3  11   19.66    3.14
  -9   3  10   26.17    3.68
  -9  -3 -10   28.33    3.93
  -9   3   9   26.15    3.81
  -9  -3  -9   28.66    4.05
  -9   3   8  136.93    8.57
  -9  -3  -8  145.90    9.18
  -9   3   7   40.36    4.71
  -9  -3  -7   42.18    5.24
  -9   3   6  181.58   10.04
  -9  -3  -6  183.05   10.64
  -9  -3  -5   24.92    4.07
  -9   3   5   19.86    3.34
  -9   3   4   31.57    4.20
  -9  -3  -4   38.32    5.02
  -9   3   3  202.54   10.48
  -9  -3  -3  208.38   11.61
  -9   3   2  181.25    9.78
  -9  -3  -2  169.51   10.49
  -9   3   1  701.53   19.87
  -9  -3  -1  656.08   21.51
  -9  -3   0   13.56    3.18
  -9   3   0   12.96    2.67
  -9   3  -1  725.62   19.57
  -9  -3   1  653.99   20.89
  -9   3  -2  182.50    9.04
  -9  -3   2  163.33    9.76
  -9   3  -3  222.40    9.78
   9  -3  -8  123.64    6.68
   9  -3  -9   23.76    2.98
   9  -3 -10   23.74    2.91
   9  -3 -11   16.21    2.45
   9  -3 -12  148.08    6.96
  -9  -3  12  126.83    7.55
   9  -3 -13   11.72    1.94
  -9  -3  13    9.29    1.88
   9  -3 -14   55.10    3.92
   9  -3 -15    6.85    1.48
   9  -3 -16   89.89    4.33
   9  -3 -17   49.72    2.92
   9  -3 -18   26.30    1.84
   9   4 -17   20.90    1.77
   9   4 -16   56.28    3.37
   9   4 -15   93.25    4.83
   9   4 -14   43.12    3.55
  -9  -4 -13   43.16    4.08
  -9  -4 -12   14.65    2.61
  -9   4  12   16.59    2.84
  -9   4  11   26.54    3.48
  -9  -4 -11   27.44    3.67
  -9   4  10   38.28    4.33
  -9  -4 -10   36.08    4.40
  -9   4   9   46.61    4.86
  -9  -4  -9   56.27    5.60
  -9  -4  -8   19.09    3.38
  -9   4   8   19.39    3.31
  -9   4   7  302.10   12.82
  -9  -4  -7  307.32   13.66
  -9  -4  -6   19.31    3.69
  -9   4   6   21.42    3.43
  -9   4   5  285.76   12.52
  -9  -4  -5  303.10   14.02
  -9   4   4   57.74    5.57
  -9  -4  -4   70.60    6.74
  -9  -4  -3   15.19    3.30
  -9   4   3   17.43    3.09
  -9  -4  -2    3.41    1.73
  -9   4   2    2.35    1.58
  -9   4   1   61.56    5.52
  -9  -4  -1   66.25    6.68
  -9   4   0   47.73    4.81
  -9  -4   0   48.51    5.63
  -9   4  -1   68.69    5.59
  -9  -4   1   55.19    5.81
  -9  -4   2    3.20    1.61
  -9   4  -2    3.69    1.54
   9  -4  -5  266.81    9.66
   9  -4  -6   18.94    2.49
   9  -4  -7  283.04   10.13
   9  -4  -8   18.11    2.52
   9  -4  -9   43.96    3.88
   9  -4 -10   30.42    3.23
   9  -4 -11   24.26    2.80
   9  -4 -12   13.53    2.09
  -9  -4  12   12.47    2.40
   9  -4 -13   38.89    3.32
  -9  -4  13   39.12    3.68
   9  -4 -14   43.21    3.30
   9  -4 -15   84.42    4.36
   9  -4 -16   52.85    3.16
   9  -4 -17   20.07    1.76
   9   5 -16   28.45    2.29
   9   5 -15   17.76    2.02
   9   5 -14   38.23    3.22
  -9  -5 -14   42.84    3.61
  -9  -5 -13  109.14    6.36
  -9  -5 -12   26.63    3.40
  -9  -5 -11   12.95    2.57
  -9   5  11   18.98    3.03
  -9  -5 -10    9.56    2.46
  -9   5  10    9.71    2.26
  -9  -5  -9   19.77    3.36
  -9   5   9   27.59    3.78
  -9  -5  -8   21.85    3.64
  -9   5   8   27.00    3.86
  -9  -5  -7   23.62    3.89
  -9   5   7   20.41    3.28
  -9  -5  -6   26.59    4.18
  -9   5   6   26.87    3.81
  -9   5   5  130.14    8.21
  -9  -5  -5  125.97    9.00
  -9   5   4   33.94    4.11
  -9  -5  -4   30.06    4.62
  -9   5   3  176.55    9.51
  -9  -5  -3  164.86   10.45
  -9  -5  -2   12.50    3.03
  -9   5   2   13.77    2.79
  -9   5   1  157.91    8.74
  -9  -5  -1  141.97    9.76
  -9   5   0   66.87    5.60
  -9  -5   0   68.15    6.66
  -9   5  -1  153.44    8.24
  -9  -5   1  133.66    9.20
  -9  -5   2   12.74    3.22
  -9   5  -2   14.56    2.58
  -9  -5   3  143.02    8.95
   9  -5  -7   16.22    2.35
   9  -5  -8   23.39    2.72
   9  -5  -9   20.05    2.55
   9  -5 -10    7.66    1.51
   9  -5 -11   11.13    1.88
   9  -5 -12   26.56    2.70
  -9  -5  12   20.15    2.92
   9  -5 -13   95.67    4.92
   9  -5 -14   34.43    2.78
   9  -5 -15   18.13    1.90
   9  -5 -16   27.14    2.15
   9  -5 -17   67.83    3.02
   9   6 -16   23.88    1.86
   9   6 -15   80.38    3.99
   9   6 -14   28.36    2.63
  -9  -6 -14   33.28    3.03
  -9  -6 -13   28.82    3.14
  -9  -6 -12    3.71    1.46
  -9  -6 -11   73.46    5.67
  -9  -6 -10   15.36    2.81
  -9   6  10   15.64    2.83
  -9   6   9   42.84    4.53
  -9  -6  -9   38.77    4.55
  -9   6   8   35.55    4.25
  -9  -6  -8   37.66    4.64
  -9   6   7  104.42    7.19
  -9  -6  -7  102.38    7.64
  -9   6   6  138.48    8.37
  -9  -6  -6  147.22    9.58
  -9   6   5  163.99    9.20
  -9  -6  -5  174.40   10.49
  -9   6   4  124.28    7.93
  -9  -6  -4  126.66    9.01
  -9   6   3   71.12    5.87
  -9  -6  -3   66.94    6.62
  -9  -6  -2    7.89    2.71
  -9   6   2    7.51    2.13
  -9   6   1   73.29    5.87
  -9  -6  -1   75.47    7.05
  -9   6   0   38.66    4.27
  -9  -6   0   33.96    4.74
  -9   6  -1   82.53    5.93
  -9  -6   1   64.89    6.35
  -9  -6   2    5.26    1.99
  -9   6  -2    6.99    1.97
  -9  -6   3   55.74    5.54
   9  -6  -8   31.37    3.08
   9  -6  -9   36.58    3.26
   9  -6 -10   12.77    1.89
   9  -6 -11   58.07    3.84
   9  -6 -12    4.06    1.10
  -9  -6  12    1.17    0.93
   9  -6 -13   23.08    2.23
   9  -6 -14   29.13    2.40
   9  -6 -15   75.74    3.61
   9  -6 -16   22.58    1.81
   9   7 -15   30.38    2.24
   9   7 -14   33.59    2.66
  -9  -7 -14   32.82    2.87
  -9  -7 -13   36.66    3.37
  -9  -7 -12   13.93    2.30
  -9  -7 -11   11.02    2.17
  -9  -7 -10   25.48    3.43
  -9  -7  -9  152.01    8.78
  -9  -7  -8   21.47    3.44
  -9   7   8   25.09    3.56
  -9   7   7   77.85    6.11
  -9  -7  -7   75.91    6.61
  -9  -7  -6   17.28    3.37
  -9   7   6   20.20    3.24
  -9   7   5   91.14    6.70
  -9  -7  -5   96.78    7.72
  -9   7   4  157.21    8.78
  -9  -7  -4  161.55   10.20
  -9   7   3   59.53    5.36
  -9  -7  -3   52.81    5.91
  -9  -7  -2   18.88    3.62
  -9   7   2   20.86    3.19
  -9   7   1  233.37   10.34
  -9  -7  -1  222.59   12.19
  -9  -7   0    2.19    1.80
  -9   7   0    2.79    1.46
  -9   7  -1  248.60   10.14
  -9  -7   1  210.76   11.58
  -9  -7   2   14.96    3.15
  -9  -7   3   46.38    5.13
   9  -7  -9  150.83    6.14
   9  -7 -10   24.05    2.37
   9  -7 -11   12.64    1.70
   9  -7 -12   13.97    1.74
   9  -7 -13   30.46    2.39
   9  -7 -14   28.08    2.12
   9  -7 -15   28.33    2.03
   9   8 -14   64.46    3.33
  -9  -8 -14   70.57    3.81
  -9  -8 -13    5.21    1.39
  -9  -8 -12   71.64    4.84
  -9  -8 -11    3.97    1.46
  -9  -8 -10   18.17    2.84
  -9  -8  -9   25.58    3.50
  -9  -8  -8   27.08    3.74
  -9  -8  -7   20.39    3.48
  -9  -8  -6   78.36    6.73
  -9  -8  -5   10.74    2.77
  -9   8   5   10.20    2.58
  -9   8   4  117.00    7.38
  -9  -8  -4  105.72    8.10
  -9   8   3   61.96    5.37
  -9  -8  -3   54.96    5.95
  -9   8   2   52.38    4.85
  -9  -8  -2   46.47    5.53
  -9  -8  -1   26.90    4.37
  -9   8   1   28.78    3.59
  -9   8   0   49.74    4.54
  -9  -8   0   38.99    5.03
  -9  -8   1   21.43    3.72
  -9  -8   2   37.65    4.72
  -9  -8   3   54.26    5.48
   9  -8 -11    3.90    0.99
   9  -8 -12   67.32    3.38
   9  -8 -13    5.54    0.99
   9  -8 -14   64.60    2.93
  -9  -9 -13   11.98    1.74
   9   9 -13    8.02    1.30
  -9  -9 -12   62.10    4.27
  -9  -9 -11   12.54    2.13
  -9  -9 -10  106.05    6.46
  -9  -9  -9  106.44    6.78
  -9  -9  -8   59.35    5.33
  -9  -9  -7   58.90    5.43
  -9  -9  -6  150.16    8.96
  -9  -9  -5   37.40    4.61
  -9  -9  -4   53.39    5.63
  -9  -9  -3   21.74    3.72
  -9  -9  -2    2.01    1.63
  -9  -9  -1   38.39    4.85
  -9  -9   0   74.03    6.70
  -9  -9   1   42.25    5.00
  -9  -9   2    2.61    1.30
  -9  -9   3   21.18    3.38
  -9 -10 -12   47.37    3.41
  -9 -10 -11    7.20    1.60
  -9 -10 -10   64.66    4.76
  -9 -10  -9    3.10    1.42
  -9 -10  -8   48.10    4.52
  -9 -10  -7   12.99    2.57
  -9 -10  -6   18.10    3.06
  -9 -10  -5   12.65    2.70
  -9 -10  -4    7.08    2.03
  -9 -10  -3    2.84    1.62
  -9 -10  -2   32.31    4.31
  -9 -10  -1   33.57    4.37
  -9 -10   0   22.91    3.61
  -9 -10   1   35.05    4.36
  -9 -10   2   30.23    3.94
  -9 -10   3    2.15    1.23
  -9 -11 -12    3.11    0.93
  -9 -11 -11    6.15    1.33
  -9 -11 -10  201.93    7.84
  -9 -11  -9   69.46    4.81
  -9 -11  -8  200.62    8.79
  -9 -11  -7   44.61    4.24
  -9 -11  -6   28.83    3.58
  -9 -11  -5   35.29    3.97
  -9 -11  -4   22.86    3.35
  -9 -11  -3    7.71    2.32
  -9 -11  -2    0.67    1.30
  -9 -11  -1   41.72    4.64
  -9 -11   0   80.91    6.41
  -9 -11   1   36.50    4.22
  -9 -11   2    2.23    1.35
  -9 -11   3    3.41    1.40
  -9 -12 -11   97.09    4.38
  -9 -12 -10   57.34    3.74
  -9 -12  -9   21.17    2.47
  -9 -12  -8    3.32    1.21
  -9 -12  -7  199.34    8.44
  -9 -12  -6   55.56    4.56
  -9 -12  -5    5.10    1.53
  -9 -12  -4    8.90    2.06
  -9 -12  -3    6.33    1.81
  -9 -12  -2    5.86    1.75
  -9 -12  -1   46.49    4.53
  -9 -12   0   42.22    4.36
  -9 -12   1   44.91    4.41
  -9 -12   2    6.27    1.74
  -9 -12   3    7.72    1.81
  -9  13  10   18.73    1.63
  -9  13   9   59.87    3.15
  -9 -13  -9   47.13    3.28
  -9 -13  -8   14.84    2.03
  -9 -13  -7   22.58    2.61
  -9 -13  -6   96.28    5.53
  -9 -13  -5   13.43    2.24
  -9 -13  -4    8.10    1.84
  -9 -13  -3    9.27    1.94
  -9 -13  -2   16.53    2.57
  -9 -13  -1   85.38    5.70
  -9 -13   0   37.18    3.85
  -9 -13   1   86.19    5.55
  -9 -13   2   14.45    2.26
  -9  14   8   55.95    2.75
  -9 -14  -8   47.25    3.06
  -9  14   7   33.78    2.24
  -9 -14  -7   26.95    2.51
  -9 -14  -6    8.56    1.60
  -9  14   6    9.79    1.31
  -9  14   5   44.43    2.66
  -9 -14  -5   37.35    3.23
  -9 -14  -4    3.58    1.21
  -9  14   4    3.15    0.87
  -9  14   3   24.54    1.97
  -9 -14  -3   21.93    2.58
  -9 -14  -2   24.23    2.74
  -9 -14  -1    0.93    0.86
  -9 -14   0   18.67    2.40
  -9 -14   1    0.86    0.83
  -9 -14   2   20.63    2.32
  -9 -15  -5    5.64    1.16
  -9 -15  -4   22.74    2.23
  -9 -15  -3   90.55    4.58
  -9 -15  -2    2.61    0.97
  -9 -15  -1    7.55    1.38
  -9 -15   0    0.79    0.65
 -10   0   0   24.11    3.73
 -10   0   1  325.04   13.19
 -10   0  -1  321.76   13.64
 -10   0  -2  168.91    9.79
 -10   0  -3   97.16    7.44
 -10   0  -4   11.73    2.72
 -10   0  -5  159.74    9.46
 -10   0  -6   19.34    3.30
 -10   0  -7    4.00    1.78
 -10   0   7    2.91    1.13
 -10   0   8    6.50    1.99
 -10   0   9    1.95    1.18
  10   0 -10   24.85    2.82
 -10   0  10   25.82    3.21
  10   0 -11    4.82    1.28
 -10   0  11    4.91    1.48
  10   0 -12   20.68    2.39
 -10   0  12   20.82    2.67
  10   0 -13    3.69    1.14
 -10   0  13    5.10    1.34
  10   0 -14   27.97    2.45
  10   0 -15   43.16    2.76
  10   0 -16    3.92    0.84
  10   1 -16   89.73    3.49
  10   1 -15   72.58    3.57
  10   1 -14   16.86    1.93
  10   1 -13   21.78    2.35
 -10   1  13   23.15    2.58
  10   1 -12   37.83    3.28
 -10   1  12   39.16    3.60
  10   1 -11   61.47    4.28
 -10   1  11   51.31    4.38
 -10   1  10   24.86    3.28
 -10   1   9  236.71   10.39
 -10  -1  -9  277.19   11.39
 -10  -1  -8   13.90    2.77
 -10   1   8   10.41    2.39
 -10   1   7   95.95    6.93
 -10  -1  -7  112.44    7.60
 -10   1   6  112.00    7.53
 -10  -1  -6  135.07    8.53
 -10  -1  -5   23.22    3.63
 -10   1   5   20.55    3.34
 -10   1   4   69.41    5.88
 -10  -1  -4   73.58    6.51
 -10  -1  -3   95.69    7.46
 -10  -1  -2  121.66    8.39
 -10  -1  -1   50.40    5.35
 -10  -1   0   14.63    3.10
 -10  -1   1   48.83    5.05
 -10  -1   2  114.84    7.53
 -10   1  -3  110.47    6.60
 -10  -1   8    8.11    2.10
  10  -1  -9  234.55    8.75
 -10  -1   9  205.59    9.79
  10  -1 -10   22.83    2.65
 -10  -1  10   20.38    2.86
  10  -1 -11   55.56    3.98
 -10  -1  11   51.67    4.40
  10  -1 -12   40.21    3.23
 -10  -1  12   33.48    3.32
  10  -1 -13   21.55    2.25
 -10  -1  13   20.53    2.41
  10  -1 -14   18.70    1.99
  10  -1 -15   68.48    3.41
  10  -1 -16   87.72    3.41
  10   2 -15    8.40    1.28
  10   2 -14   59.24    3.56
  10   2 -13   56.01    3.74
  10   2 -12   20.83    2.39
 -10   2  12   19.91    2.65
  10   2 -11   50.13    3.87
 -10   2  11   48.21    4.22
 -10   2  10   23.09    3.12
 -10  -2 -10   24.03    3.37
 -10   2   9  112.18    6.96
 -10  -2  -9  125.36    7.70
 -10   2   8   31.50    3.90
 -10  -2  -8   35.20    4.24
 -10   2   7   43.49    4.64
 -10  -2  -7   47.02    5.00
 -10  -2  -6   24.88    3.74
 -10   2   6   25.80    3.61
 -10   2   5   95.51    7.02
 -10  -2  -5   96.23    7.39
 -10   2   4  154.98    8.88
 -10  -2  -4  161.89    9.71
 -10   2   3   36.06    4.33
 -10  -2  -3   36.30    4.63
 -10   2   2  180.98    9.52
 -10  -2  -2  187.47   10.52
 -10   2   1  110.47    7.28
 -10  -2  -1   98.12    7.47
 -10   2   0   92.73    6.49
 -10  -2   0   90.43    7.06
 -10   2  -1  113.93    7.03
 -10  -2   1   90.07    6.95
 -10   2  -2  189.48    8.88
 -10  -2   2  172.73    9.32
 -10   2  -3   36.37    3.73
  10  -2  -7   41.39    3.59
  10  -2  -8   32.60    3.20
  10  -2  -9  106.95    5.65
 -10  -2   9   93.38    6.43
  10  -2 -10   20.46    2.42
 -10  -2  10   18.67    2.81
  10  -2 -11   46.59    3.53
 -10  -2  11   49.18    4.28
  10  -2 -12   21.40    2.32
 -10  -2  12   19.18    2.57
  10  -2 -13   54.82    3.49
 -10  -2  13   59.51    3.99
  10  -2 -14   59.08    3.36
  10  -2 -15    8.69    1.22
  10   3 -15   50.96    2.86
  10   3 -14    7.54    1.28
  10   3 -13   69.22    4.06
  10   3 -12   20.31    2.33
 -10   3  12   19.75    2.57
 -10  -3 -11    8.39    1.90
 -10   3  11    9.63    1.95
 -10  -3 -10   13.21    2.39
 -10   3  10   11.07    2.20
 -10   3   9  197.20    9.20
 -10  -3  -9  222.80   10.11
 -10   3   8   50.53    4.80
 -10  -3  -8   54.50    5.19
 -10   3   7   33.43    4.00
 -10  -3  -7   37.55    4.46
 -10   3   6   94.37    6.79
 -10  -3  -6  106.51    7.57
 -10   3   5  192.82    9.72
 -10  -3  -5  183.02   10.17
 -10   3   4  138.31    8.28
 -10  -3  -4  152.72    9.42
 -10   3   3  267.32   11.55
 -10  -3  -3  255.68   12.33
 -10   3   2   82.60    6.28
 -10  -3  -2   73.46    6.52
 -10   3   1   74.56    5.88
 -10  -3  -1   70.43    6.44
 -10  -3   0    4.36    1.52
 -10   3   0    1.09    1.23
 -10   3  -1   69.85    5.41
 -10  -3   1   65.22    5.90
 -10   3  -2   83.91    5.67
 -10  -3   2   64.04    5.66
  10  -3  -5  166.65    6.96
  10  -3  -6   88.57    5.05
  10  -3  -7   28.61    2.83
  10  -3  -8   49.78    3.77
  10  -3  -9  186.70    7.26
  10  -3 -10   10.85    1.81
 -10  -3  10    8.69    1.97
  10  -3 -11    9.64    1.56
 -10  -3  11    5.08    1.54
  10  -3 -12   19.02    2.12
 -10  -3  12   15.75    2.30
 -10  -3  13   69.18    4.20
  10  -3 -13   61.00    3.48
  10  -3 -14    7.61    1.22
  10  -3 -15   47.65    2.59
  10   4 -15    5.70    0.97
  10   4 -14   31.09    2.45
  10   4 -13   14.38    1.85
  10   4 -12   39.38    3.20
 -10   4  11   25.07    3.00
 -10  -4 -11   29.40    3.23
 -10   4  10   32.98    3.54
 -10  -4 -10   26.11    3.27
 -10   4   9   95.34    6.23
 -10  -4  -9  100.62    6.61
 -10  -4  -8    7.85    2.01
 -10   4   8    6.50    1.99
 -10   4   7  183.60    9.16
 -10  -4  -7  179.84    9.68
 -10  -4  -6    5.27    2.06
 -10   4   6    6.62    2.00
 -10  -4  -5    8.59    2.27
 -10   4   5    8.11    2.24
 -10   4   4   34.49    4.05
 -10  -4  -4   40.36    4.91
 -10  -4  -3   17.73    3.41
 -10   4   3   20.60    3.18
 -10   4   2  207.46    9.77
 -10  -4  -2  195.34   10.79
 -10  -4  -1   19.57    3.45
 -10   4   1   17.55    2.90
 -10  -4   0    1.84    1.49
 -10   4   0    1.96    1.14
 -10  -4   1   15.32    2.92
 -10   4  -1   19.23    2.81
 -10   4  -2  204.96    8.69
 -10  -4   2  166.18    9.17
  10  -4  -7  162.30    6.60
  10  -4  -8    7.45    1.40
  10  -4  -9   83.07    4.56
  10  -4 -10   25.24    2.43
 -10  -4  10   20.64    2.89
  10  -4 -11   23.97    2.29
 -10  -4  11   20.75    2.69
 -10  -4  12   41.36    3.51
  10  -4 -12   41.68    2.86
  10  -4 -13   13.29    1.55
  10  -4 -14   30.49    2.14
  10  -4 -15    5.82    0.86
  10   5 -14    2.48    0.72
  10   5 -13   37.83    2.80
 -10  -5 -12   10.08    1.83
  10   5 -12    8.20    1.42
 -10  -5 -11   42.84    3.81
 -10   5  10   77.40    5.31
 -10  -5 -10   69.27    5.16
 -10   5   9  155.64    7.81
 -10  -5  -9  162.74    8.29
 -10   5   8   68.77    5.27
 -10  -5  -8   74.23    5.80
 -10  -5  -7   20.03    3.28
 -10   5   7   22.34    3.32
 -10   5   6  111.56    7.05
 -10  -5  -6  112.39    7.64
 -10  -5  -5   13.17    2.67
 -10   5   5   19.12    3.06
 -10  -5  -4   17.63    3.29
 -10   5   4   12.86    2.44
 -10   5   3   81.91    6.06
 -10  -5  -3   82.87    6.91
 -10  -5  -2    1.03    1.49
 -10   5   2    3.37    1.63
 -10   5   1   36.81    3.96
 -10  -5  -1   32.09    4.28
 -10   5   0   42.28    4.15
 -10  -5   0   36.44    4.48
 -10   5  -1   27.64    3.23
 -10  -5   1   28.86    3.88
 -10  -5   2    2.91    1.58
 -10   5  -2    3.58    1.26
  10  -5  -8   67.61    3.87
  10  -5  -9  143.04    5.61
  10  -5 -10   61.48    3.54
 -10  -5  11   33.80    3.34
  10  -5 -11   39.13    2.70
  10  -5 -12    8.62    1.26
 -10  -5  12    8.94    1.71
  10  -5 -13   33.29    2.21
  10  -5 -14    2.01    0.61
  10   6 -14   11.31    1.32
  10   6 -13    3.24    0.88
  10   6 -12   15.02    1.81
 -10  -6 -12   19.35    2.29
 -10  -6 -11   88.33    5.27
 -10  -6 -10   65.93    4.82
 -10  -6  -9   70.48    5.27
 -10   6   8  219.10    9.34
 -10  -6  -8  217.24    9.79
 -10   6   7   41.79    4.19
 -10  -6  -7   36.31    4.20
 -10   6   6   67.34    5.28
 -10  -6  -6   67.68    5.76
 -10  -6  -5   19.09    3.26
 -10   6   5   16.96    2.78
 -10   6   4   86.09    6.01
 -10  -6  -4   85.87    6.77
 -10   6   3   37.83    3.99
 -10  -6  -3   36.03    4.53
 -10   6   2  180.13    8.58
 -10  -6  -2  189.59   10.37
 -10   6   1   35.14    3.71
 -10  -6  -1   30.57    4.18
 -10   6   0   93.00    5.83
 -10  -6   0   78.54    6.52
 -10  -6   1   26.42    3.65
 -10   6  -1   35.83    3.55
 -10  -6   2  150.39    8.48
  10  -6 -10   56.75    3.06
 -10  -6  11   74.26    4.76
  10  -6 -11   77.02    3.45
  10  -6 -12   15.64    1.48
  10  -6 -13    3.96    0.75
  10   7 -13   49.27    2.75
  10   7 -12   32.52    2.52
 -10  -7 -12   40.99    3.11
 -10  -7 -11    7.89    1.64
 -10  -7 -10    8.13    1.71
 -10  -7  -9   53.77    4.45
 -10  -7  -8   41.60    4.12
 -10  -7  -7   21.95    3.15
 -10  -7  -6  181.30    9.29
 -10   7   5   71.47    5.38
 -10  -7  -5   71.17    5.95
 -10   7   4   93.67    6.15
 -10  -7  -4   85.82    6.59
 -10  -7  -3    8.59    2.31
 -10   7   3    8.21    2.06
 -10   7   2  114.36    6.66
 -10  -7  -2   99.70    7.26
 -10   7   1   43.00    3.95
 -10  -7  -1   37.17    4.45
 -10  -7   0    2.32    1.39
 -10   7   0    2.26    1.11
 -10  -7   1   34.14    4.07
 -10  -7   2   93.67    6.50
 -10  -7  11    7.44    1.58
  10   8 -12   89.46    3.83
 -10  -8 -12   96.83    4.42
 -10  -8 -11   32.35    2.88
 -10  -8 -10   78.17    4.75
 -10  -8  -9   50.22    4.07
 -10  -8  -8   26.05    3.12
 -10  -8  -7   62.01    4.96
 -10  -8  -6   72.20    5.55
 -10  -8  -5   46.63    4.68
 -10  -8  -4   23.33    3.35
 -10  -8  -3   24.20    3.47
 -10  -8  -2   16.95    2.95
 -10  -8  -1    1.15    1.15
 -10  -8   0   61.34    5.38
 -10  -8   1    1.41    1.15
 -10  -8   2   11.93    2.31
 -10  -9 -11   11.72    1.58
 -10  -9 -10    4.15    1.09
 -10  -9  -9   14.38    2.09
 -10  -9  -8  128.18    6.50
 -10  -9  -7    6.12    1.63
 -10  -9  -6  125.44    6.97
 -10  -9  -5   27.59    3.38
 -10  -9  -4   80.99    5.89
 -10  -9  -3   28.33    3.57
 -10  -9  -2    1.97    1.37
 -10  -9  -1   10.51    2.27
 -10  -9   0    0.17    1.01
 -10  -9   1   10.45    2.19
 -10  -9   2    4.24    1.44
 -10 -10 -10   21.98    2.14
 -10 -10  -9    8.86    1.62
 -10 -10  -8   13.54    2.01
 -10 -10  -7    9.07    1.75
 -10 -10  -6   31.87    3.32
 -10 -10  -5   40.07    3.83
 -10 -10  -4   10.35    2.09
 -10 -10  -3    8.04    1.90
 -10 -10  -2   22.49    3.00
 -10 -10  -1   27.59    3.30
 -10 -10   0   16.53    2.55
 -10 -10   1   23.58    2.90
 -10 -10   2   21.64    2.61
 -10 -11  -9   12.16    1.58
 -10 -11  -8    9.98    1.59
 -10 -11  -7   60.48    4.00
 -10 -11  -6   30.43    2.96
 -10 -11  -5    3.91    1.31
 -10 -11  -4   17.41    2.44
 -10 -11  -3   75.60    4.99
 -10 -11  -2   14.80    2.25
 -10 -11  -1   12.01    2.10
 -10 -11   0    5.08    1.32
 -10 -11   1   14.89    2.15
 -10 -12  -7    7.39    1.29
 -10 -12  -6    5.82    1.27
 -10 -12  -5   21.38    2.33
 -10 -12  -4    1.11    0.82
 -10 -12  -3   12.55    1.91
 -10 -12  -2   52.56    3.82
 -10 -12  -1    2.30    0.96
 -10 -12   0    1.69    0.92
 -10 -12   1    1.47    0.88
 -10 -13  -4   18.45    1.94
 -10 -13  -3    6.72    1.23
 -10 -13  -2    3.31    0.89
 -11   0   0    0.57    1.00
 -11   0  -1   75.13    5.22
 -11   0   1   77.97    5.62
 -11   0  -2    0.37    0.95
 -11   0   2    1.27    1.13
 -11   0  -3   83.95    5.03
 -11   0   3   82.80    5.98
 -11   0   4  293.60   11.42
 -11   0   5    0.14    0.97
 -11   0   6   16.16    2.57
  11   0  -7   14.28    1.91
 -11   0   7   13.40    2.34
  11   0  -8   18.58    2.12
 -11   0   8   19.75    2.68
  11   0  -9   12.33    1.69
 -11   0   9   12.30    2.00
  11   0 -10   24.85    2.26
 -11   0  10   21.41    2.45
  11   0 -11    7.38    1.22
 -11   0  11    8.13    1.49
  11   0 -12    0.80    0.62
 -11   0  12    2.26    0.91
  11   1 -12   25.42    2.02
  11   1 -11   57.43    3.28
 -11   1  11   57.99    3.73
  11   1 -10   36.32    2.77
 -11   1  10   36.42    3.13
  11   1  -9   13.52    1.74
 -11   1   9   15.95    2.22
  11   1  -8   11.37    1.66
 -11   1   8   11.38    2.05
 -11   1   7    4.55    1.34
 -11   1   6   37.70    3.79
 -11   1   5    9.37    2.12
 -11   1   4   48.25    4.46
 -11   1   3   51.93    4.66
 -11  -1  -3   56.28    4.20
 -11   1   2  104.12    6.51
 -11  -1  -2   93.96    5.73
 -11   1   1   22.05    2.98
 -11   1   0   29.72    3.37
 -11   1  -1   18.79    2.56
 -11   1  -2   97.32    5.54
 -11  -1   3   51.96    4.72
 -11  -1   4   43.95    4.33
  11  -1  -5   11.63    1.67
 -11  -1   5    8.47    1.95
  11  -1  -6   28.65    2.52
 -11  -1   6   29.61    3.47
  11  -1  -7    7.72    1.37
 -11  -1   7    5.23    1.45
  11  -1  -8   10.77    1.55
 -11  -1   8    9.98    1.89
  11  -1  -9   13.24    1.69
 -11  -1   9   14.48    2.21
  11  -1 -10   37.11    2.66
 -11  -1  10   36.54    3.16
  11  -1 -11   56.38    3.07
 -11  -1  11   59.45    3.74
  11  -1 -12   23.26    1.81
  11   2 -12   49.00    2.78
  11   2 -11   49.00    3.02
  11   2 -10   40.86    2.95
 -11   2  10   44.05    3.46
  11   2  -9   10.51    1.58
 -11   2   9   10.80    1.88
 -11   2   8   22.37    2.78
 -11   2   7   16.04    2.45
 -11   2   6   18.05    2.68
 -11   2   5   44.33    4.17
 -11  -2  -5   49.59    4.68
 -11   2   4   61.85    4.92
 -11  -2  -4   52.99    4.90
 -11   2   3   33.90    3.70
 -11  -2  -3   32.47    3.88
 -11  -2  -2    4.63    1.67
 -11   2   2    5.14    1.62
 -11   2   1   66.90    4.98
 -11   2   0   50.95    4.24
 -11   2  -1   59.85    4.43
 -11   2  -2    5.61    1.37
 -11  -2   5   42.38    4.15
  11  -2  -6   17.74    1.96
 -11  -2   6   15.35    2.50
  11  -2  -7   13.43    1.66
 -11  -2   7   13.91    2.31
  11  -2  -8   18.46    1.90
 -11  -2   8   19.23    2.55
  11  -2  -9   11.52    1.51
 -11  -2   9    6.83    1.46
  11  -2 -10   41.69    2.62
 -11  -2  10   41.45    3.31
  11  -2 -11   45.04    2.57
 -11  -2  11   46.35    3.25
  11  -2 -12   46.43    2.39
  11   3 -12    9.90    1.27
  11   3 -11   23.19    2.09
  11   3 -10   12.20    1.65
 -11   3  10   14.59    2.05
 -11   3   9   22.64    2.60
 -11   3   8   58.42    4.30
 -11   3   7   28.85    3.16
 -11  -3  -7   28.19    3.31
 -11   3   6   67.38    4.92
 -11  -3  -6   64.74    5.13
 -11   3   5  107.98    6.35
 -11  -3  -5  106.26    6.70
 -11  -3  -4   -0.89    0.92
 -11   3   4    0.45    1.11
 -11  -3  -3    2.63    1.39
 -11   3   3    5.58    1.65
 -11   3   2   52.45    4.35
 -11  -3  -2   49.72    4.70
 -11   3   1   30.68    3.30
 -11  -3  -1   34.78    3.91
 -11   3   0  136.62    6.71
 -11  -3   0  113.26    6.87
 -11   3  -1   32.72    3.18
 -11   3  -2   56.51    3.93
 -11  -3   7   20.60    2.79
  11  -3  -8   50.04    2.90
 -11  -3   8   43.71    3.80
  11  -3  -9   19.51    1.78
 -11  -3   9   17.96    2.34
 -11  -3  10   14.33    1.97
  11  -3 -10   12.71    1.35
 -11  -3  11   24.25    2.29
  11  -3 -11   21.94    1.65
  11   4 -12    7.60    1.09
  11   4 -11   10.94    1.38
  11   4 -10   30.62    2.46
 -11   4   8   33.60    3.22
 -11  -4  -8   36.38    3.46
 -11   4   7   63.85    4.54
 -11  -4  -7   65.06    4.88
 -11   4   6   41.39    3.81
 -11  -4  -6   47.46    4.29
 -11   4   5   34.51    3.51
 -11  -4  -5   33.12    3.67
 -11  -4  -4   15.89    2.74
 -11   4   4   12.72    2.24
 -11   4   3   43.89    3.93
 -11  -4  -3   41.63    4.32
 -11   4   2  113.35    6.27
 -11  -4  -2  102.97    6.70
 -11  -4  -1   15.87    2.67
 -11   4   1   16.04    2.36
 -11  -4   0    1.52    1.17
 -11   4   0    3.46    1.27
 -11  -4   1   15.40    2.45
 -11   4  -1   15.33    2.11
 -11  -4   7   53.27    4.28
 -11  -4   8   26.99    2.98
 -11  -4   9    0.57    0.65
 -11  -4  10   31.19    2.74
  11   5 -11  100.72    4.06
  11   5 -10   25.15    2.16
 -11  -5  -9   15.29    2.09
 -11  -5  -8   10.25    1.81
 -11   5   7   35.39    3.33
 -11  -5  -7   32.29    3.33
 -11   5   6   30.13    3.13
 -11  -5  -6   29.77    3.37
 -11  -5  -5    2.38    1.28
 -11   5   5    3.84    1.42
 -11   5   4   52.23    4.16
 -11  -5  -4   43.67    4.21
 -11   5   3   40.00    3.63
 -11  -5  -3   39.38    4.03
 -11  -5  -2   13.44    2.44
 -11   5   2   12.46    2.05
 -11   5   1   27.69    2.95
 -11  -5  -1   23.25    3.13
 -11  -5   0   17.29    2.60
 -11   5   0   19.55    2.35
 -11   5  -1   28.00    2.67
 -11  -5   1   25.65    3.07
 -11  -5   8    7.59    1.54
 -11  -5   9   11.79    1.81
 -11  -5  10   21.24    2.17
  11   6 -11   13.60    1.40
  11   6 -10    5.17    1.01
 -11  -6  -9    5.26    1.34
 -11  -6  -8   70.82    4.47
 -11  -6  -7   33.22    3.24
 -11  -6  -6   12.19    2.13
 -11  -6  -5    7.67    1.87
 -11  -6  -4    3.62    1.42
 -11  -6  -3   47.32    4.30
 -11  -6  -2   11.21    2.18
 -11  -6  -1   40.52    3.89
 -11  -6   0    0.12    0.92
 -11  -6   1   39.57    3.57
 -11  -6   8   58.77    4.04
 -11  -6   9    5.73    1.28
  11   7 -10   74.34    3.25
 -11  -7  -9   10.24    1.53
 -11  -7  -8   38.80    3.09
 -11  -7  -7   50.14    3.73
 -11  -7  -6   27.30    2.94
 -11  -7  -5   96.64    5.64
 -11  -7  -4    3.84    1.40
 -11  -7  -3    8.11    1.69
 -11  -7  -2   66.67    4.80
 -11  -7  -1    2.66    1.16
 -11  -7   0   11.27    2.03
 -11  -7   1    4.14    1.33
 -11  -7   8   35.05    2.94
 -11  -7   9    8.70    1.40
 -11  -8  -9   57.62    3.23
 -11  -8  -8    6.64    1.29
 -11  -8  -7    3.36    1.10
 -11  -8  -6    8.13    1.54
 -11  -8  -5   50.67    3.78
 -11  -8  -4    4.07    1.21
 -11  -8  -3    6.32    1.48
 -11  -8  -2    8.56    1.65
 -11  -8  -1   24.10    2.66
 -11  -8   0   85.69    4.93
 -11  -8   8    6.02    1.17
 -11  -9  -7   51.35    3.19
 -11  -9  -6   26.39    2.46
 -11  -9  -5   36.34    2.99
 -11  -9  -4   34.41    2.97
 -11  -9  -3   38.13    3.16
 -11  -9  -2   35.28    3.03
 -11  -9  -1   32.60    2.90
 -11  -9   0   17.61    2.07
 -11 -10  -5    5.96    1.19
 -11 -10  -4  122.35    5.07
 -11 -10  -3    4.78    1.05
 -11 -10  -2   21.13    2.12
 -12   0   0   19.84    2.23
 -12   0  -1    0.77    0.81
 -12   0   1    1.72    0.91
 -12   0   2  226.49    7.97
 -12   0   3    1.99    0.93
 -12   0   4   34.47    3.04
 -12   0   5    4.20    1.18
 -12   0   6   46.26    3.38
 -12   0   7   34.40    2.73
 -12   0   8    0.43    0.52
 -12   1   8   10.91    1.50
 -12   1   7    6.16    1.29
 -12   1   6   29.88    2.68
 -12   1   5   80.93    4.50
 -12   1   4    9.74    1.68
 -12   1   3    1.41    0.95
 -12   1   2    6.84    1.46
 -12   1   1   69.28    4.08
 -12  -1  -1   66.37    3.82
 -12   1   0   50.33    3.33
 -12  -1   0   50.95    3.49
 -12   1  -1   68.76    3.66
 -12  -1   1   70.81    4.30
 -12  -1   2    3.99    1.17
 -12  -1   3    0.88    0.75
 -12  -1   4    8.25    1.56
 -12  -1   5   78.94    4.59
 -12  -1   6   29.14    2.65
 -12  -1   7    6.05    1.27
 -12  -1   8   12.18    1.54
 -12   2   7   45.74    3.11
 -12   2   6    9.86    1.54
  12   2  -5   78.37    3.36
 -12   2   5  101.69    4.95
 -12   2   4   29.82    2.73
 -12   2   3   67.81    4.12
 -12   2   2  112.81    5.21
 -12  -2  -2  106.05    4.54
 -12   2   1    8.59    1.46
 -12  -2  -1    9.84    1.59
 -12   2   0   89.38    4.28
 -12  -2   0   90.07    4.73
 -12  -2   1    9.01    1.56
 -12  -2   2  113.54    5.62
 -12  -2   3   71.20    4.43
 -12  -2   4   25.08    2.63
 -12  -2   5   85.06    4.68
 -12  -2   6    7.73    1.45
 -12  -2   7   43.09    3.03
 -12  -2   8   96.46    4.22
 -12   3   6    6.86    1.34
  12   3  -5   15.37    1.52
 -12   3   5   18.94    2.11
 -12   3   4   47.33    3.30
 -12   3   3   88.74    4.52
 -12   3   2   25.59    2.40
 -12  -3  -2   20.01    1.96
 -12   3   1   17.66    1.92
 -12  -3  -1   12.75    1.75
 -12   3   0   15.38    1.70
 -12  -3   0   14.65    1.92
 -12  -3   1   13.30    1.91
 -12  -3   2   20.92    2.39
 -12  -3   3   78.41    4.63
 -12  -3   4   38.95    3.19
 -12  -3   5   16.75    2.12
 -12  -3   6    4.39    1.18
 -12  -3   7    5.32    1.09
 -12  -4  -2   19.57    1.92
 -12  -4  -1   15.79    1.90
 -12  -4   0   10.50    1.60
 -12  -4   1   17.31    2.10
 -12  -4   2   21.70    2.42
 -12  -4   3   27.25    2.66
 -12  -4   4   21.99    2.34
 -12  -4   5   66.92    3.97
 -12  -4   6   29.69    2.50
 -12  -4   7   14.96    1.69
 -12  -5  -1   26.46    2.27
 -12  -5   0   27.99    2.50
 -12  -5   1   29.14    2.61
 -12  -5   2   10.64    1.66
 -12  -5   3    1.86    0.81
 -12  -5   4    1.74    0.80
 -12  -5   5   14.76    1.79
 -12  -5   6   72.67    3.72
 -12  -6   0   31.38    2.47
 -12  -6   1   20.57    2.07
 -12  -6   2   18.20    1.98
 -12  -6   3   11.85    1.61
 -12  -6   4   93.79    4.36
   0   0   0    0.00    0.00


TITL 128_1 in P2(1)2(1)2(1)
REM P2(1)2(1)2(1) (#19 in standard setting)
CELL 1.54184  10.211151  17.855915  21.067538  90.0000  90.0000  90.0000
ZERR   17.00   0.000203   0.000456   0.000422   0.0000   0.0000   0.0000
LATT -1
SYMM -x+1/2,-y, z+1/2
SYMM -x, y+1/2,-z+1/2
SYMM  x+1/2,-y+1/2,-z
SFAC C H N O
UNIT 187.00 170.00 17.00 17.00
TREF
HKLF 4
END
_computing_structure_solution     'SHELXT 2014/5 (Sheldrick, 2014)'
_computing_structure_solution     'SHELXT 2014/5 (Sheldrick, 2014)'
;
_shelx_hkl_checksum               13521
_olex2_submission_special_instructions 'No special instructions were received'
_oxdiff_exptl_absorpt_empirical_details
;
Empirical correction (ABSPACK) includes:
- Absorption correction using spherical harmonics
- Frame scaling
;
_oxdiff_exptl_absorpt_empirical_full_max 1.633
_oxdiff_exptl_absorpt_empirical_full_min 0.551
